# Supplementary material for: Visible light promoted deaminative difluoroalkylation of aliphatic amines with difluoroenoxysilanes
Source: Royal Society of Chemistry journal article supplement (doi:10.1039/d0cc05725h), 2020-01-01

# **Visible Light Promoted Deaminative Difluoroalkylation of Aliphatic Amines with Difluoroenoxysilanes**

Yang Huang,<sup>a</sup> Jia Jia,<sup>a</sup> Qi-Ping Huang,<sup>a</sup> Liang Zhao,<sup>a</sup> Pan Wang,<sup>b</sup> Jiwei Gu<sup>c</sup>  
and Chun-Yang He<sup>a\*</sup>

<sup>a</sup> Key Laboratory of Biocatalysis & Chiral Drug Synthesis of Guizhou Province, Generic Drug Research Center of Guizhou Province, School of Pharmacy, Zunyi Medical University, Zunyi, Guizhou, P. R. China

<sup>b</sup> Department of Nuclear Medicine. Affiliated Hospital of Zunyi Medical University, Zunyi, Guizhou, P. R. China.

<sup>c</sup> School of Medicine, Washington University in St. Louis, St. Louis, Missouri, United States  
*Supporting Information*

\*E-mail: hechy2002@163.com

## List of Contents

|                                                                                          |     |
|------------------------------------------------------------------------------------------|-----|
| 1) General Information                                                                   | S03 |
| 2) General Procedure for the Synthesis of Katritzky Salts <b>3</b>                       | S03 |
| 3) Detail Procedure for the Synthesis of Difluoroenoxytriethylsilane <b>4</b>            | S06 |
| 4) Detail Results for the Condition Optimization                                         | S07 |
| 5) General Procedure for Visible Light Promoted Deaminative Difluoroalkylation of Amines | S08 |
| 6) Detail Procedure for the Gram Scale Synthesis of Compound <b>5a, 5i</b>               | S08 |
| 7) General Procedure for Transformation of Compound <b>5</b>                             | S09 |
| 8) Mechanism Studies                                                                     | S11 |
| 9) Data for Compounds <b>3, 5, 6, 7, 8, 9</b>                                            | S13 |
| 10) References                                                                           | S36 |
| 11) Copies of NMR Spectra of <b>3, 4, 5, 6, 7, 8, 9, 11</b>                              | S37 |

## 1. General information.

$^1\text{H}$  NMR and  $^{13}\text{C}$  NMR spectra were recorded on an Agilent MR400 spectrometer.  $^{19}\text{F}$  NMR was recorded on an Agilent MR400 spectrometer ( $\text{CFCl}_3$  as outside standard and low field is positive). Chemical shifts ( $\delta$ ) are reported in ppm, and coupling constants ( $J$ ) are in Hertz (Hz). The following abbreviations were used to explain the multiplicities: s = singlet, d = doublet, t = triplet, q = quartet, m = multiplet, br = broad. NMR yield was determined by  $^{19}\text{F}$  NMR using *p*-fluorotoluene as an internal standard before working up the reaction.

**Materials:** All reagents were used as received from commercial sources, unless specified otherwise, or prepared as described in the literature. All reagents were weighed and handled in air at room temperature.

## 2. General procedure for the synthesis of Katritzky salts 3.

**3a**, <sup>[1]</sup> **3b**, <sup>[1]</sup> **3c**, <sup>[2]</sup> **3d**, <sup>[1]</sup> **3e**, <sup>[1]</sup> **3f**, <sup>[3]</sup> **3g**, <sup>[1]</sup> **3h**, <sup>[4]</sup> **3i**, <sup>[1]</sup> **3j**, <sup>[5]</sup> **3k**, <sup>[1]</sup> **3l**, <sup>[2]</sup> **3m**, <sup>[1]</sup> **3n**, <sup>[1]</sup> **3o**, <sup>[1]</sup> **3p**, <sup>[6]</sup> **3r**, <sup>[7]</sup> **3s**, <sup>[7]</sup> **3u**, <sup>[1]</sup> **3v**, <sup>[2]</sup> **3w**, <sup>[8]</sup> **3z**, <sup>[8]</sup> **3aa**, <sup>[8]</sup> **3ab**, <sup>[9]</sup> **3ac**, <sup>[8]</sup> **3ad**, <sup>[8]</sup> **3ae**, <sup>[8]</sup> **3af**, <sup>[8]</sup> **3ag**, <sup>[10]</sup> **3ai** <sup>[11]</sup> were prepared according to previous reported procedures. <sup>[1]</sup>, <sup>[5]</sup> **3q**, **3t**, **3x**, **3y**, **3ah** (unknown Katritzky salts) were prepared according to literature procedures <sup>[1]</sup>, <sup>[5]</sup> as described as follows:

**Procedure 2a** <sup>[1]</sup>. A 25 mL Schlenk tube equipped with a magnetic stirrer bar was charged with triphenylpyrylium tetrafluoroborate (**1**) (2.5 mmol, 1.0 equiv.) and the corresponding primary amine (**2**) (3.0 mmol, 1.2 equiv., if solid.). Ethanol (2.5 mL, 1.0 M) was added followed by the corresponding primary amine (**2**) (3.0 mmol, 1.2 equiv., if liquid). No precautions were taken to exclude oxygen or water. The reaction mixture was stirred and heated at reflux in an oil bath at 90 °C for 5 h. If precipitation occurred during the reaction, the solid was collected by filtration and washed with  $\text{Et}_2\text{O}$  (3×25 mL). If no precipitation occurred,  $\text{Et}_2\text{O}$  (7.5 mL) was added and the crude mixture was stirred for 1 h. The resulting solid was collected by filtration and washed with  $\text{Et}_2\text{O}$  (3×25 mL). If precipitation did still not take place, the solvent was removed under reduced pressure and the crude product was purified by flash column chromatography,

eluting with CH<sub>2</sub>Cl<sub>2</sub>/MeOH.

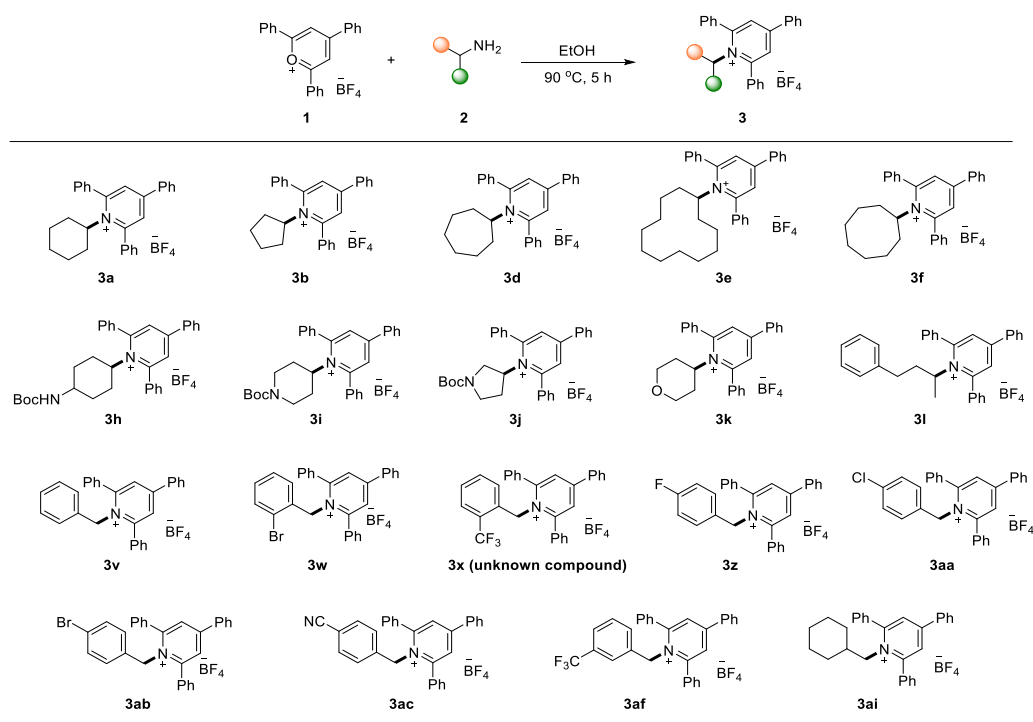

**Amine hydrochlorides as starting materials:** The corresponding amine hydrochloride (**2**) (3.0 mmol, 1.2 equiv.) was weighed into a 25 mL Schlenk tube containing a magnetic stirring bar. EtOH (2.5 mL, 1.0 M) and Et<sub>3</sub>N (3.0 mmol, 1.2 equiv.) were added successively. The resulting suspension was stirred at room temperature for 30 min. 2,4,6-Triphenylpyrylium tetrafluoroborate (**1**) (2.5 mmol, 1.0 equiv.) was added in one portion and the reaction mixture was stirred and heated at reflux in an oil bath at 90 °C for 5 h. If precipitation occurred during the reaction, the solid was collected by filtration and washed with H<sub>2</sub>O (3×25 mL, to remove Et<sub>3</sub>N·HCl salts) and Et<sub>2</sub>O (3×25 mL). If no precipitation occurred, Et<sub>2</sub>O (7.5 mL) was added and the crude mixture was stirred for 1 h. The resulting solid was collected by filtration and washed with H<sub>2</sub>O (3×25 mL, to remove Et<sub>3</sub>N·HCl salts) and Et<sub>2</sub>O (3×25 mL). If precipitation did still not take place, the solvent was removed under reduced pressure. The crude product was then dissolved in CH<sub>2</sub>Cl<sub>2</sub>, washed with H<sub>2</sub>O and concentrated under reduced pressure. The crude product was purified by flash column chromatography, eluting with CH<sub>2</sub>Cl<sub>2</sub>/MeOH.



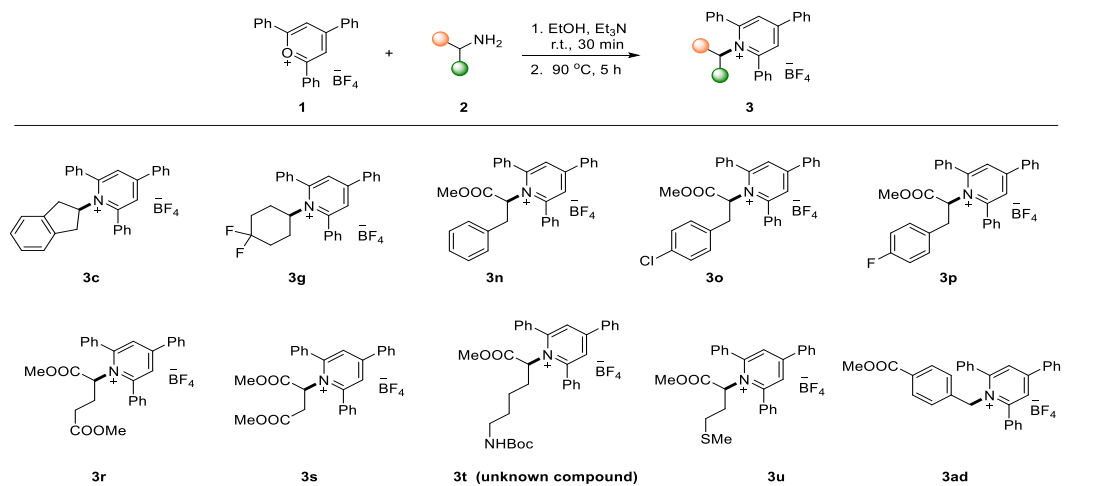

**Procedure 2b** <sup>[5]</sup>. The triphenylpyrylium tetrafluoroborate (**1**) (2.5 mmol, 1.0 equiv.) and the corresponding primary amine (**2**) (2.5 mmol, 1.0 equiv.) was weighed into a 25 ml Schlenk tube containing a magnetic stirring bar. CH<sub>2</sub>Cl<sub>2</sub> (5.0 mL, 0.5 M) and then Et<sub>3</sub>N (1.0 equiv. for free base amines; 2.0 equiv. for amine hydrochloride salts) were added successively. The mixture was stirred at room temperature for 30 min. Acetic acid (2.0 equiv.) was added and the reaction mixture was stirred at room temperature for 6 h. The reaction mixture was diluted with CH<sub>2</sub>Cl<sub>2</sub>, washed successively with aq. HCl (1.0 M, 2×25 mL), aq. NaHCO<sub>3</sub> (sat., 2×25 mL) and brine (3×25 mL), dried over anhydrous Na<sub>2</sub>SO<sub>4</sub>, filtered and concentrated. The crude product was purified by flash column chromatography, eluting with CH<sub>2</sub>Cl<sub>2</sub>/MeOH.

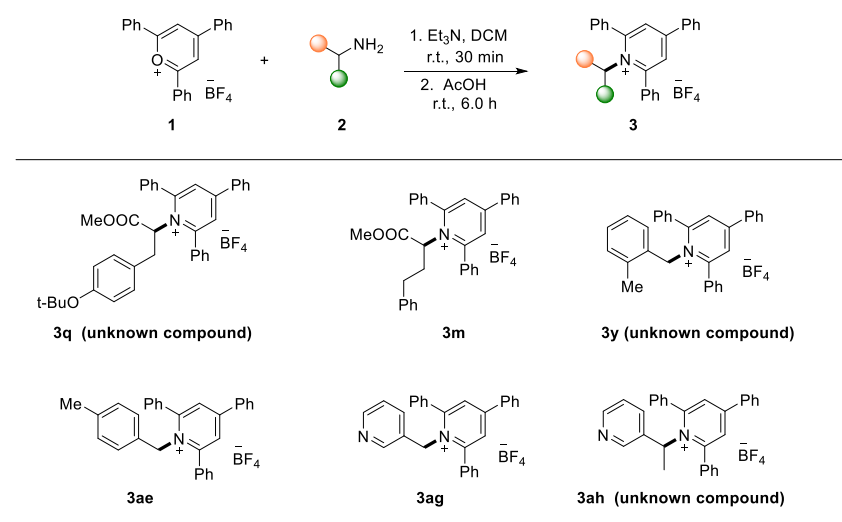

### 3. Detail procedure for the synthesis of Difluoroenoxytriethylsilane (**4**)<sup>[12]</sup>.

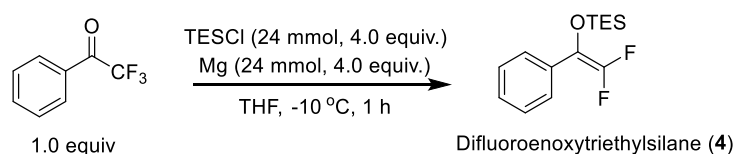

A 100 mL oven-dried reaction bottle equipped with a magnetic stirrer bar was charged with the Mg (0.58 g, 24 mmol). The bottle was evacuated and backfilled with argon three times, followed by THF (24 mL) were added with stirring, Chlorotriethylsilane (4.0 mL, 24 mmol) was added subsequently. The bottle was capped and cooled down to -10 °C under an argon atmosphere, trifluoroacetophenone (843  $\mu$ L, 6.0 mmol) was added dropwise and then the reaction mixture was stirred for additional 1 h. After evaporation of solvent, Et<sub>3</sub>N (3.3 mL, 24 mmol) was added and the mixture was stirred for 10 min. The mixture was filtered by petroleum ether, concentrated in vacuo, and purified by flash column chromatography on silica gel (pretreated with 3% Et<sub>3</sub>N/Petroleum ether), eluting with petroleum ether, afforded to pure product difluoroenoxytriethylsilane (**4**) (1.3 g, 80% yield). The reagent should be used as soon as possible after preparation. <sup>1</sup>H NMR (400 MHz, CDCl<sub>3</sub>)  $\delta$  7.53 – 7.51 (m, 2H), 7.39 (t, *J* = 7.6 Hz, 2H), 7.30 (t, *J* = 7.2 Hz, 1H), 0.98 (t, *J* = 8.0 Hz, 9H), 0.69 (q, *J* = 7.9 Hz, 6H). <sup>19</sup>F NMR (376 MHz, CDCl<sub>3</sub>)  $\delta$  -100.65 (d, *J* = 68.8 Hz, 1F), -112.49 (d, *J* = 68.8 Hz, 1F). <sup>13</sup>C NMR (101 MHz, CDCl<sub>3</sub>)  $\delta$  154.6 (t, *J* = 287.6 Hz), 132.87 (dd, *J* = 6.9, 1.8 Hz), 128.2, 127.8 (t, *J* = 1.4 Hz), 126.1 (dd, *J* = 6.6, 3.5 Hz), 114.22 (dd, *J* = 35.1, 19.0 Hz), 6.5, 4.9.

#### 4. Detail Results for the Condition Optimization <sup>a,b</sup>

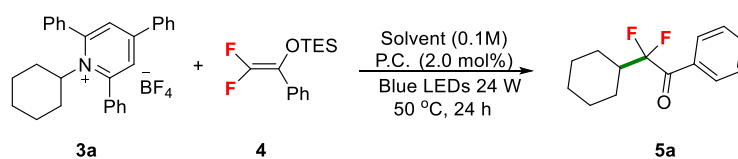

| Entry           | Catalyst                                        | Solvent                 | Yield (5a %) <sup>b</sup> |
|-----------------|-------------------------------------------------|-------------------------|---------------------------|
| 1               | [Ir(dtbbpy)(ppy) <sub>2</sub> PF <sub>6</sub> ] | DMA                     | 68                        |
| 2               | [Ir(dtbbpy)(ppy) <sub>2</sub> PF <sub>6</sub> ] | NMP                     | 64                        |
| 3               | [Ir(dtbbpy)(ppy) <sub>2</sub> PF <sub>6</sub> ] | DMF                     | 36                        |
| 4               | [Ir(dtbbpy)(ppy) <sub>2</sub> PF <sub>6</sub> ] | DMSO                    | ----                      |
| 5               | [Ir(dtbbpy)(ppy) <sub>2</sub> PF <sub>6</sub> ] | MeCN                    | 9                         |
| 6               | [Ir(dtbbpy)(ppy) <sub>2</sub> PF <sub>6</sub> ] | THF                     | 43                        |
| 7               | [Ir(dtbbpy)(ppy) <sub>2</sub> PF <sub>6</sub> ] | DME                     | 11                        |
| 8               | [Ir(dtbbpy)(ppy) <sub>2</sub> PF <sub>6</sub> ] | 1,4-Dioxane             | 10                        |
| 9               | [Ir(dtbbpy)(ppy) <sub>2</sub> PF <sub>6</sub> ] | DMA : MeCN (1:1)        | 59                        |
| 10              | [Ir(dtbbpy)(ppy) <sub>2</sub> PF <sub>6</sub> ] | DMA : DCE (1:1)         | 50                        |
| 11              | [Ir(dtbbpy)(ppy) <sub>2</sub> PF <sub>6</sub> ] | DMA : PhCl (1:1)        | 70                        |
| 12              | [Ir(dtbbpy)(ppy) <sub>2</sub> PF <sub>6</sub> ] | DMA : 1,4-Dioxane (1:1) | 73                        |
| 13              | [Ir(dtbbpy)(ppy) <sub>2</sub> PF <sub>6</sub> ] | DMA : DME (1:1)         | 85                        |
| 14              | [Ir(dtbbpy)(ppy) <sub>2</sub> PF <sub>6</sub> ] | DMA : THF (1:1)         | 85                        |
| 15              | [Ir(dtbbpy)(ppy) <sub>2</sub> PF <sub>6</sub> ] | DMA : DME (1:3)         | 97                        |
| 16              | [Ir(dtbbpy)(ppy) <sub>2</sub> PF <sub>6</sub> ] | DMA : DME (3:1)         | 75                        |
| 17              | [Ir(dtbbpy)(ppy) <sub>2</sub> PF <sub>6</sub> ] | DMA : THF (1:3)         | 84                        |
| 18              | [Ir(dtbbpy)(ppy) <sub>2</sub> PF <sub>6</sub> ] | DMA : THF (3:1)         | 72                        |
| 19              | Ru(bpy) <sub>3</sub> Cl <sub>2</sub>            | DMA : DME (1:3)         | 9                         |
| 20              | Ir(ppy) <sub>3</sub>                            | DMA : DME (1:3)         | 19                        |
| 21              | [Ir(ppy) <sub>2</sub> (bpy)]PF <sub>6</sub>     | DMA : DME (1:3)         | 36                        |
| 22 <sup>c</sup> | [Ir(dtbbpy)(ppy) <sub>2</sub> PF <sub>6</sub> ] | DMA : DME (1:3)         | 75                        |
| 23 <sup>d</sup> | [Ir(dtbbpy)(ppy) <sub>2</sub> PF <sub>6</sub> ] | DMA : DME (1:3)         | ----                      |
| 24              | ----                                            | DMA : DME (1:3)         | ----                      |
| 25 <sup>e</sup> | [Ir(dtbbpy)(ppy) <sub>2</sub> PF <sub>6</sub> ] | DMA : DME (1:3)         | 97 (92)                   |

<sup>a</sup> Reaction conditions (unless otherwise specified): 3a (0.1 mmol, 1.0 equiv.), 4 (0.2 mmol, 2.0 equiv.), P.C. (2.0 mol%), Solvent (1.0 mL), blue LEDs 24 W, 50 °C, 24 h, under argon atmosphere. <sup>b</sup> NMR yield determined by <sup>19</sup>F NMR using *p*-fluorotoluene as internal standard. <sup>c</sup> The reaction was performed at 35 °C. <sup>d</sup> The reaction was performed in the dark. <sup>e</sup> Reaction performed on a 0.2 mmol scale, 36 h, yield of isolated product given in parentheses.

## 5. General procedure for visible light promoted deaminative difluoroalkylation of aliphatic amines.

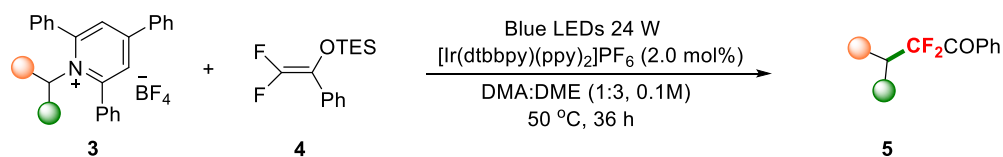

A 25 mL oven-dried Schlenk tube equipped with a magnetic stirrer bar was charged with the Katritzky salt (**3**) (0.2 mmol, 1.0 equiv.),  $[\text{Ir}(\text{dtbbpy})(\text{ppy})_2]\text{PF}_6$  (0.004 mmol, 2.0 mol%). The tube was evacuated and backfilled with argon three times, followed by DMA and DME (1:3, 2.0 mL) with stirring. Difluoroenoxytriethylsilane (**4**) (0.4 mmol, 2.0 equiv.) was added subsequently. The tube was screw capped and heated to 50 °C under irradiation of blue LEDs. After stirring for 36 h, the reaction mixture was cooled to room temperature, diluted with ethyl acetate, washed with H<sub>2</sub>O and brine, dried over anhydrous Na<sub>2</sub>SO<sub>4</sub>, filtered and concentrated. The residue was purified with silica gel chromatography to provide pure product.

## 6. Detailed procedure for the gram scale synthesis of compound **5a**, **5i**.

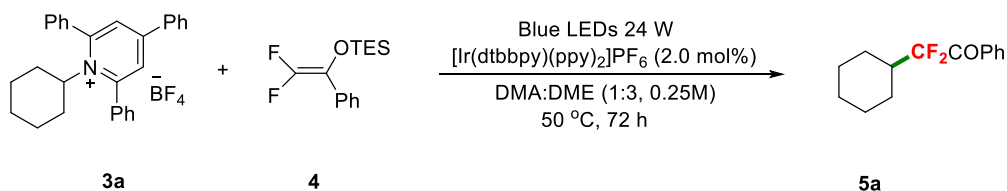

A 50 mL oven-dried Schlenk bottle equipped with a magnetic stirrer bar was charged with the **3a** (4.0 mmol, 1.0 equiv.),  $[\text{Ir}(\text{dtbbpy})(\text{ppy})_2]\text{PF}_6$  (0.08 mmol, 2.0 mol%). The bottle was evacuated and backfilled with argon three times, followed by DMA and DME (1:3, 16.0 mL) with stirring. Difluoroenoxytriethylsilane (**4**) (8.0 mmol, 2.0 equiv.) was added subsequently. The bottle was capped and heated to 50 °C under irradiation of blue LEDs. After stirring for 72 h, the reaction mixture was cooled to room temperature, diluted with ethyl acetate, washed with H<sub>2</sub>O and brine, dried over anhydrous Na<sub>2</sub>SO<sub>4</sub>, filtered and concentrated. The product **5a** (707 mg, 74% yield) was purified with silica gel chromatography (Petroleum ether/Dichloromethane = 200:1) as colorless oil.

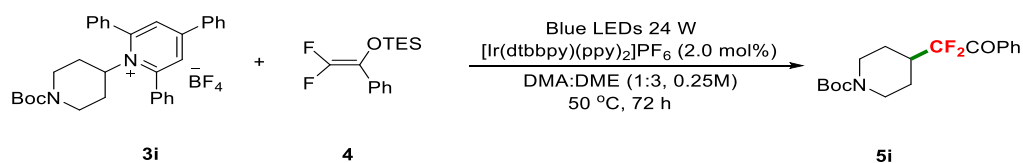

A 50 mL oven-dried Schlenk bottle equipped with a magnetic stirrer bar was charged with the **3i** (4.0 mmol, 1.0 equiv.), [Ir(dtbbpy)(ppy)<sub>2</sub>]PF<sub>6</sub> (0.08 mmol, 2.0 mol%). The bottle was evacuated and backfilled with argon three times, followed by DMA and DME (1:3, 16.0 mL) with stirring. Difluoroenoxytriethylsilane (**4**) (8.0 mmol, 2.0 equiv.) was added subsequently. The bottle was capped and heated to 50 °C under irradiation of blue LEDs. After stirring for 72 h, the reaction mixture was cooled to room temperature, diluted with ethyl acetate, washed with H<sub>2</sub>O and brine, dried over anhydrous Na<sub>2</sub>SO<sub>4</sub>, filtered and concentrated. The product **5i** (828 mg, 61% yield) was purified with silica gel chromatography (Petroleum ether/Ethyl acetate = 20:1) as pale yellow oil.

## 7. General procedure for the transformation of Compounds **5**.

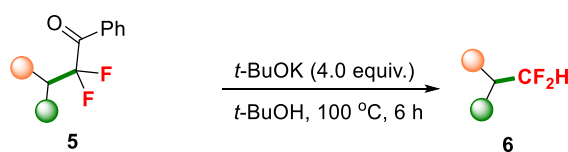

**General procedure 7a:** A mixture of **5** (0.2 mmol, 1.0 equiv.), *t*-BuOK (89.8 mg, 0.4 mmol) in *t*-BuOH (2.0 mL) was stirred at 100 °C for 6 h in a 25 ml sealed Schlenk tube. After that, the reaction mixture was cooled to room temperature, diluted with ethyl acetate, filtered and concentrated under reduced pressure. The residue was purified by column chromatography to afford product **6**.

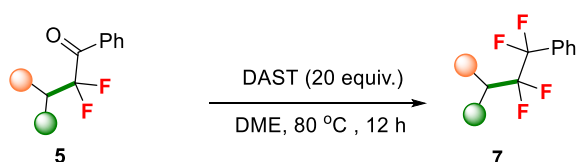

**General procedure 7b:** To a 25 mL oven-dried Schlenk tube equipped with a magnetic stirrer bar was added compound **5** (0.2 mmol, 1.0 equiv.), the tube was evacuated and backfilled with argon three times, followed by anhydrous DME (2.0 mL) were added.

The solution was cooled to -78 °C and DAST (645 mg, 4 mmol) was added dropwise with stirring. The reaction was stirred at room temperature for 10 min, then slowly heated to 80 °C and stirred for 12 hours. After cooling to room temperature, the reaction was quenched with saturated NaHCO<sub>3</sub> (aq.), and extracted with Dichloromethane three times. The combined organic phase were washed with aqueous HCl (2 M), dried over anhydrous Na<sub>2</sub>SO<sub>4</sub>, filtered and concentrated under reduced pressure. The residue was purified by column chromatography to afford product **7**.

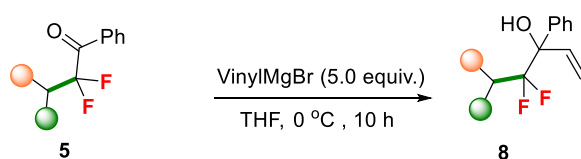

**General procedure 7c:** To a 25 mL oven-dried Schlenk tube equipped with a magnetic stirrer bar was added compound **5** (0.2 mmol, 1.0 equiv.), the tube was evacuated and backfilled with argon three times, followed by anhydrous THF (2.0 mL) were added. The solution was cooled to 0 °C and vinylmagnesium bromide (1.0 mol/L in THF) was added dropwise. The reaction was allowed to stir at 0 °C for 10 hours. The reaction was then quenched with saturated NH<sub>4</sub>Cl (aq.), and extracted with dichloromethane three times. The combined organics were washed with brine, dried over Na<sub>2</sub>SO<sub>4</sub>, filtered, and then concentrated under reduced pressure. The unpurified reaction mixture was purified on silica gel to afford product **8**.

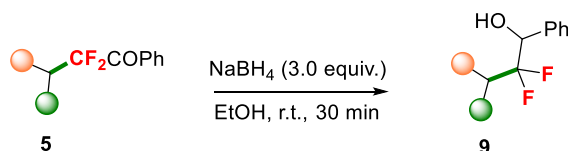

**General procedure 7d:** Compound **5** (0.2 mmol, 1.0 equiv.) was dissolved in 2.0 mL anhydrous EtOH, followed by the addition of NaBH<sub>4</sub> (22.7 mg, 0.6 mmol) in one portion at room temperature. The resulting mixture was stirred until the complete consumption of **5** as indicated by TLC analysis. Then the reaction was quenched by saturated NH<sub>4</sub>Cl (aq.), and extracted with CH<sub>2</sub>Cl<sub>2</sub> three times. The combined organic layer was washed with saturated brine, respectively. The solution was dried over

anhydrous Na<sub>2</sub>SO<sub>4</sub>, filtered and concentrated under reduced pressure. The residue was purified by column chromatography to afford product **9**.

## 8. Mechanism studies

### 8.1 Addition of radical and SET inhibitors

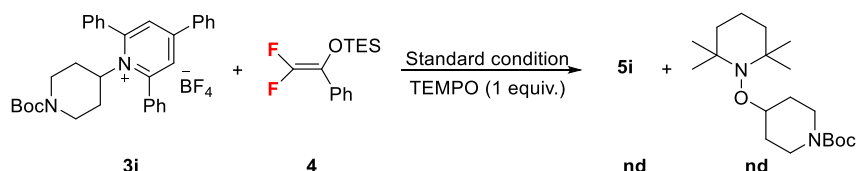

**Typical procedure:** A 25 mL oven-dried Schlenk tube equipped with a magnetic stirrer bar was charged with the Katritzky salt (**3i**) (0.2 mmol, 1.0 equiv.), [Ir(dtbbpy)(ppy)<sub>2</sub>](PF<sub>6</sub>) (0.004 mmol, 2.0 mol%). The tube was evacuated and backfilled with argon three times, followed by DMA and DME (1:3, 2.0 mL) were added with stirring. Difluoroenoxytriethylsilane (**4**) (0.4 mmol, 2.0 equiv.) was added subsequently. The tube was screw capped and heated to 50 °C under irradiation of blue LEDs. After stirring for 36 h, the reaction mixture was cooled to room temperature, monitored by TLC. The reaction was totally suppressed by the addition of a radical scavenger TEMPO (100 mol%), which suggests that the involvement of radical intermediates is likely during the reaction.

### 8.2 Trapping of intermediates:

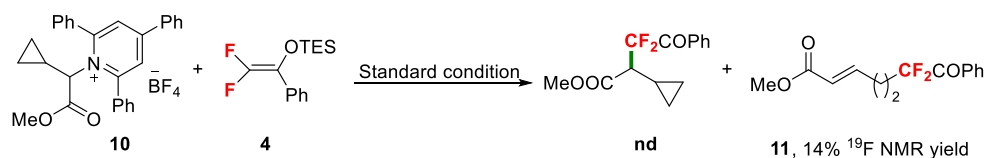

**Typical procedure:** A 25 mL oven-dried Schlenk tube equipped with a magnetic stirrer bar was charged with the Katritzky salt (**10**)<sup>[13]</sup> (0.2 mmol, 1.0 equiv.), [Ir(dtbbpy)(ppy)<sub>2</sub>](PF<sub>6</sub>) (0.004 mmol, 2.0 mol%). The tube was evacuated and backfilled with argon three times, followed by DMA and DME (1:3, 2.0 mL) were added with stirring. Difluoroenoxytriethylsilane (**4**) (0.4 mmol, 2.0 equiv.) was added subsequently. The tube was screw capped and heated to 50 °C under irradiation of blue LEDs. After

stirring for 36 h, the reaction mixture was cooled to room temperature, diluted with ethyl acetate, washed with H<sub>2</sub>O and brine, dried over anhydrous Na<sub>2</sub>SO<sub>4</sub>, filtered and concentrated. The residue was purified with silica gel chromatography to provide product **11**. (The yield of the crude ring-opened product **11** was determined to be 14% by <sup>19</sup>F-NMR analysis with p-fluorotoluene as an internal standard). <sup>1</sup>H NMR (400 MHz, CDCl<sub>3</sub>) δ 8.11 (d, *J* = 7.6 Hz, 2H), 7.65 (t, *J* = 7.4 Hz, 1H), 7.51 (t, *J* = 8.0 Hz, 2H), 7.02 – 6.95 (m, 1H), 5.90 (dt, *J* = 15.6, 1.5 Hz, 1H), 3.73 (s, 3H), 2.53 – 2.48 (m, 2H), 2.42 – 2.30 (m, 2H). <sup>19</sup>F NMR (376 MHz, CDCl<sub>3</sub>) δ -100.16 (t, *J* = 17.1 Hz). <sup>13</sup>C NMR (101 MHz, CDCl<sub>3</sub>) δ 188.9 (t, *J* = 31.6 Hz), 166.7, 146.5, 134.4, 131.7, 130.3 (t, *J* = 3.2 Hz), 128.7, 122.0, 119.1 (t, *J* = 255.1 Hz), 51.5, 32.2 (t, *J* = 23.1 Hz), 24.3 (t, *J* = 5.1 Hz). MS (ESI): *m/z* (%) 269 ([M+H]<sup>+</sup>, 100). HRMS (ESI): calculated for C<sub>14</sub>H<sub>15</sub>O<sub>3</sub>F<sub>2</sub> ([M+H]<sup>+</sup>): 269.0984; Found: 269.0981.

### 8.3 Determination of the quantum yield <sup>[1]</sup>

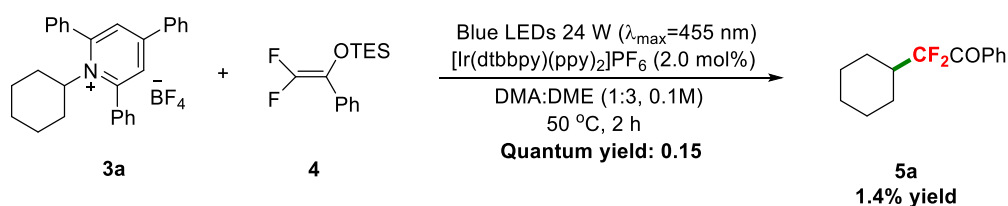

A 25 mL oven-dried Schlenk tube equipped with a magnetic stirrer bar was charged with the **3a** (1.0 mmol, 1.0 equiv.), [Ir(dtbbpy)(ppy)<sub>2</sub>]<sub>2</sub>PF<sub>6</sub> (0.02 mmol, 2.0 mol%). The tube was evacuated and backfilled with argon three times, followed by DMA and DME (1:3, 10.0 mL) with stirring. Difluoroenoxytriethylsilane (**4**) (2.0 mmol, 2.0 equiv.) was added subsequently. The tube was stored protected from light. 2.0 mL of this stock solution was transferred to a quartz cuvette under an argon atmosphere. The cuvette was capped with a stopper and sealed with parafilm. The reaction mixture was heated to 50 °C under irradiation of blue LEDs ( $\lambda_{\text{max}} = 455 \text{ nm}$ ). After stirring for 2 h, the yield determined by HPLC analysis with styrene as an internal standard. The yield of the desired product **5a** was determined to be 1.4 % ( $2.4 \times 10^{-6} \text{ mol}$ ). The reaction quantum yield ( $\Phi$ ) was determined using eq 1.



$$\Phi = \frac{\text{mol of product}}{\text{Photon flux} \cdot t \cdot f} \quad (1)$$

$$\Phi = \frac{2.4 \cdot 10^{-6} \text{ mol}}{2.25 \cdot 10^{-9} \text{ E s}^{-1} \cdot 7200 \text{ s} \cdot 0.981} = 0.15$$

## 9. Data for compounds 3, 5, 6, 7, 8, 9

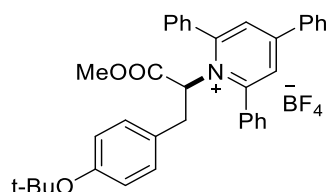

### 1-(3-(4-(Tert-butoxy)phenyl)-1-methoxy-1-oxopropan-2-yl)-2,4,6-

**triphenylpyridin-1-ium tetrafluoroborate (3q).** The product (677 mg, 43% yield) was purified with silica gel chromatography (DCM/MeOH = 100:1) as yellow solid. <sup>1</sup>H NMR (400 MHz, CDCl<sub>3</sub>) δ 7.91 (s, 2H), 7.80 (d, *J* = 8.0 Hz, 2H), 7.77 (br, 2H), 7.59 – 7.46 (m, 11H), 6.69 (s, 4H), 5.57 (dd, *J* = 7.2, 4.4 Hz, 1H), 3.69 (s, 3H), 3.38 (dd, *J* = 14.6, 4.2 Hz, 1H), 2.94 (dd, *J* = 14.4, 7.6 Hz, 1H), 1.25 (s, 9H). <sup>19</sup>F NMR (376 MHz, CDCl<sub>3</sub>) δ -152.80 (minor, <sup>11</sup>BF<sub>4</sub>), -152.85 (major, <sup>10</sup>BF<sub>4</sub>). <sup>13</sup>C NMR (101 MHz, CDCl<sub>3</sub>) δ 167.9, 156.9, 156.8, 154.4, 133.7, 132.4, 132.2, 131.5, 131.1, 129.7, 129.4, 129.0, 128.5, 127.8, 124.1, 78.5, 70.2, 53.7, 37.0, 28.7 (one carbon signal missing due to signal broadening). MS (ESI): *m/z* (%) 542 ([M-BF<sub>4</sub>]<sup>+</sup>, 100). HRMS (ESI): calculated for C<sub>37</sub>H<sub>36</sub>O<sub>3</sub>N ([M-BF<sub>4</sub>]<sup>+</sup>): 542.2690; Found: 542.2692.

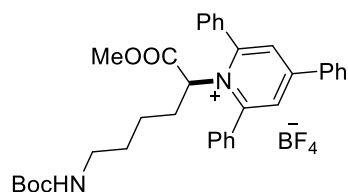

### 1-(6-((Tert-butoxycarbonyl)amino)-1-methoxy-1-oxohexan-2-yl)-2,4,6-triphenyl

**pyridin-1-ium tetrafluoroborate (3t).** The product (1.1 g, 70% yield) was purified with silica gel chromatography (DCM/MeOH = 100:1) as off-white solid. <sup>1</sup>H NMR (400 MHz, CDCl<sub>3</sub>) δ 7.94 (s, 2H), 7.84 – 7.82 (m, 2H), 7.72 (br, 2H), 7.63 – 7.51 (m,

11H), 5.31 (dd,  $J = 8.0, 4.8$  Hz, 1H), 4.91 – 4.89 (m, 1H), 3.69 (s, 3H), 2.97 – 2.92 (m, 2H), 1.95 – 1.89 (m, 2H), 1.69 – 1.61 (m, 2H), 1.40 (s, 9H), 1.27 – 1.16 (m, 2H).  $^{19}\text{F}$  NMR (376 MHz,  $\text{CDCl}_3$ )  $\delta$  -152.68 (minor,  $^{11}\text{BF}_4$ ), -152.73 (major,  $^{10}\text{BF}_4$ ).  $^{13}\text{C}$  NMR (101 MHz,  $\text{CDCl}_3$ )  $\delta$  168.7, 157.0, 156.2, 133.8, 132.5, 132.3, 131.5, 129.7, 129.2, 128.5, 127.9, 78.7, 69.0, 53.7, 39.6, 31.2, 28.8, 28.4, 24.5. (two carbon signal missing due to signal broadening). MS (ESI):  $m/z$  (%) 551 ( $[\text{M-BF}_4]^+$ , 100). HRMS (ESI): calculated for  $\text{C}_{35}\text{H}_{39}\text{O}_4\text{N}_2$  ( $[\text{M-BF}_4]^+$ ): 551.2904; Found: 551.2900.

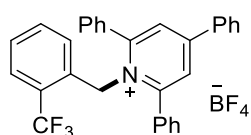

**2,4,6-Triphenyl-1-(2-(trifluoromethyl)benzyl)pyridin-1-ium tetrafluoroborate (3x).** The product (941 mg, 68% yield) was purified with silica gel chromatography ( $\text{DCM}/\text{MeOH} = 100:1$ ) as yellow solid.  $^1\text{H}$  NMR (400 MHz,  $\text{CDCl}_3$ )  $\delta$  7.89 (s, 2H), 7.76 (d,  $J = 7.6$  Hz, 2H), 7.59 – 7.49 (m, 6H), 7.45 – 7.41 (m, 4H), 7.38 – 7.29 (m, 6H), 6.82 (d,  $J = 8.0$  Hz, 1H), 5.81 (s, 2H).  $^{19}\text{F}$  NMR (376 MHz,  $\text{CDCl}_3$ )  $\delta$  -61.70 (s, 3F), -152.61 (minor,  $^{11}\text{BF}_4$ ), -152.67 (major,  $^{10}\text{BF}_4$ ).  $^{13}\text{C}$  NMR (101 MHz,  $\text{CDCl}_3$ )  $\delta$  157.2, 157.1, 133.9, 132.9, 132.2, 132.0, 131.86 – 131.83 (m), 130.9, 129.6, 128.9, 128.7, 128.4, 128.3, 127.4, 127.1, 126.3 – 126.1 (m), 125.6, 123.1 (q,  $J = 275.2$  Hz), 55.0 – 54.9 (m). MS (ESI):  $m/z$  (%) 466 ( $[\text{M-BF}_4]^+$ , 100). HRMS (ESI): calculated for  $\text{C}_{31}\text{H}_{23}\text{NF}_3$  ( $[\text{M-BF}_4]^+$ ): 466.1777; Found: 466.1779.

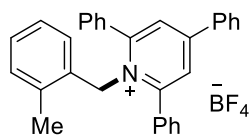

**1-(2-Methylbenzyl)-2,4,6-triphenylpyridin-1-ium tetrafluoroborate (3y) .**

The product (974 mg, 78% yield) was purified with silica gel chromatography ( $\text{DCM}/\text{MeOH} = 100:1$ ) as yellow solid.  $^1\text{H}$  NMR (400 MHz,  $\text{CDCl}_3$ )  $\delta$  7.90 (s, 2H), 7.79 – 7.76 (m, 2H), 7.60 – 7.58 (m, 4H), 7.55 – 7.44 (m, 5H), 7.41 – 7.37 (m, 4H), 7.13 – 7.05 (m, 2H), 6.86 (d,  $J = 7.2$  Hz, 1H), 6.43 (d,  $J = 7.2$  Hz, 1H), 5.65 (s, 2H),

1.59 (s, 3H).  $^{19}\text{F}$  NMR (376 MHz,  $\text{CDCl}_3$ )  $\delta$  -152.88 (minor,  $^{11}\text{BF}_4$ ), -152.93 (major,  $^{10}\text{BF}_4$ ).  $^{13}\text{C}$  NMR (101 MHz,  $\text{CDCl}_3$ )  $\delta$  157.4, 156.2, 134.9, 133.6, 132.7, 132.4, 132.3, 130.8, 130.3, 129.7, 128.9, 128.8, 128.1, 126.5, 126.4, 124.9, 55.8, 18.4. MS (ESI):  $m/z$  (%) 412 ( $[\text{M-BF}_4]^+$ , 100). HRMS (ESI): calculated for  $\text{C}_{31}\text{H}_{26}\text{N}$  ( $[\text{M-BF}_4]^+$ ): 412.2060; Found: 412.2061.

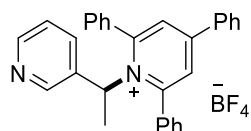

**2,4,6-Triphenyl-1-(1-(pyridin-3-yl)ethyl)pyridin-1-ium tetrafluoroborate (3ah).**

The product (500 mg, 40% yield) was purified with silica gel chromatography ( $\text{DCM}/\text{MeOH} = 100:1$ ) as yellow solid.  $^1\text{H}$  NMR (400 MHz,  $\text{CDCl}_3$ )  $\delta$  8.42 (s, 1H), 7.88 – 7.80 (m, 3H), 7.75 (s, 2H), 7.67 (d,  $J = 7.2$  Hz, 2H), 7.54 – 7.45 (m, 5H), 7.37 (t,  $J = 7.6$  Hz, 2H), 7.24 – 7.18 (m, 4H), 7.07 (br, 2H), 6.16 (q,  $J = 7.1$  Hz, 1H), 1.95 (d,  $J = 7.2$  Hz, 3H).  $^{19}\text{F}$  NMR (376 MHz,  $\text{CDCl}_3$ )  $\delta$  -152.36 (minor,  $^{11}\text{BF}_4$ ), -152.42 (major,  $^{10}\text{BF}_4$ ).  $^{13}\text{C}$  NMR (101 MHz,  $\text{CDCl}_3$ )  $\delta$  157.0, 156.1, 149.2, 146.9, 134.8, 133.7, 133.2, 132.9, 132.0, 130.7, 129.4, 129.1, 128.9, 128.7, 128.3, 124.0, 63.9, 19.0. MS (ESI):  $m/z$  (%) 413 ( $[\text{M-BF}_4]^+$ , 100). HRMS (ESI): calculated for  $\text{C}_{30}\text{H}_{25}\text{N}_2$  ( $[\text{M-BF}_4]^+$ ): 413.2012; Found: 413.2014.

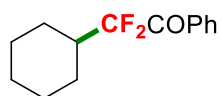

**2-Cyclohexyl-2,2-difluoro-1-phenylethan-1-one (5a).** The product (43.8 mg, 92% yield) was purified with silica gel chromatography (Petroleum ether/Dichloromethane = 200:1) as colorless oil.  $^1\text{H}$  NMR (400 MHz,  $\text{CDCl}_3$ )  $\delta$  8.08 (d,  $J = 8.0$  Hz, 2H), 7.62 (t,  $J = 7.4$  Hz, 1H), 7.49 (t,  $J = 7.8$  Hz, 2H), 2.30 – 2.18 (m, 1H), 1.84 – 1.80 (m, 4H), 1.70 – 1.66 (m, 1H), 1.34 – 1.16 (m, 5H).  $^{19}\text{F}$  NMR (376 MHz,  $\text{CDCl}_3$ )  $\delta$  -108.56 (d,  $J = 14.7$  Hz, 2F).  $^{13}\text{C}$  NMR (101 MHz,  $\text{CDCl}_3$ )  $\delta$  190.3 (t,  $J = 30.3$  Hz), 134.1, 132.8, 130.0 (t,  $J = 3.6$  Hz), 128.6, 120.3 (t,  $J = 255.5$  Hz), 42.1 (t,  $J = 21.8$  Hz), 25.8, 25.4, 24.8 (t,  $J = 4.2$  Hz). MS (EI):  $m/z$  (%) 238 ( $\text{M}^+$ ), 105 (100). HRMS (EI): calculated for

C<sub>14</sub>H<sub>16</sub>OF<sub>2</sub>: 238.1169; Found: 238.1160.

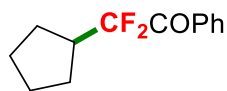

**2-Cyclopentyl-2,2-difluoro-1-phenylethan-1-one (5b).** The product (24.7 mg, 55% yield) was purified with silica gel chromatography (Petroleum ether/Dichloromethane = 200:1) as colorless oil. <sup>1</sup>H NMR (400 MHz, CDCl<sub>3</sub>) δ 8.11 (d, *J* = 7.6 Hz, 2H), 7.62 (t, *J* = 7.4 Hz, 1H), 7.49 (t, *J* = 7.8 Hz, 2H), 2.88 – 2.71 (m, 1H), 1.86 – 1.79 (m, 2H), 1.73 – 1.64 (m, 4H), 1.61 – 1.58 (m, 2H). <sup>19</sup>F NMR (376 MHz, CDCl<sub>3</sub>) δ -106.17 (d, *J* = 16.9 Hz, 2F). <sup>13</sup>C NMR (101 MHz, CDCl<sub>3</sub>) δ 189.9 (t, *J* = 31.7 Hz), 134.1, 132.5, 130.1 (t, *J* = 3.6 Hz), 128.6, 120.8 (t, *J* = 254.8 Hz), 42.7 (t, *J* = 22.1 Hz), 26.02, 25.97, 25.9. MS (EI): *m/z* (%) 224 (M<sup>+</sup>), 105 (100). HRMS (EI): calculated for C<sub>13</sub>H<sub>14</sub>OF<sub>2</sub>: 224.1013; Found: 224.1012.

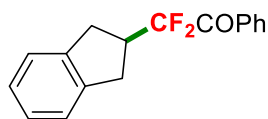

**2-(2,3-Dihydro-1H-inden-2-yl)-2,2-difluoro-1-phenylethan-1-one (5c).** The product (34.3 mg, 63% yield) was purified with silica gel chromatography (Petroleum ether/Dichloromethane = 200:1) as colorless oil. <sup>1</sup>H NMR (400 MHz, CDCl<sub>3</sub>) δ 8.17 (d, *J* = 7.6 Hz, 2H), 7.66 (t, *J* = 7.4 Hz, 1H), 7.53 (t, *J* = 7.8 Hz, 2H), 7.24 – 7.17 (m, 4H), 3.54 – 3.37 (m, 1H), 3.20 – 3.18 (m, 4H). <sup>19</sup>F NMR (376 MHz, CDCl<sub>3</sub>) δ -105.5 (d, *J* = 16.2 Hz, 2F). <sup>13</sup>C NMR (101 MHz, CDCl<sub>3</sub>) δ 189.3 (t, *J* = 31.9 Hz), 141.3, 134.3, 132.2 (t, *J* = 2.7 Hz), 130.1 (t, *J* = 3.4 Hz), 128.7, 126.6, 124.4, 120.2 (t, *J* = 255.9 Hz), 42.4 (t, *J* = 22.4 Hz), 32.8 (t, *J* = 4.6 Hz). MS (EI): *m/z* (%) 272 (M<sup>+</sup>), 116 (100). HRMS (EI): calculated for C<sub>17</sub>H<sub>14</sub>OF<sub>2</sub>: 272.1013; Found: 272.1008.

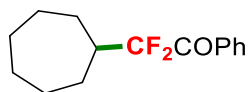

**2-Cycloheptyl-2,2-difluoro-1-phenylethan-1-one (5d).** The product (43.4 mg, 86% yield) was purified with silica gel chromatography (Petroleum ether/Dichloromethane

= 200:1) as colorless oil.  $^1\text{H}$  NMR (400 MHz,  $\text{CDCl}_3$ )  $\delta$  8.08 (d,  $J = 8.0$  Hz, 2H), 7.62 (t,  $J = 7.4$  Hz, 1H), 7.49 (t,  $J = 7.8$  Hz, 2H), 2.49 – 2.35 (m, 1H), 1.88 – 1.82 (m, 2H), 1.77 – 1.74 (m, 2H), 1.59 – 1.41 (m, 8H).  $^{19}\text{F}$  NMR (376 MHz,  $\text{CDCl}_3$ )  $\delta$  -104.18 (d,  $J = 16.5$  Hz, 2F).  $^{13}\text{C}$  NMR (101 MHz,  $\text{CDCl}_3$ )  $\delta$  190.5 (t,  $J = 30.9$  Hz), 134.0, 132.9, 129.9 (t,  $J = 3.6$  Hz), 128.6, 121.1 (t,  $J = 256.6$  Hz), 43.3 (t,  $J = 20.6$  Hz), 28.2, 26.5, 26.45, 26.41. MS (EI):  $m/z$  (%) 252 ( $\text{M}^+$ ), 105 (100). HRMS (EI): calculated for  $\text{C}_{15}\text{H}_{18}\text{OF}_2$ : 252.1326; Found: 252.1317.

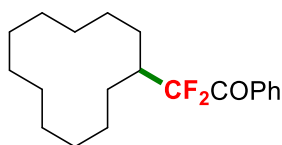

**2-Cyclododecyl-2,2-difluoro-1-phenylethan-1-one (5e).** The product (50.3 mg, 78% yield) was purified with silica gel chromatography (Petroleum ether/Dichloromethane = 200:1) as colorless oil.  $^1\text{H}$  NMR (400 MHz,  $\text{CDCl}_3$ )  $\delta$  8.07 (d,  $J = 8.0$  Hz, 2H), 7.62 (t,  $J = 7.6$  Hz, 1H), 7.49 (t,  $J = 7.8$  Hz, 2H), 2.54 – 2.40 (m, 1H), 1.59 – 1.43 (m, 9H), 1.38 – 1.29 (s, 13H).  $^{19}\text{F}$  NMR (376 MHz,  $\text{CDCl}_3$ )  $\delta$  -105.37 (d,  $J = 16.5$  Hz, 2F).  $^{13}\text{C}$  NMR (101 MHz,  $\text{CDCl}_3$ )  $\delta$  190.4 (t,  $J = 30.5$  Hz), 134.0, 132.8 (t,  $J = 1.9$  Hz), 129.9 (t,  $J = 3.5$  Hz), 128.6, 121.6 (t,  $J = 256.5$  Hz), 38.4 (t,  $J = 20.6$  Hz), 24.3, 23.6, 23.53, 23.5, 23.4, 22.5. MS (EI):  $m/z$  (%) 322 ( $\text{M}^+$ ), 105 (100). HRMS (EI): calculated for  $\text{C}_{20}\text{H}_{28}\text{OF}_2$ : 322.2108; Found: 322.2115.

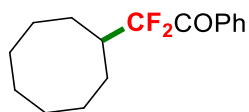

**2-Cyclooctyl-2,2-difluoro-1-phenylethan-1-one (5f).** The product (42.6 mg, 80% yield) was purified with silica gel chromatography (Petroleum ether/Dichloromethane = 200:1) as colorless oil.  $^1\text{H}$  NMR (400 MHz,  $\text{CDCl}_3$ )  $\delta$  8.08 (d,  $J = 7.6$  Hz, 2H), 7.62 (t,  $J = 7.4$  Hz, 1H), 7.49 (t,  $J = 7.8$  Hz, 2H), 2.59 – 2.45 (m, 1H), 1.80 – 1.71 (m, 4H), 1.61 – 1.45 (m, 10H).  $^{19}\text{F}$  NMR (376 MHz,  $\text{CDCl}_3$ )  $\delta$  -114.3 (d,  $J = 16.5$  Hz, 2F).  $^{13}\text{C}$  NMR (101 MHz,  $\text{CDCl}_3$ )  $\delta$  190.5 (t,  $J = 31.2$  Hz), 134.0, 132.9 (t,  $J = 2.0$  Hz), 129.9 (t,  $J = 3.5$  Hz), 128.6, 121.4 (t,  $J = 256.8$  Hz), 41.2 (t,  $J = 20.4$  Hz), 26.6, 26.2, 25.6 (t,  $J =$

4.0 Hz), 25.4. MS (EI):  $m/z$  (%) 266 ( $M^+$ ), 105 (100). HRMS (EI): calculated for  $C_{16}H_{20}OF_2$ : 266.1482; Found: 266.1479.

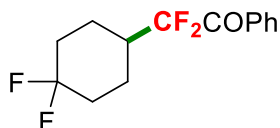

**2-(4,4-Difluorocyclohexyl)-2,2-difluoro-1-phenylethan-1-one (5g).** The product (37.8 mg, 69% yield) was purified with silica gel chromatography (Petroleum ether/Dichloromethane = 200:1) as white solid.  $^1H$  NMR (400 MHz,  $CDCl_3$ )  $\delta$  8.09 (d,  $J$  = 8.0 Hz, 2H), 7.65 (t,  $J$  = 7.2 Hz, 1H), 7.51 (t,  $J$  = 7.6 Hz, 2H), 2.45 – 2.33 (m, 1H), 2.21 – 2.18 (m, 2H), 1.97 – 1.95 (m, 2H), 1.83 – 1.63 (m, 4H).  $^{19}F$  NMR (376 MHz,  $CDCl_3$ )  $\delta$  -92.24 (d,  $J$  = 236.9 Hz, 1F), -102.44 – -103.24 (m, 1F), -107.04 (d,  $J$  = 14.3 Hz, 2F).  $^{13}C$  NMR (101 MHz,  $CDCl_3$ )  $\delta$  189.3 (t,  $J$  = 31.1 Hz), 134.4, 132.3 (t,  $J$  = 2.1 Hz), 130.1 (t,  $J$  = 3.6 Hz), 128.7, 122.5 (dd,  $J$  = 243.5, 240.9 Hz), 120.3 (td,  $J$  = 257.0, 2.2 Hz), 39.6 (td,  $J$  = 22.0, 1.1 Hz), 32.7 (dd,  $J$  = 25.8, 23.8 Hz), 21.5 – 21.3 (m). MS (EI):  $m/z$  (%) 274 ( $M^+$ ), 105 (100). HRMS (EI): calculated for  $C_{14}H_{14}OF_4$ : 274.0981; Found: 274.0990.

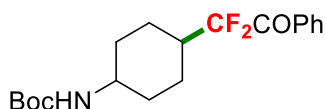

**Tert-butyl (4-(1,1-difluoro-2-oxo-2-phenylethyl)cyclohexyl)carbamate (5h).** The product (35.3 mg, 50% yield, as a 1.5:1 ratio of cis-trans isomers) was purified with silica gel chromatography (Petroleum ether/Ethyl acetate = 10:1) as pale yellow oil. For the mixture:  $^1H$  NMR (400 MHz,  $CDCl_3$ )  $\delta$  8.07 (d,  $J$  = 6.8 Hz, 4H), 7.64 – 7.61 (m, 2H), 7.51 – 7.47 (m, 4H), 4.73 – 4.40 (m, 2H), 3.85 – 3.40 (m, 2H), 2.33 – 2.19 (m, 2H), 2.10 – 2.07 (m, 2H), 1.91 – 1.85 (m, 4H), 1.72 – 1.70 (m, 2H), 1.58 – 1.38 (m, 6H), 1.44 (s, 9H), 1.43 (s, 9H), 1.15 – 1.06 (m, 2H). For the mixture:  $^{19}F$  NMR (376 MHz,  $CDCl_3$ )  $\delta$  -107.76 (d,  $J$  = 15.8 Hz, 2F), -107.52 (d,  $J$  = 15.0 Hz, 2F). For the mixture:  $^{13}C$  NMR (101 MHz,  $CDCl_3$ )  $\delta$  189.9 (t,  $J$  = 30.8 Hz), 189.8 (t,  $J$  = 30.2 Hz), 155.15, 155.09, 134.24, 134.2, 132.6, 130.0, 128.69, 128.66, 120.0 (t,  $J$  = 256.1 Hz),

119.9 (t,  $J = 256.3$  Hz), 79.2, 49.1, 44.9, 40.9 (t,  $J = 21.8$  Hz), 40.8 (t,  $J = 21.8$  Hz), 32.3, 29.2, 28.4, 23.7 (t,  $J = 3.9$  Hz), 19.5. MS (ESI):  $m/z$  (%) 376 ( $[M+Na]^+$ , 100). HRMS (ESI): calculated for  $C_{19}H_{25}O_3NF_2Na$  ( $[M+Na]^+$ ): 376.1695; Found: 376.1692.

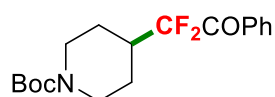

**Tert-butyl 4-(1,1-difluoro-2-oxo-2-phenylethyl)piperidine-1-carboxylate (5i).** The product (55 mg, 81% yield) was purified with silica gel chromatography (Petroleum ether/Ethyl acetate = 20:1) as pale yellow oil.  $^1H$  NMR (400 MHz,  $CDCl_3$ )  $\delta$  8.08 (d,  $J = 7.6$  Hz, 2H), 7.64 (t,  $J = 7.4$  Hz, 1H), 7.50 (t,  $J = 7.8$  Hz, 2H), 4.22 – 4.19 (m, 2H), 2.69 (t,  $J = 12.8$  Hz, 2H), 2.51 – 2.38 (m, 1H), 1.80 – 1.77 (m, 2H), 1.56 – 1.48 (m, 2H), 1.45 (s, 9H).  $^{19}F$  NMR (376 MHz,  $CDCl_3$ )  $\delta$  -107.86 (t,  $J = 12.6$  Hz, 2F).  $^{13}C$  NMR (101 MHz,  $CDCl_3$ )  $\delta$  189.5 (t,  $J = 31.0$  Hz), 154.6, 134.3, 132.4 (t,  $J = 2.1$  Hz), 130.0 (t,  $J = 3.5$  Hz), 128.7, 119.4 (t,  $J = 256.5$  Hz), 79.7, 43.1 (br), 40.2 (t,  $J = 22.2$  Hz), 28.4, 24.2. MS (ESI):  $m/z$  (%) 362 ( $[M+Na]^+$ , 100). HRMS (ESI): calculated for  $C_{18}H_{23}O_3NF_2Na$  ( $[M+Na]^+$ ): 362.1538; Found: 362.1540.

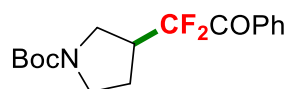

**Tert-butyl 3-(1,1-difluoro-2-oxo-2-phenylethyl)pyrrolidine-1-carboxylate (5j).** The product (29.3 mg, 45% yield) was purified with silica gel chromatography (Petroleum ether/Ethyl acetate = 20:1) as pale yellow oil.  $^1H$  NMR (400 MHz,  $CDCl_3$ )  $\delta$  8.12 (d,  $J = 7.6$  Hz, 2H), 7.65 (t,  $J = 7.4$  Hz, 1H), 7.51 (t,  $J = 7.8$  Hz, 2H), 3.71 – 3.66 (m, 2H), 3.56 (br, 1H), 3.42 – 3.32 (m, 2H), 3.21 – 3.09 (m, 1H), 2.17 – 2.00 (m, 1H), 1.46 (s, 9H).  $^{19}F$  NMR (376 MHz,  $CDCl_3$ )  $\delta$  -105.61 – -105.86 (m, 2F).  $^{13}C$  NMR (101 MHz,  $CDCl_3$ )  $\delta$  188.7 (t,  $J = 31.9$  Hz), 154.3, 134.5, 131.7, 130.2 (t,  $J = 3.3$  Hz), 128.7, 119.1 (t,  $J = 257.3$  Hz), 79.5, 45.2, 45.1, 41.6 (br), 28.4, 24.7. MS (ESI):  $m/z$  (%) 348 ( $[M+Na]^+$ , 100). HRMS (ESI): calculated for  $C_{17}H_{21}O_3NF_2Na$  ( $[M+Na]^+$ ): 348.1382; Found: 348.1381.

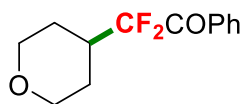

**2,2-Difluoro-1-phenyl-2-(tetrahydro-2H-pyran-4-yl)ethan-1-one (5k).** The product (28.8 mg, 60% yield) was purified with silica gel chromatography (Petroleum ether/Ethyl acetate = 50:1) as pale yellow oil.  $^1\text{H}$  NMR (400 MHz,  $\text{CDCl}_3$ )  $\delta$  8.09 (d,  $J$  = 8.0 Hz, 2H), 7.65 (t,  $J$  = 7.4 Hz, 1H), 7.51 (t,  $J$  = 7.6 Hz, 2H), 4.04 – 4.03 (m, 2H), 3.44 – 3.38 (m, 2H), 2.62 – 2.51 (m, 1H), 1.74 – 1.69 (m, 4H).  $^{19}\text{F}$  NMR (376 MHz,  $\text{CDCl}_3$ )  $\delta$  -108.68 (d,  $J$  = 14.3 Hz, 2F).  $^{13}\text{C}$  NMR (101 MHz,  $\text{CDCl}_3$ )  $\delta$  189.4 (t,  $J$  = 31.0 Hz), 134.3, 132.4 (t,  $J$  = 2.2 Hz), 130.0 (t,  $J$  = 3.6 Hz), 128.7, 119.2 (t,  $J$  = 256.2 Hz), 67.0, 39.2 (t,  $J$  = 22.5 Hz), 24.8 (t,  $J$  = 4.4 Hz). MS (EI):  $m/z$  (%) 240 ( $\text{M}^+$ ), 105 (100). HRMS (EI): calculated for  $\text{C}_{13}\text{H}_{14}\text{O}_2\text{F}_2$ : 240.0962; Found: 240.0954.

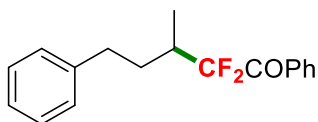

**2,2-Difluoro-3-methyl-1,5-diphenylpentan-1-one (5l).** The product (38.1 mg, 66% yield) was purified with silica gel chromatography (Petroleum ether/Dichloromethane = 150:1) as colorless oil.  $^1\text{H}$  NMR (400 MHz,  $\text{CDCl}_3$ )  $\delta$  8.02 (d,  $J$  = 7.6 Hz, 2H), 7.59 (t,  $J$  = 7.4 Hz, 1H), 7.44 (t,  $J$  = 7.8 Hz, 2H), 7.23 (d,  $J$  = 6.8 Hz, 2H), 7.18 – 7.12 (m, 3H), 2.82 – 2.75 (m, 1H), 2.60 – 2.53 (m, 1H), 2.50 – 2.34 (m, 1H), 2.04 – 1.95 (m, 1H), 1.66 – 1.56 (m, 1H), 1.11 (d,  $J$  = 6.8 Hz, 3H).  $^{19}\text{F}$  NMR (376 MHz,  $\text{CDCl}_3$ )  $\delta$  -107.7 – -107.8 (m, 2F).  $^{13}\text{C}$  NMR (101 MHz,  $\text{CDCl}_3$ )  $\delta$  190.0 (t,  $J$  = 30.6 Hz), 141.3, 134.1, 132.6, 129.9 (t,  $J$  = 3.5 Hz), 128.6, 128.4, 128.3, 126.0, 120.7 (t,  $J$  = 256.4 Hz), 37.0 (t,  $J$  = 21.8 Hz), 32.9, 30.5 (t,  $J$  = 3.7 Hz), 12.1 (t,  $J$  = 5.0 Hz). MS (EI):  $m/z$  (%) 288 ( $\text{M}^+$ ), 105 (100). HRMS (EI): calculated for  $\text{C}_{18}\text{H}_{18}\text{OF}_2$ : 288.1326; Found: 288.1321.

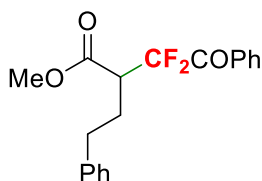



**Methyl 3,3-difluoro-4-oxo-2-phenethyl-4-phenylbutanoate (5m).** The product (62.5 mg, 94% yield) was purified with silica gel chromatography (Petroleum ether/Ethyl acetate = 140:1) as pale yellow oil.  $^1\text{H}$  NMR (400 MHz,  $\text{CDCl}_3$ )  $\delta$  8.07 (d,  $J = 7.6$  Hz, 2H), 7.64 (t,  $J = 7.4$  Hz, 1H), 7.49 (t,  $J = 7.8$  Hz, 2H), 7.33 – 7.29 (m, 2H), 7.23 – 7.21 (m, 3H), 3.72 (s, 3H), 3.51 – 3.40 (m, 1H), 2.88– 2.80 (m, 1H), 2.75 – 2.67 (m, 1H), 2.33 – 2.15 (m, 2H).  $^{19}\text{F}$  NMR (376 MHz,  $\text{CDCl}_3$ )  $\delta$  -101.09 (dd,  $J = 293.8, 11.8$  Hz, 1F), -105.00 (dd,  $J = 294.0, 17.7$  Hz, 1F).  $^{13}\text{C}$  NMR (101 MHz,  $\text{CDCl}_3$ )  $\delta$  188.7 (t,  $J = 30.9$  Hz), 170.0 – 169.9 (m), 140.5, 134.3, 131.8, 130.1 (t,  $J = 3.0$  Hz), 128.6, 128.5, 128.4, 126.2, 117.8 (dd,  $J = 263.7, 257.3$  Hz), 52.2, 48.6 (dd,  $J = 23.6, 21.5$  Hz), 33.3, 27.1 (t,  $J = 3.3$  Hz). MS (ESI):  $m/z$  (%) 333 ( $[\text{M}+\text{H}]^+$ , 100). HRMS (ESI): calculated for  $\text{C}_{19}\text{H}_{19}\text{O}_3\text{F}_2$  ( $[\text{M}+\text{H}]^+$ ): 333.1297; Found: 333.1298.

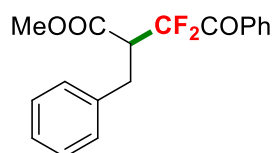

**Methyl 2-benzyl-3,3-difluoro-4-oxo-4-phenylbutanoate (5n).** The product (51.6 mg, 81% yield) was purified with silica gel chromatography (Petroleum ether/Ethyl acetate = 120:1) as pale yellow oil.  $^1\text{H}$  NMR (400 MHz,  $\text{CDCl}_3$ )  $\delta$  8.10 (d,  $J = 8.0$  Hz, 2H), 7.65 (t,  $J = 7.4$  Hz, 1H), 7.51 (t,  $J = 7.8$  Hz, 2H), 7.32 – 7.28 (m, 2H), 7.26 – 7.23 (m, 3H), 3.77 – 3.66 (m, 1H), 3.57 (s, 3H), 3.19 (d,  $J = 7.6$  Hz, 2H).  $^{19}\text{F}$  NMR (376 MHz,  $\text{CDCl}_3$ )  $\delta$  -101.94 (dd,  $J = 295.5, 13.2$  Hz, 1F), -103.74 (dd,  $J = 295.5, 15.0$  Hz, 1F).  $^{13}\text{C}$  NMR (101 MHz,  $\text{CDCl}_3$ )  $\delta$  188.3 (t,  $J = 30.9$  Hz), 169.4 (dd,  $J = 7.9, 1.5$  Hz), 137.4, 134.5, 131.7 (t,  $J = 2.9$  Hz), 130.1 (t,  $J = 3.4$  Hz), 128.9, 128.7, 128.5, 126.8, 117.5 (dd,  $J = 263.2, 259.6$  Hz), 52.1, 51.4 (dd,  $J = 23.0, 21.0$  Hz), 31.7 (t,  $J = 4.4$  Hz). MS (ESI):  $m/z$  (%) 341 ( $[\text{M}+\text{Na}]^+$ , 100). HRMS (ESI): calculated for  $\text{C}_{18}\text{H}_{16}\text{O}_3\text{F}_2\text{Na}$  ( $[\text{M}+\text{Na}]^+$ ): 341.0960; Found: 341.0960.

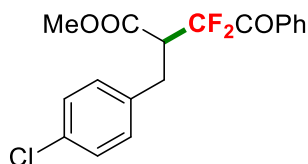

**Methyl 2-(4-chlorobenzyl)-3,3-difluoro-4-oxo-4-phenylbutanoate (5o).** The product (56.4 mg, 80% yield) was purified with silica gel chromatography (Petroleum ether/Ethyl acetate = 120:1) as pale yellow oil. <sup>1</sup>H NMR (400 MHz, CDCl<sub>3</sub>) δ 8.05 (d, *J* = 8.0 Hz, 2H), 7.61 (t, *J* = 7.4 Hz, 1H), 7.46 (t, *J* = 7.8 Hz, 2H), 7.22 (d, *J* = 8.0 Hz, 2H), 7.13 (d, *J* = 8.0 Hz, 2H), 3.70 – 3.61 (m, 1H), 3.54 (s, 3H), 3.11 (d, *J* = 7.6 Hz, 2H). <sup>19</sup>F NMR (376 MHz, CDCl<sub>3</sub>) δ -101.80 (dd, *J* = 296.1, 13.7 Hz, 1F), -103.59 (dd, *J* = 296.3, 15.0 Hz, 1F). <sup>13</sup>C NMR (101 MHz, CDCl<sub>3</sub>) δ 188.3 (t, *J* = 30.9 Hz), 169.2 (dd, *J* = 7.7, 1.5 Hz), 135.9, 134.6, 132.7, 131.6 (t, *J* = 2.8 Hz), 130.3, 130.1 (t, *J* = 3.3 Hz), 128.73, 128.69, 117.5 (dd, *J* = 263.5, 259.8 Hz), 52.2, 51.2 (dd, *J* = 22.8, 21.1 Hz), 31.1 (t, *J* = 4.4 Hz). MS (ESI): *m/z* (%) 375 ([M+Na]<sup>+</sup>, 100). HRMS (ESI): calculated for C<sub>18</sub>H<sub>15</sub>O<sub>3</sub>ClF<sub>2</sub>Na ([M+Na]<sup>+</sup>): 375.0570; Found: 375.0570.

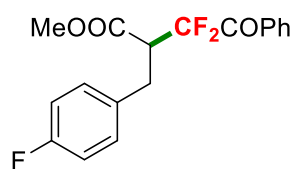

**Methyl 3,3-difluoro-2-(4-fluorobenzyl)-4-oxo-4-phenylbutanoate (5p).** The product (57.2 mg, 85% yield) was purified with silica gel chromatography (Petroleum ether/Ethyl acetate = 120:1) as pale yellow oil. <sup>1</sup>H NMR (400 MHz, CDCl<sub>3</sub>) δ 8.10 (d, *J* = 8.0 Hz, 2H), 7.66 (t, *J* = 7.4 Hz, 1H), 7.51 (t, *J* = 7.6 Hz, 2H), 7.22 – 7.18 (m, 2H), 6.98 (d, *J* = 8.6 Hz, 2H), 3.74 – 3.63 (m, 1H), 3.58 (s, 3H), 3.16 (d, *J* = 7.2 Hz, 2H). <sup>19</sup>F NMR (376 MHz, CDCl<sub>3</sub>) δ -101.91 (dd, *J* = 296.1, 13.7 Hz, 1F), -103.57 (dd, *J* = 296.1, 15.2 Hz, 1F), -115.97 – -116.05 (m, 1F). <sup>13</sup>C NMR (101 MHz, CDCl<sub>3</sub>) δ 188.3 (t, *J* = 30.9 Hz), 169.3 (dd, *J* = 7.7, 1.5 Hz), 161.8 (d, *J* = 246.1 Hz), 134.6, 133.1 (d, *J* = 3.3 Hz), 131.6 (t, *J* = 2.8 Hz), 130.4 (d, *J* = 8.0 Hz), 130.2 (t, *J* = 3.3 Hz), 128.7, 117.5 (dd, *J* = 263.4, 259.7 Hz), 115.4 (d, *J* = 21.4 Hz), 52.2, 51.5 (t, *J* = 22.0 Hz), 30.9 (t, *J* = 4.4 Hz). MS (EI): *m/z* (%) 336 (M<sup>+</sup>, 100). HRMS (EI): calculated for C<sub>18</sub>H<sub>15</sub>O<sub>3</sub>F<sub>3</sub>: 336.0973; Found: 336.0980.

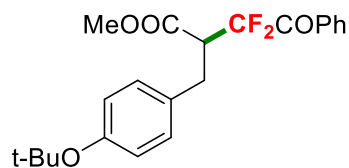

**Methyl-2-(4-(tert-butoxy)benzyl)-3,3-difluoro-4-oxo-4-phenylbutanoate (5q).** The product (50 mg, 64% yield) was purified with silica gel chromatography (Petroleum ether/Ethyl acetate = 120:1) as colorless oil.  $^1\text{H}$  NMR (400 MHz,  $\text{CDCl}_3$ )  $\delta$  8.10 (d,  $J$  = 8.0 Hz, 2H), 7.65 (t,  $J$  = 7.4 Hz, 1H), 7.50 (t,  $J$  = 7.8 Hz, 2H), 7.11 (d,  $J$  = 8.0 Hz, 2H), 6.92 (d,  $J$  = 8.0 Hz, 2H), 3.73 – 3.62 (m, 1H), 3.54 (s, 3H), 3.15 – 3.13 (m, 2H), 1.32 (s, 9H).  $^{19}\text{F}$  NMR (376 MHz,  $\text{CDCl}_3$ )  $\delta$  -102.00 (dd,  $J$  = 295.5, 13.5 Hz, 1F), -103.73 (dd,  $J$  = 295.5, 15.4 Hz, 1F).  $^{13}\text{C}$  NMR (101 MHz,  $\text{CDCl}_3$ )  $\delta$  188.4 (t,  $J$  = 31.1 Hz), 169.6 – 169.5 (m), 154.1, 134.5, 132.2, 131.7 (t,  $J$  = 2.8 Hz), 130.2 (t,  $J$  = 3.3 Hz), 129.3, 128.7, 124.3, 117.5 (dd,  $J$  = 263.1, 259.6 Hz), 78.4, 52.0, 51.5 (dd,  $J$  = 23.0, 20.6 Hz), 31.1 (t,  $J$  = 4.3 Hz), 28.8. MS (ESI):  $m/z$  (%) 413 ( $[\text{M}+\text{Na}]^+$ , 100). HRMS (ESI): calculated for  $\text{C}_{22}\text{H}_{24}\text{O}_4\text{F}_2\text{Na}$  ( $[\text{M}+\text{Na}]^+$ ): 413.1535; Found: 413.1536.

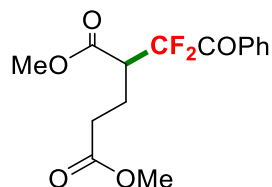

**Dimethyl 2-(1,1-difluoro-2-oxo-2-phenylethyl)pentanedioate (5r).** The product (54.7 mg, 87% yield) was purified with silica gel chromatography (Petroleum ether/Ethyl acetate = 10:1) as pale yellow oil.  $^1\text{H}$  NMR (400 MHz,  $\text{CDCl}_3$ )  $\delta$  8.07 (d,  $J$  = 7.6 Hz, 2H), 7.64 (t,  $J$  = 7.4 Hz, 1H), 7.51 (t,  $J$  = 7.6 Hz, 2H), 3.70 (s, 3H), 3.69 (s, 3H), 3.56 – 3.46 (m, 1H), 2.60 – 2.43 (m, 2H), 2.27 – 2.17 (m, 2H).  $^{19}\text{F}$  NMR (376 MHz,  $\text{CDCl}_3$ )  $\delta$  -100.75 (dd,  $J$  = 295.5, 10.5 Hz, 1F), -106.28 (dd,  $J$  = 295.3, 19.0 Hz, 1F).  $^{13}\text{C}$  NMR (101 MHz,  $\text{CDCl}_3$ )  $\delta$  188.6 (dd,  $J$  = 31.3, 29.9 Hz), 172.7, 169.6 (d,  $J$  = 10.2 Hz), 134.5, 131.7 (t,  $J$  = 2.8 Hz), 130.1 (dd,  $J$  = 3.6, 2.8 Hz), 128.7, 117.7 (dd,  $J$  = 264.8, 256.9 Hz), 52.3, 51.8, 48.1 (t,  $J$  = 22.7 Hz), 31.3, 20.5 (t,  $J$  = 4.2 Hz). MS (EI):  $m/z$  (%) 314 ( $\text{M}^+$ , 100). HRMS (EI): calculated for  $\text{C}_{15}\text{H}_{16}\text{O}_5\text{F}_2$ : 314.0966; Found: 314.0968.

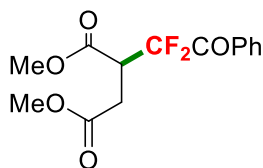

**Dimethyl 2-(1,1-difluoro-2-oxo-2-phenylethyl)succinate (5s).** The product (42.6 mg, 71% yield) was purified with silica gel chromatography (Petroleum ether/Ethyl acetate = 10:1) as pale yellow oil.  $^1\text{H}$  NMR (400 MHz,  $\text{CDCl}_3$ )  $\delta$  8.05 (d,  $J$  = 8.0 Hz, 2H), 7.64 (t,  $J$  = 7.4 Hz, 1H), 7.50 (t,  $J$  = 7.8 Hz, 2H), 4.12 – 4.01 (m, 1H), 3.73 (s, 3H), 3.67 (s, 3H), 3.07 – 3.01 (m, 1H), 2.86 – 2.81 (m, 1H).  $^{19}\text{F}$  NMR (376 MHz,  $\text{CDCl}_3$ )  $\delta$  -99.76 (dd,  $J$  = 288.4, 10.5 Hz, 1F), -105.59 (dd,  $J$  = 288.0, 18.4 Hz, 1F).  $^{13}\text{C}$  NMR (101 MHz,  $\text{CDCl}_3$ )  $\delta$  188.1 (dd,  $J$  = 30.4, 29.2 Hz), 171.2, 168.5 – 168.4 (m), 134.4, 131.9, 130.0 (t,  $J$  = 3.2 Hz), 128.7, 117.3 (dd,  $J$  = 262.6, 259.1 Hz), 52.7, 52.2, 46.0 (t,  $J$  = 23.0 Hz), 30.0 (t,  $J$  = 4.1 Hz). MS (ESI):  $m/z$  (%) 301 ( $[\text{M}+\text{H}]^+$ , 100). HRMS (ESI): calculated for  $\text{C}_{14}\text{H}_{15}\text{O}_5\text{F}_2$  ( $[\text{M}+\text{H}]^+$ ): 301.0882; Found: 301.0882.

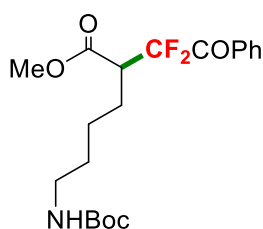

**Methyl 6-((tert-butoxycarbonyl)amino)-2-(1,1-difluoro-2-oxo-2-phenylethyl)hexanoate (5t).** The product (55.1 mg, 69% yield) was purified with silica gel chromatography (Petroleum ether/Ethyl acetate = 10:1) as pale yellow oil.  $^1\text{H}$  NMR (400 MHz,  $\text{CDCl}_3$ )  $\delta$  8.06 (d,  $J$  = 7.2 Hz, 2H), 7.62 (t,  $J$  = 7.4 Hz, 1H), 7.48 (t,  $J$  = 7.8 Hz, 2H), 4.57 (br, 1H), 3.69 (s, 3H), 3.43 – 3.32 (m, 1H), 3.11 (m, 2H), 1.96 – 1.79 (m, 2H), 1.53 – 1.45 (m, 4H), 1.42 (s, 9H).  $^{19}\text{F}$  NMR (376 MHz,  $\text{CDCl}_3$ )  $\delta$  -101.46 (dd,  $J$  = 295.2, 12.4 Hz, 1F), -104.97 (dd,  $J$  = 295.2, 17.3 Hz, 1F).  $^{13}\text{C}$  NMR (101 MHz,  $\text{CDCl}_3$ )  $\delta$  188.7 (dd,  $J$  = 31.7, 30.6 Hz), 170.2, 155.9, 134.4, 131.7 (t,  $J$  = 2.8 Hz), 130.1 (t,  $J$  = 3.3 Hz), 128.6, 117.7 (dd,  $J$  = 263.7, 257.3 Hz), 79.1, 52.2, 49.0 (dd,  $J$  = 23.8, 21.1 Hz), 40.1, 29.8, 28.3, 25.1 (t,  $J$  = 3.6 Hz), 24.5. MS (ESI):  $m/z$  (%) 422 ( $[\text{M}+\text{Na}]^+$ , 100). HRMS (ESI): calculated for  $\text{C}_{20}\text{H}_{27}\text{O}_5\text{NF}_2\text{Na}$  ( $[\text{M}+\text{Na}]^+$ ): 422.1750; Found: 422.1746.

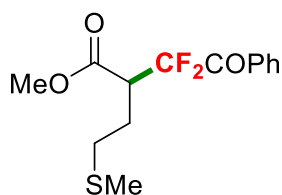

**Methyl 3,3-difluoro-2-(2-(methylthio)ethyl)-4-oxo-4-phenylbutanoate (5u).** The product (40.5 mg, 67% yield) was purified with silica gel chromatography (Petroleum ether/Ethyl acetate = 100:1) as pale yellow oil.  $^1\text{H}$  NMR (400 MHz,  $\text{CDCl}_3$ )  $\delta$  8.07 (d,  $J = 8.4$  Hz, 2H), 7.64 (t,  $J = 7.4$  Hz, 1H), 7.50 (t,  $J = 7.8$  Hz, 2H), 3.70 (s, 3H), 3.69 – 3.64 (m, 1H), 2.72 – 2.66 (m, 1H), 2.61 – 2.54 (m, 1H), 2.28 – 2.13 (m, 2H), 2.10 (s, 3H).  $^{19}\text{F}$  NMR (376 MHz,  $\text{CDCl}_3$ )  $\delta$  -100.57 (dd,  $J = 293.3$ , 11.7 Hz, 1F), -105.04 (dd,  $J = 293.3$ , 18.0 Hz, 1F).  $^{13}\text{C}$  NMR (101 MHz,  $\text{CDCl}_3$ )  $\delta$  188.6 (dd,  $J = 31.6$ , 29.7 Hz), 169.7 – 169.6 (m), 134.4, 131.8 (t,  $J = 2.9$  Hz), 130.0 (dd,  $J = 3.8$ , 2.8 Hz), 128.7, 117.8 (dd,  $J = 263.9$ , 257.2 Hz), 52.4, 47.8 (dd,  $J = 23.7$ , 21.6 Hz), 31.6, 24.7 (t,  $J = 3.5$ ), 15.0. MS (ESI):  $m/z$  (%) 303 ( $[\text{M}+\text{H}]^+$ , 100). HRMS (ESI): calculated for  $\text{C}_{14}\text{H}_{17}\text{O}_3\text{F}_2\text{S}$  ( $[\text{M}+\text{H}]^+$ ): 303.0861; Found: 303.0856.

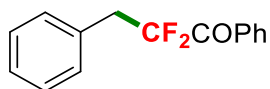

**2,2-Difluoro-1,3-diphenylpropan-1-one (5v).** This compound is known <sup>[14]</sup>. The product (37.9 mg, 77% yield) was purified with silica gel chromatography (Petroleum ether/Dichloromethane = 200:1) as white solid.  $^1\text{H}$  NMR (400 MHz,  $\text{CDCl}_3$ )  $\delta$  8.05 (d,  $J = 7.6$  Hz, 2H), 7.62 (t,  $J = 7.4$  Hz, 1H), 7.47 (t,  $J = 7.8$  Hz, 2H), 7.33 (s, 5H), 3.54 (t,  $J = 17.8$  Hz, 2H).  $^{19}\text{F}$  NMR (376 MHz,  $\text{CDCl}_3$ )  $\delta$  -98.75 (t,  $J = 17.9$  Hz, 2F).  $^{13}\text{C}$  NMR (101 MHz,  $\text{CDCl}_3$ )  $\delta$  189.5 (t,  $J = 31.3$  Hz), 134.2, 132.1 (t,  $J = 2.5$  Hz), 131.2 (t,  $J = 3.7$  Hz), 130.8, 130.1 (t,  $J = 3.3$  Hz), 128.6, 128.4, 127.6, 118.3 (t,  $J = 255.7$  Hz), 40.1 (t,  $J = 23.3$  Hz).

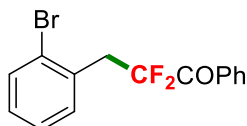

**3-(2-Bromophenyl)-2,2-difluoro-1-phenylpropan-1-one (5w).** The product (46 mg, 71% yield) was purified with silica gel chromatography (Petroleum ether/Dichloromethane = 200:1) as pale yellow oil.  $^1\text{H}$  NMR (400 MHz,  $\text{CDCl}_3$ )  $\delta$  8.12 (d,  $J = 7.6$  Hz, 2H), 7.61 (t,  $J = 8.0$  Hz, 2H), 7.49 (t,  $J = 7.8$  Hz, 2H), 7.42 (d,  $J = 7.6$  Hz, 1H), 7.3 (t,  $J = 7.4$  Hz, 1H), 7.19 – 7.15 (m, 1H), 3.77 (t,  $J = 18.2$  Hz, 2H).  $^{19}\text{F}$  NMR (376 MHz,  $\text{CDCl}_3$ )  $\delta$  -98.87 (t,  $J = 18.0$  Hz, 2F).  $^{13}\text{C}$  NMR (101 MHz,  $\text{CDCl}_3$ )  $\delta$  189.1 (t,  $J = 32.9$  Hz), 134.4, 133.1, 132.6, 131.8 (t,  $J = 2.5$  Hz), 131.5 (t,  $J = 2.4$  Hz), 130.2 (t,  $J = 3.3$  Hz), 129.3, 128.6, 127.3, 126.1, 118.2 (t,  $J = 256.6$  Hz), 39.3 (t,  $J = 23.1$  Hz). MS (ESI):  $m/z$  (%) 325 ( $[\text{M}+\text{H}]^+$ , 100). HRMS (ESI): calculated for  $\text{C}_{15}\text{H}_{12}\text{OBrF}_2$  ( $[\text{M}+\text{H}]^+$ ): 325.0034; Found: 325.0034.

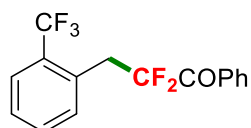

**2,2-Difluoro-1-phenyl-3-(2-(trifluoromethyl)phenyl)propan-1-one (5x).** The product (38.3 mg, 61% yield) was purified with silica gel chromatography (Petroleum ether/Dichloromethane = 200:1) as pale yellow oil.  $^1\text{H}$  NMR (400 MHz,  $\text{CDCl}_3$ )  $\delta$  8.12 (d,  $J = 7.6$  Hz, 2H), 7.71 (d,  $J = 8.0$  Hz, 1H), 7.64 (t,  $J = 7.4$  Hz, 1H), 7.57 – 7.54 (m, 2H), 7.51 – 7.48 (m, 2H), 7.43 (t,  $J = 7.2$  Hz, 1H), 3.77 (t,  $J = 18.2$  Hz, 2H).  $^{19}\text{F}$  NMR (376 MHz,  $\text{CDCl}_3$ )  $\delta$  -58.66 (t,  $J = 6.2$  Hz, 3F), -98.34 – -98.49 (m, 2F).  $^{13}\text{C}$  NMR (101 MHz,  $\text{CDCl}_3$ )  $\delta$  188.9 (t,  $J = 31.3$  Hz), 134.4, 133.1, 131.6, 130.3 (q,  $J = 30.0$  Hz), 130.2 (t,  $J = 2.8$  Hz), 130.0, 128.7, 127.7, 126.4 (q,  $J = 5.5$  Hz), 124.1 (q,  $J = 275.1$  Hz), 117.7 (t,  $J = 256.9$  Hz), 35.7 (t,  $J = 22.9$  Hz). MS (ESI):  $m/z$  (%) 337 ( $[\text{M}+\text{Na}]^+$ , 100). HRMS (ESI): calculated for  $\text{C}_{16}\text{H}_{11}\text{OF}_5\text{Na}$  ( $[\text{M}+\text{Na}]^+$ ): 337.0622; Found: 337.0624.

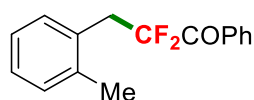

**2,2-Difluoro-1-phenyl-3-(o-tolyl)propan-1-one (5y).** This compound is known. <sup>[14]</sup> The product (29.2 mg, 56% yield) was purified with silica gel chromatography (Petroleum ether/Dichloromethane = 200:1) as colorless oil.  $^1\text{H}$  NMR (400 MHz,  $\text{CDCl}_3$ )

$\delta$  8.06 (d,  $J = 7.6$  Hz, 2H), 7.63 (d,  $J = 7.6$  Hz, 1H), 7.48 (t,  $J = 7.8$  Hz, 2H), 7.27 (d,  $J = 7.6$  Hz, 1H), 7.22 – 7.15 (m, 3H), 3.57 (t,  $J = 18.4$  Hz, 2H), 2.38 (s, 3H).  $^{19}\text{F}$  NMR (376 MHz,  $\text{CDCl}_3$ )  $\delta$  -98.67 (t,  $J = 18.0$  Hz, 2F).  $^{13}\text{C}$  NMR (101 MHz,  $\text{CDCl}_3$ )  $\delta$  189.8 (t,  $J = 31.4$  Hz), 138.0, 134.2, 132.0 (t,  $J = 2.3$  Hz), 131.7, 130.5, 130.1 (t,  $J = 3.2$  Hz), 129.8 (t,  $J = 2.5$  Hz), 128.6, 127.7, 125.8, 118.8 (t,  $J = 255.8$  Hz), 36.7 (t,  $J = 23.3$  Hz), 20.0.

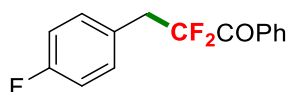

**2,2-Difluoro-3-(4-fluorophenyl)-1-phenylpropan-1-one (5z).** The product (29.1 mg, 55% yield) was purified with silica gel chromatography (Petroleum ether/Dichloromethane = 200:1) as white solid.  $^1\text{H}$  NMR (400 MHz,  $\text{CDCl}_3$ )  $\delta$  8.04 (d,  $J = 8.0$  Hz, 2H), 7.62 (t,  $J = 7.4$  Hz, 1H), 7.48 (t,  $J = 7.8$  Hz, 2H), 7.29 – 7.26 (m, 2H), 7.01 (t,  $J = 8.6$  Hz, 2H), 3.49 (t,  $J = 17.6$  Hz, 2H).  $^{19}\text{F}$  NMR (367 MHz,  $\text{CDCl}_3$ )  $\delta$  -98.86 (t,  $J = 17.5$  Hz, 2F), -114.98 – -115.08 (m, 1F).  $^{13}\text{C}$  NMR (101 MHz,  $\text{CDCl}_3$ )  $\delta$  189.2 (t,  $J = 31.3$  Hz), 162.3 (d,  $J = 247.3$  Hz), 134.3, 132.4 (d,  $J = 8.2$  Hz), 131.9 (t,  $J = 2.7$  Hz), 130.1 (t,  $J = 3.3$  Hz), 128.6, 127.0 – 126.9 (m), 118.1 (t,  $J = 256.0$  Hz), 115.3 (d,  $J = 21.5$  Hz), 39.2 (t,  $J = 23.4$  Hz). MS (EI):  $m/z$  (%) 264 ( $\text{M}^+$ ), 105 (100). HRMS (EI): calculated for  $\text{C}_{15}\text{H}_{11}\text{OF}_3$ : 264.0762; Found: 264.0752.

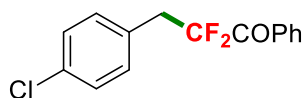

**3-(4-Chlorophenyl)-2,2-difluoro-1-phenylpropan-1-one (5aa).** The product (30.3 mg, 54% yield) was purified with silica gel chromatography (Petroleum ether/Dichloromethane = 200:1) as white solid.  $^1\text{H}$  NMR (400 MHz,  $\text{CDCl}_3$ )  $\delta$  8.02 (d,  $J = 7.6$  Hz, 2H), 7.60 (t,  $J = 7.4$  Hz, 1H), 7.45 (t,  $J = 7.8$  Hz, 2H), 7.28 – 7.21 (m, 4H), 3.46 (t,  $J = 17.6$  Hz, 2H).  $^{19}\text{F}$  NMR (367 MHz,  $\text{CDCl}_3$ )  $\delta$  -98.61 (t,  $J = 17.7$  Hz, 2F).  $^{13}\text{C}$  NMR (101 MHz,  $\text{CDCl}_3$ )  $\delta$  189.1 (t,  $J = 31.4$  Hz), 134.4, 133.6, 132.2, 131.8 (t,  $J = 2.7$  Hz), 130.1 (t,  $J = 3.3$  Hz), 129.7 (t,  $J = 3.7$  Hz), 128.7, 128.6, 118.1 (t,  $J = 256.1$  Hz), 39.3 (t,  $J = 23.4$  Hz). MS (EI):  $m/z$  (%) 280 ( $\text{M}^+$ ), 105 (100). HRMS (EI):

calculated for C<sub>15</sub>H<sub>11</sub>OF<sub>2</sub>Cl: 280.0466; Found: 280.0470.

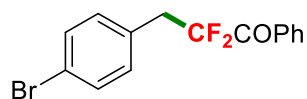

**3-(4-Bromophenyl)-2,2-difluoro-1-phenylpropan-1-one (5ab).** The product (39 mg, 60% yield) was purified with silica gel chromatography (Petroleum ether/Dichloromethane = 200:1) as white solid. <sup>1</sup>H NMR (400 MHz, CDCl<sub>3</sub>) δ 8.05 (d, *J* = 7.6 Hz, 2H), 7.63 (t, *J* = 7.0 Hz, 1H), 7.50 – 7.44 (m, 4H), 7.19 (d, *J* = 7.6 Hz, 2H), 3.47 (t, *J* = 17.6 Hz, 2H). <sup>19</sup>F NMR (367 MHz, CDCl<sub>3</sub>) δ -98.56 (t, *J* = 17.7 Hz, 2F). <sup>13</sup>C NMR (101 MHz, CDCl<sub>3</sub>) δ 189.0 (t, *J* = 31.5 Hz), 134.4, 132.5, 131.8 (t, *J* = 2.9 Hz), 131.5, 130.3 (t, *J* = 3.7 Hz), 130.1 (t, *J* = 3.3 Hz), 128.7, 121.8, 118.0 (t, *J* = 256.2 Hz), 39.4 (t, *J* = 23.4 Hz). MS (EI): *m/z* (%) 105 (100), 304. HRMS (EI): calculated for C<sub>15</sub>H<sub>11</sub>OF<sub>2</sub>Br: 323.9961; Found: 323.9968.

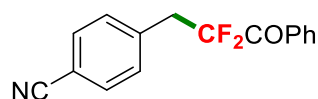

**4-(2,2-Difluoro-3-oxo-3-phenylpropyl)benzonitrile (5ac).** This compound is known [14]. The product (33.1 mg, 61% yield) was purified with silica gel chromatography (Petroleum ether/Ethyl acetate = 30:1) as white solid. <sup>1</sup>H NMR (400 MHz, CDCl<sub>3</sub>) δ 8.06 (d, *J* = 7.6 Hz, 2H), 7.66 – 7.62 (m, 3H), 7.51 – 7.45 (m, 4H), 3.58 (t, *J* = 17.4 Hz, 2H). <sup>19</sup>F NMR (367 MHz, CDCl<sub>3</sub>) δ -98.01 (t, *J* = 17.5 Hz, 2F). <sup>13</sup>C NMR (101 MHz, CDCl<sub>3</sub>) δ 188.5 (t, *J* = 33.5 Hz), 136.9 (t, *J* = 3.5 Hz), 134.6, 132.0, 131.6, 131.5 (t, *J* = 2.9 Hz), 130.1 (t, *J* = 3.3 Hz), 128.7, 118.6, 117.9 (t, *J* = 257.1 Hz), 111.6, 39.8 (t, *J* = 23.4 Hz).

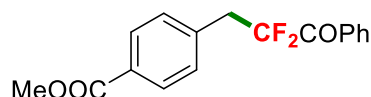

**Methyl 4-(2,2-difluoro-3-oxo-3-phenylpropyl)benzoate (5ad).** This compound is known. [15] The product (46.3 mg, 76% yield) was purified with silica gel chromatography (Petroleum ether/Ethyl acetate = 20:1) as white solid. <sup>1</sup>H NMR (400



MHz, CDCl<sub>3</sub>)  $\delta$  8.05 (d,  $J$  = 7.6 Hz, 2H), 7.99 (d,  $J$  = 8.0 Hz, 2H), 7.62 (t,  $J$  = 7.4 Hz, 1H), 7.47 (t,  $J$  = 7.8 Hz, 2H), 7.40 (d,  $J$  = 8.0 Hz, 2H), 3.91 (s, 3H), 3.57 (t,  $J$  = 17.8 Hz, 2H). <sup>19</sup>F NMR (376 MHz, CDCl<sub>3</sub>)  $\delta$  -98.2 (t,  $J$  = 17.5 Hz, 2F). <sup>13</sup>C NMR (101 MHz, CDCl<sub>3</sub>)  $\delta$  188.9 (t,  $J$  = 31.3 Hz), 166.8, 136.6 (t,  $J$  = 3.5 Hz), 134.4, 131.8 (t,  $J$  = 2.8 Hz), 130.9, 130.1 (t,  $J$  = 3.3 Hz), 129.6, 129.4, 128.6, 118.1 (t,  $J$  = 256.6 Hz), 52.1, 39.9 (t,  $J$  = 23.4 Hz).

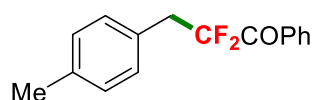

**2,2-Difluoro-1-phenyl-3-(p-tolyl)propan-1-one (5ae).** This compound is known.<sup>[14]</sup> The product (21.3 mg, 41% yield) was purified with silica gel chromatography (Petroleum ether/Dichloromethane = 200:1) as white solid. <sup>1</sup>H NMR (400 MHz, CDCl<sub>3</sub>)  $\delta$  8.04 (d,  $J$  = 7.6 Hz, 2H), 7.62 (d,  $J$  = 7.6 Hz, 1H), 7.47 (t,  $J$  = 7.6 Hz, 2H), 7.21 – 7.12 (m, 4H), 3.48 (t,  $J$  = 18.0 Hz, 2H), 2.34 (s, 3H). <sup>19</sup>F NMR (376 MHz, CDCl<sub>3</sub>)  $\delta$  -98.85 (t,  $J$  = 17.9 Hz, 2F). <sup>13</sup>C NMR (101 MHz, CDCl<sub>3</sub>)  $\delta$  189.5 (t,  $J$  = 31.3 Hz), 137.3, 134.2, 132.1 (t,  $J$  = 2.4 Hz), 130.7, 130.1 (t,  $J$  = 3.3 Hz), 129.1, 128.6, 128.0 (t,  $J$  = 3.6 Hz), 118.3 (t,  $J$  = 255.5 Hz), 39.7 (t,  $J$  = 23.3 Hz), 21.1.

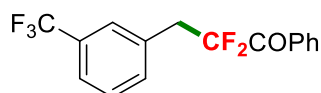

**2,2-Difluoro-1-phenyl-3-(3-(trifluoromethyl)phenyl)propan-1-one (5af).** This compound is known.<sup>[14]</sup> The product (47 mg, 75% yield) was purified with silica gel chromatography (Petroleum ether/Dichloromethane = 200:1) as pale yellow oil. <sup>1</sup>H NMR (400 MHz, CDCl<sub>3</sub>)  $\delta$  8.07 (d,  $J$  = 7.6 Hz, 2H), 7.64 (t,  $J$  = 7.2 Hz, 1H), 7.60 – 7.44 (m, 6H), 3.58 (t,  $J$  = 17.6 Hz, 2H). <sup>19</sup>F NMR (376 MHz, CDCl<sub>3</sub>)  $\delta$  -69.95 (s, 3F), -105.78 (t,  $J$  = 17.5 Hz, 2F). <sup>13</sup>C NMR (101 MHz, CDCl<sub>3</sub>)  $\delta$  188.8 (t,  $J$  = 31.5 Hz), 134.5, 134.3, 132.3 (t,  $J$  = 3.6 Hz), 131.7 (t,  $J$  = 2.8 Hz), 130.8 (q,  $J$  = 32.5 Hz), 130.1 (t,  $J$  = 3.2 Hz), 128.8, 128.7, 127.6 (q,  $J$  = 3.8 Hz), 124.5 (q,  $J$  = 3.8 Hz), 123.9 (q,  $J$  = 273.6 Hz), 118.0 (t,  $J$  = 256.5 Hz), 39.6 (t,  $J$  = 23.4 Hz).

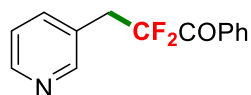

**2,2-Difluoro-1-phenyl-3-(pyridin-3-yl)propan-1-one (5ag).** The product (32 mg, 65% yield) was purified with silica gel chromatography (Petroleum ether/Ethyl acetate = 10:1) as pale yellow oil.  $^1\text{H}$  NMR (400 MHz,  $\text{CDCl}_3$ )  $\delta$  8.58 – 8.54 (m, 2H), 8.07 (d,  $J$  = 7.6 Hz, 2H), 7.70 (d,  $J$  = 7.6 Hz, 1H), 7.64 (t,  $J$  = 7.4 Hz, 1H), 7.49 (t,  $J$  = 7.8 Hz, 2H), 7.28 – 7.26 (m, 1H), 3.53 (t,  $J$  = 17.6 Hz, 2H).  $^{19}\text{F}$  NMR (376 MHz,  $\text{CDCl}_3$ )  $\delta$  -98.34 (t,  $J$  = 16.9 Hz, 2F).  $^{13}\text{C}$  NMR (101 MHz,  $\text{CDCl}_3$ )  $\delta$  188.6 (t,  $J$  = 31.4 Hz), 151.5, 148.7, 138.4, 134.5, 131.6 (t,  $J$  = 3.0 Hz), 130.1 (t,  $J$  = 3.3 Hz), 128.7, 127.5, 123.3, 117.9 (t,  $J$  = 256.6 Hz), 37.2 (t,  $J$  = 23.7 Hz). MS (ESI):  $m/z$  (%) 248 ( $[\text{M}+\text{H}]^+$ , 100). HRMS (ESI): calculated for  $\text{C}_{14}\text{H}_{12}\text{ONF}_2$  ( $[\text{M}+\text{H}]^+$ ): 248.0881; Found: 248.0879.

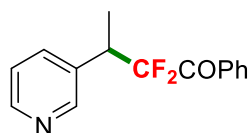

**2,2-Difluoro-1-phenyl-3-(pyridin-3-yl)butan-1-one (5ah).** The product (23 mg, 44% yield) was purified with silica gel chromatography (Petroleum ether/Ethyl acetate = 10:1) as pale yellow oil.  $^1\text{H}$  NMR (400 MHz,  $\text{CDCl}_3$ )  $\delta$  8.53 – 8.51 (m, 2H), 7.99 (d,  $J$  = 8.0 Hz, 2H), 7.71 (d,  $J$  = 8.0 Hz, 1H), 7.62 (t,  $J$  = 7.6 Hz, 1H), 7.46 (t,  $J$  = 7.8 Hz, 2H), 7.29 – 7.26 (m, 1H), 3.87 – 3.74 (m, 1H), 1.51 (d,  $J$  = 7.2 Hz, 3H).  $^{19}\text{F}$  NMR (376 MHz,  $\text{CDCl}_3$ )  $\delta$  -104.06 (dd,  $J$  = 282.9, 15.6 Hz, 1F), -105.64 (dd,  $J$  = 282.8, 15.8 Hz, 1F).  $^{13}\text{C}$  NMR (101 MHz,  $\text{CDCl}_3$ )  $\delta$  189.2 (t,  $J$  = 30.7 Hz), 150.3, 148.7, 136.7, 134.3, 133.4, 132.3, 129.9 (t,  $J$  = 3.2 Hz), 128.7, 123.4, 119.0 (t,  $J$  = 259.3 Hz), 41.3 (t,  $J$  = 22.6 Hz), 14.3. MS (ESI):  $m/z$  (%) 262 ( $[\text{M}+\text{H}]^+$ , 100). HRMS (ESI): calculated for  $\text{C}_{15}\text{H}_{14}\text{ONF}_2$  ( $[\text{M}+\text{H}]^+$ ): 262.1038; Found: 262.1039.

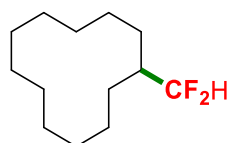

**(Difluoromethyl)cyclododecane (6e).** The product (28.4 mg, 65% yield) was purified

with silica gel chromatography (Petroleum ether) as colorless oil.  $^1\text{H}$  NMR (400 MHz,  $\text{CDCl}_3$ )  $\delta$  5.64 (td,  $J = 57.0, 4.4$  Hz, 1H), 1.95 – 1.87 (m, 1H), 1.43 – 1.31 (m, 22H).  $^{19}\text{F}$  NMR (376 MHz,  $\text{CDCl}_3$ )  $\delta$  -121.83 (dd,  $J = 57.0, 15.2$  Hz, 2F).  $^{13}\text{C}$  NMR (101 MHz,  $\text{CDCl}_3$ )  $\delta$  119.7 (t,  $J = 243.3$  Hz), 38.1 (t,  $J = 18.1$  Hz), 24.1, 23.58, 23.56, 23.41, 23.40, 23.3, 22.2. MS (EI):  $m/z$  (%) 218 ( $\text{M}^+$ ), 97 (100). HRMS (EI): calculated for  $\text{C}_{13}\text{H}_{24}\text{F}_2$ : 218.1841; Found: 218.1844.

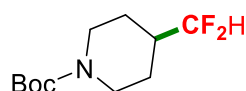

**Tert-butyl 4-(difluoromethyl)piperidine-1-carboxylate (6i).** This compound is known. <sup>[16]</sup> The product (38.1 mg, 81% yield) was purified with silica gel chromatography (Petroleum ether/Ethyl acetate = 20:1) as white solid.  $^1\text{H}$  NMR (400 MHz,  $\text{CDCl}_3$ )  $\delta$  5.57 (td,  $J = 56.7, 4.5$  Hz, 1H), 4.17 (br, 2H), 2.68 (t,  $J = 11.8$  Hz, 2H), 1.97 – 1.84 (m, 1H), 1.74 – 1.70 (m, 2H), 1.45 (s, 9H), 1.38 – 1.29 (m, 2H).  $^{19}\text{F}$  NMR (376 MHz,  $\text{CDCl}_3$ )  $\delta$  -119.13 – -119.39 (m, 2F).  $^{13}\text{C}$  NMR (101 MHz,  $\text{CDCl}_3$ )  $\delta$  154.6, 118.2 (t,  $J = 242.9$  Hz), 79.6, 42.8 (br), 40.1 (t,  $J = 20.3$  Hz), 28.3, 24.6 (t,  $J = 4.7$  Hz).

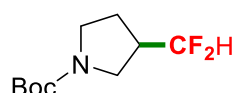

**Tert-butyl 3-(difluoromethyl)pyrrolidine-1-carboxylate (6j).** This compound is known. <sup>[16]</sup> The product (31.4 mg, 71% yield) was purified with silica gel chromatography (Petroleum ether/Ethyl acetate = 15:1) as pale yellow oil.  $^1\text{H}$  NMR (400 MHz,  $\text{CDCl}_3$ )  $\delta$  5.72 (td,  $J = 56.4, 5.2$  Hz, 1H), 3.53 – 3.44 (m, 2H), 3.37 – 3.29 (m, 2H), 2.68 – 2.56 (m, 1H), 2.06 – 1.98 (m, 1H), 1.93 – 1.84 (m, 1H), 1.44 (s, 9H).  $^{19}\text{F}$  NMR (376 MHz,  $\text{CDCl}_3$ )  $\delta$  -119.24 – -121.30 (m, 2F).  $^{13}\text{C}$  NMR (101 MHz,  $\text{CDCl}_3$ )  $\delta$  154.2, 117.0 (t,  $J = 242.3$  Hz), 79.5, 45.1 (t,  $J = 5.5$  Hz), 45.0, 42.2 (br), 28.4, 25.0.

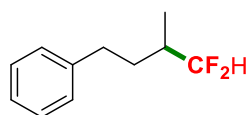

**(4,4-difluoro-3-methylbutyl)benzene (6l).** The product (23 mg, 63% yield) was

purified with silica gel chromatography (Petroleum ether) as colorless oil.  $^1\text{H}$  NMR (400 MHz,  $\text{CDCl}_3$ )  $\delta$  7.31 (t,  $J = 7.4$  Hz, 2H), 7.21 (t,  $J = 7.8$  Hz, 3H), 5.65 (td,  $J = 56.9$ , 3.5 Hz, 1H), 2.80 – 2.73 (m, 1H), 2.67 – 2.59 (m, 1H), 1.96 – 1.86 (m, 2H), 1.61 – 1.52 (m, 1H), 1.07 (d,  $J = 6.8$  Hz, 3H).  $^{19}\text{F}$  NMR (376 MHz,  $\text{CDCl}_3$ )  $\delta$  -122.6 (ddd,  $J = 276.7$ , 56.8, 13.5 Hz, 1F), -124.17 (ddd,  $J = 276.7$ , 57.0, 16.4 Hz, 1F).  $^{13}\text{C}$  NMR (101 MHz,  $\text{CDCl}_3$ )  $\delta$  141.6, 128.4, 128.3, 126.0, 119.2 (t,  $J = 243.4$  Hz), 36.7 (t,  $J = 19.5$  Hz), 32.8, 31.4 (t,  $J = 4.3$  Hz), 12.3 (t,  $J = 5.4$  Hz). MS (EI):  $m/z$  (%) 184 ( $\text{M}^+$ ), 91 (100). HRMS (EI): calculated for  $\text{C}_{11}\text{H}_{14}\text{F}_2$ : 184.1058; Found: 184.1055.

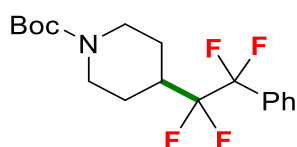

**Tert-butyl 4-(1,1,2,2-tetrafluoro-2-phenylethyl)piperidine-1-carboxylate (7i).** The product (40 mg, 55% yield) was purified with silica gel chromatography (Petroleum ether/Ethyl acetate = 25:1) as pale yellow oil.  $^1\text{H}$  NMR (400 MHz,  $\text{CDCl}_3$ )  $\delta$  7.56 – 7.44 (m, 5H), 4.20 (br, 2H), 2.70 – 2.65 (m, 2H), 2.34 – 2.21 (m, 1H), 1.94 – 1.91 (m, 2H), 1.57 – 1.52 (m, 2H), 1.46 (s, 9H).  $^{19}\text{F}$  NMR (376 MHz,  $\text{CDCl}_3$ )  $\delta$  -109.41 – -109.42 (m, 2F), -117.74 – -117.77 (m, 2F).  $^{13}\text{C}$  NMR (101 MHz,  $\text{CDCl}_3$ )  $\delta$  154.6, 130.94 – 130.86 (m), 129.83 – 129.8 (m), 128.2, 126.7 – 126.5 (m), 122.0 – 116.9 (m), 79.7, 43.1 (br), 38.8 (t,  $J = 22.8$  Hz), 28.4, 24.5. MS (ESI):  $m/z$  (%) 384 ( $[\text{M}+\text{Na}]^+$ , 100). HRMS (ESI): calculated for  $\text{C}_{18}\text{H}_{23}\text{O}_2\text{NF}_4\text{Na}$  ( $[\text{M}+\text{Na}]^+$ ): 384.1557; Found: 384.1556.

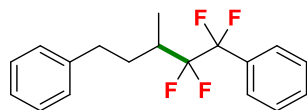

**(1,1,2,2-Tetrafluoro-3-methylpentane-1,5-diyl)dibenzene (7l).** The product (34.8 mg, 56% yield) was purified with silica gel chromatography (Petroleum ether) as colorless oil.  $^1\text{H}$  NMR (400 MHz,  $\text{CDCl}_3$ )  $\delta$  7.56 – 7.43 (m, 5H), 7.31 (t,  $J = 7.4$  Hz, 2H), 7.24 – 7.19 (m, 3H), 2.85 – 2.77 (m, 1H), 2.63 – 2.55 (m, 1H), 2.33 – 2.21 (m, 1H), 2.19 – 2.11 (m, 1H), 1.73 – 1.63 (m, 1H), 1.23 (d,  $J = 7.2$  Hz, 3H).  $^{19}\text{F}$  NMR (376 MHz,  $\text{CDCl}_3$ )

$\delta$  -108.05 – -109.99 (m, 2F), -114.93 – -117.57 (m, 2F).  $^{13}\text{C}$  NMR (101 MHz,  $\text{CDCl}_3$ )  $\delta$  141.5, 131.7 (t,  $J = 25.2$  Hz), 130.7 (t,  $J = 1.4$  Hz), 128.4, 128.35, 128.2, 126.6 – 126.5 (m), 126.0, 122.0 – 117.0 (m), 35.5 (t,  $J = 22.1$  Hz), 33.0, 31.0, 12.7 – 12.5 (m). MS (EI):  $m/z$  (%) 310 ( $\text{M}^+$ , 100). HRMS (EI): calculated for  $\text{C}_{18}\text{H}_{18}\text{F}_4$ : 310.1339; Found: 310.1343.

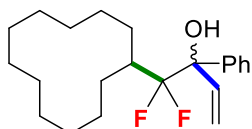

**1-Cyclododecyl-1,1-difluoro-2-phenylbut-3-en-2-ol (8e).** The product (57.5 mg, 82% yield) was purified with silica gel chromatography (Petroleum ether/Ethyl acetate = 80:1) as pale yellow oil.  $^1\text{H}$  NMR (400 MHz,  $\text{CDCl}_3$ )  $\delta$  7.59 (d,  $J = 7.6$  Hz, 2H), 7.38 – 7.29 (m, 3H), 6.70 – 6.62 (m, 1H), 5.45 – 5.33 (m, 2H), 2.43 (br, 1H), 2.09 – 1.97 (m, 1H), 1.72 – 1.65 (m, 1H), 1.43 – 1.19 (m, 19H), 1.13 – 0.99 (m, 2H).  $^{19}\text{F}$  NMR (376 MHz,  $\text{CDCl}_3$ )  $\delta$  -105.91 – -106.63 (m 1F), -112.28 – -113.02 (m, 1F).  $^{13}\text{C}$  NMR (101 MHz,  $\text{CDCl}_3$ )  $\delta$  139.7 (d,  $J = 3.4$  Hz), 139.1 (d,  $J = 5.3$  Hz), 128.0, 127.7, 126.33 – 126.3 (m), 125.5 (t,  $J = 257.8$  Hz), 115.5, 79.4 (t,  $J = 27.8$  Hz), 37.4 (t,  $J = 21.8$  Hz), 24.5, 24.4, 23.9, 23.6, 23.07, 23.06, 22.8, 22.2. MS (EI):  $m/z$  (%) 350 ( $\text{M}^+$ ), 134 (100). HRMS (EI): calculated for  $\text{C}_{22}\text{H}_{32}\text{OF}_2$ : 350.2416; Found: 350.2420.

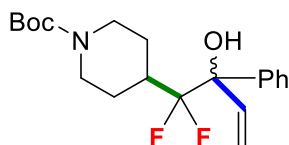

**Tert-butyl 4-(1,1-difluoro-2-hydroxy-2-phenylbut-3-en-1-yl)piperidine-1-carboxylate (8i).** The product (44 mg, 60% yield) was purified with silica gel chromatography (Petroleum ether/Ethyl acetate = 10:1) as pale yellow oil.  $^1\text{H}$  NMR (400 MHz,  $\text{CDCl}_3$ )  $\delta$  7.58 – 7.56 (m, 2H), 7.39 – 7.31 (m, 3H), 6.64 – 6.57 (m, 1H), 5.44 – 5.33 (m, 2H), 4.06 – 3.98 (m, 2H), 2.56 (br, 1H), 2.44 (t,  $J = 12.8$ , 2H), 2.00 – 1.85 (m, 2H), 1.45 – 1.32 (m, 3H), 1.42 (s, 9H).  $^{19}\text{F}$  NMR (376 MHz,  $\text{CDCl}_3$ )  $\delta$  -110.01 – -110.72 (m, 1F), -116.26 – -116.97 (m, 1F).  $^{13}\text{C}$  NMR (101 MHz,  $\text{CDCl}_3$ )  $\delta$  154.6,

139.44 – 139.4 (m), 138.7 – 138.67 (m), 128.2, 127.9, 126.1 – 126.0 (m), 123.3 (t,  $J = 255.7$  Hz), 115.8, 79.4, 79.1 (t,  $J = 27.2$  Hz), 43.3 (br), 39.8 (t,  $J = 23.6$  Hz), 28.4, 25.6, 24.9. MS (ESI):  $m/z$  (%) 390 ( $[M+Na]^+$ , 100). HRMS (ESI): calculated for  $C_{20}H_{27}O_3NF_2Na$  ( $[M+Na]^+$ ): 390.1851; Found: 390.1854.

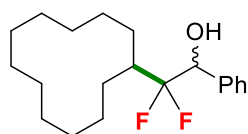

**2-Cyclododecyl-2,2-difluoro-1-phenylethan-1-ol (9e).** The product (57 mg, 88% yield) was purified with silica gel chromatography (Petroleum ether/Ethyl acetate = 10:1) as colorless oil.  $^1H$  NMR (400 MHz,  $CDCl_3$ )  $\delta$  7.45 – 7.43 (m, 2H), 7.40 – 7.37 (m, 3H), 4.96 – 4.90 (m, 1H), 2.34 (br, 1H), 2.08 – 1.99 (m, 1H), 1.65 – 1.58 (m, 1H), 1.54 – 1.31 (m, 21H).  $^{19}F$  NMR (376 MHz,  $CDCl_3$ )  $\delta$  -113.00 – -113.75 (m 1F), -114.04 – -114.77 (m, 1F).  $^{13}C$  NMR (101 MHz,  $CDCl_3$ )  $\delta$  137.0 (d,  $J = 2.6$  Hz), 128.6, 128.2, 127.8, 125.0 (t,  $J = 251.1$  Hz), 74.1 (dd,  $J = 29.5, 27.3$  Hz), 37.6 (t,  $J = 21.5$  Hz), 24.7 (d,  $J = 1.9$  Hz), 24.0, 23.5 (t,  $J = 4.1$  Hz), 23.4, 23.3, 23.2, 23.1, 22.3. MS (EI):  $m/z$  (%) 324 ( $M^+$ ), 107 (100). HRMS (EI): calculated for  $C_{20}H_{30}OF_2$ : 324.2259; Found: 324.2258.

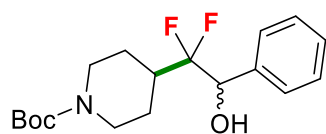

**Tert-butyl 4-(1,1-difluoro-2-hydroxy-2-phenylethyl)piperidine-1-carboxylate (9i).** The product (64.2 mg, 94% yield) was purified with silica gel chromatography (Petroleum ether/Ethyl acetate = 10:1) as white solid.  $^1H$  NMR (400 MHz,  $CDCl_3$ )  $\delta$  7.42 – 7.40 (m, 2H), 7.36 – 7.34 (m, 3H), 4.85 (t,  $J = 12.2$ , 1H), 4.11 – 4.09 (m, 2H), 3.07 (br, 1H), 2.61 – 2.55 (m, 2H), 2.09 – 2.00 (m, 1H), 1.84 (d,  $J = 13.2$ , 1H), 1.70 (d,  $J = 13.2$ , 1H), 1.51 – 1.43 (m, 2H), 1.41 (s, 9H).  $^{19}F$  NMR (376 MHz,  $CDCl_3$ )  $\delta$  -117.13 (s, 2F).  $^{13}C$  NMR (101 MHz,  $CDCl_3$ )  $\delta$  154.7, 136.8, 128.6, 128.3, 127.7, 122.8 (t,  $J = 249.7$  Hz), 79.7, 73.5 (t,  $J = 28.3$  Hz), 43.1 (br), 39.3 (t,  $J = 23.5$  Hz), 28.4, 25.0 (t,  $J =$

4.6 Hz), 24.2 (t,  $J = 4.4$  Hz). MS (ESI):  $m/z$  (%) 364 ( $[M+Na]^+$ , 100). HRMS (ESI): calculated for  $C_{18}H_{25}O_3NF_2Na$  ( $[M+Na]^+$ ): 364.1695; Found: 364.1691.

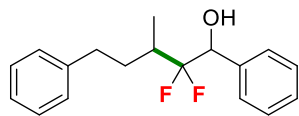

**2,2-Difluoro-3-methyl-1,5-diphenylpentan-1-ol (9l).** The product (56.3 mg, 97% yield, as a 1.1:1 ratio of diastereoisomers) was purified with silica gel chromatography (Petroleum ether/Ethyl acetate = 10:1) as pale yellow oil. For the mixture:  $^1H$  NMR (400 MHz,  $CDCl_3$ )  $\delta$  7.44 – 7.35 (m, 10H), 7.31 – 7.26 (m, 4H), 7.22 – 7.14 (m, 6H), 4.97 – 4.91 (m, 2H), 2.80 – 2.73 (m, 2H), 2.56 – 2.49 (m, 2H), 2.33 (br, 2H), 2.11 – 1.96 (m, 4H), 1.67 – 1.54 (m, 2H), 1.17 (d,  $J = 7.2$  Hz, 3H), 1.10 (d,  $J = 6.8$  Hz, 3H). For the mixture:  $^{19}F$  NMR (376 MHz,  $CDCl_3$ )  $\delta$  -115.64 (dt,  $J = 250.4$ , 14.1 Hz, 1F), -117.57 (dt,  $J = 250.0$ , 13.7 Hz, 1F), -116.49 (dt,  $J = 250.4$ , 14.1 Hz, 1F), -117.08 – -117.82 (m, 1F). For the mixture:  $^{13}C$  NMR (101 MHz,  $CDCl_3$ )  $\delta$  141.8, 141.7, 136.8, 136.7, 128.7, 128.6, 128.36, 128.35, 128.32, 128.30, 128.28, 127.73 – 127.68 (m), 125.9, 125.86, 124.1 (dd,  $J = 251.0$ , 249.9 Hz), 73.8 (dd,  $J = 29.3$ , 27.1 Hz), 73.7 (dd,  $J = 30.0$ , 27.2 Hz), 36.1 (t,  $J = 22.8$  Hz), 36.0 (t,  $J = 22.9$  Hz), 33.2, 33.1, 31.4 (t,  $J = 4.2$  Hz), 31.1 (t,  $J = 4.0$  Hz), 12.7 (t,  $J = 5.3$  Hz), 12.3 (t,  $J = 5.2$  Hz). MS (EI):  $m/z$  (%) 290.2 ( $M^+$ ), 107.7 (100). HRMS (EI): calculated for  $C_{18}H_{20}OF_2$ : 290.1477; Found: 290.1484.

## 10. References

- [1] F. J. R. Klauck, M. J. James and F. Glorius, *Angew. Chem., Int. Ed.*, 2017, **56**, 12336.
- [2] J. Wu, L. He, A. Noble and V. K. Aggarwal, *J. Am. Chem. Soc.*, 2018, **140**, 10700.
- [3] J. Hu, G. Wang, S. Li and Z. Shi, *Angew. Chem., Int. Ed.*, 2018, **57**, 15227.
- [4] J. Hu, B. Cheng, X. Yang and T.-P. Loh, *Adv. Synth. Catal.*, 2019, **361**, 4902.
- [5] S. Plunkett, C. H. Basch, S. O. Santana and M. P. Watson, *J. Am. Chem. Soc.*, 2019, **141**, 2257.
- [6] M. Yang, T. Cao, T. Xu and S. Liao, *Org. Lett.*, 2019, **21**, 8673.
- [7] M.-M. Zhang and F. Liu, *Org. Chem. Front.*, 2018, **5**, 3443.
- [8] F. J. R. Klauck, H. Toon, M. J. James, M. Lautens and F. Glorius, *ACS Catal.*, 2019, **9**, 236.
- [9] M. Ociepa, J. Turkowska and D. Gryko, *ACS Catal.*, 2018, **8**, 11362.
- [10] J. Liao, W. Guan, B. P. Boscoe, J. W. Tucker, J. W. Tomlin, M. R. Garnsey and M. P. Watson, *Org. Lett.*, 2018, **20**, 3030.
- [11] F. Sandfort, F. S. Kalthoff, F. J. R. Klauck, M. J. James and F. Glorius, *Chem. – Eur. J.*, 2018, **24**, 17210.
- [12] Y.-B. Wu, G.-P. Lu, B.-J. Zhou, M.-J. Bu, L. Wan and C. Cai, *Chem. Commun.*, 2016, **52**, 5965.
- [13] M. E. Hoerrner, K. M. Baker, C. H. Basch, E. M. Bampo and M. P. Watson, *Org. Lett.*, 2019, **21**, 7356.
- [14] M.-H. Yang, J. R. Hunt, N. Sharifi and R. A. Altman, *Angew. Chem., Int. Ed.*, 2016, **55**, 9080.
- [15] S. S. Ashirbaev, V. V. Levin, M. I. Struchkova and A. D. Dilman, *J. Org. Chem.*, 2017, **83**, 478.
- [16] X. Zeng, W. Yan, S. B. Zacate, T.-H. Chao, X. Sun, Z. Cao, K. G. E. Bradford, M. Paeth, S. B. Tyndall, K. Yang, T.-C. Kuo, M.-J. Cheng and W. Liu, *J. Am. Chem. Soc.*, 2019, **141**, 11398.



# 11. Copies of NMR spectra of 3, 4, 5, 6, 7, 8, 9, 11

## 1-(3-(4-(Tert-butoxy)phenyl)-1-methoxy-1-oxopropan-2-yl)-2,4,6-triphenylpyridin-1-ium tetrafluoroborate (3q).

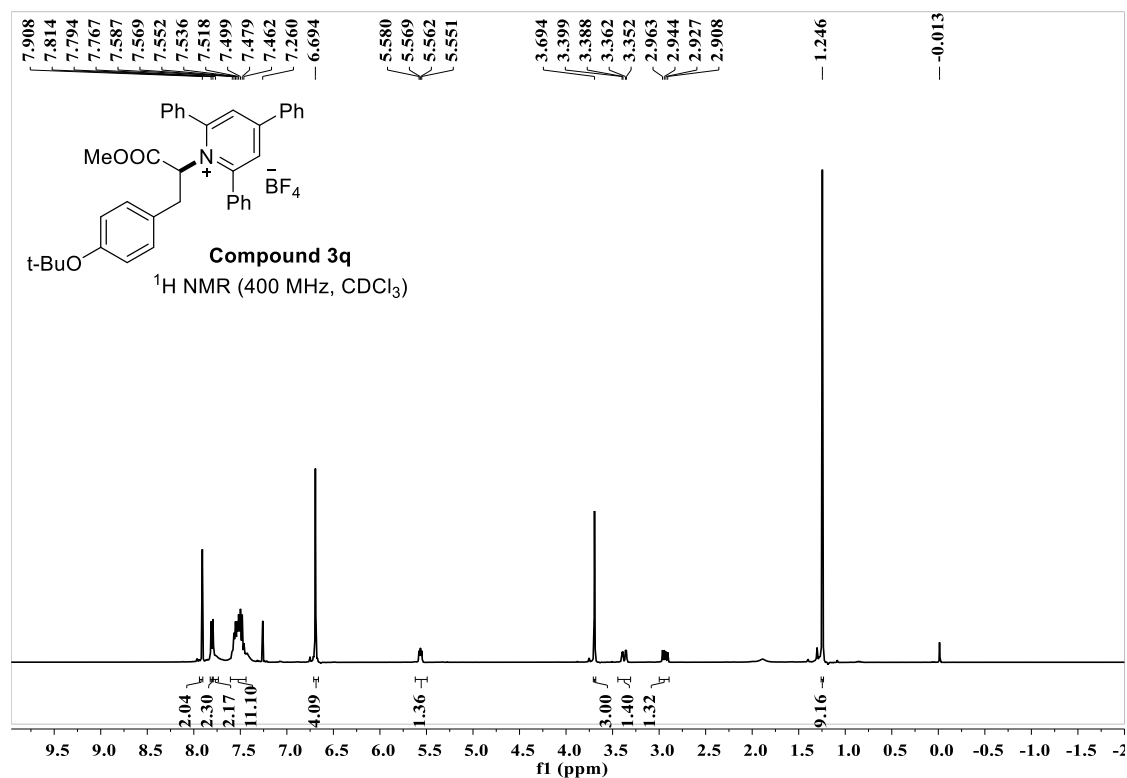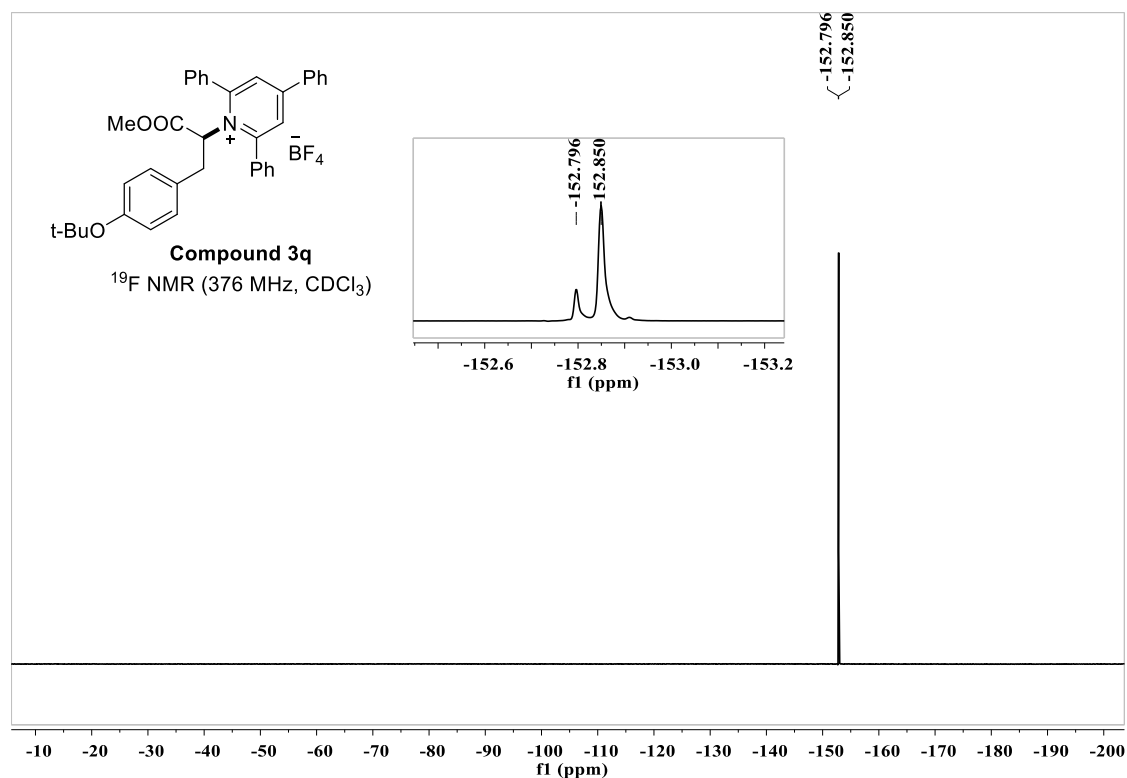

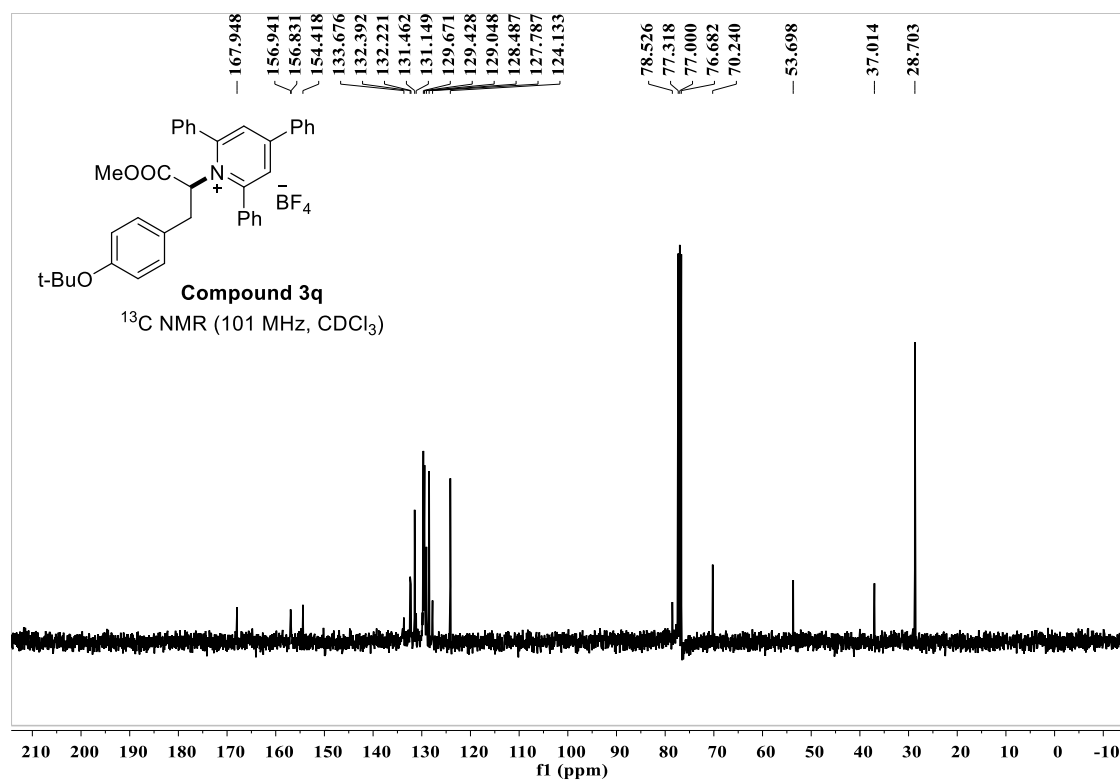

**1-(6-((Tert-butoxycarbonyl)amino)-1-methoxy-1-oxohexan-2-yl)-2,4,6-triphenylpyridin-1-ium tetrafluoroborate (3t).**

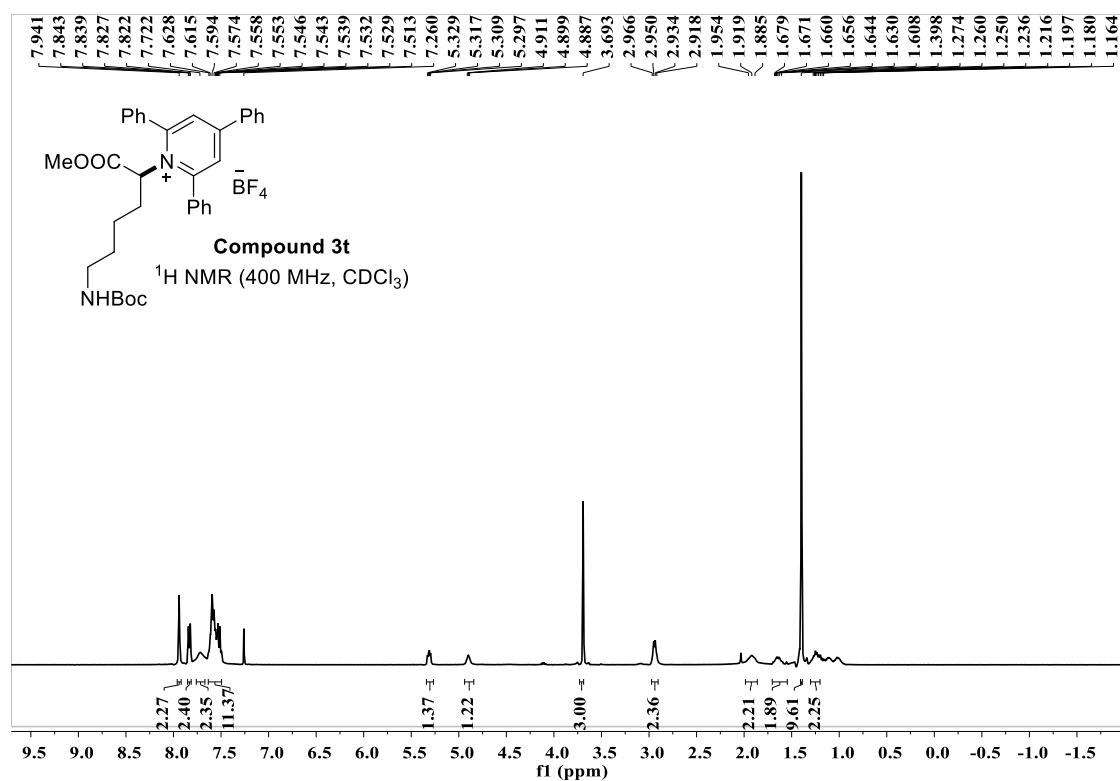

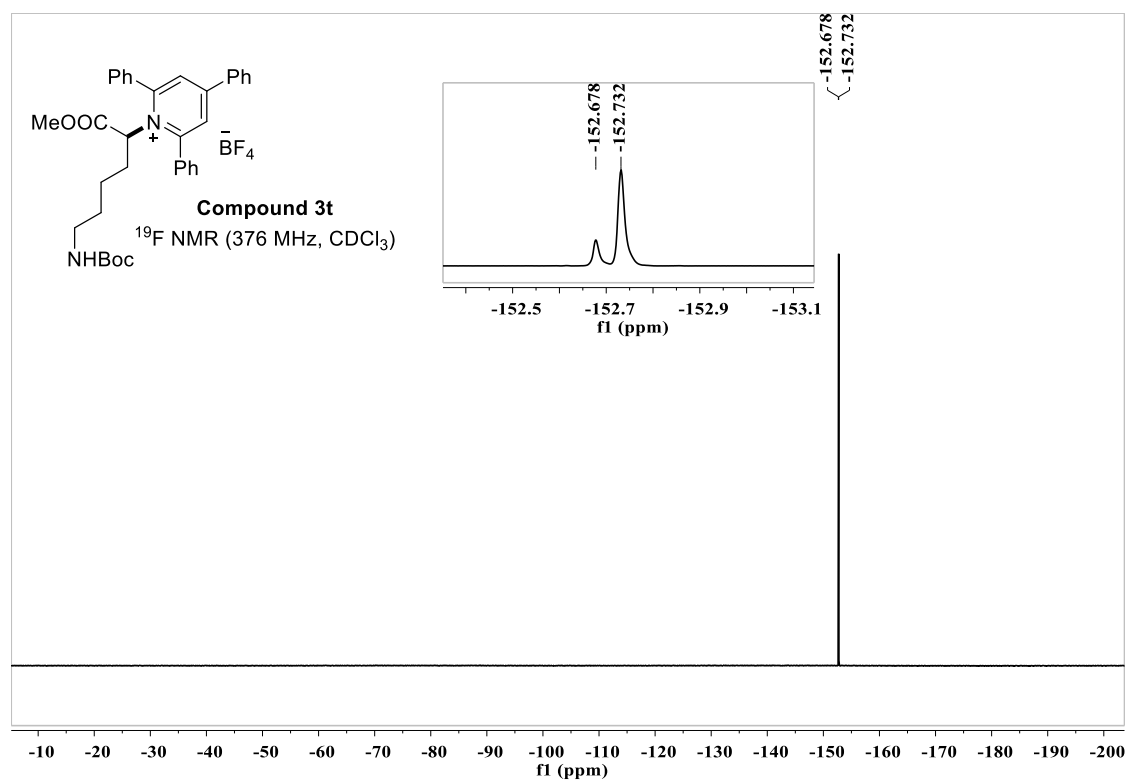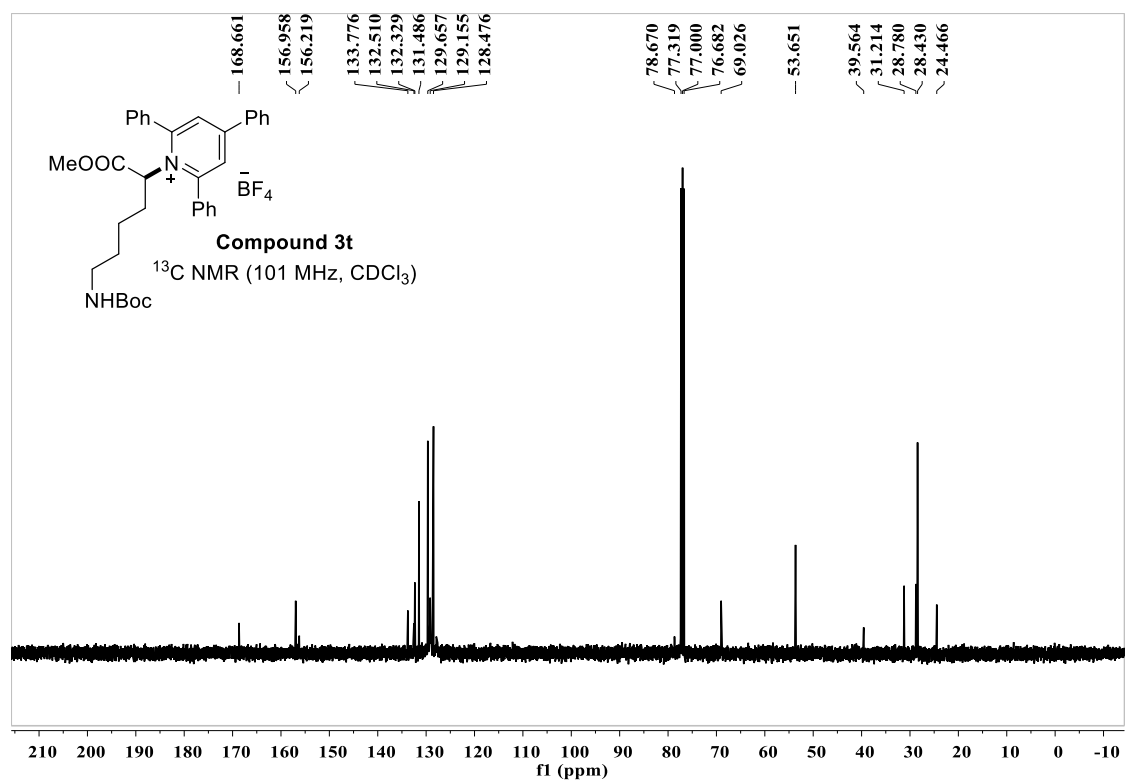

**2,4,6-Triphenyl-1-(2-(trifluoromethyl)benzyl)pyridin-1-ium tetrafluoroborate**  
**(3x).**

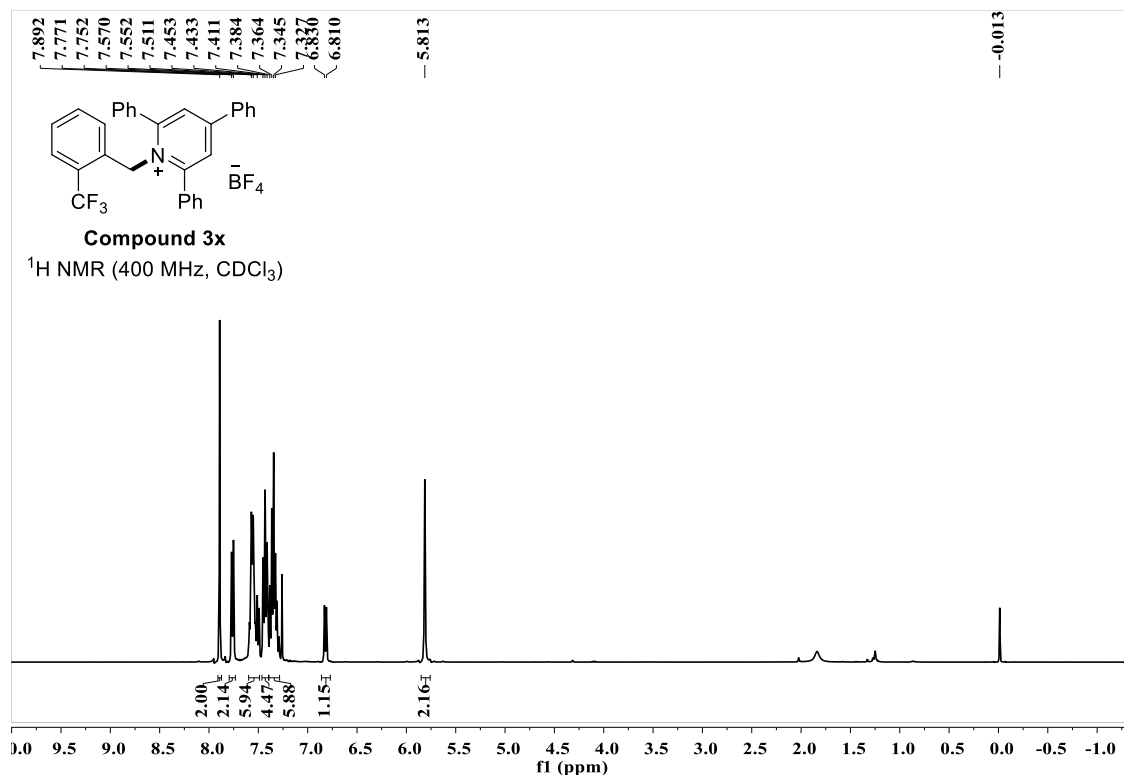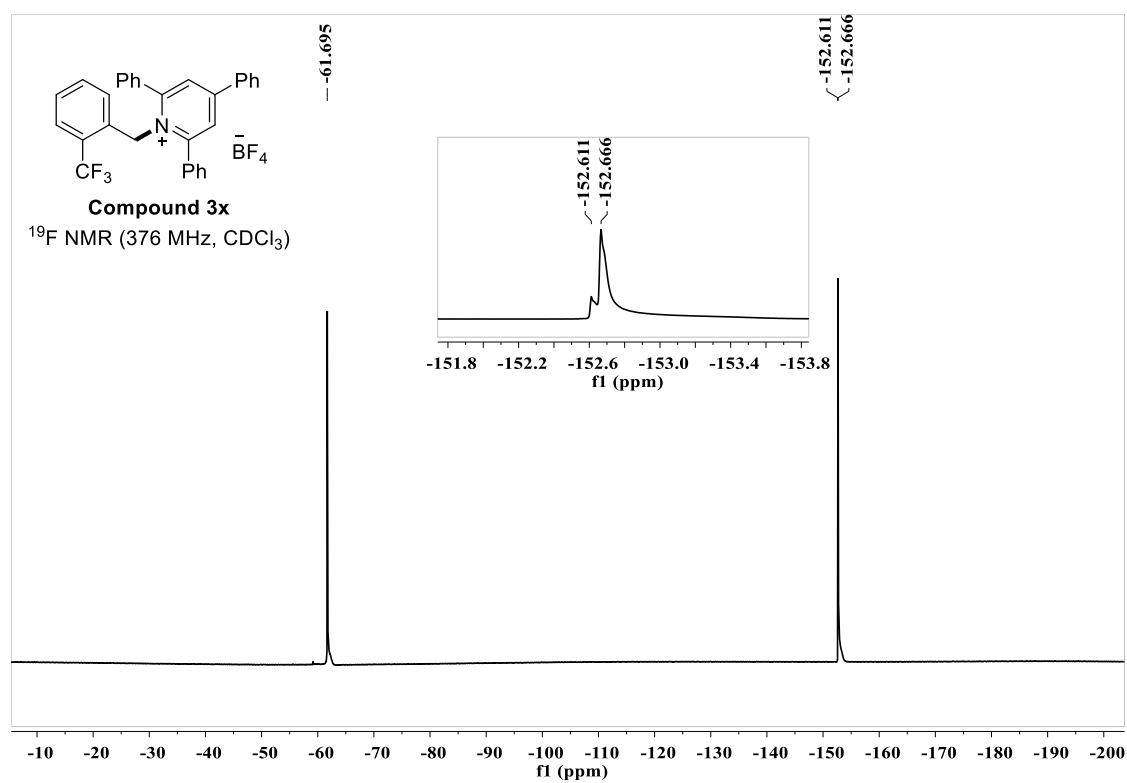

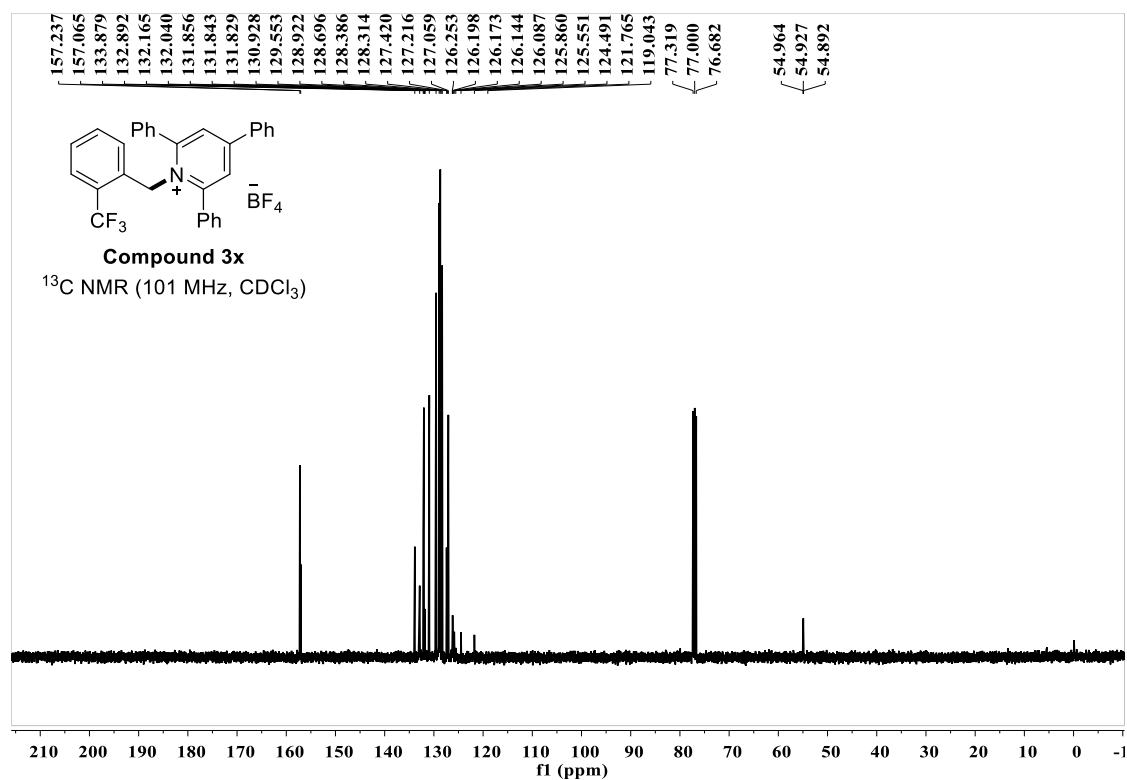

**1-(2-Methylbenzyl)-2,4,6-triphenylpyridin-1-ium tetrafluoroborate (3y) .**

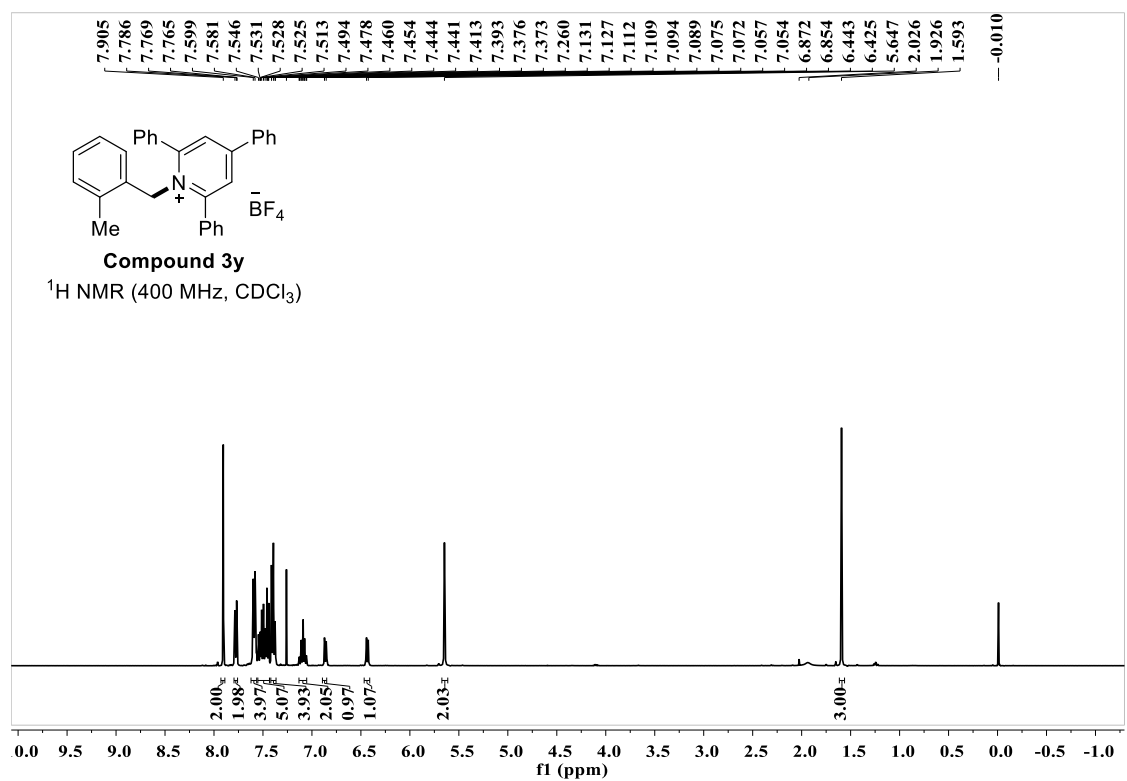

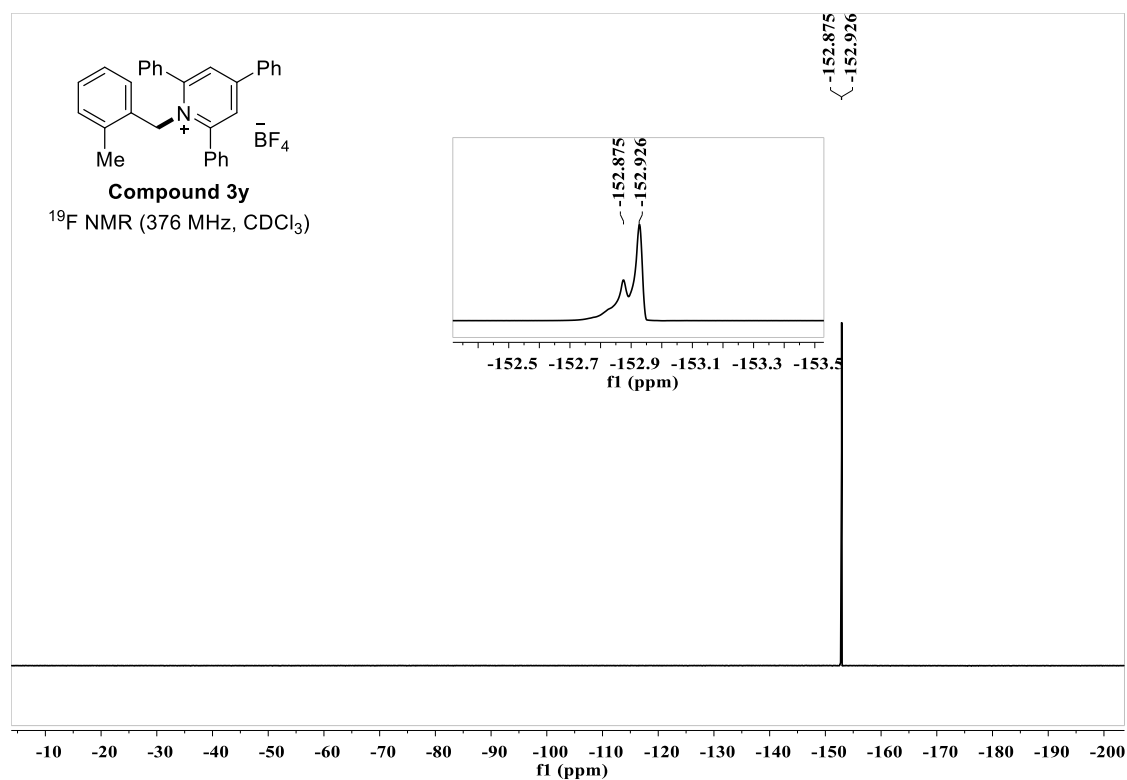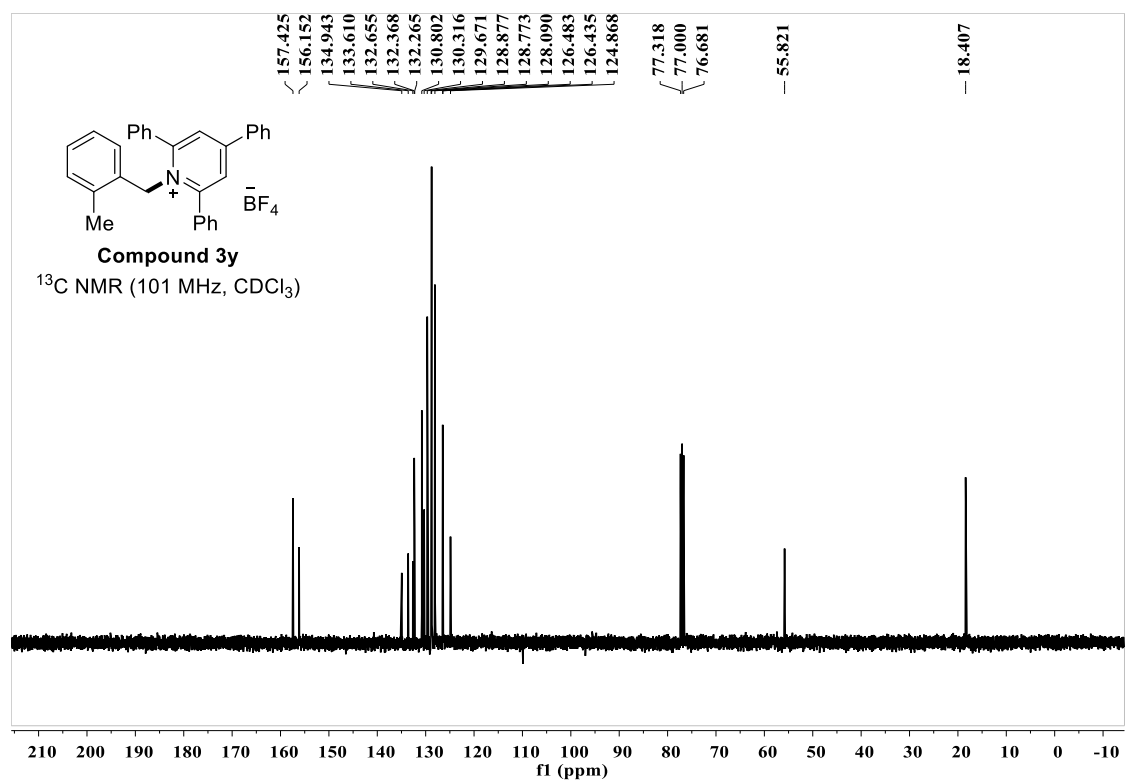

**2,4,6-Triphenyl-1-(1-(pyridin-3-yl)ethyl)pyridin-1-ium tetrafluoroborate (3ah).**

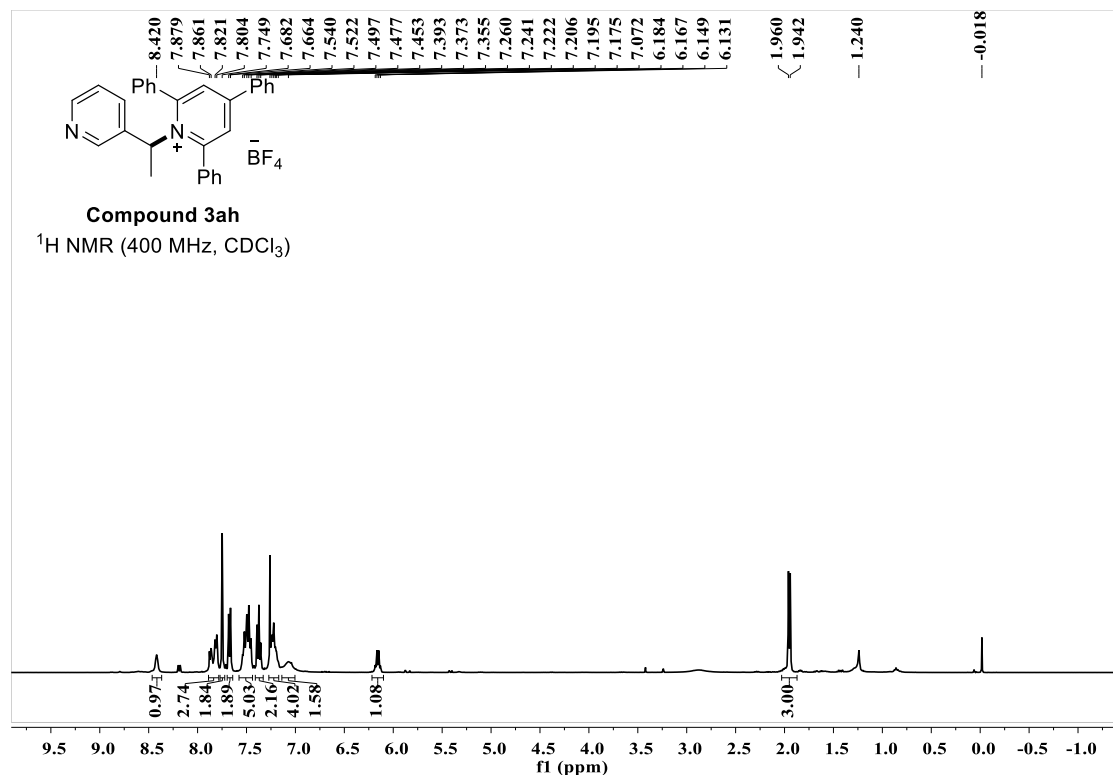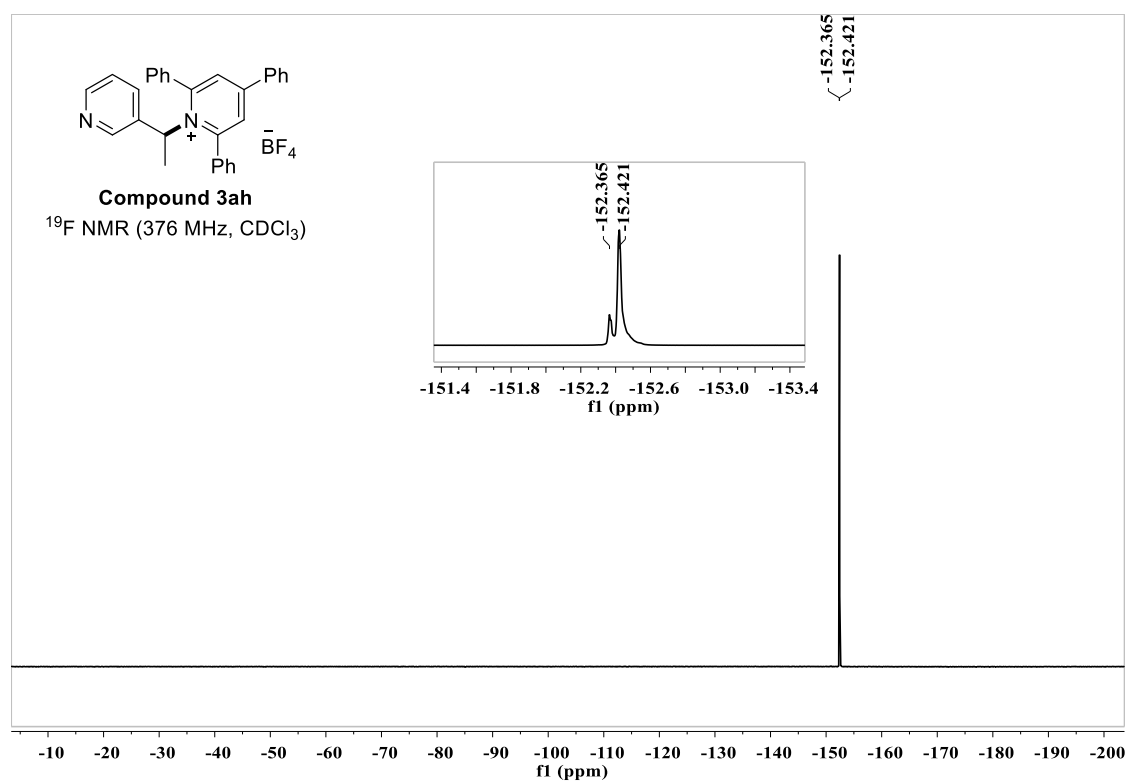

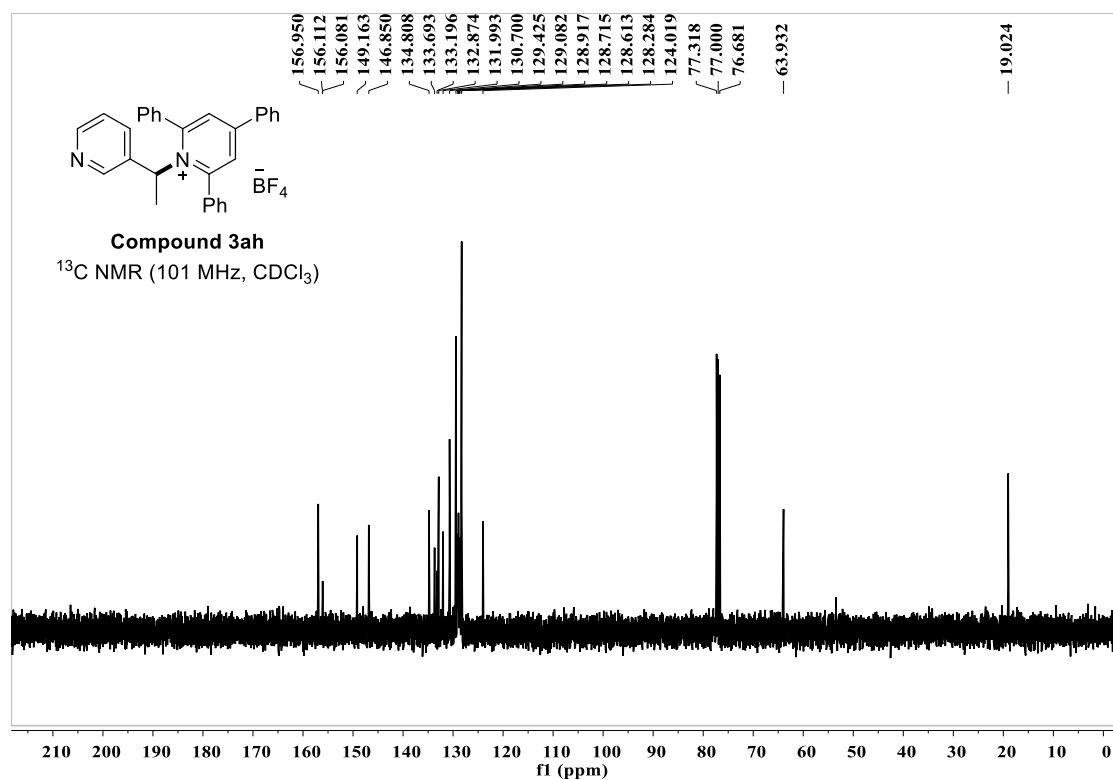

#### Difluoroenoxytriethylsilane (4).

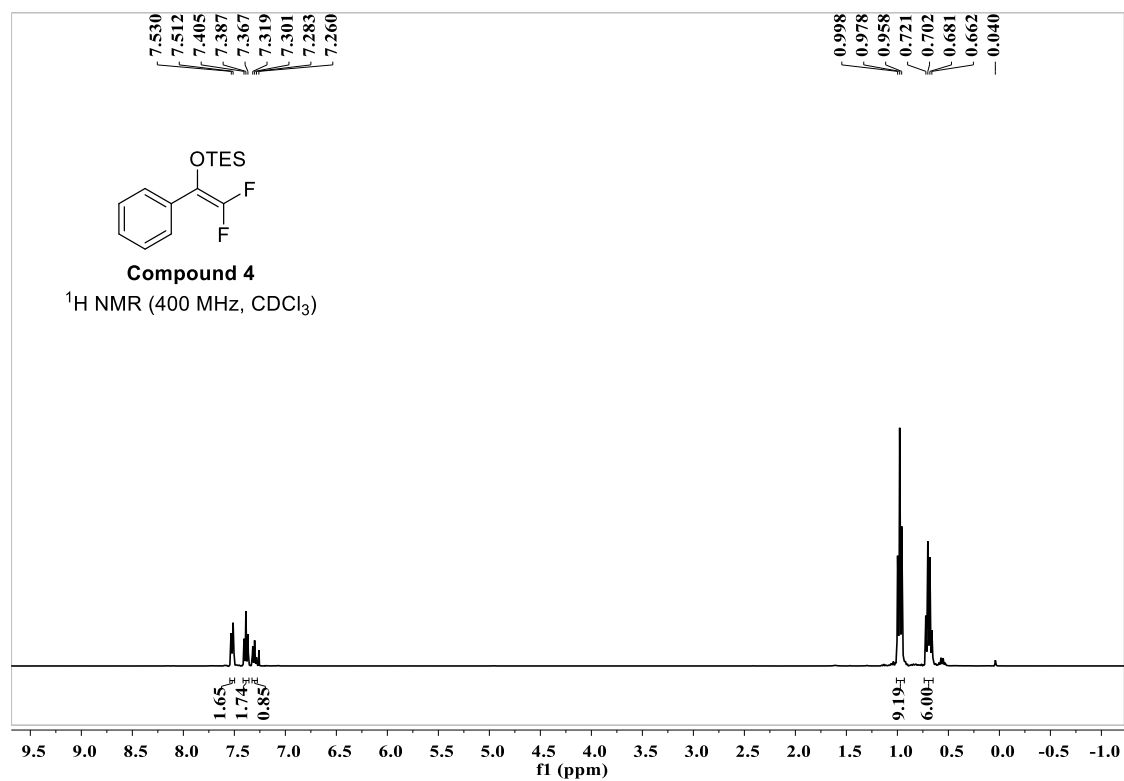



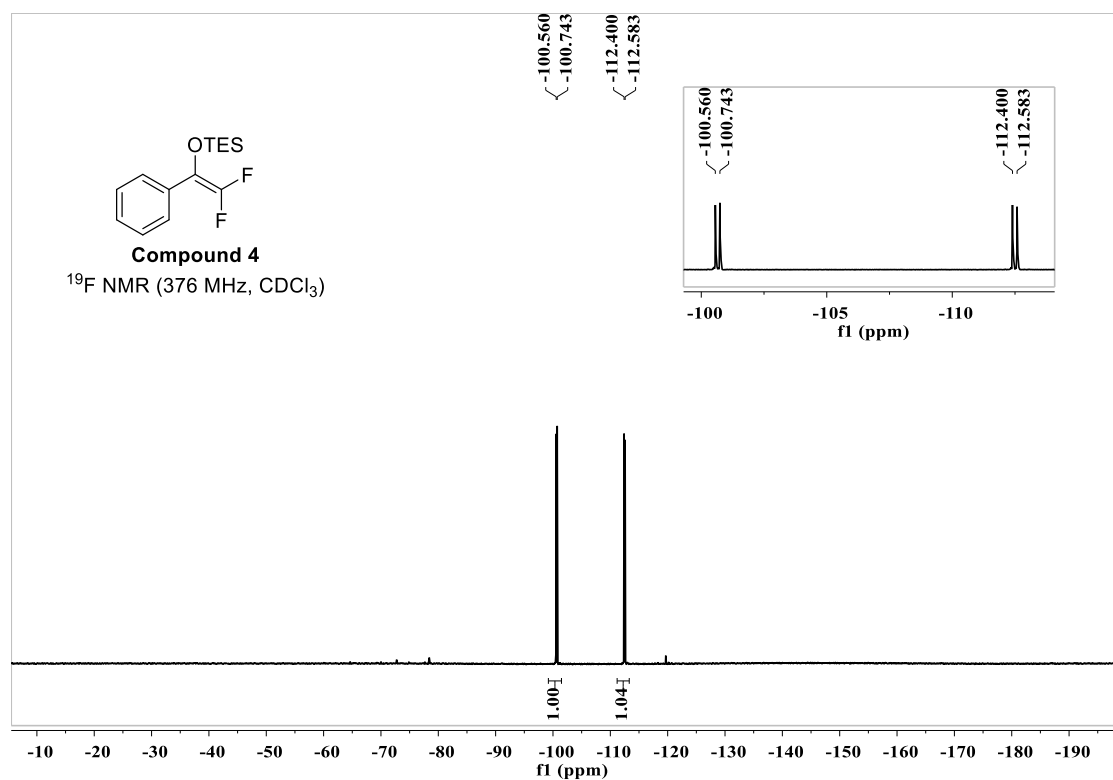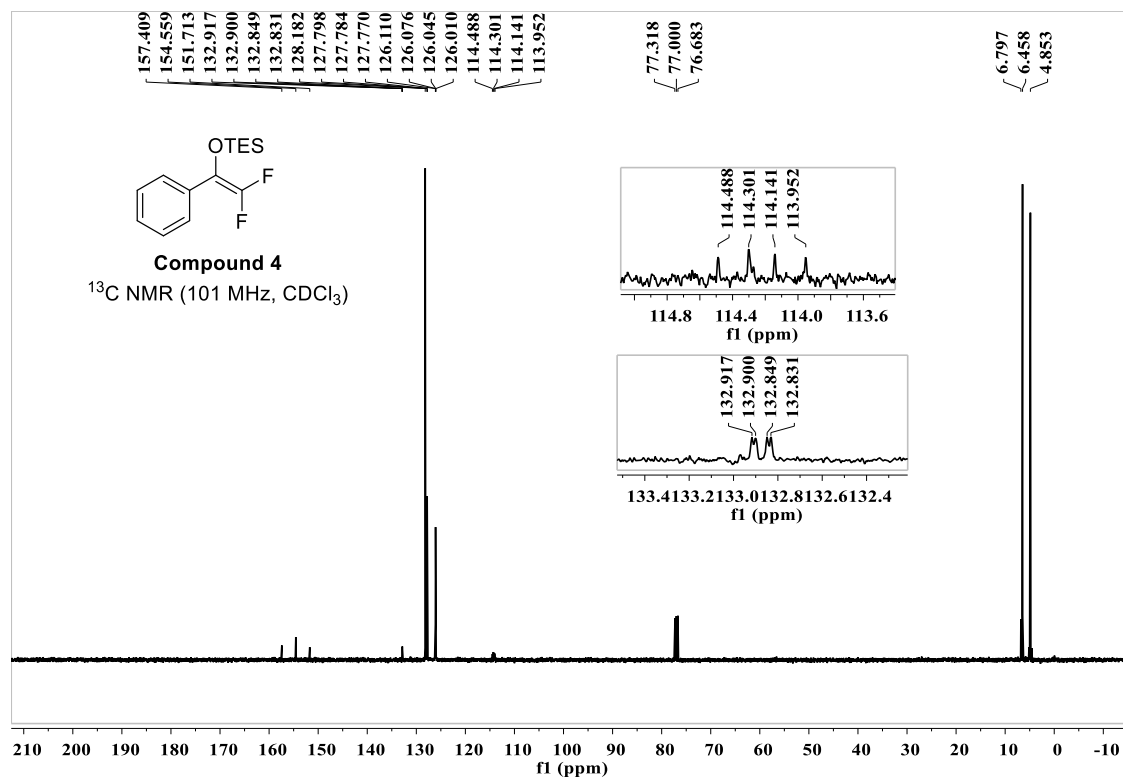

## 2-Cyclohexyl-2,2-difluoro-1-phenylethan-1-one (5a)

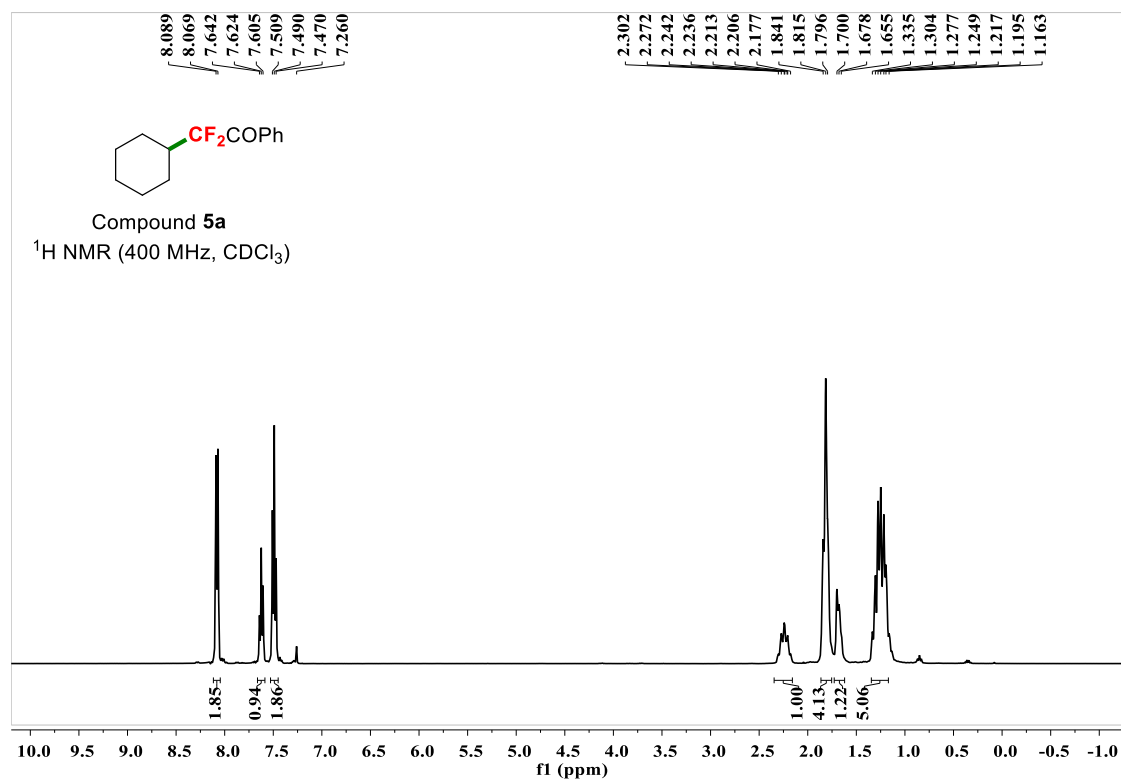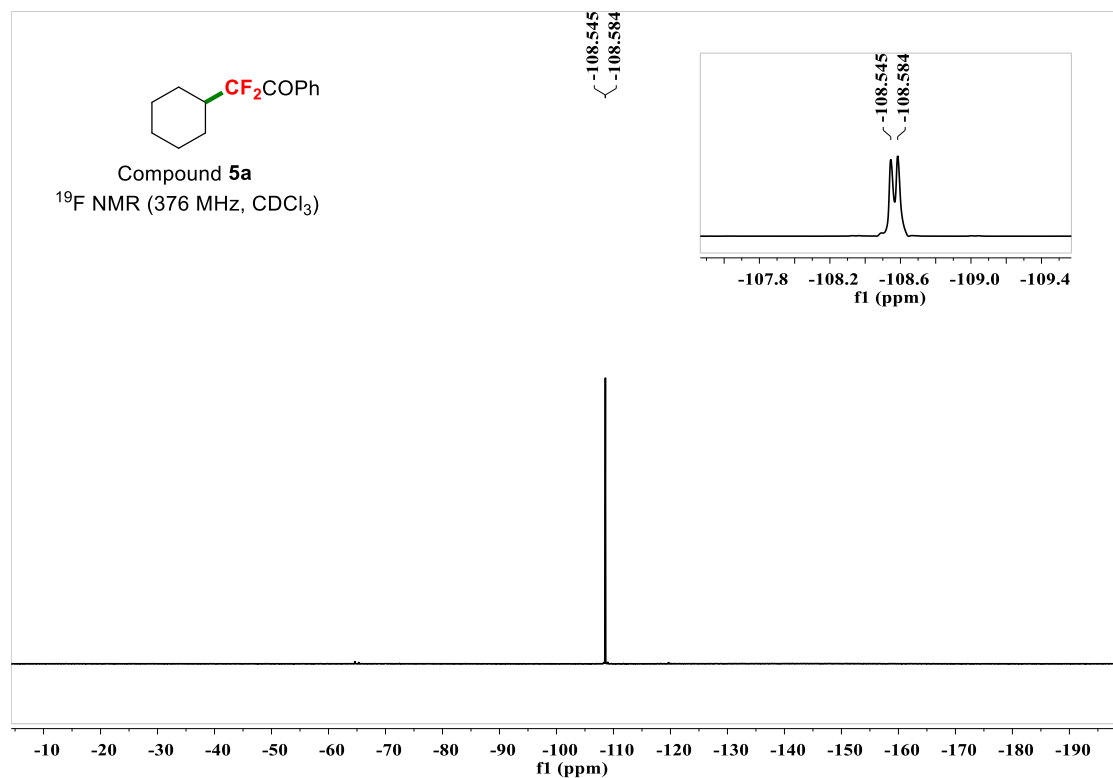

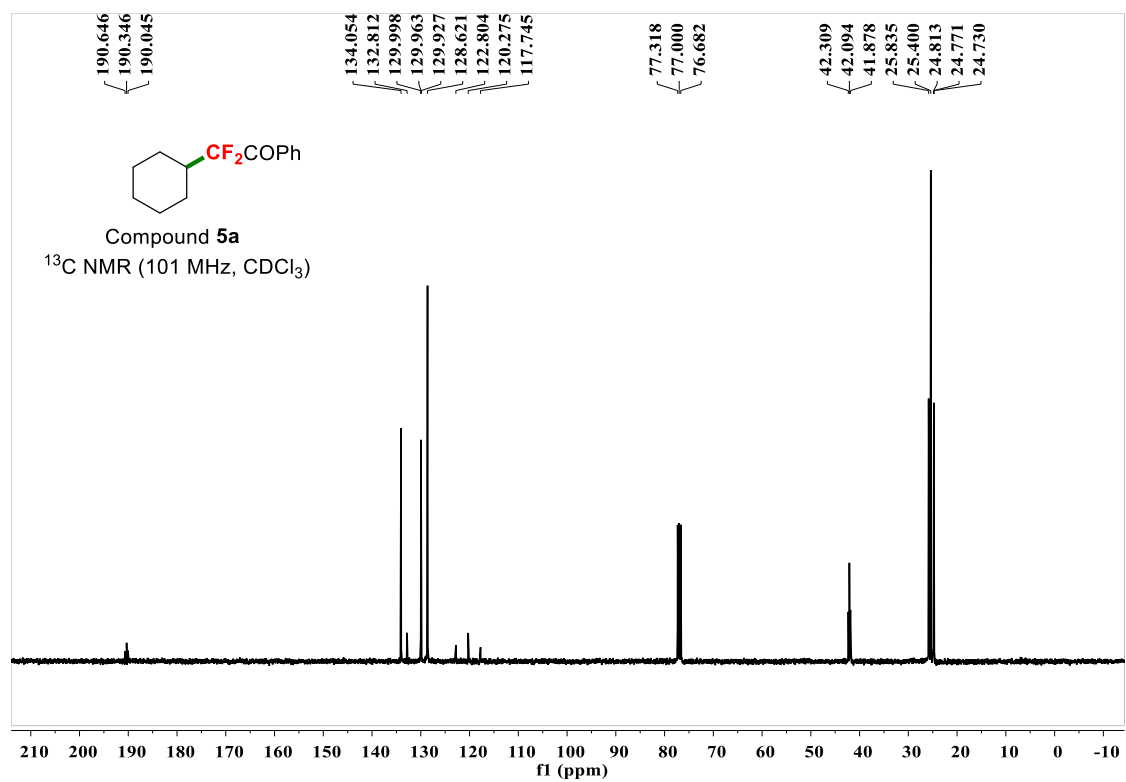

## 2-Cyclopentyl-2,2-difluoro-1-phenylethan-1-one (5b)

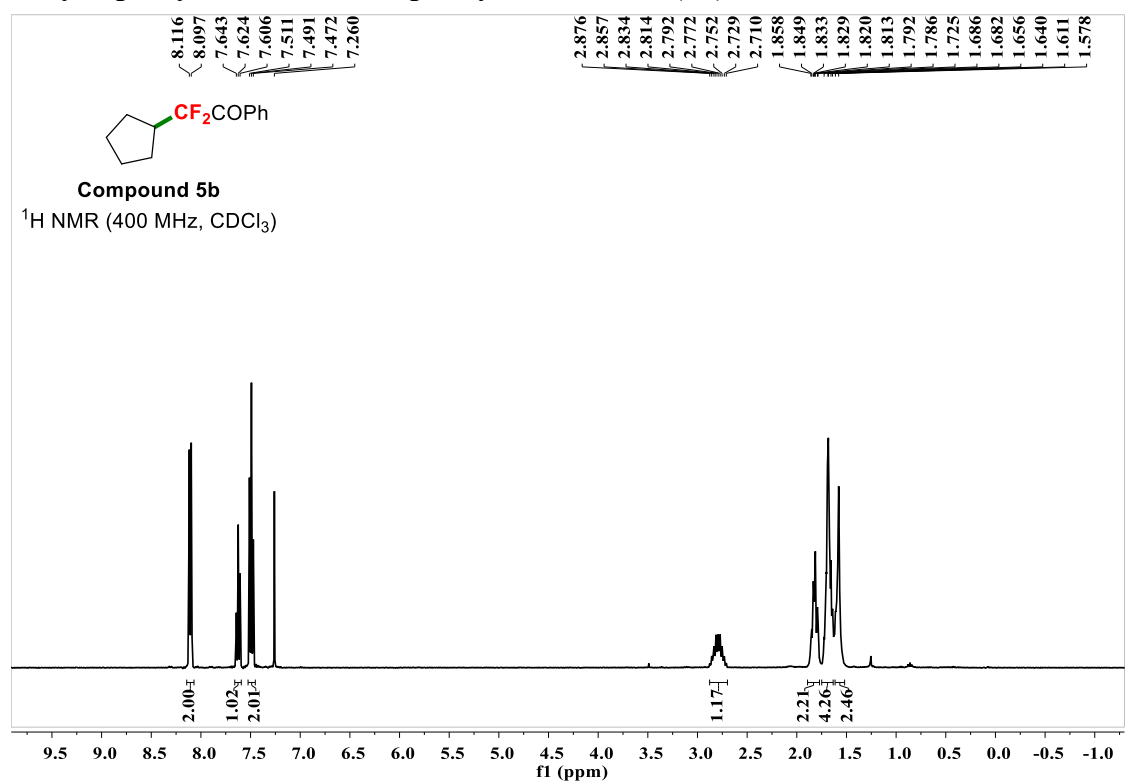

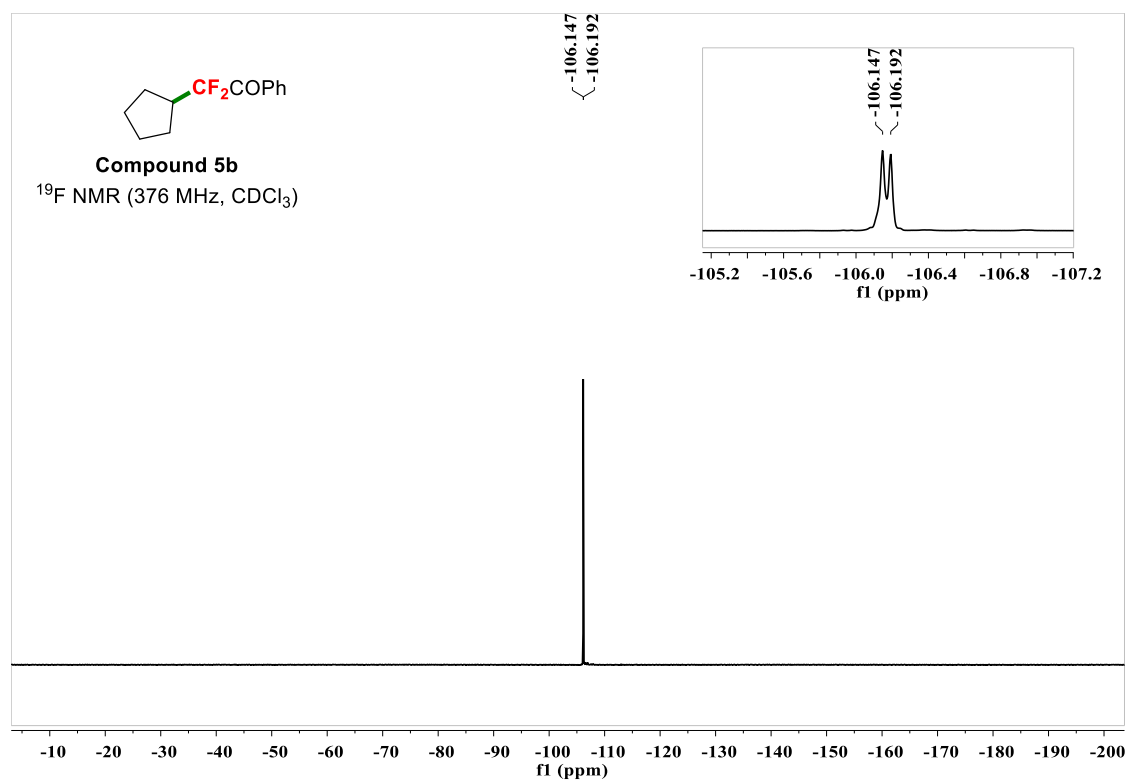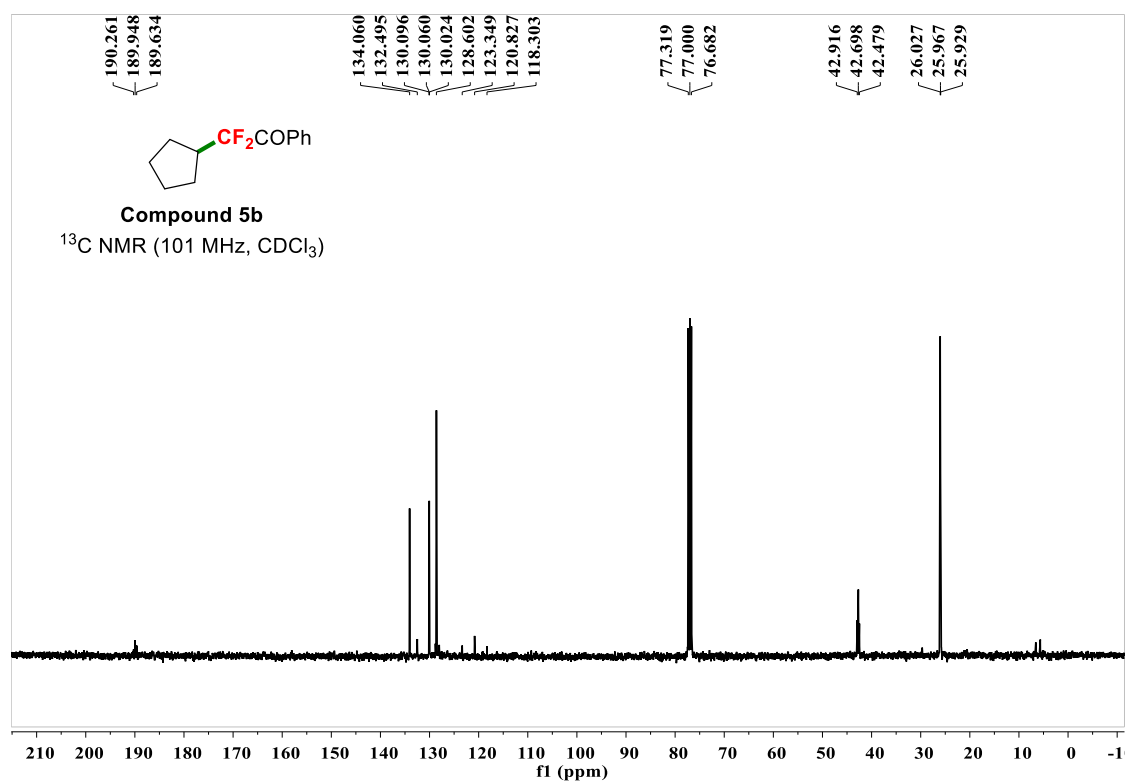

**2-(2,3-Dihydro-1H-inden-2-yl)-2,2-difluoro-1-phenylethan-1-one (5c).**

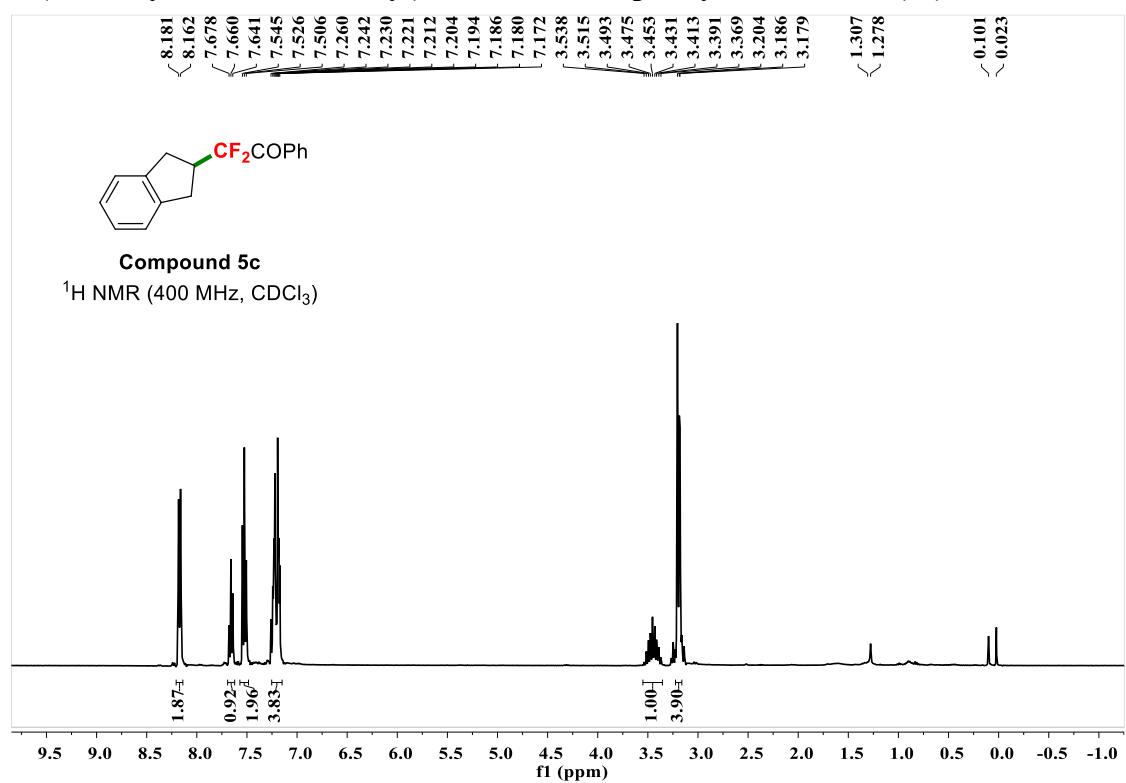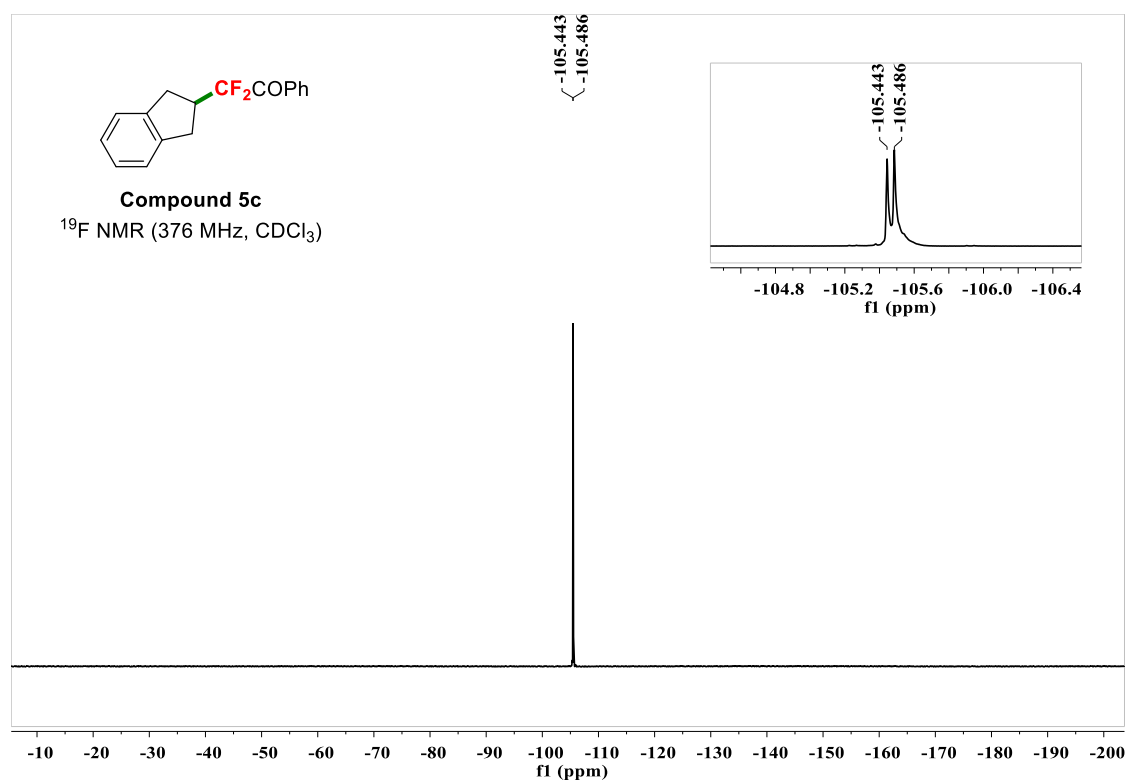



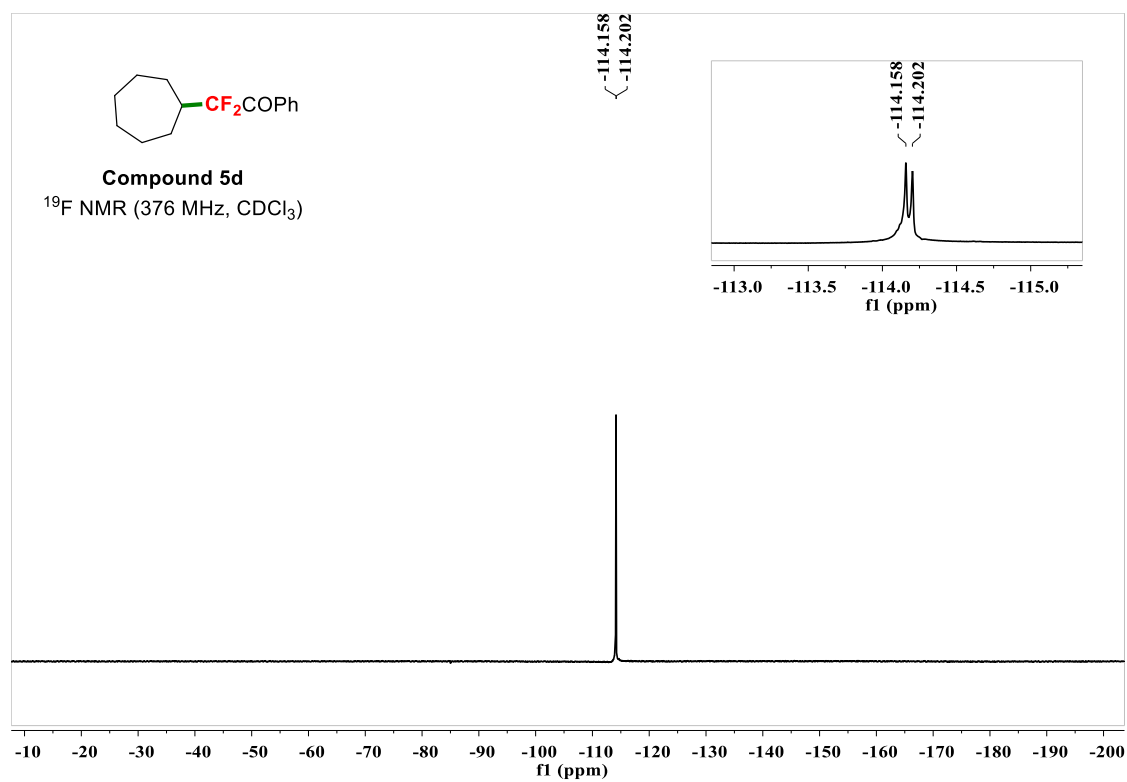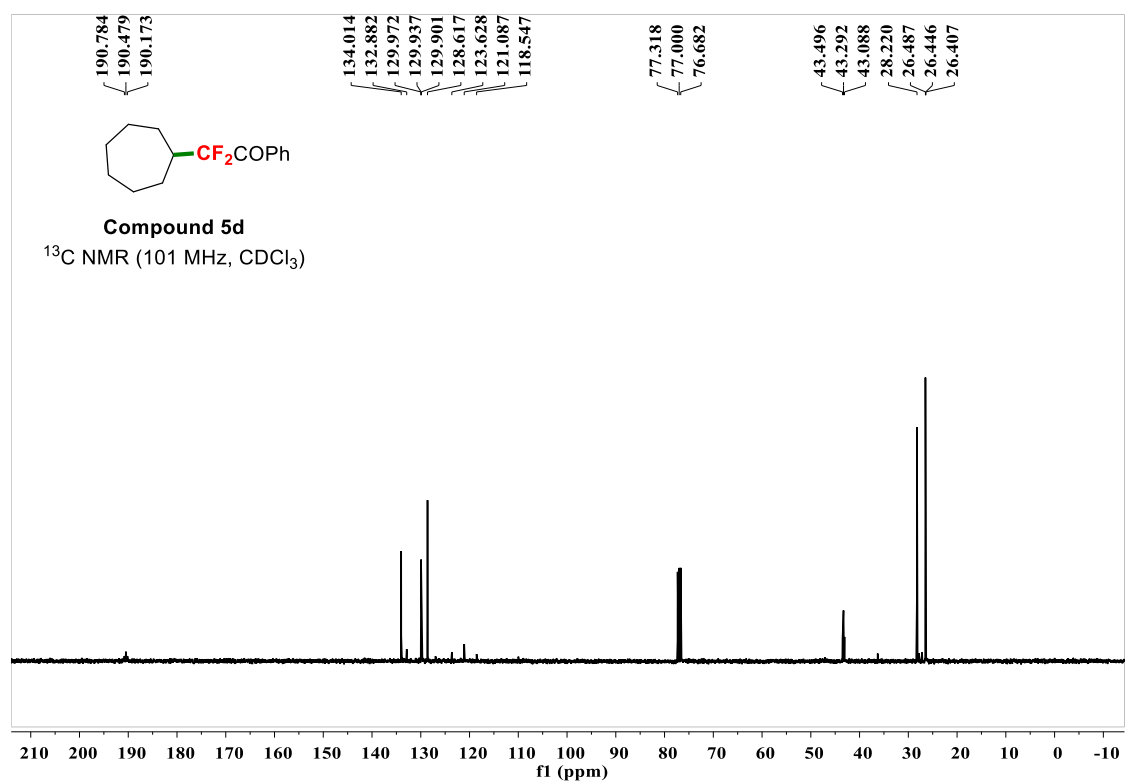

## 2-Cyclododecyl-2,2-difluoro-1-phenylethan-1-one (5e).

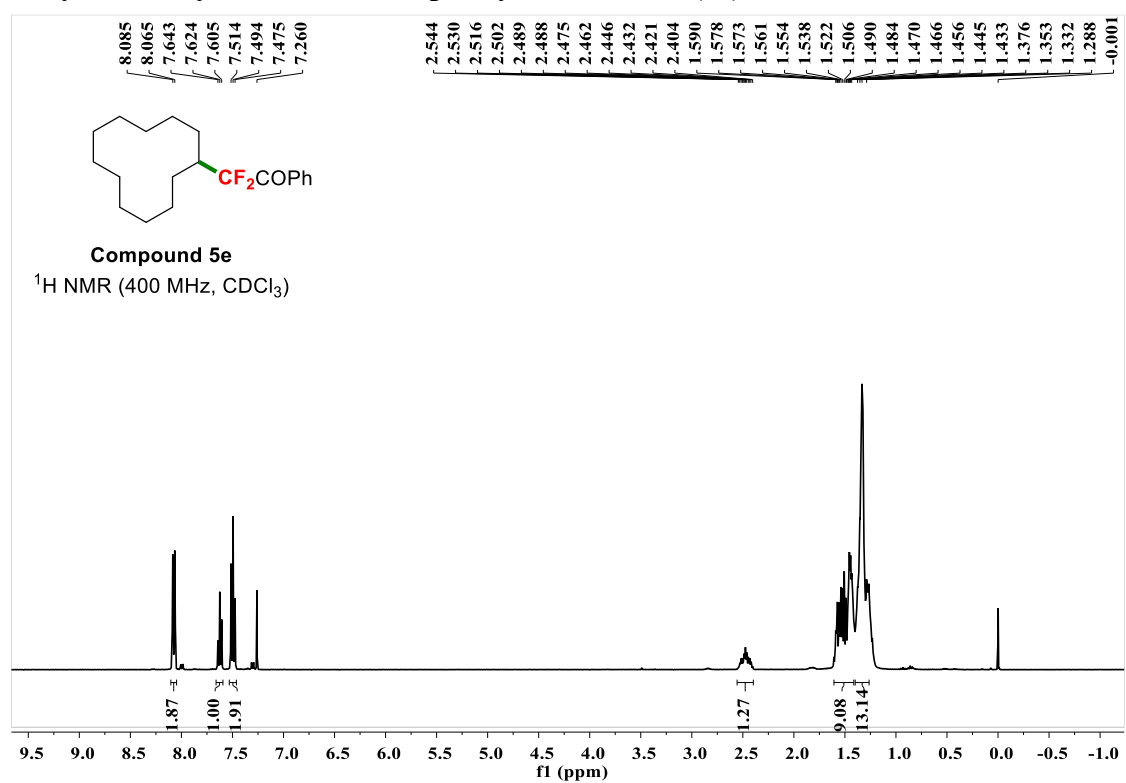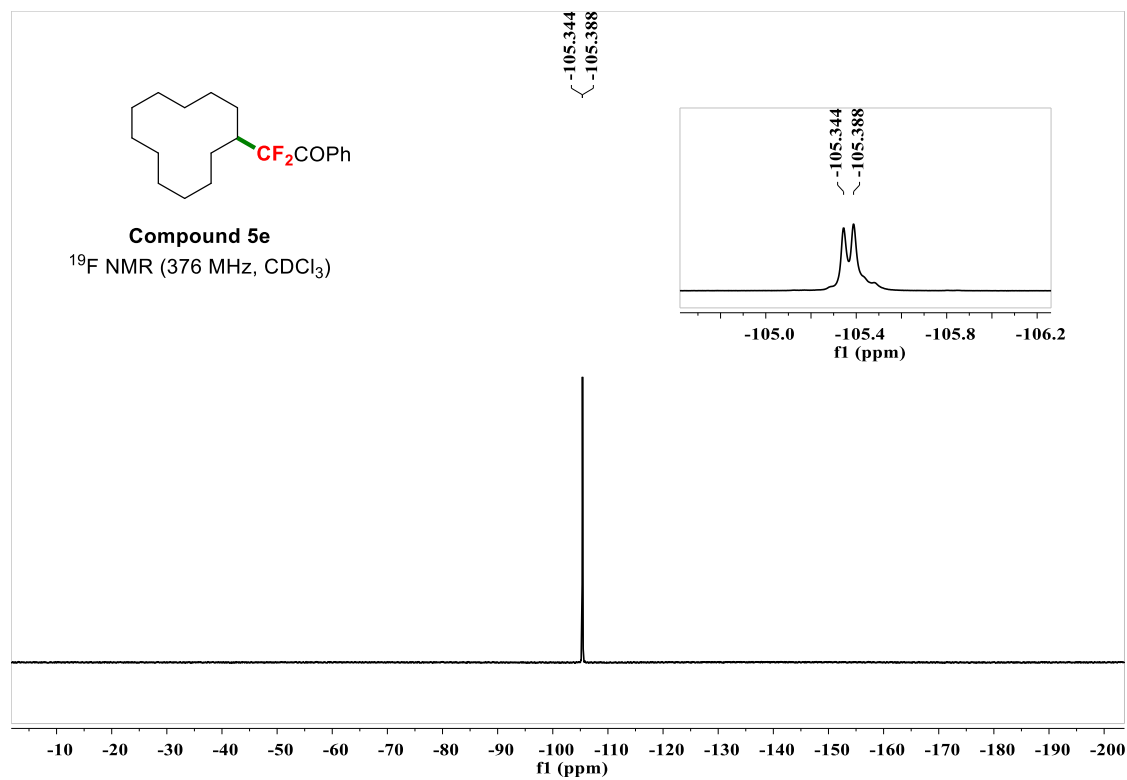



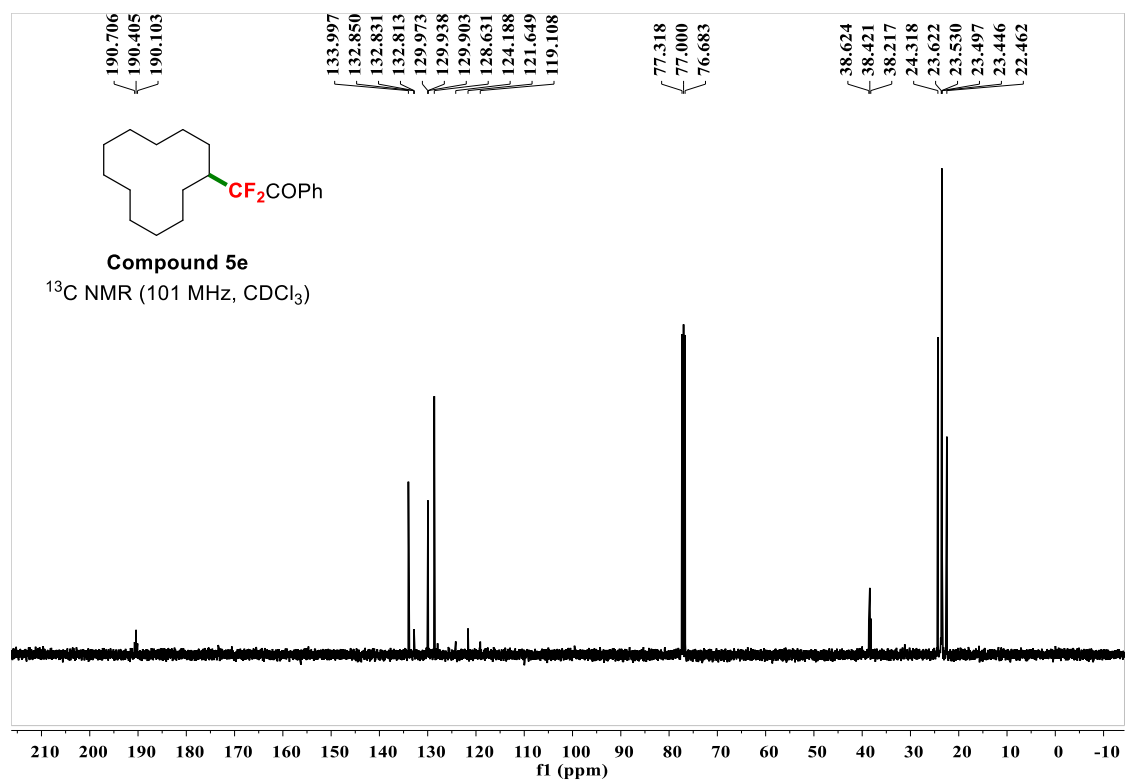

## 2-Cyclooctyl-2,2-difluoro-1-phenylethan-1-one (5f)

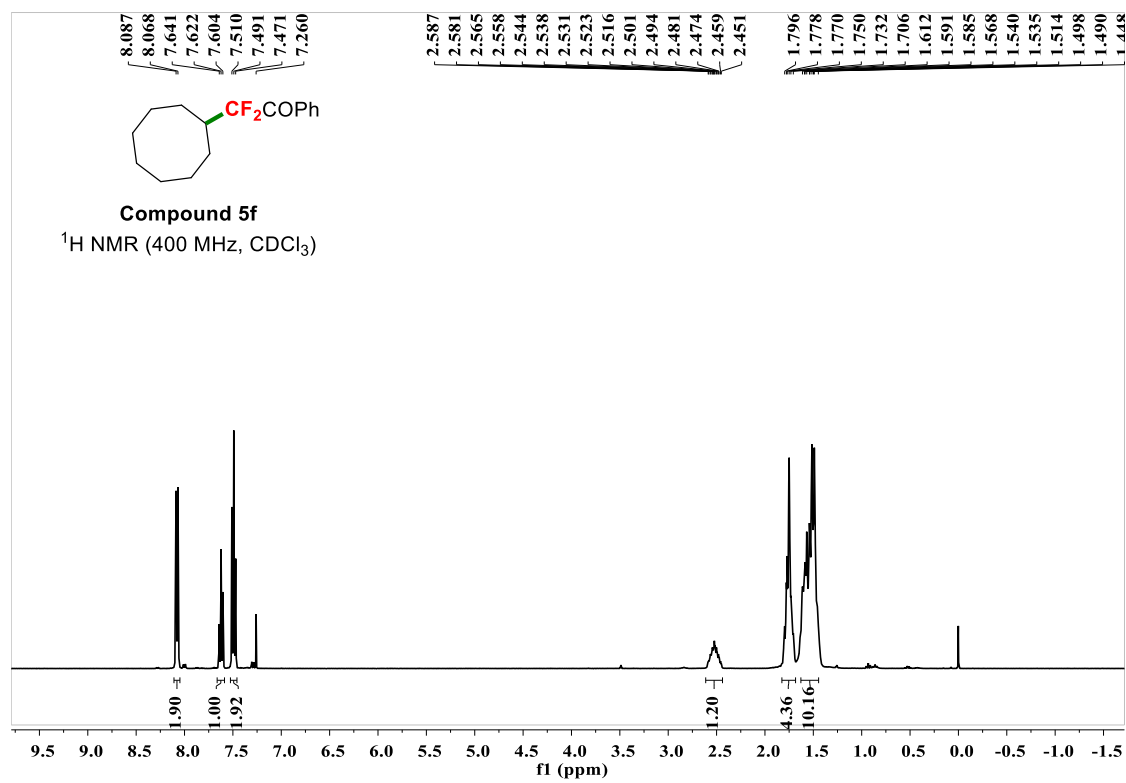

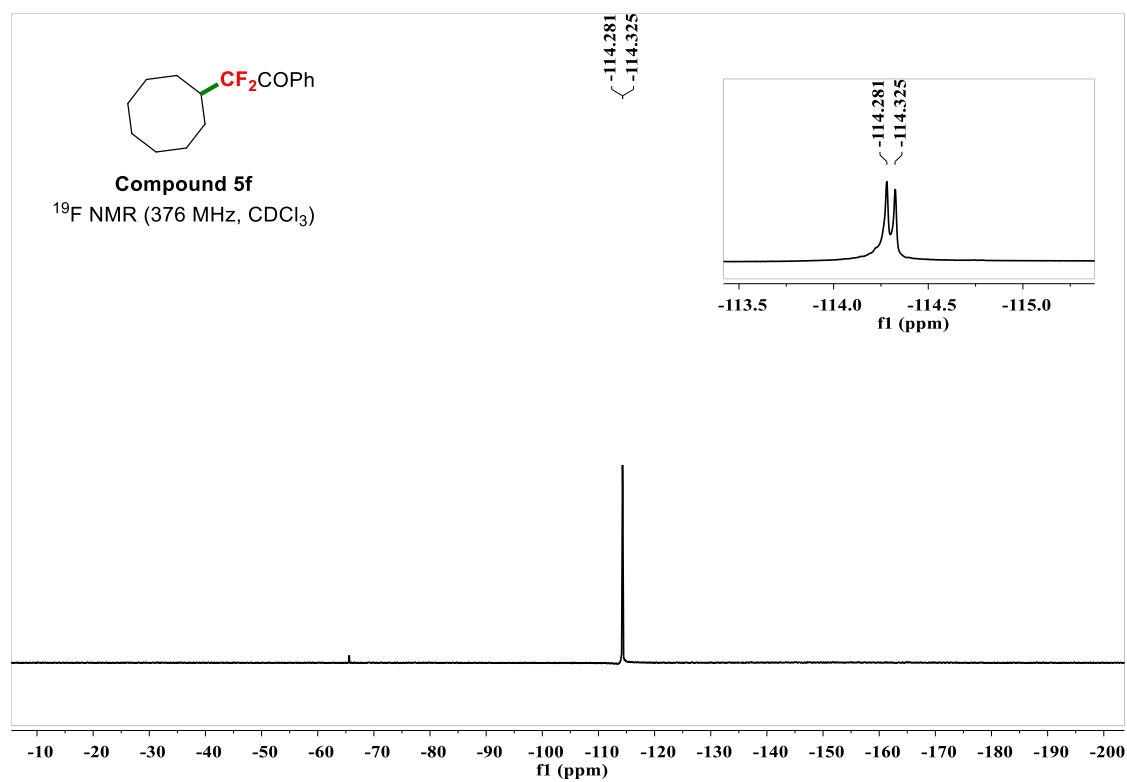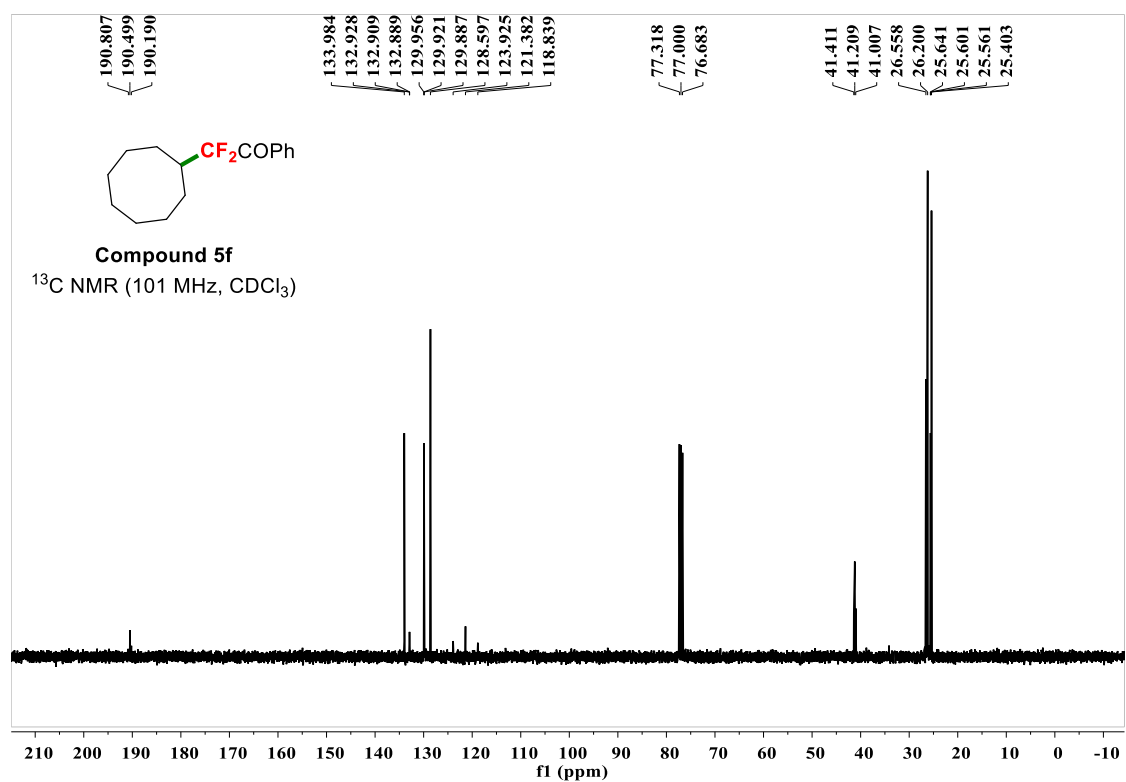

**2-(4,4-Difluorocyclohexyl)-2,2-difluoro-1-phenylethan-1-one (5g).**

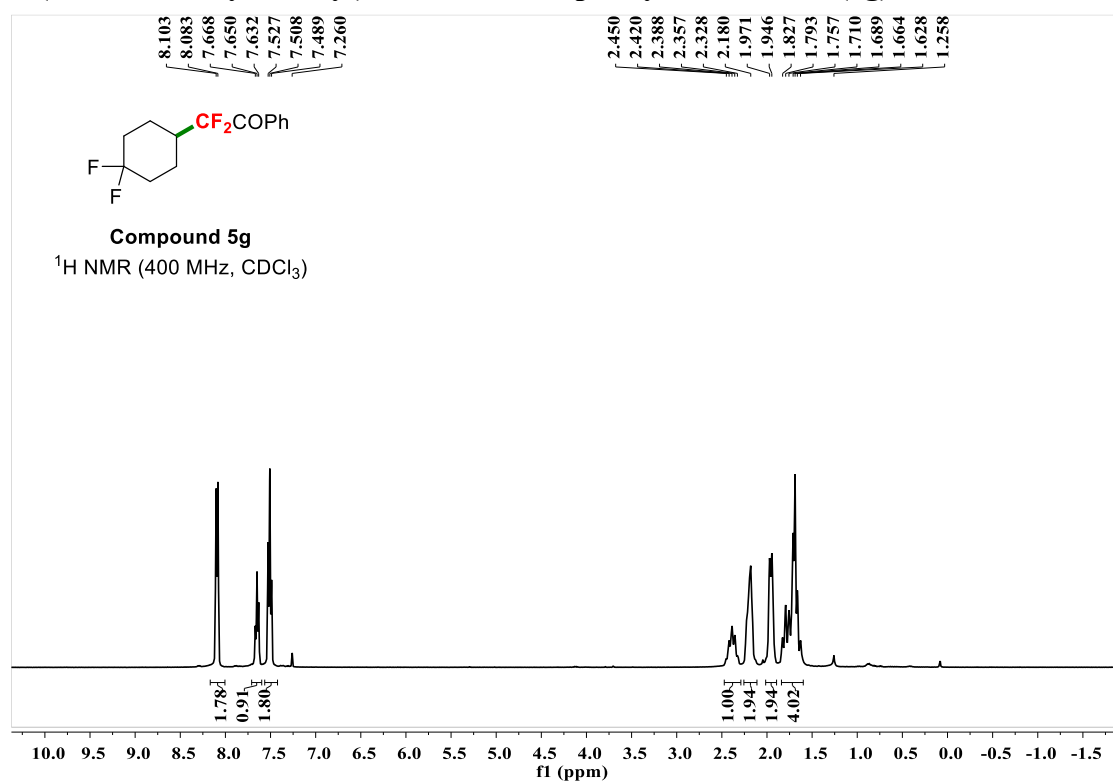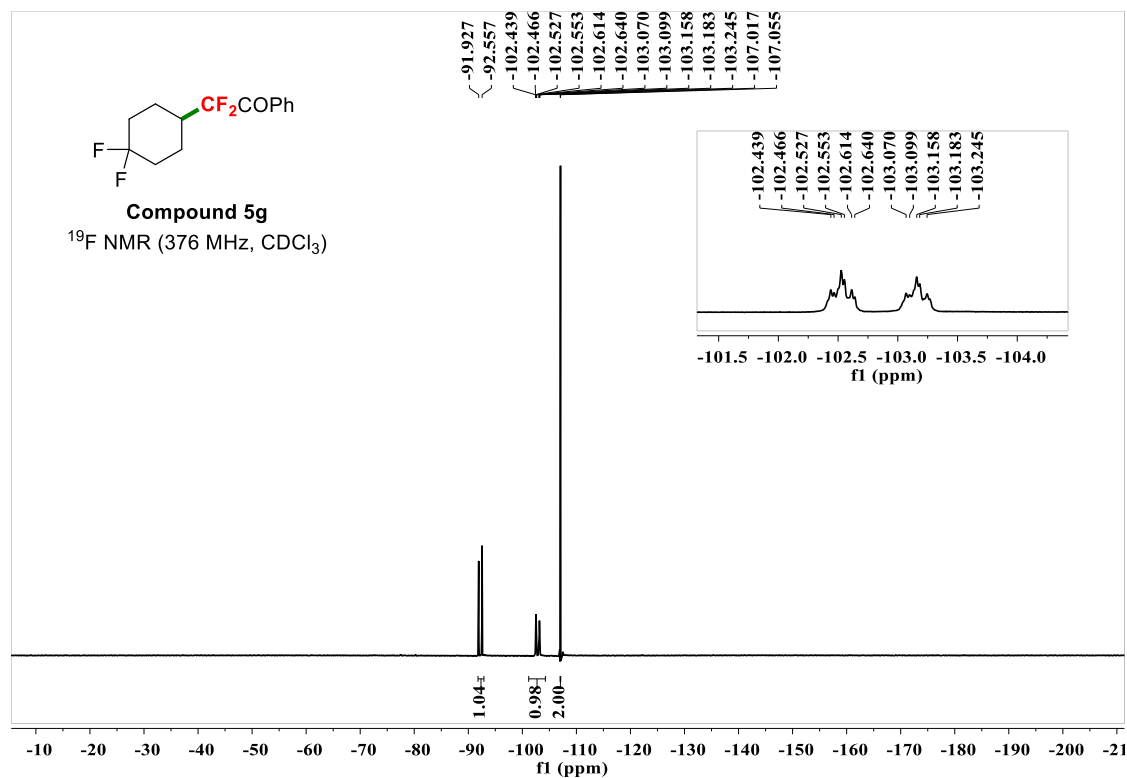

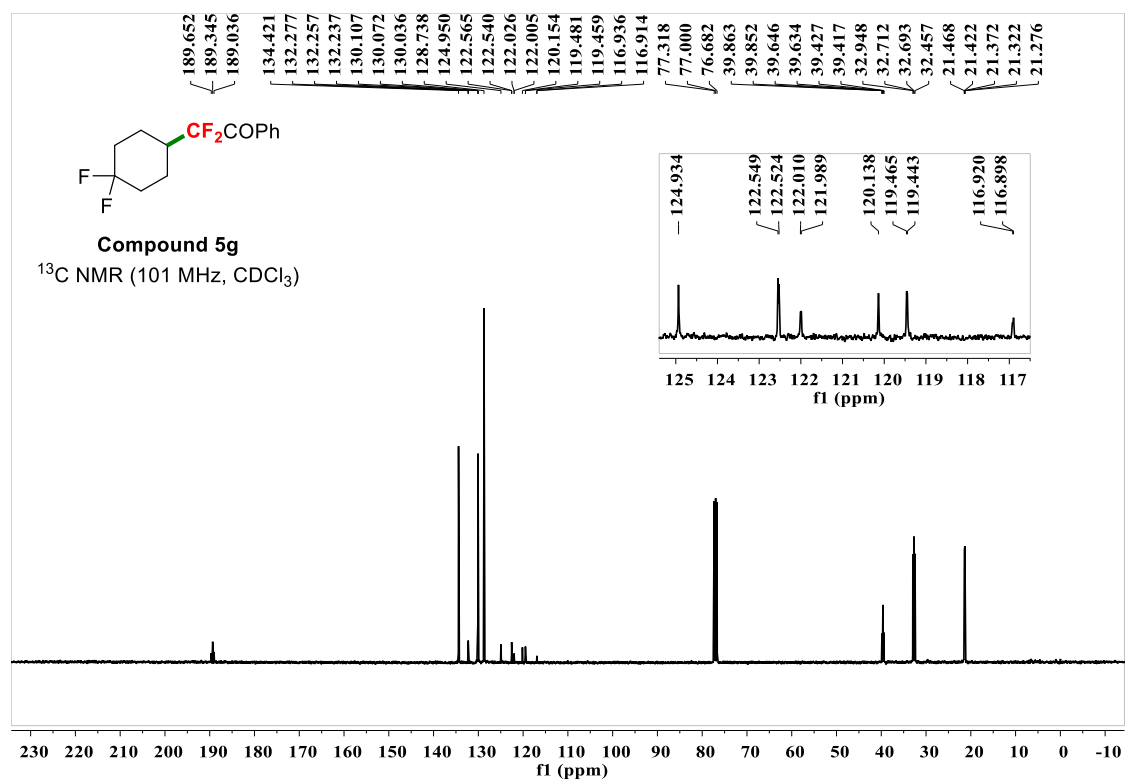

**Tert-butyl (4-(1,1-difluoro-2-oxo-2-phenylethyl)cyclohexyl)carbamate (5h).**

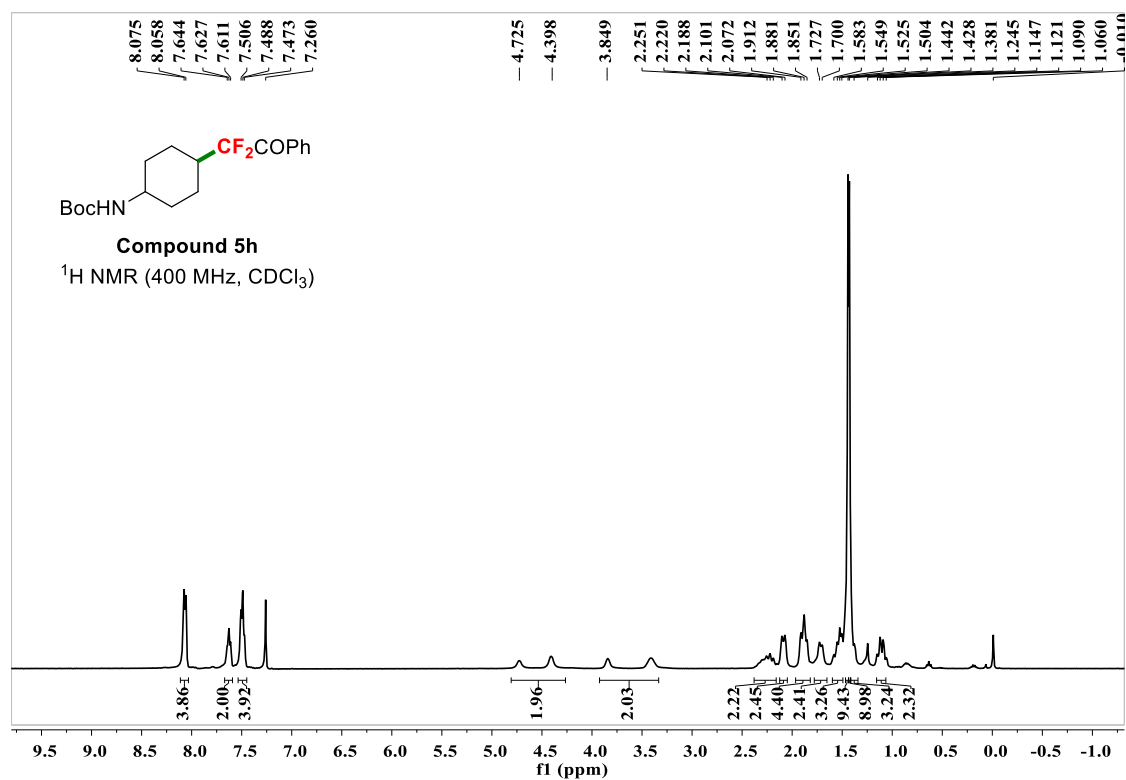

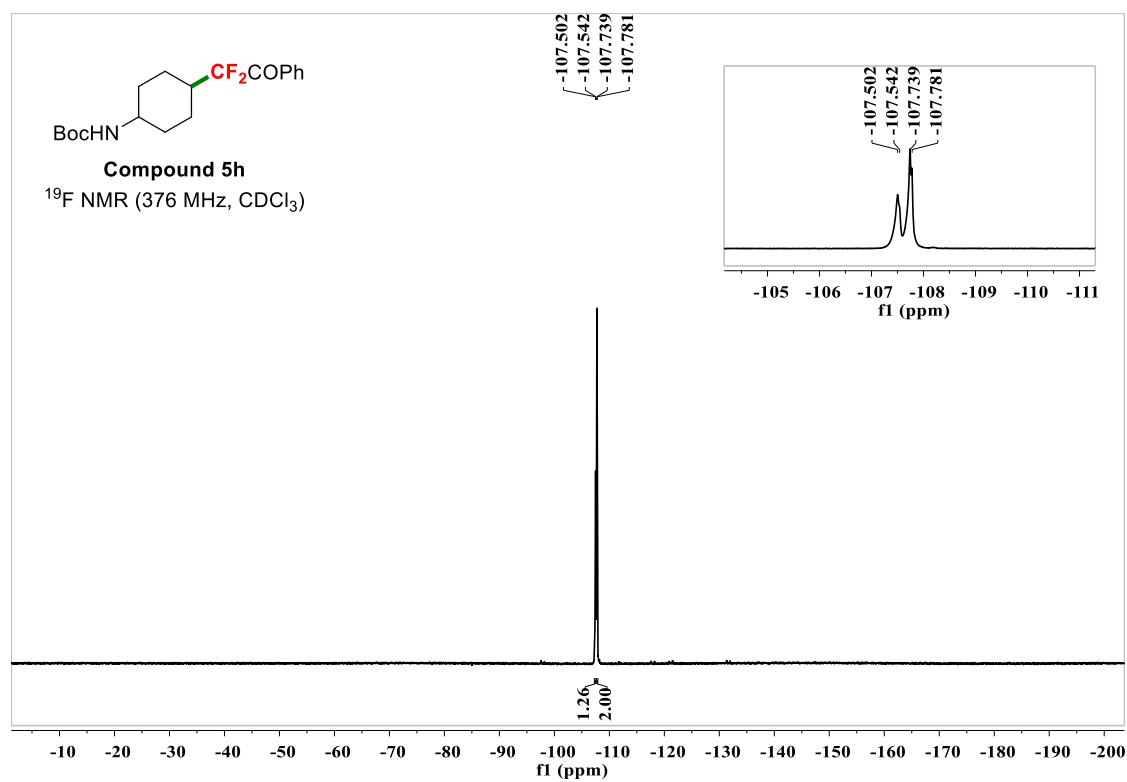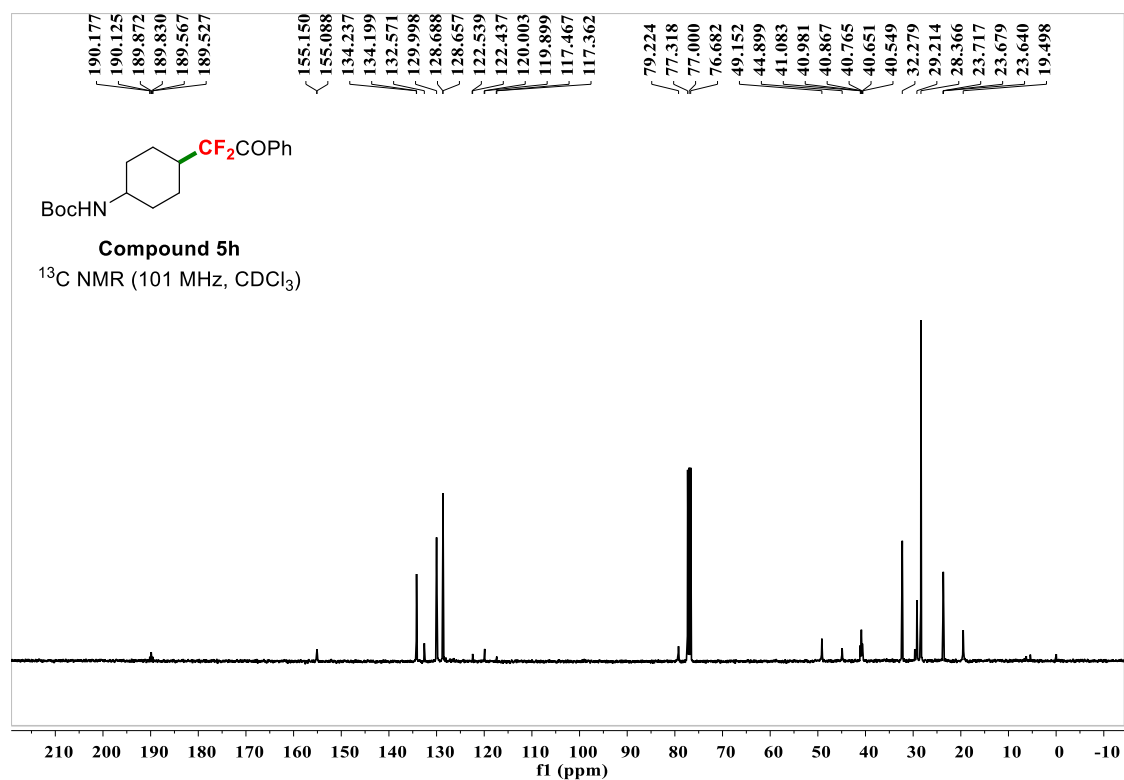

**Tert-butyl 4-(1,1-difluoro-2-oxo-2-phenylethyl)piperidine-1-carboxylate (5i).**

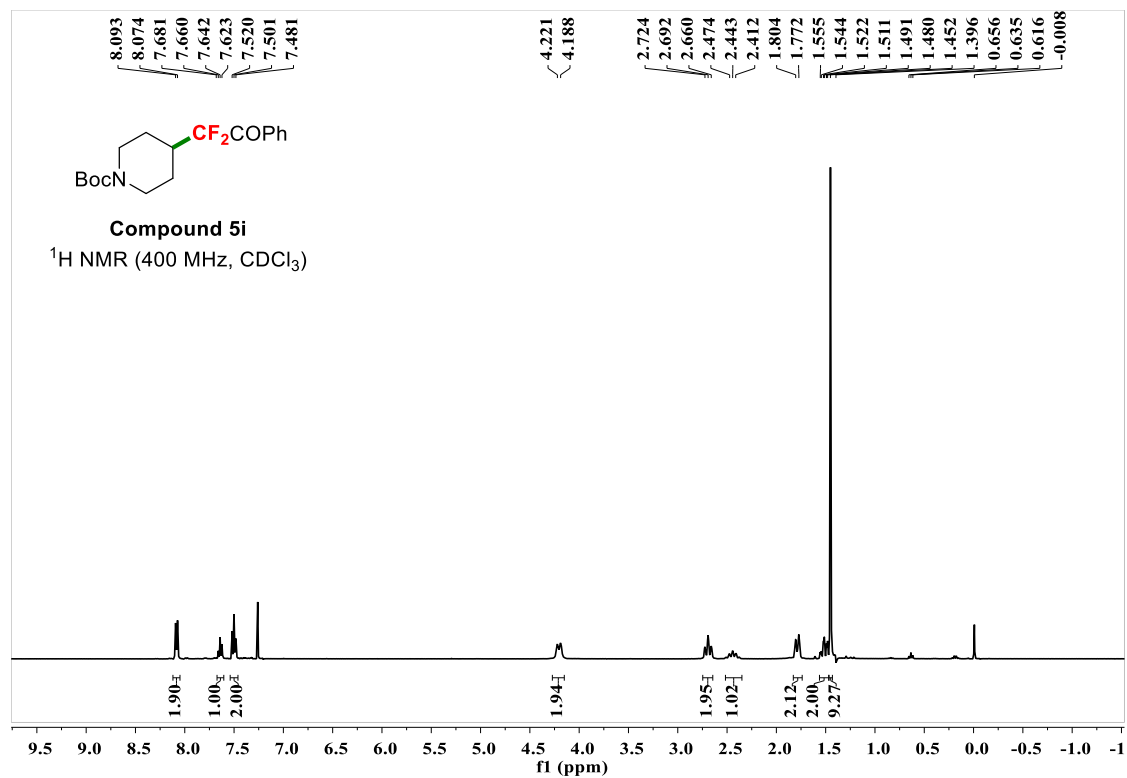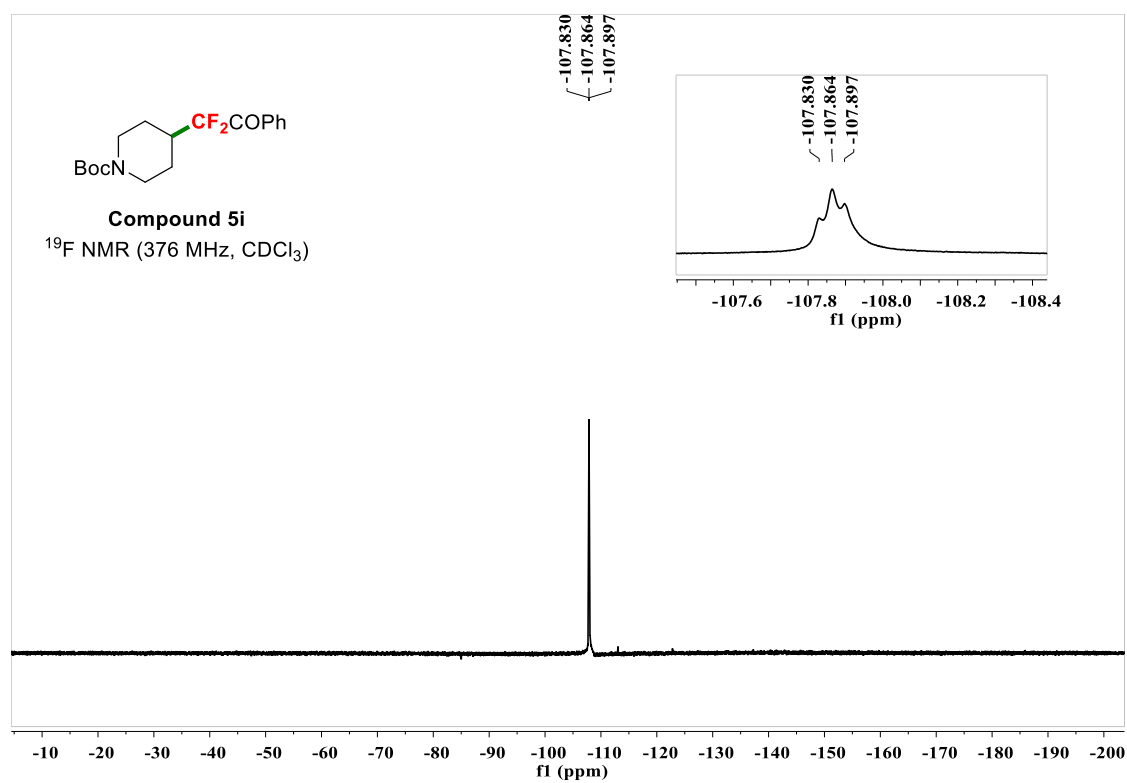

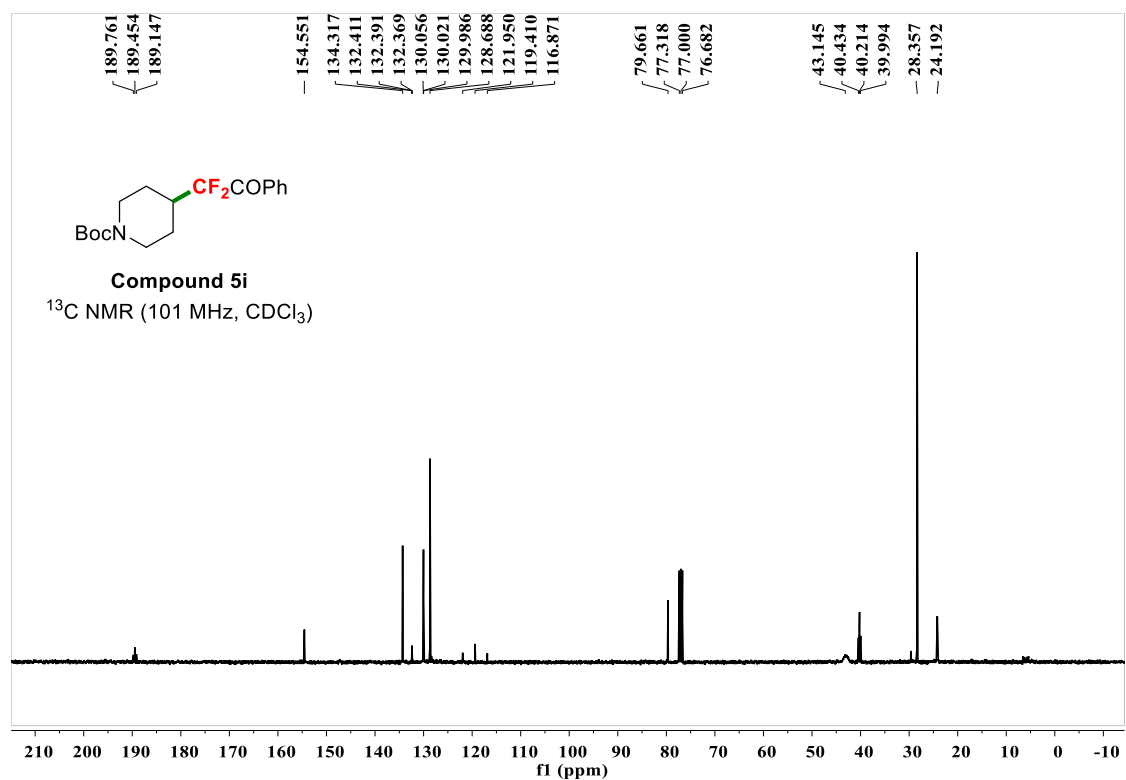

**Tert-butyl 3-(1,1-difluoro-2-oxo-2-phenylethyl)pyrrolidine-1-carboxylate (5j).**

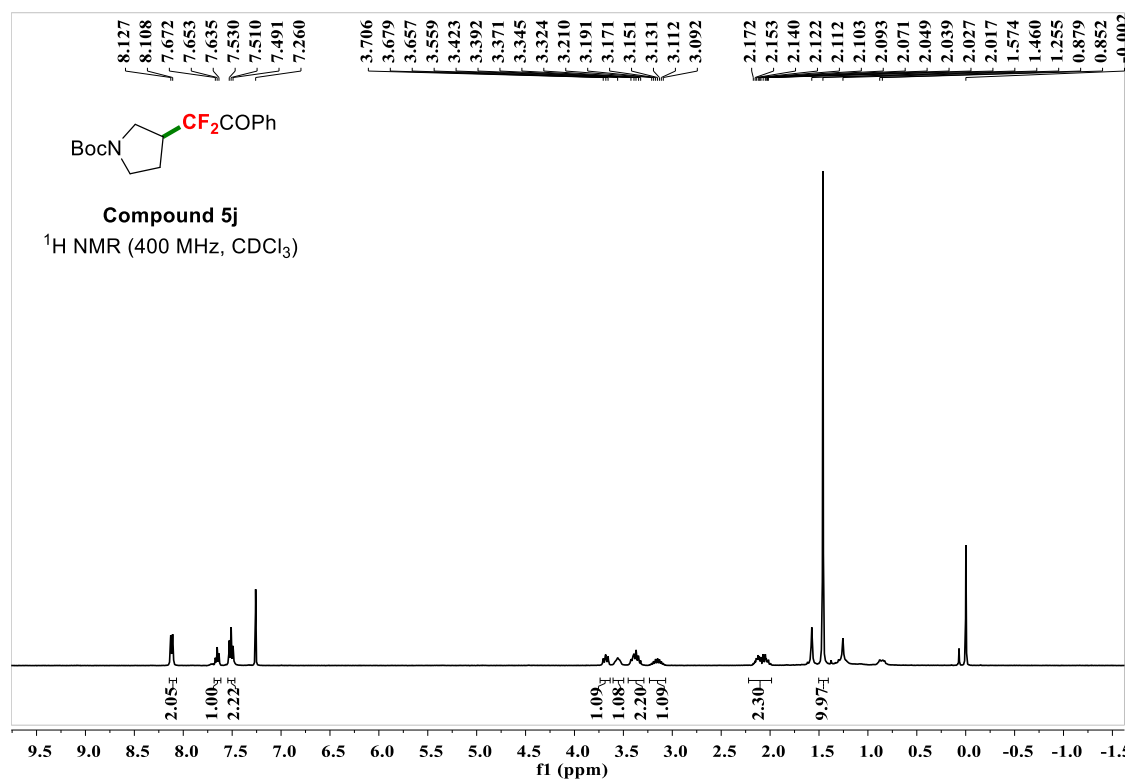

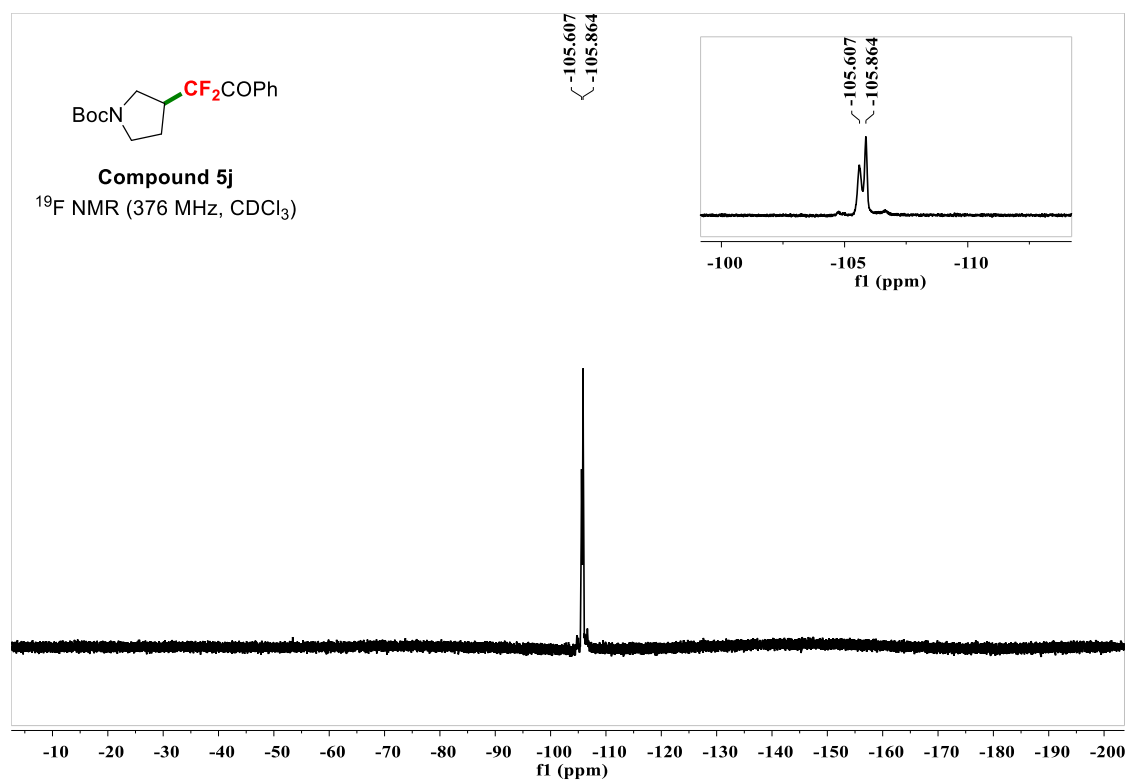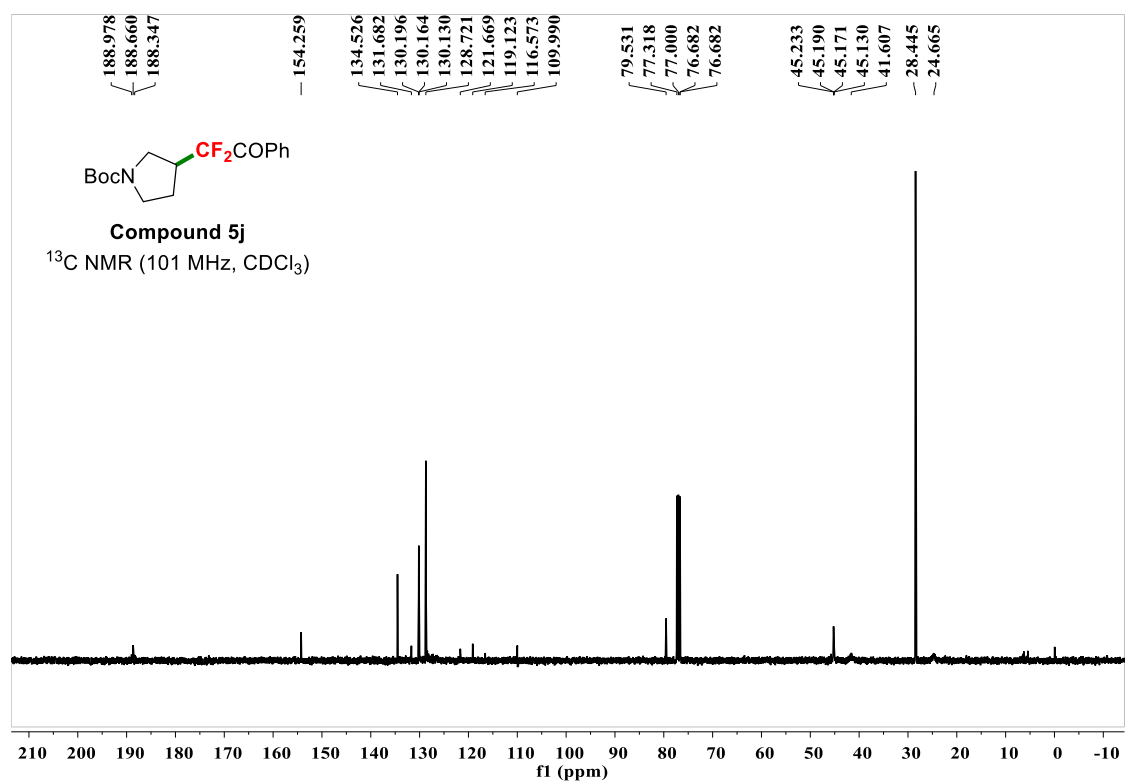



**2,2-Difluoro-1-phenyl-2-(tetrahydro-2H-pyran-4-yl)ethan-1-one (5k).**

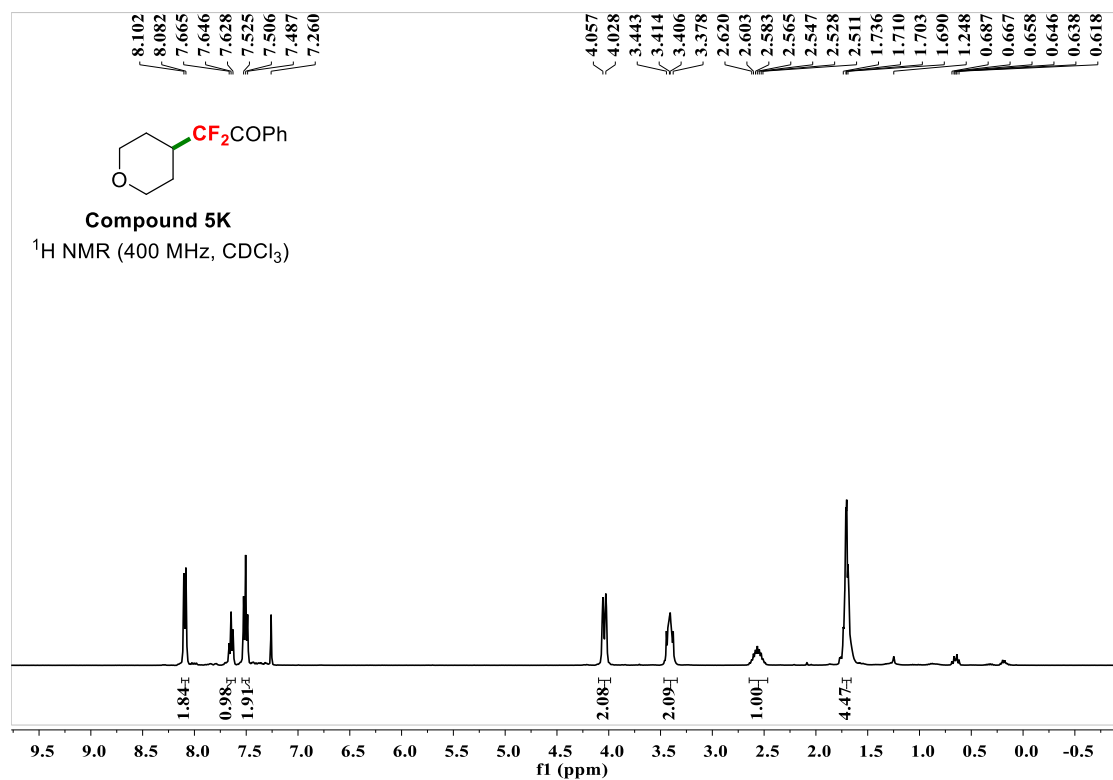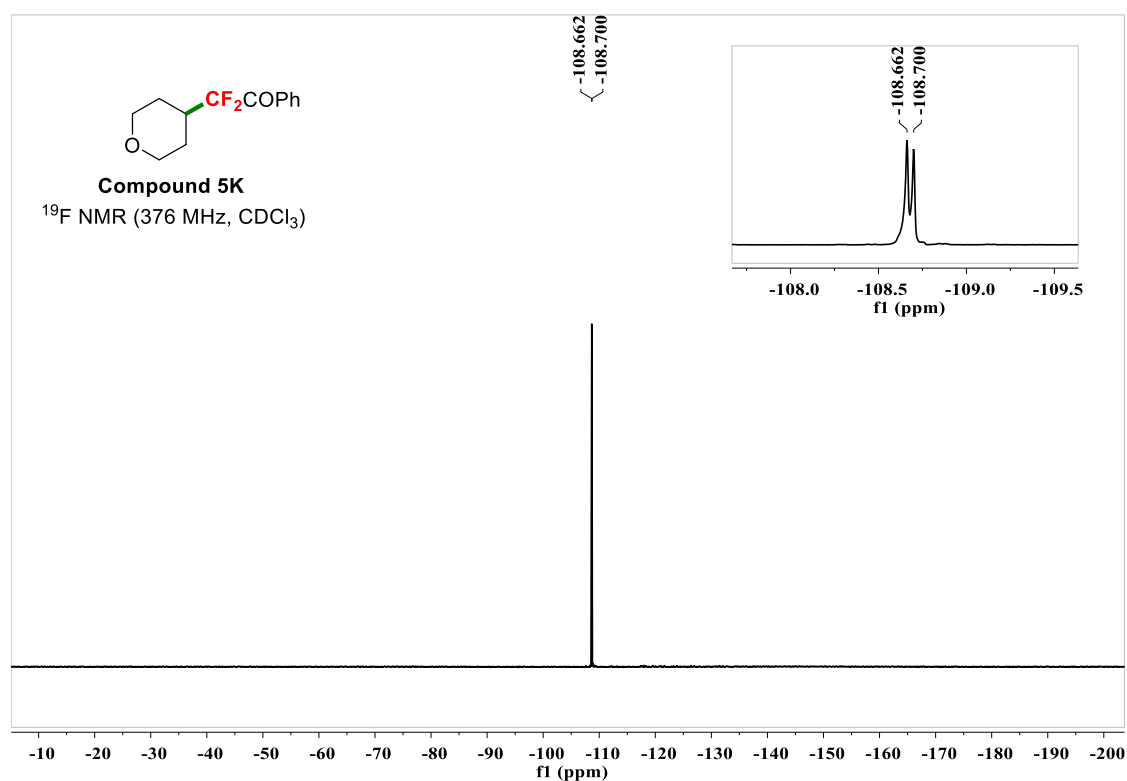

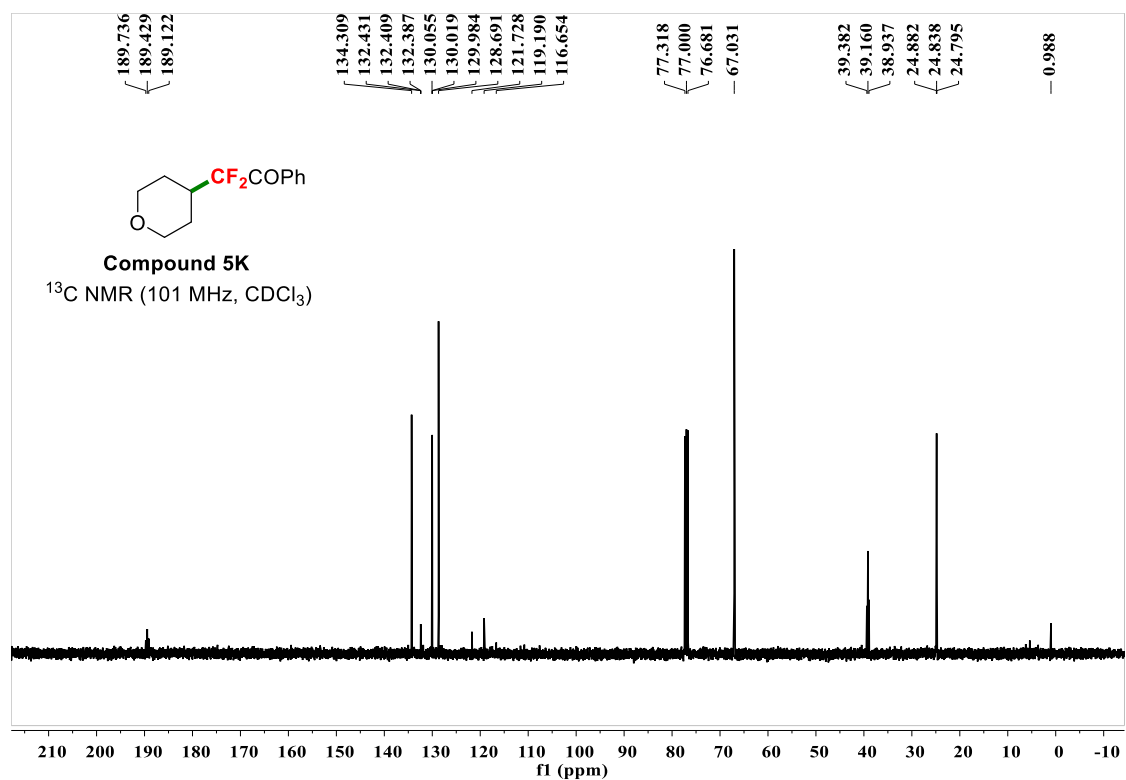

## 2,2-Difluoro-3-methyl-1,5-diphenylpentan-1-one (5I).

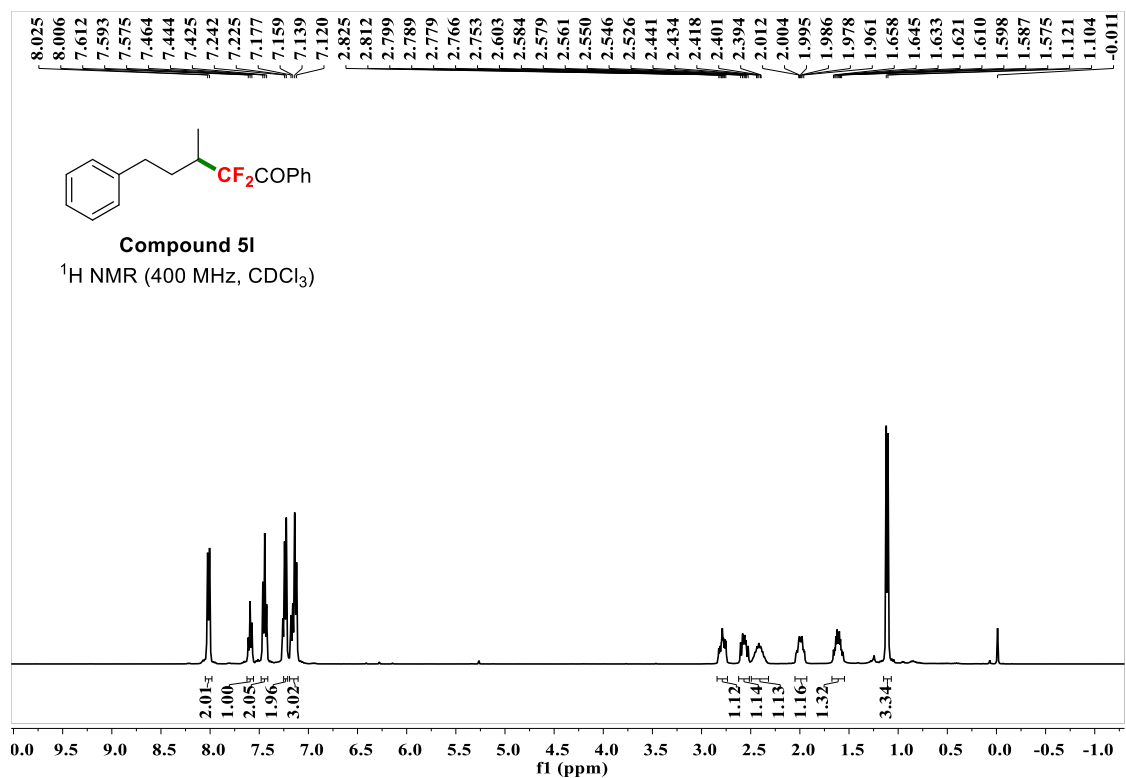

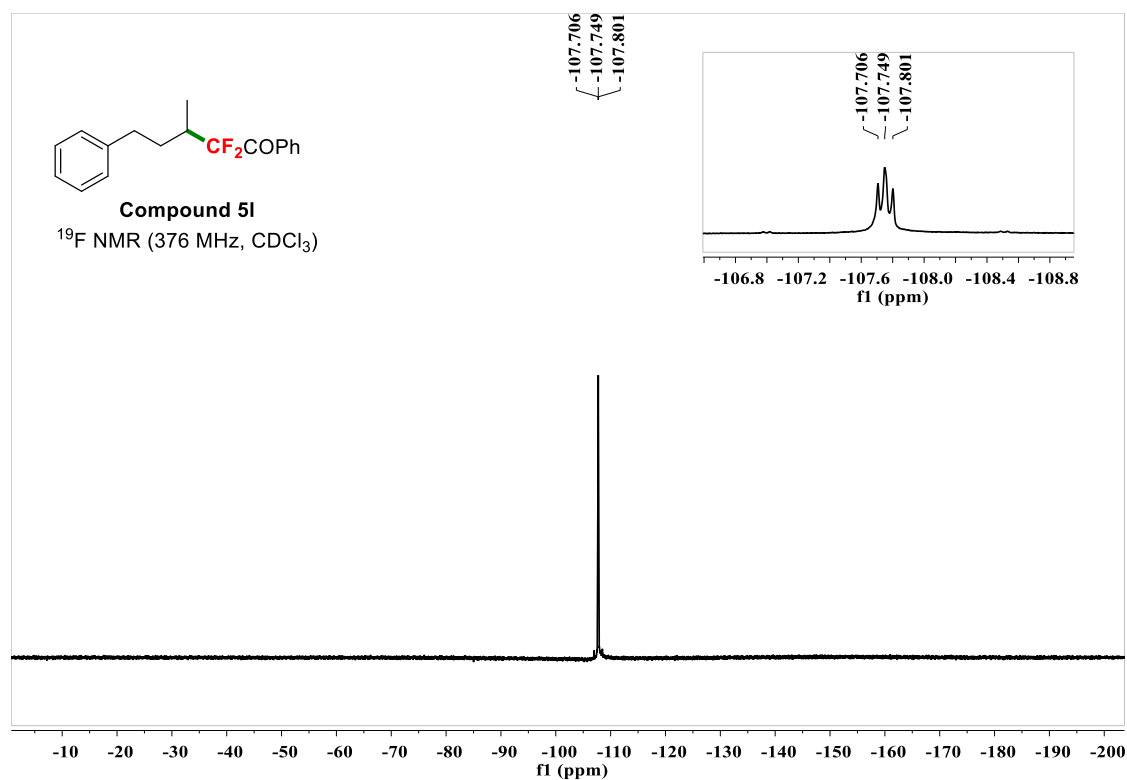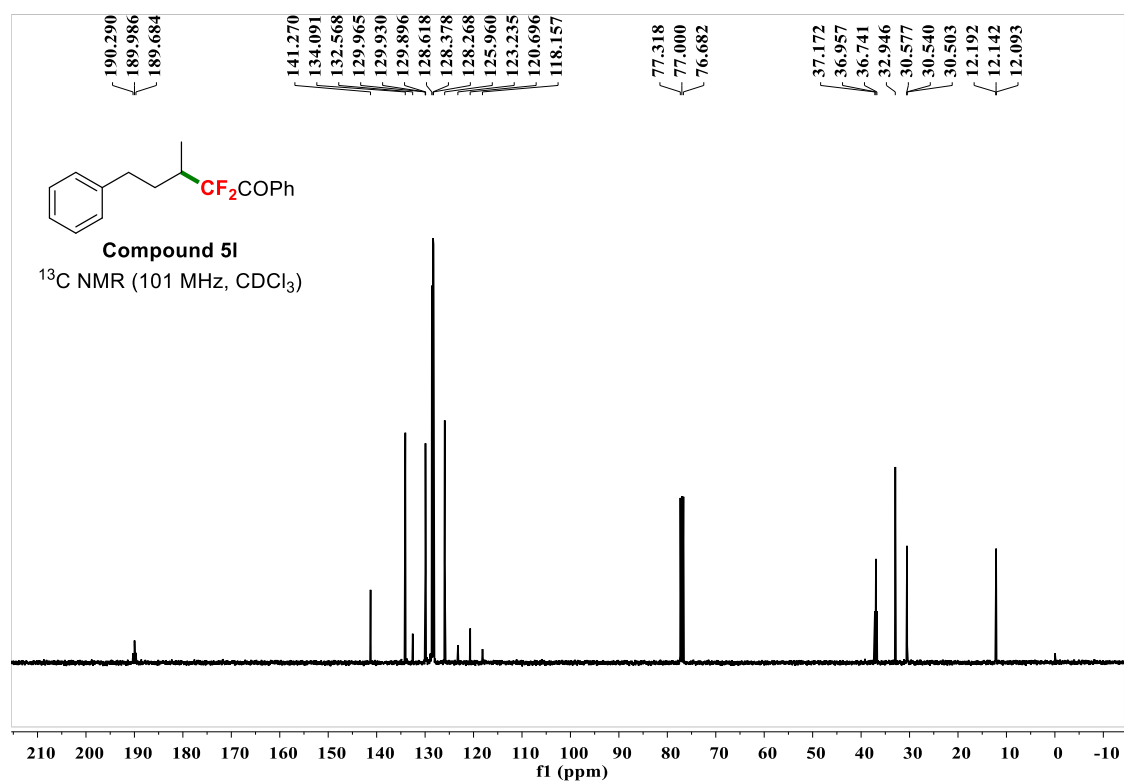

**Methyl 3,3-difluoro-4-oxo-2-phenethyl-4-phenylbutanoate (5m).**

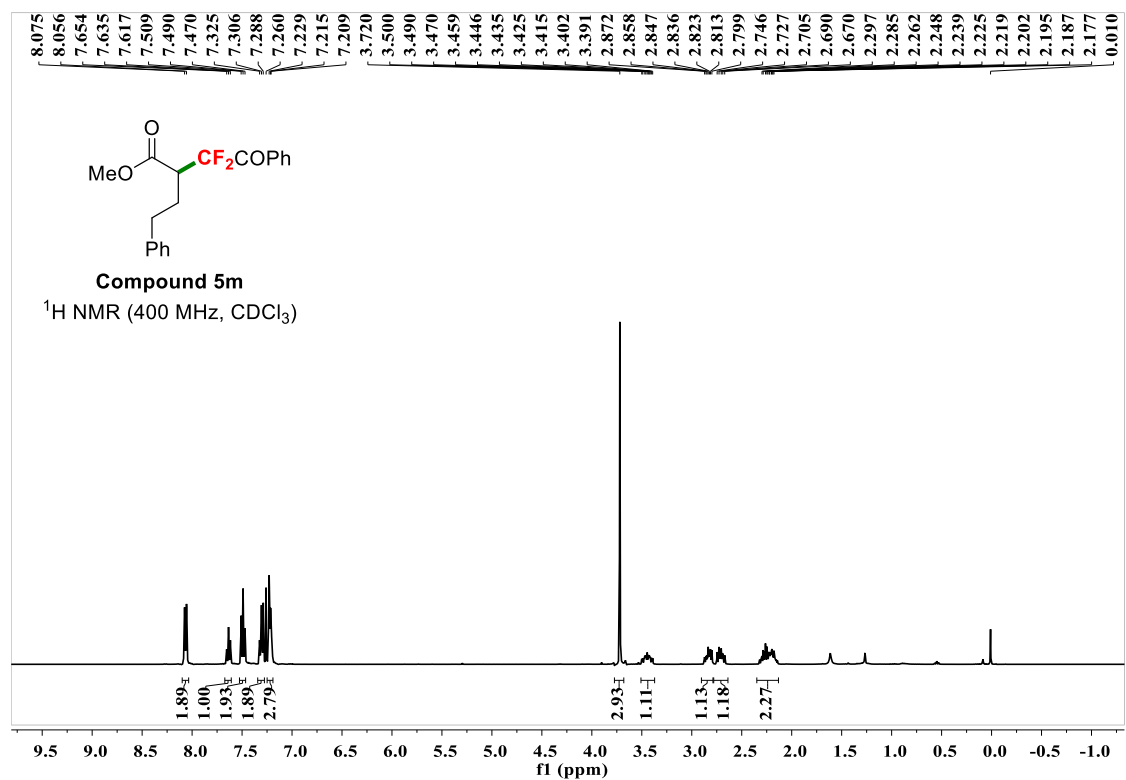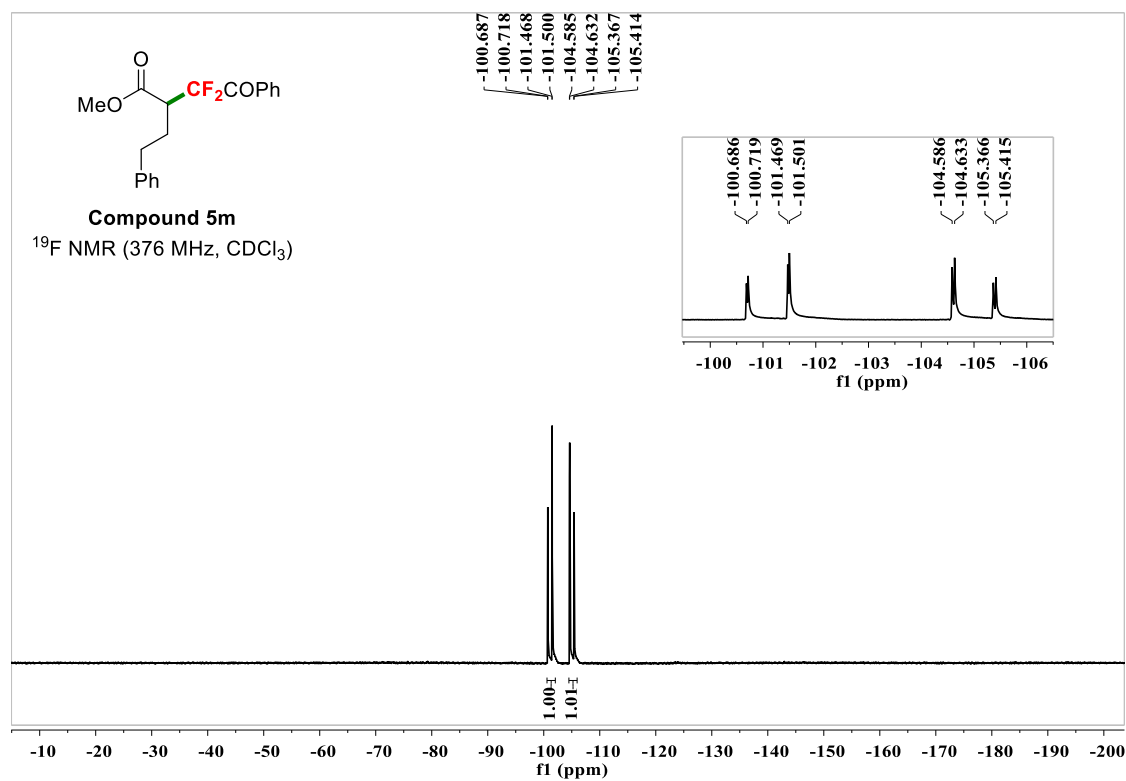

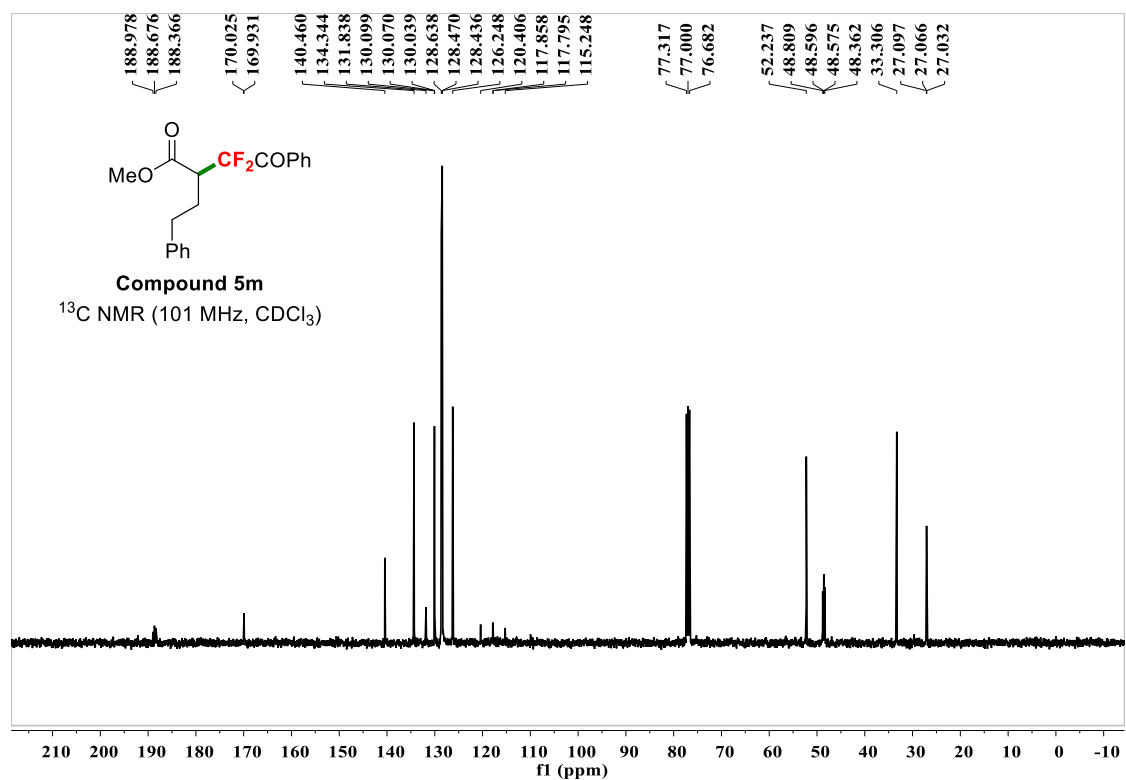

### Methyl 2-benzyl-3,3-difluoro-4-oxo-4-phenylbutanoate (5n).

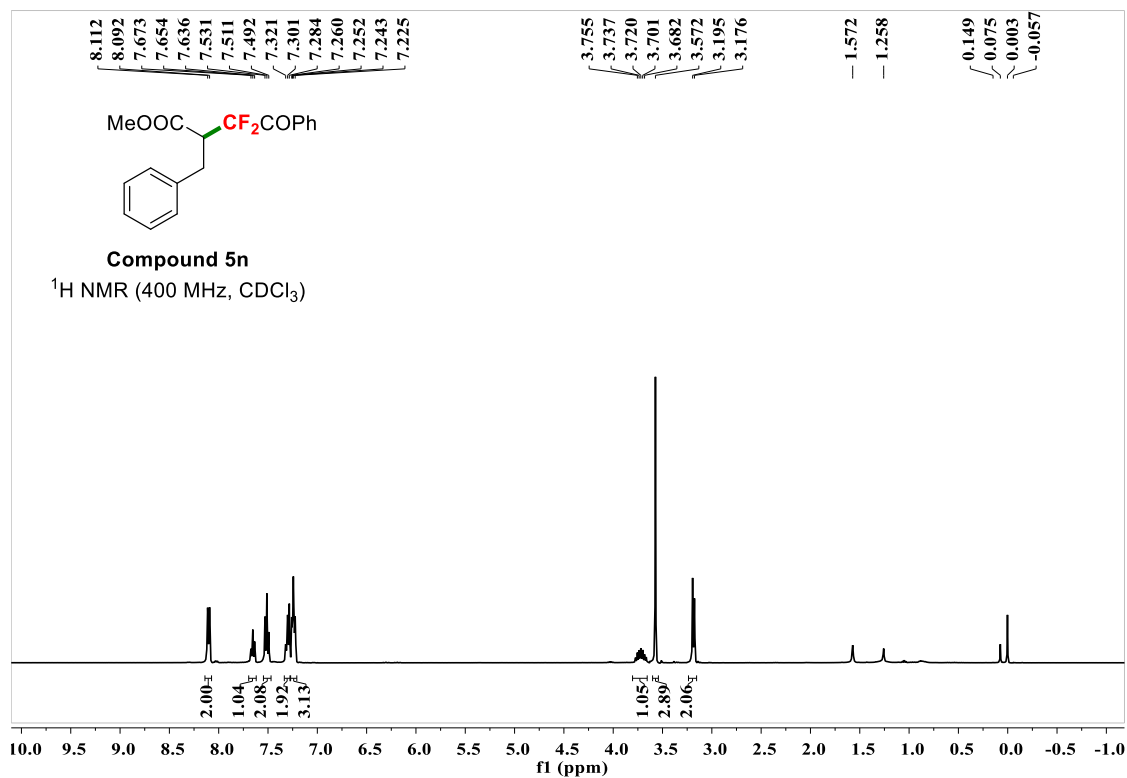

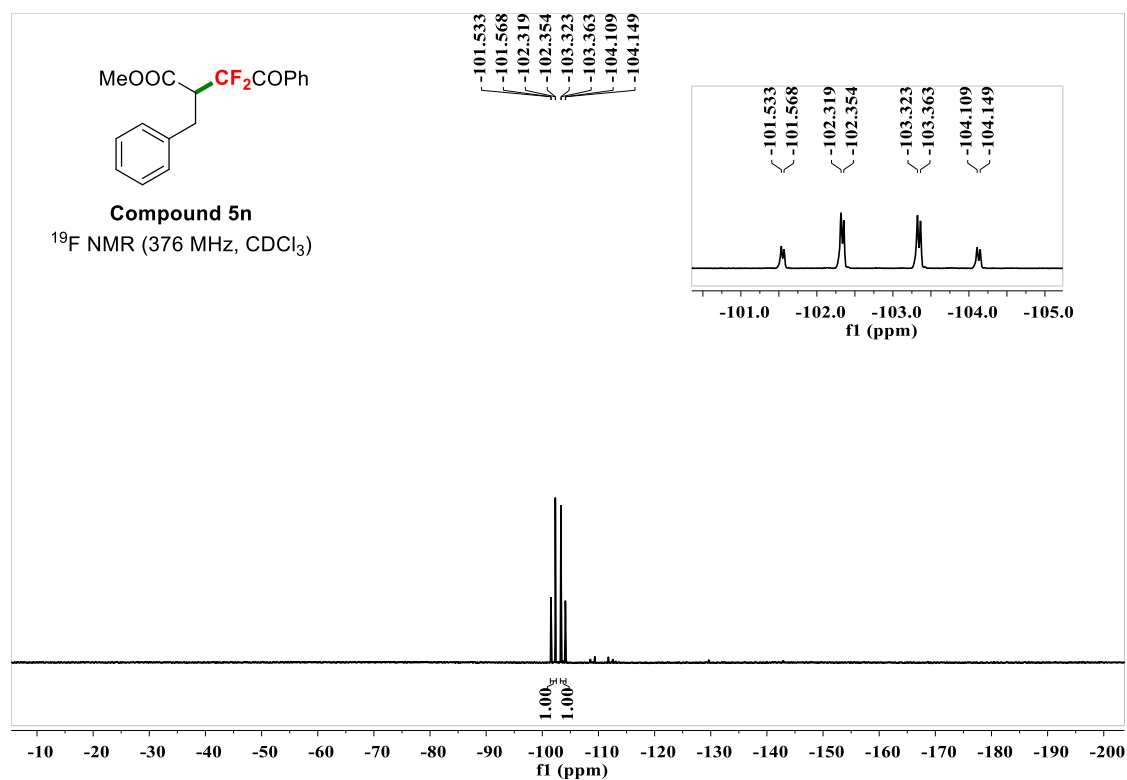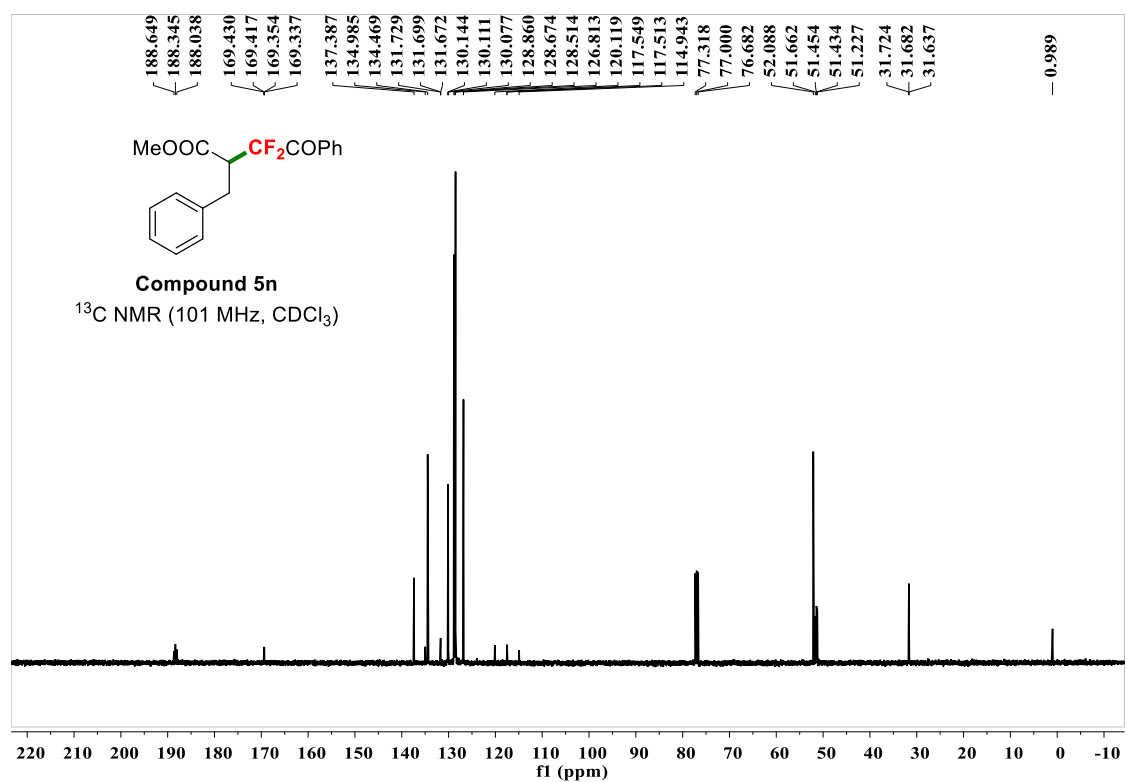

**Methyl 2-(4-chlorobenzyl)-3,3-difluoro-4-oxo-4-phenylbutanoate (5o).**

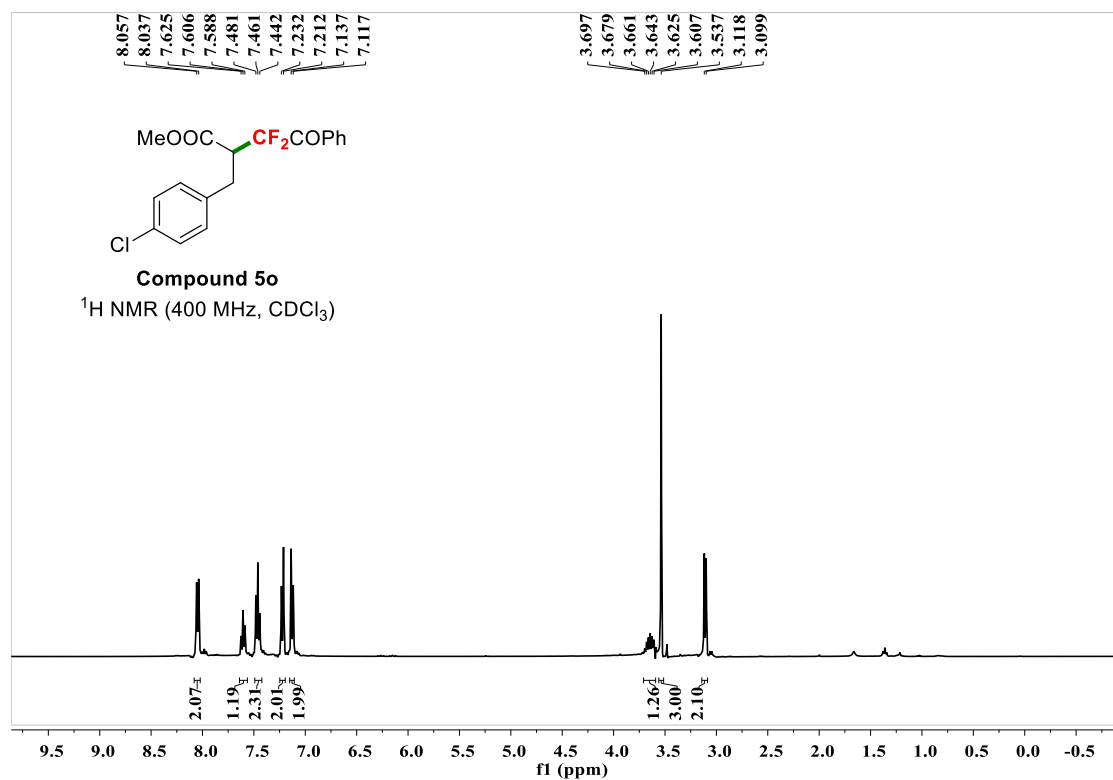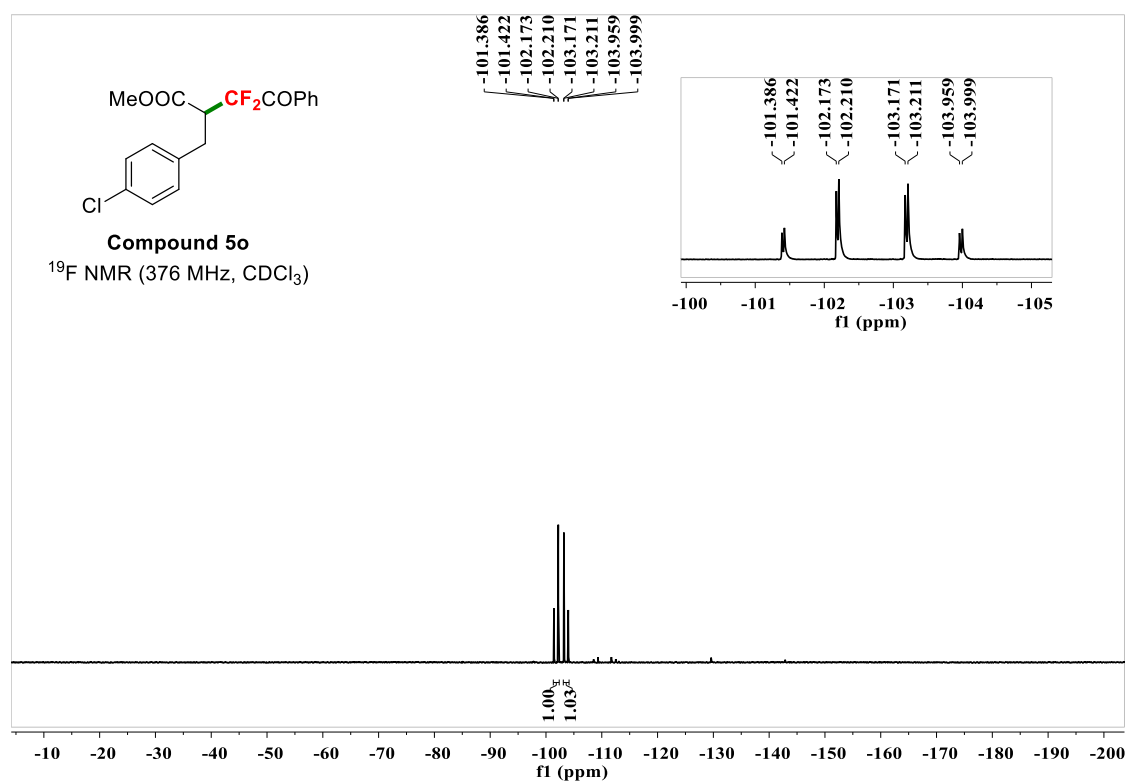

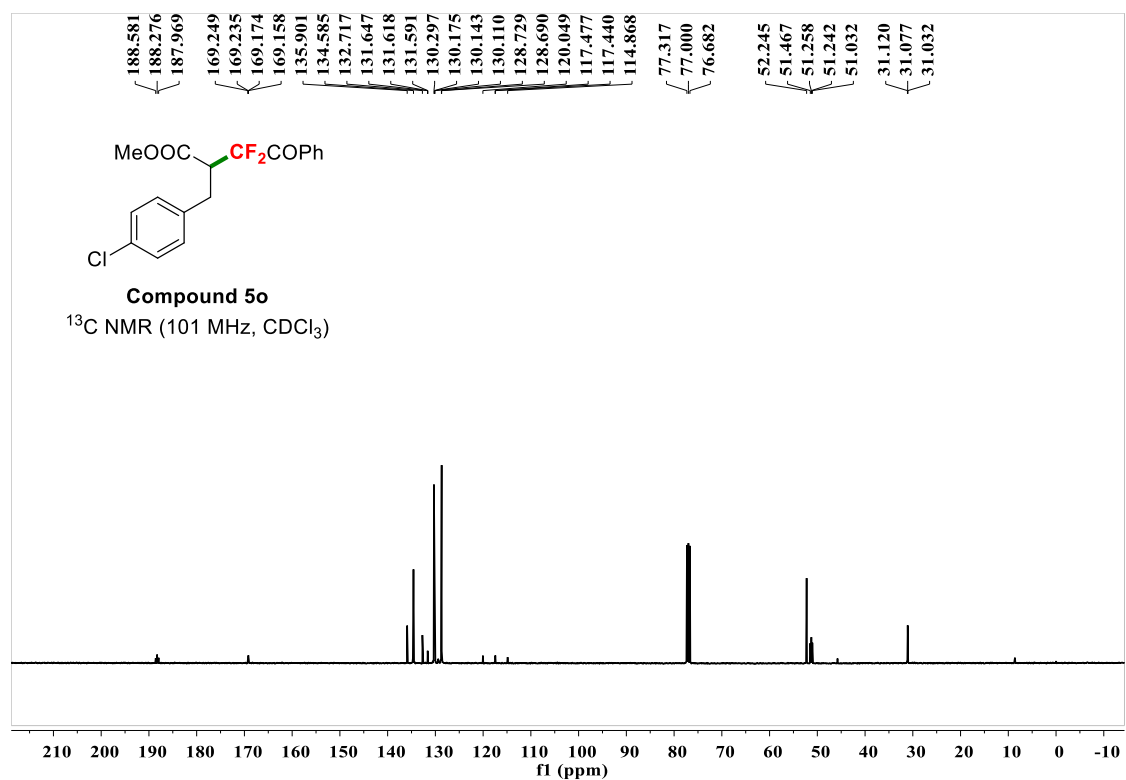

### Methyl 3,3-difluoro-2-(4-fluorobenzyl)-4-oxo-4-phenylbutanoate (5p).

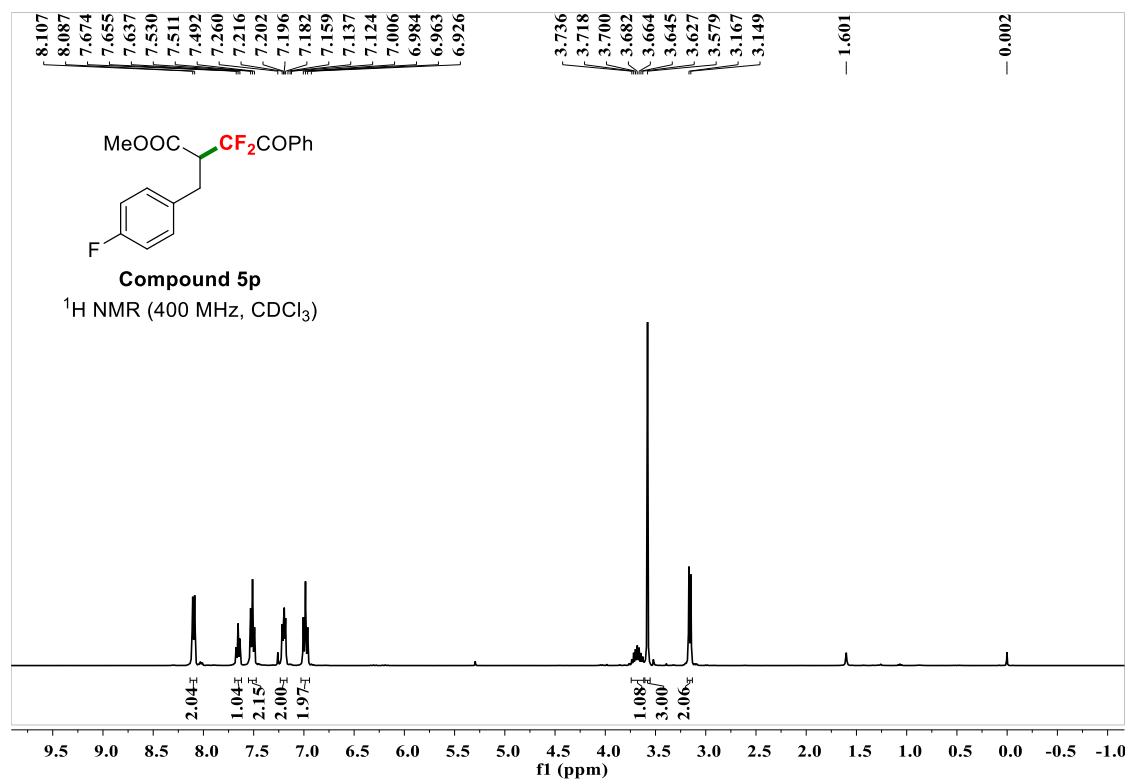



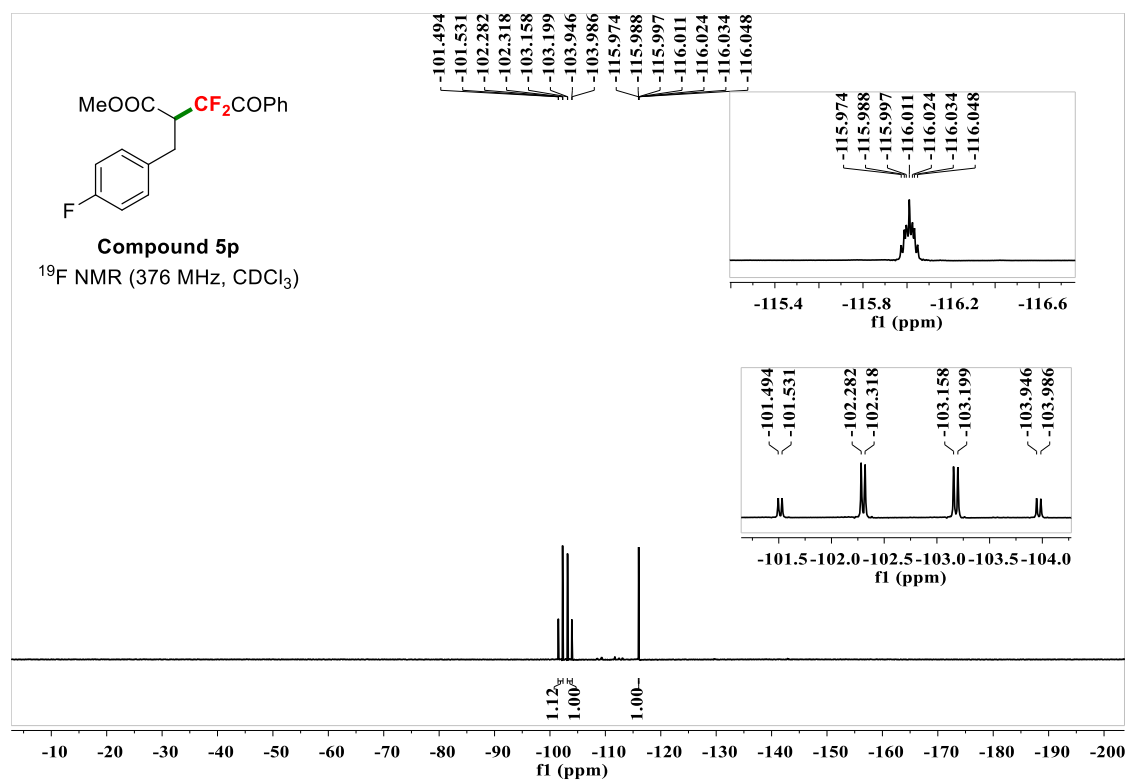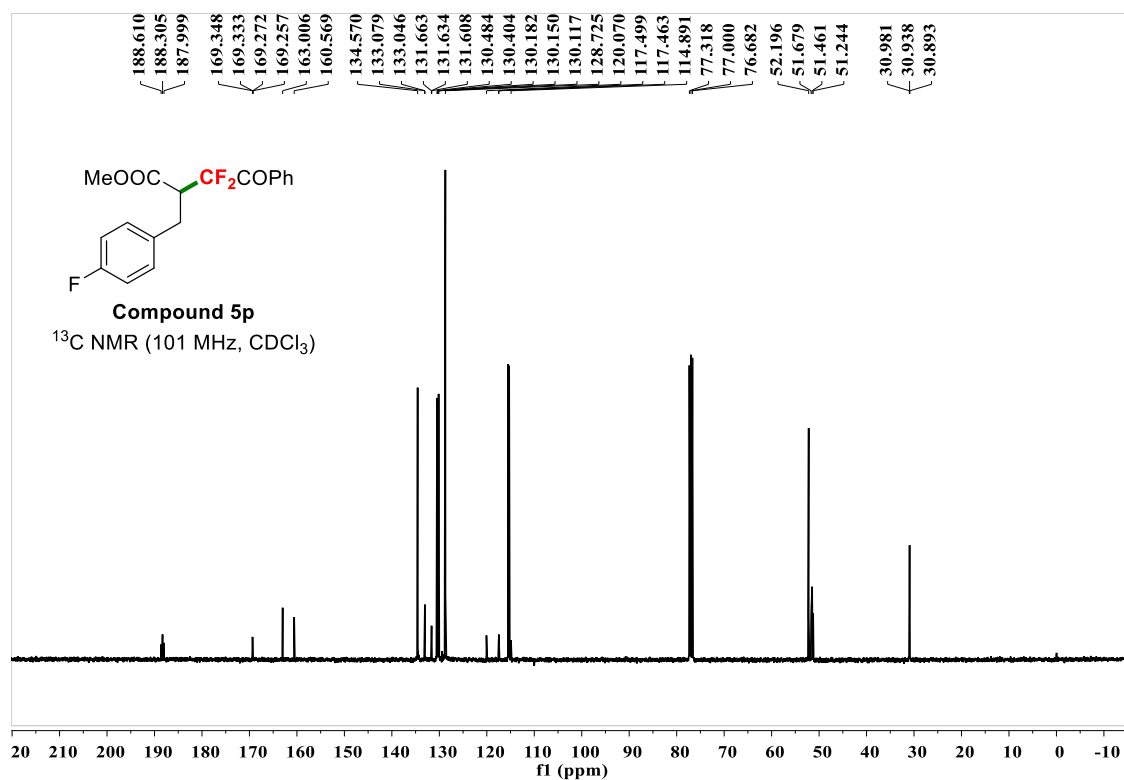

**Methyl-2-(4-(tert-butoxy)benzyl)-3,3-difluoro-4-oxo-4-phenylbutanoate (5q).**

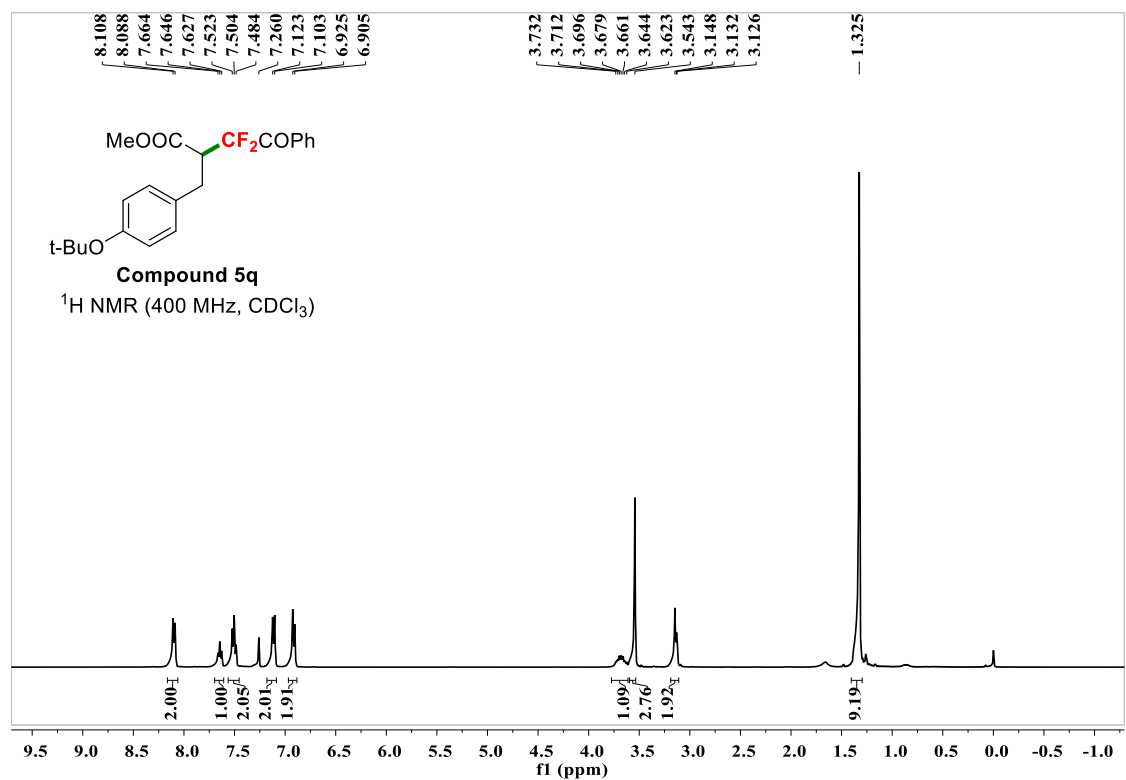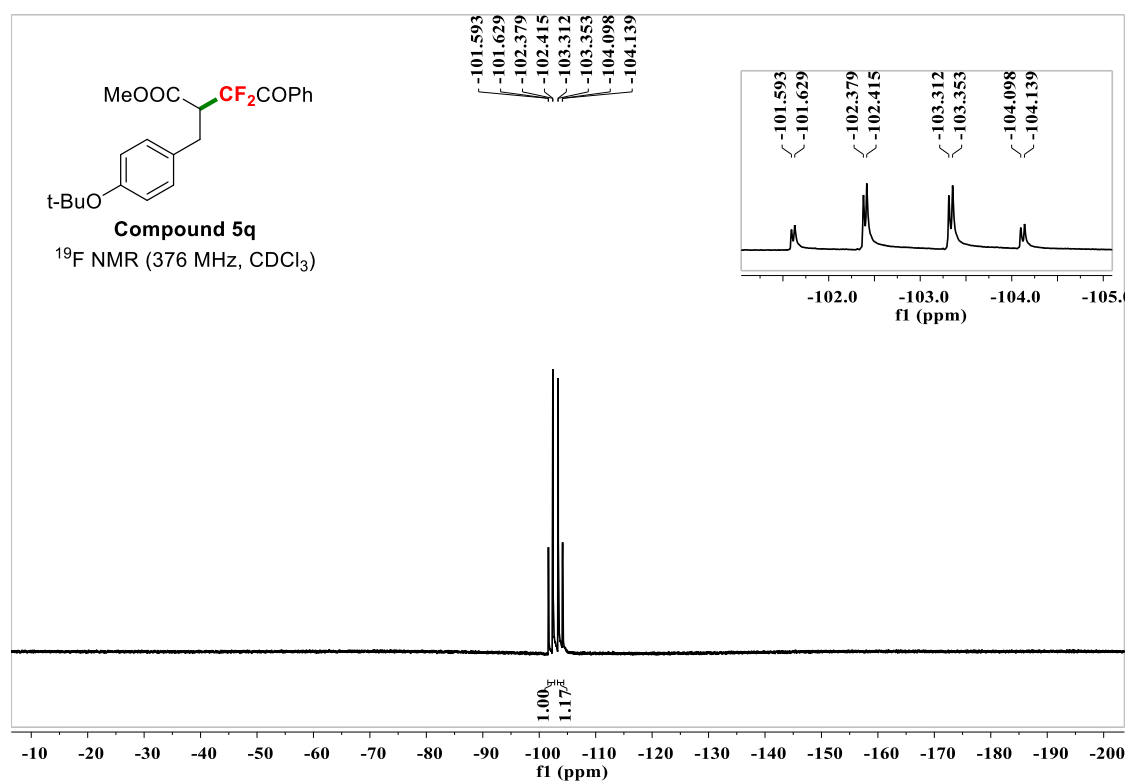

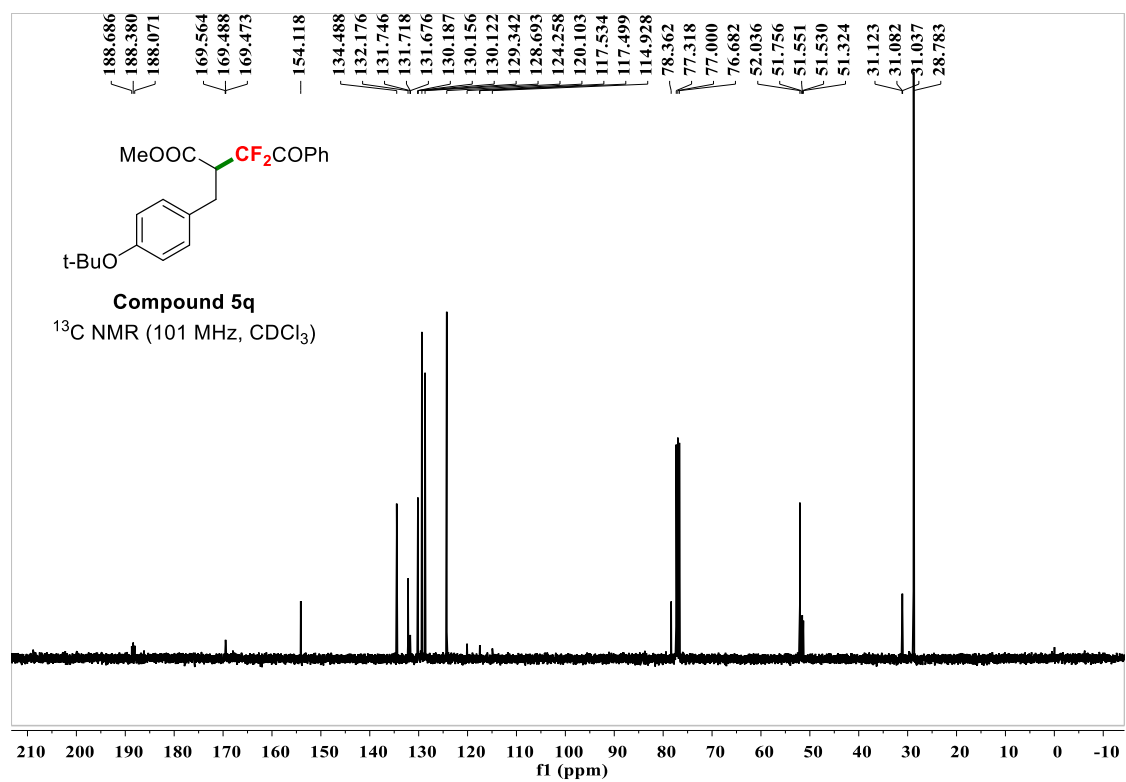

**Dimethyl 2-(1,1-difluoro-2-oxo-2-phenylethyl)pentanedioate (5r).**

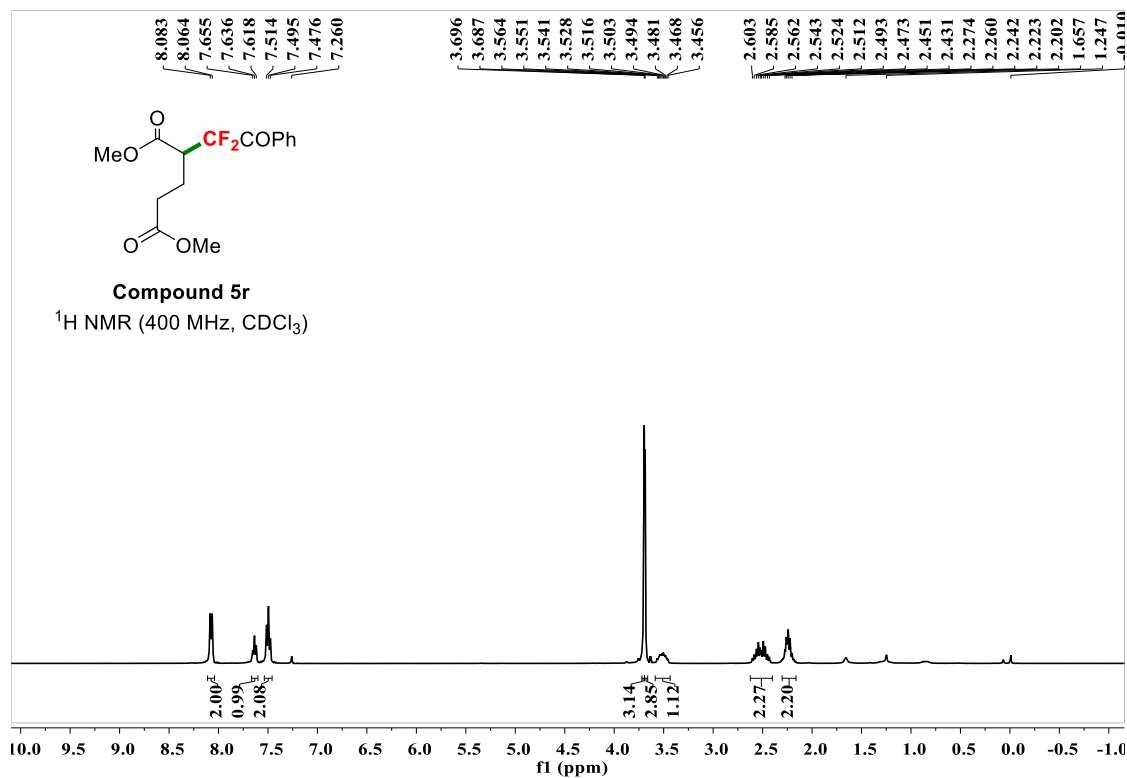

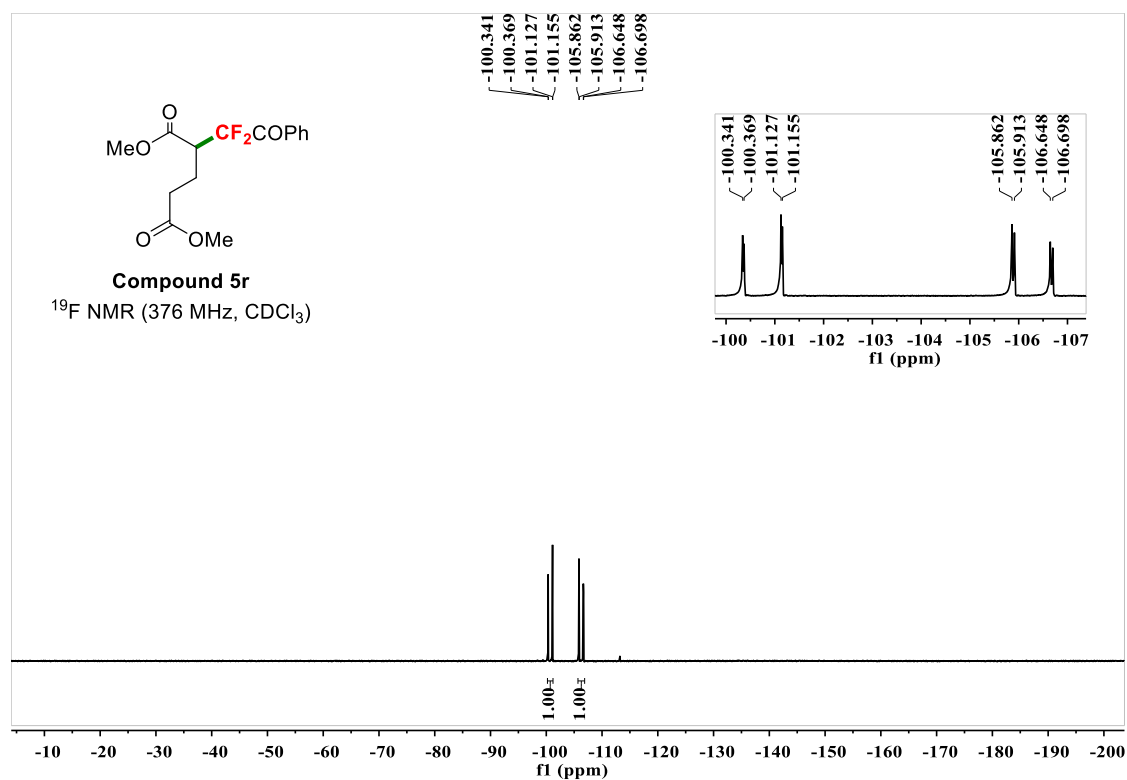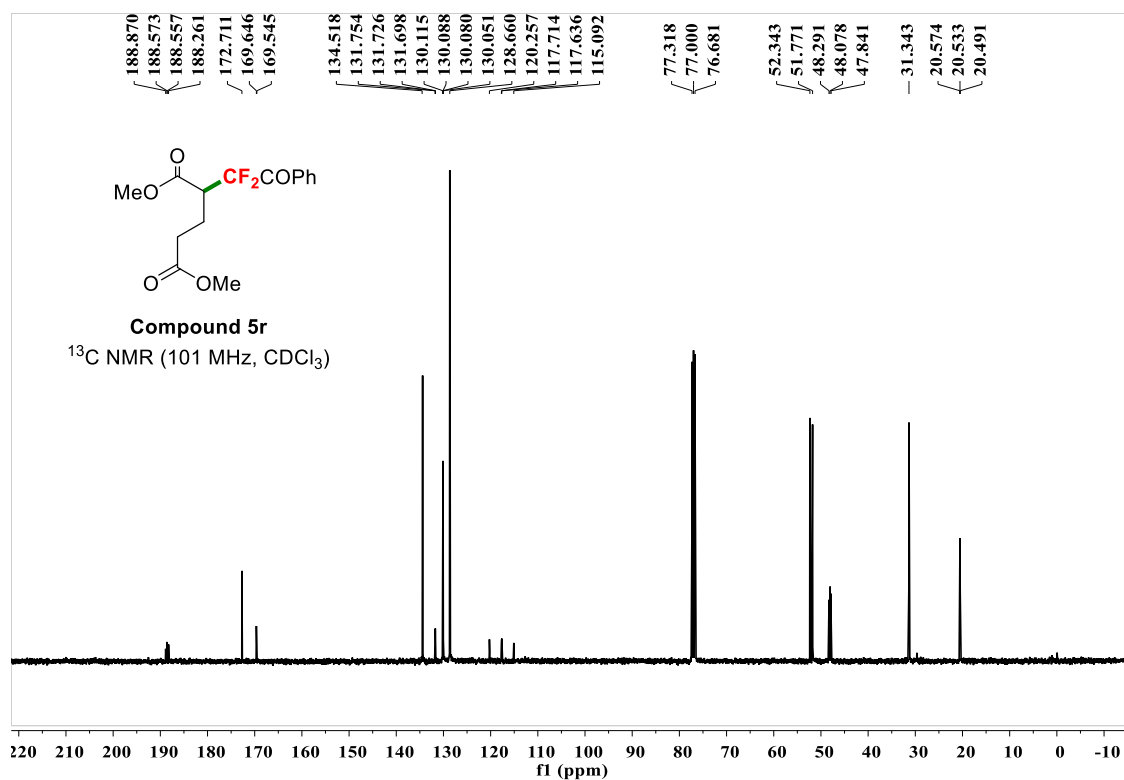

**Dimethyl 2-(1,1-difluoro-2-oxo-2-phenylethyl)succinate (5s).**

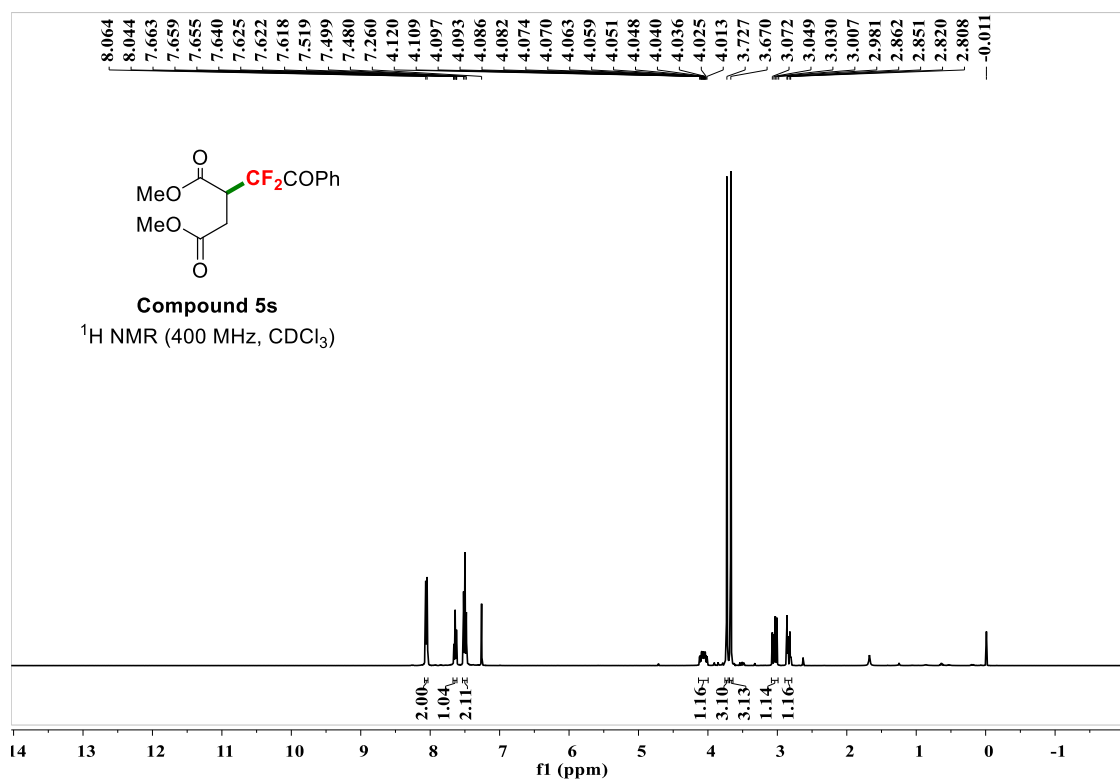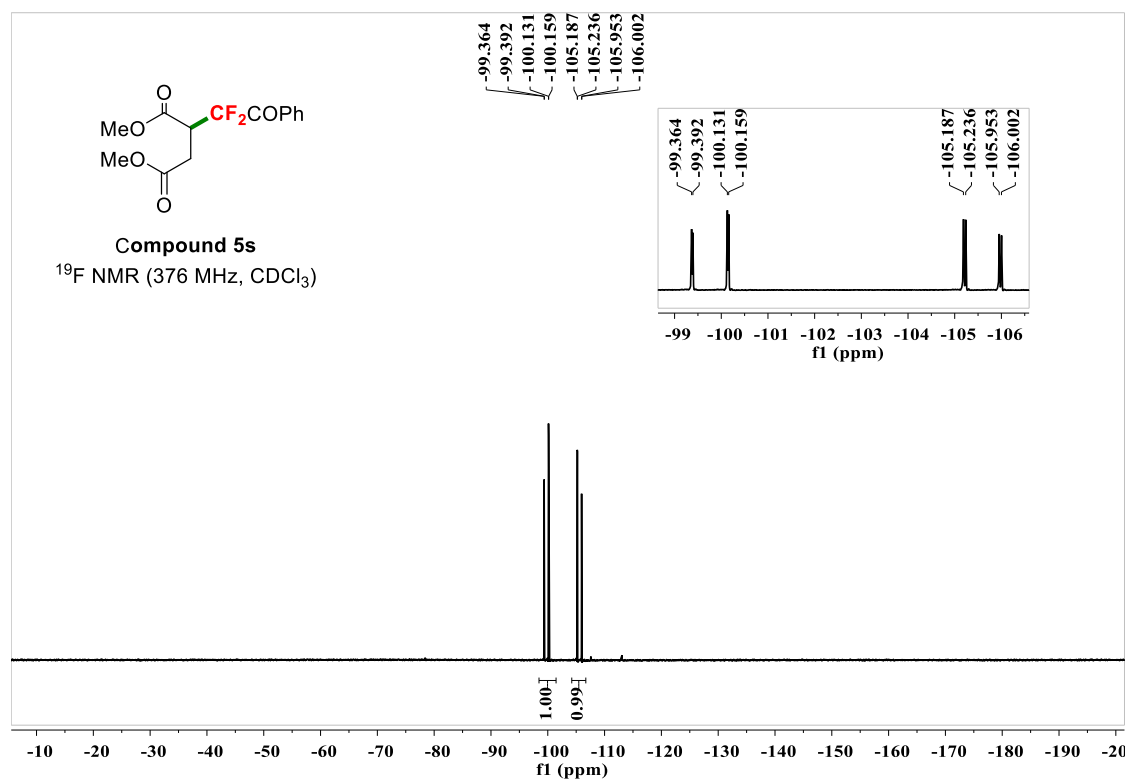

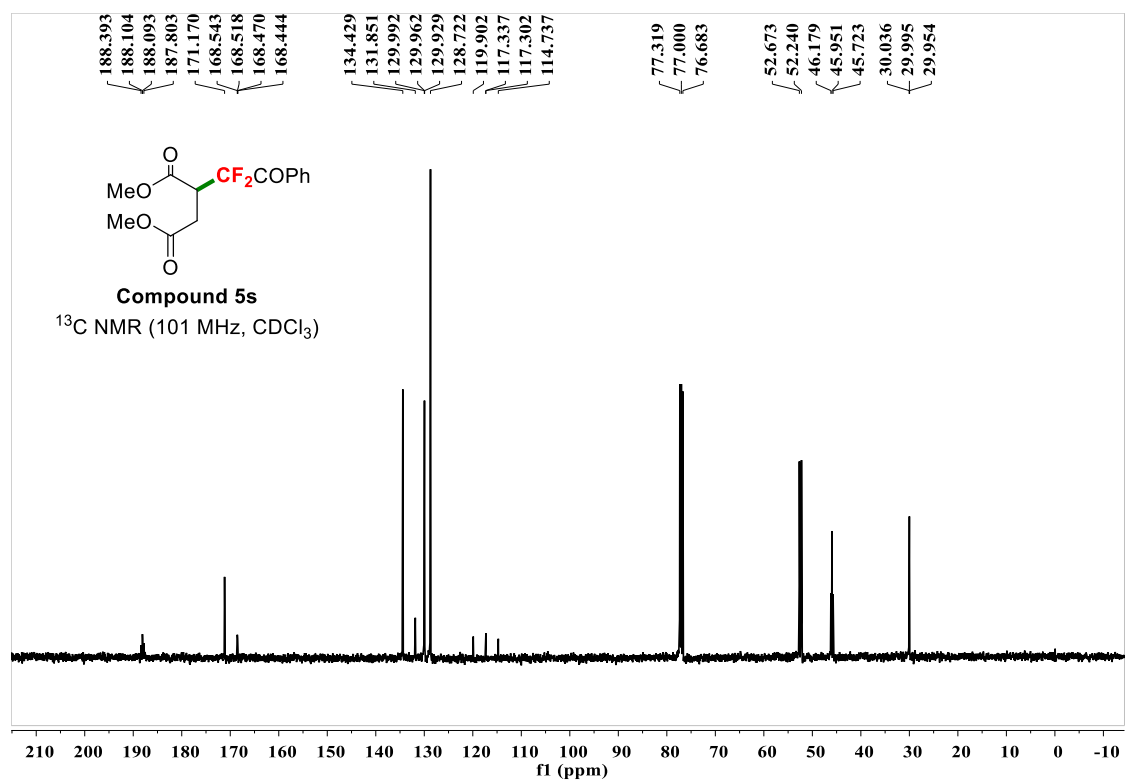

**Methyl 6-((tert-butoxycarbonyl)amino)-2-(1,1-difluoro-2-oxo-2-phenylethyl)hexanoate (5t).**

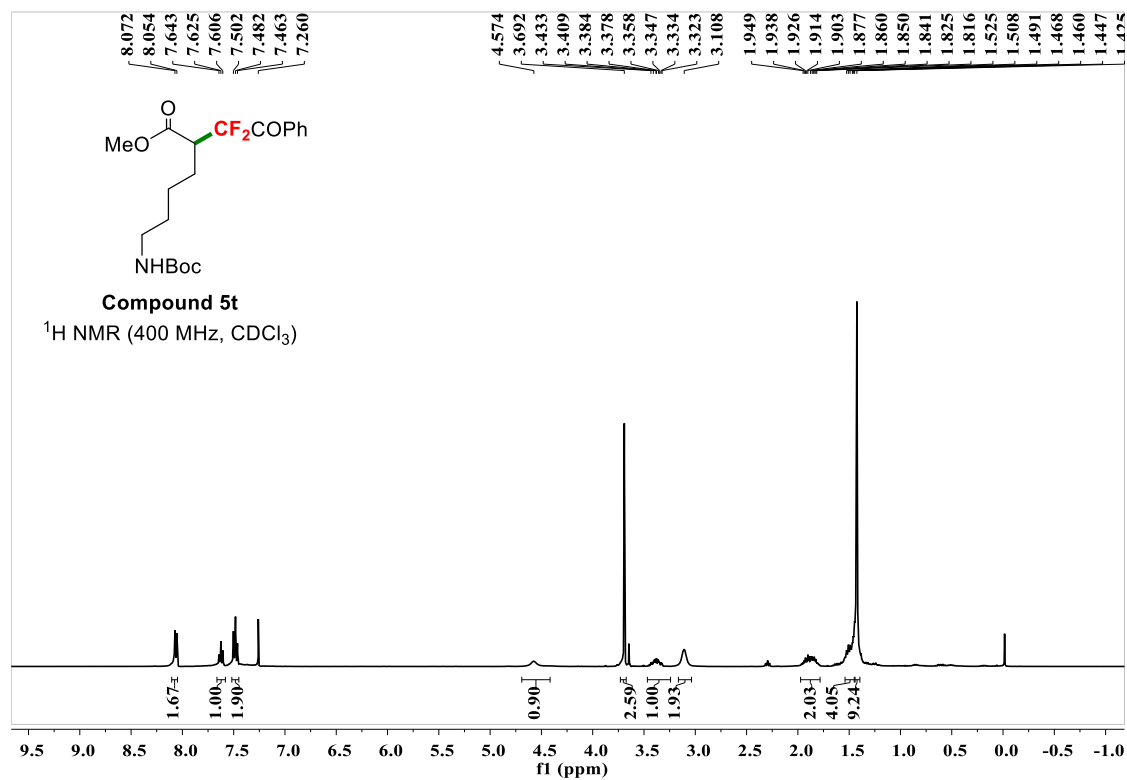

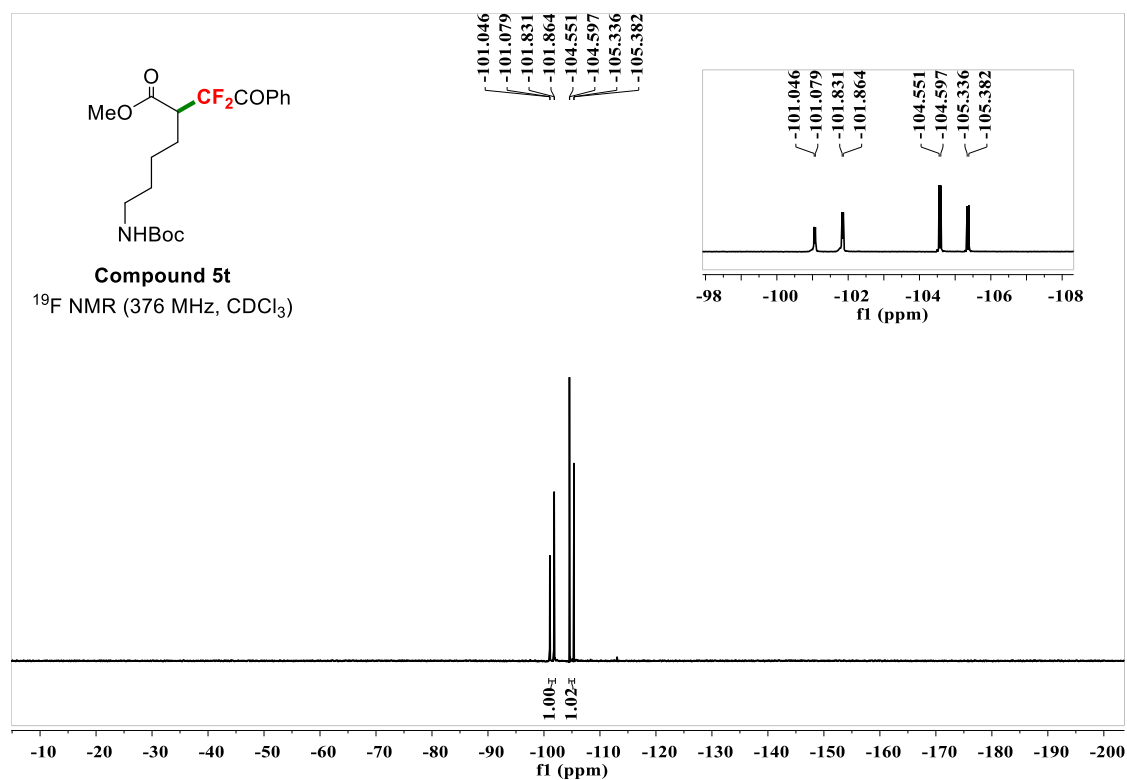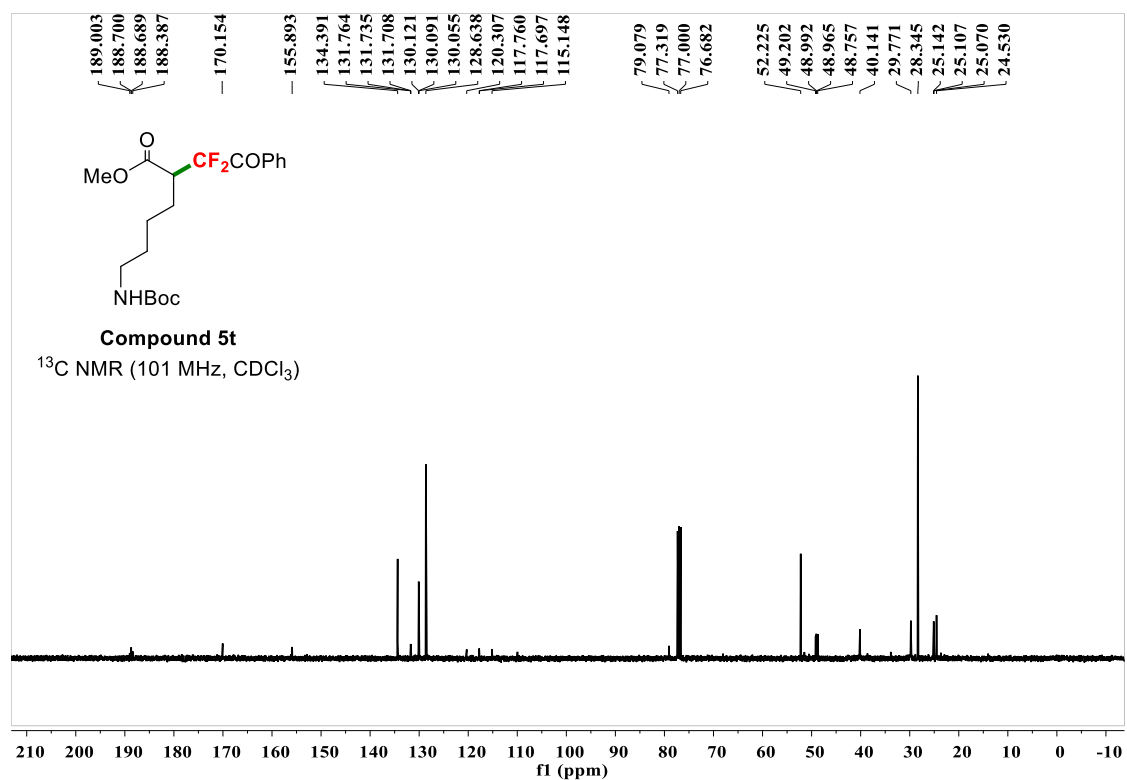

**Methyl 3,3-difluoro-2-(2-(methylthio)ethyl)-4-oxo-4-phenylbutanoate (5u).**

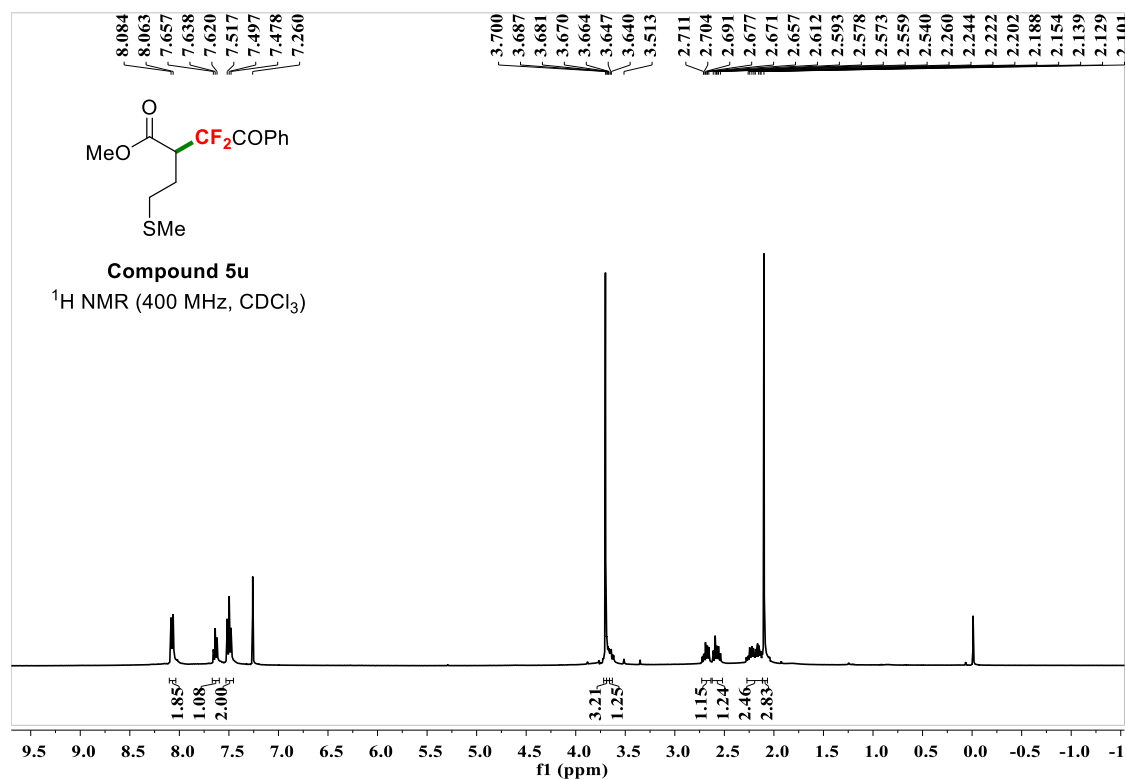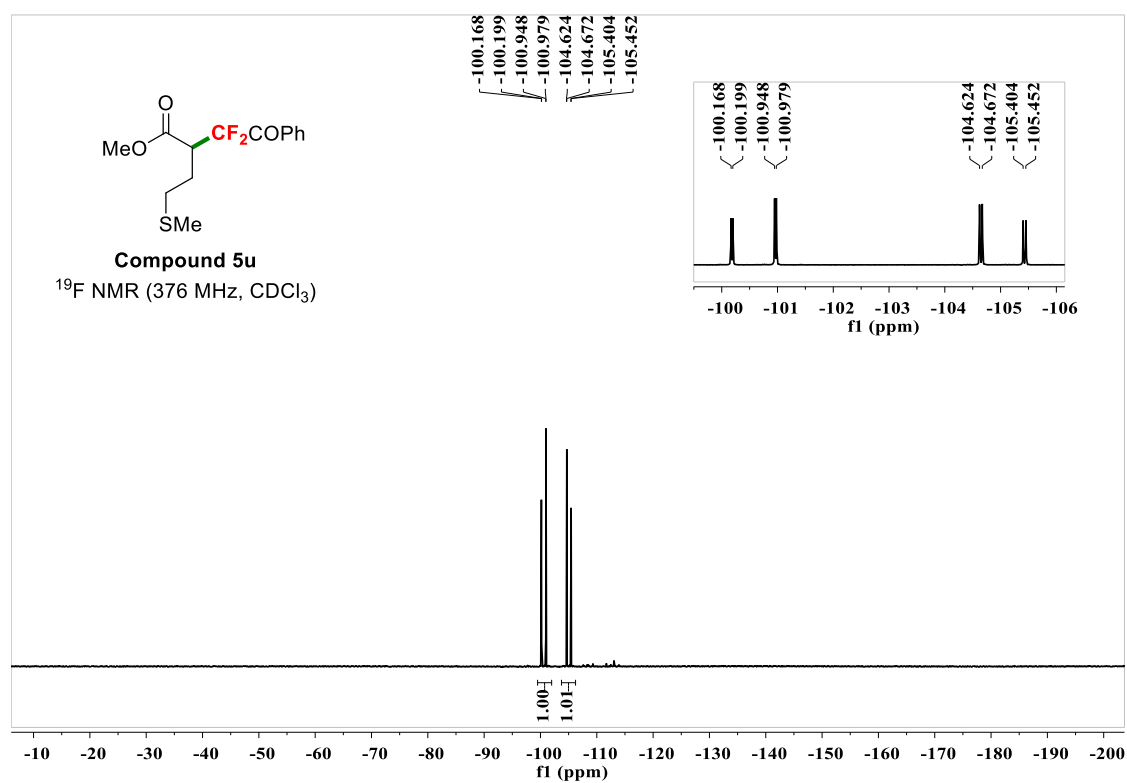



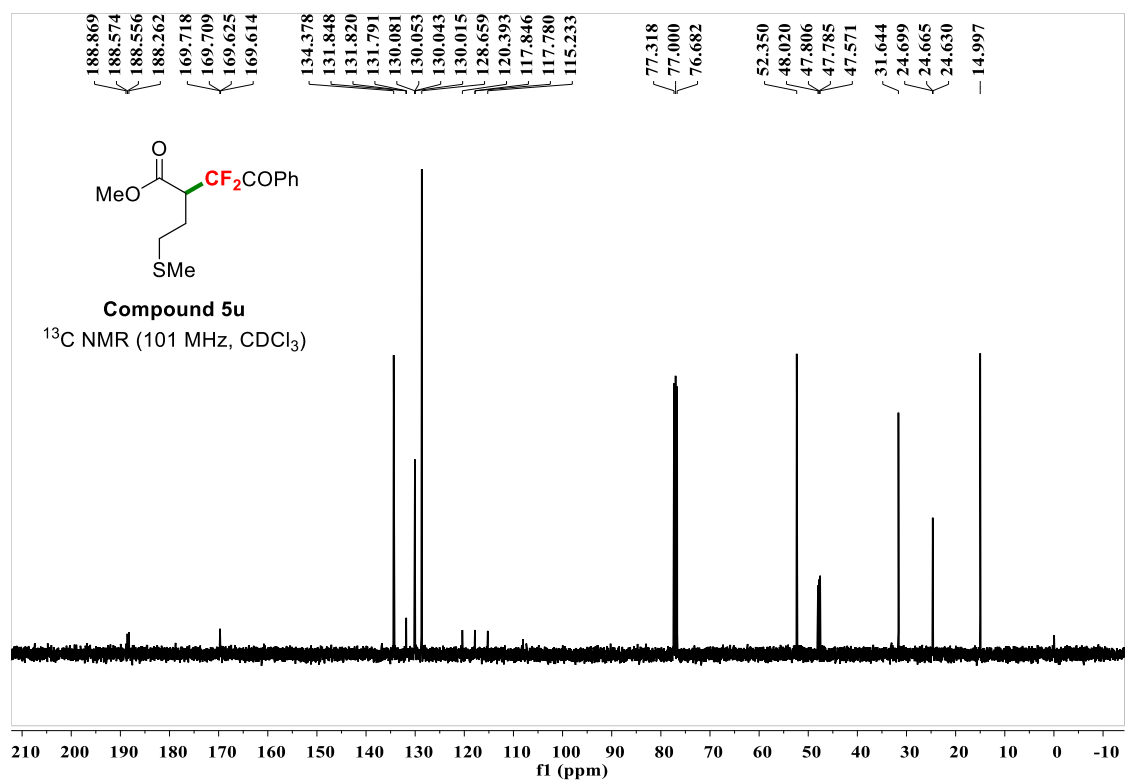

## 2,2-Difluoro-1,3-diphenylpropan-1-one (5v).

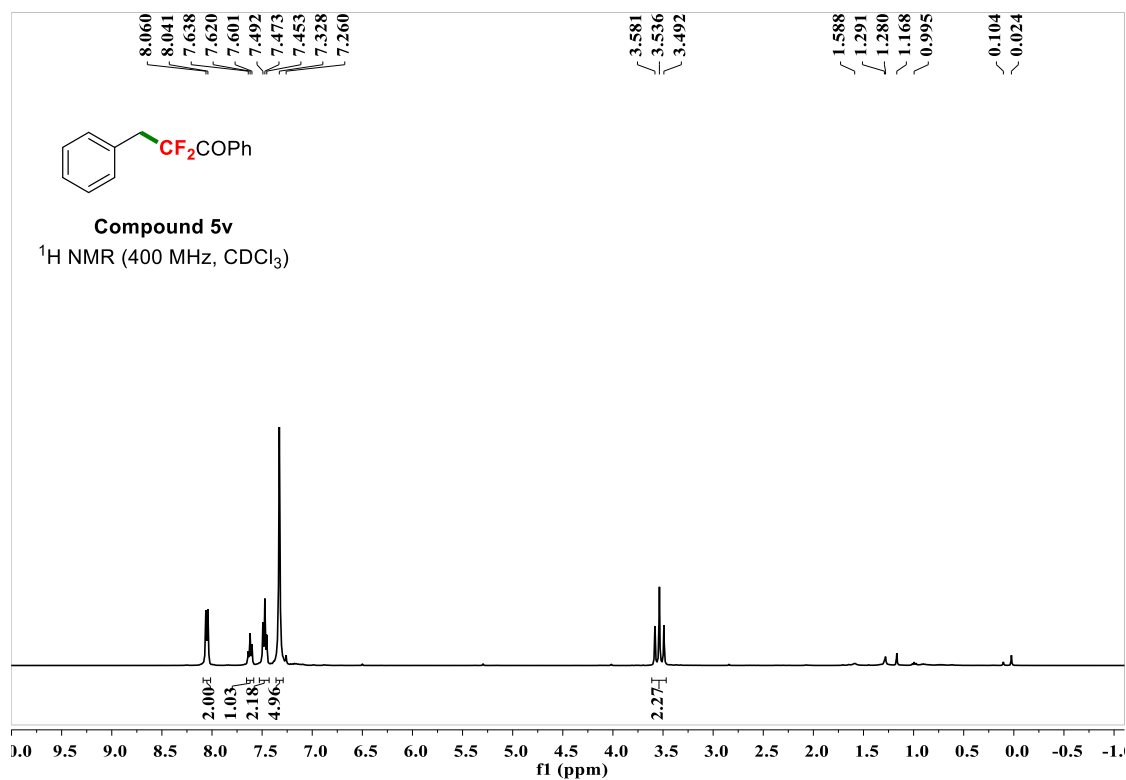

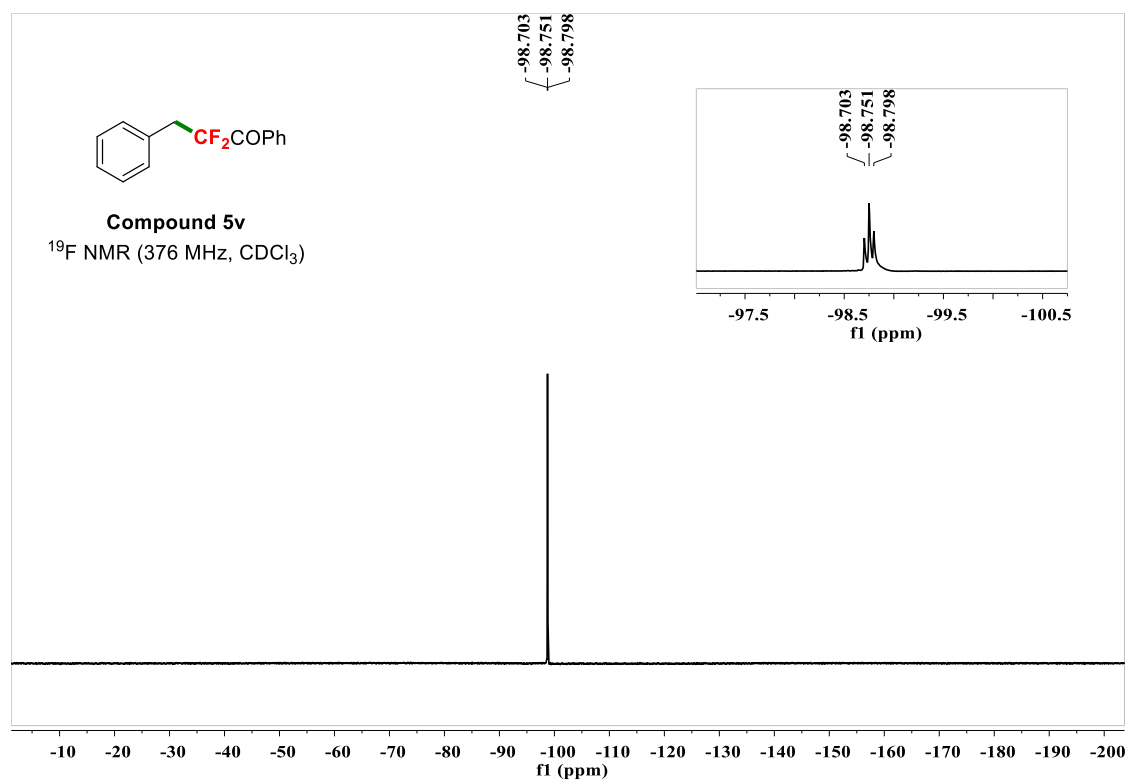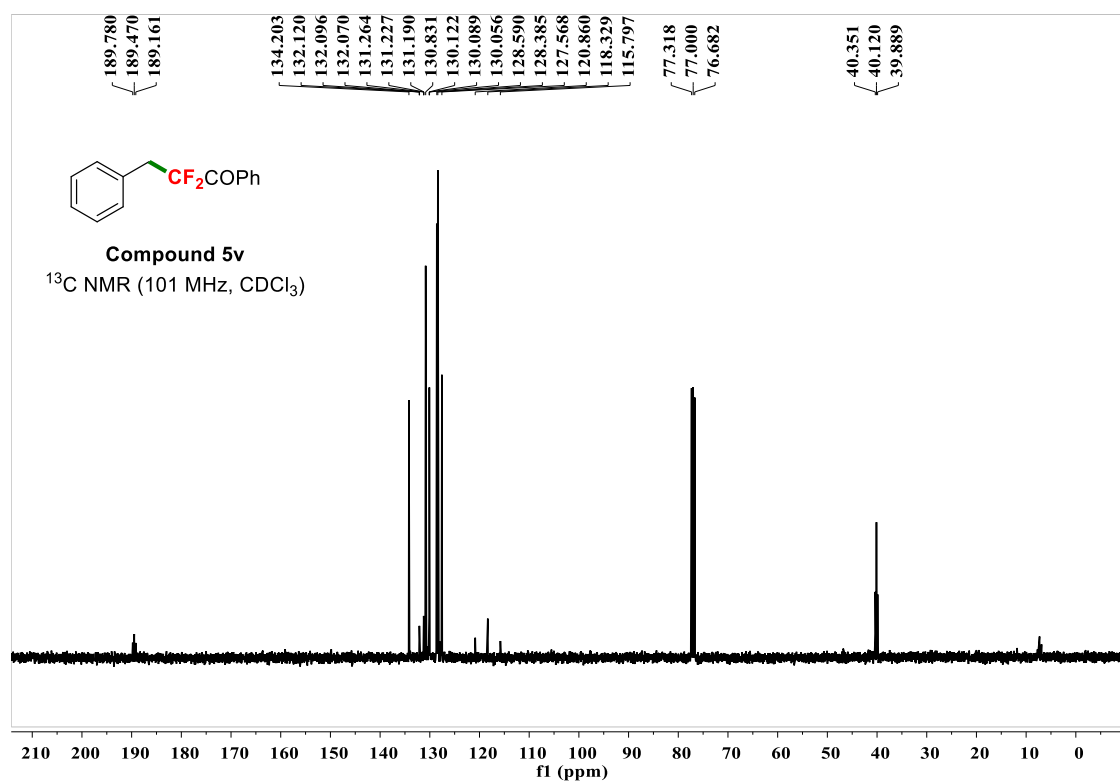

**3-(2-Bromophenyl)-2,2-difluoro-1-phenylpropan-1-one (5w).**

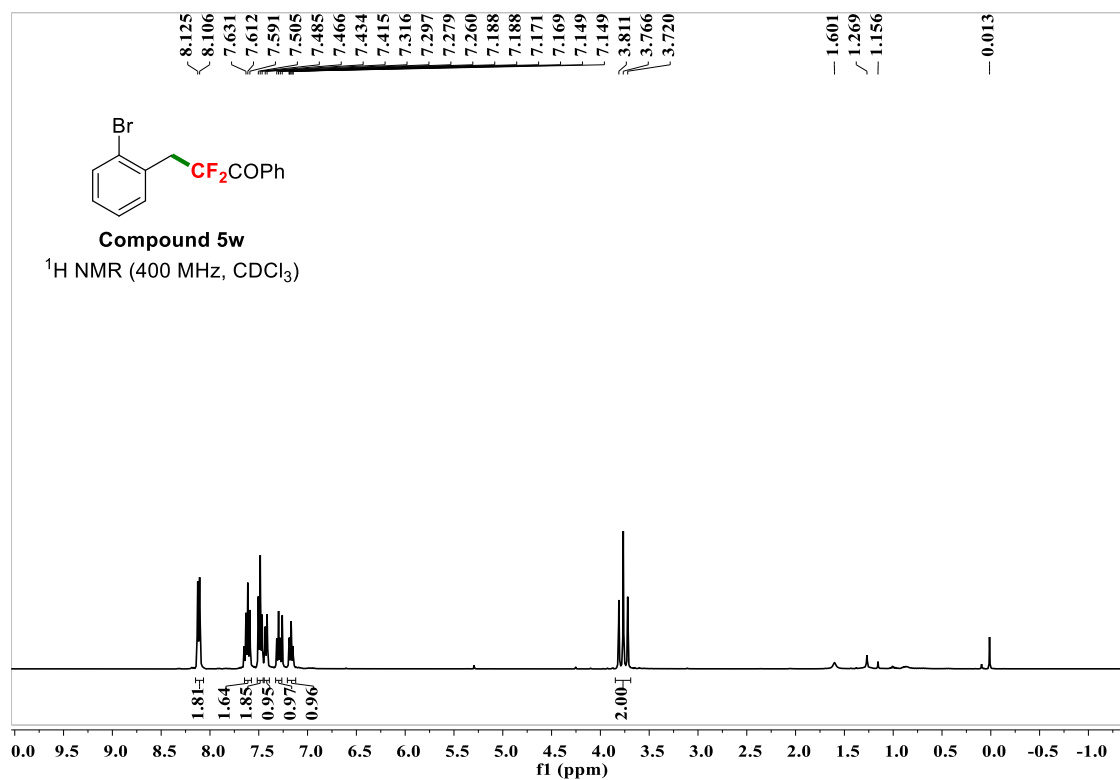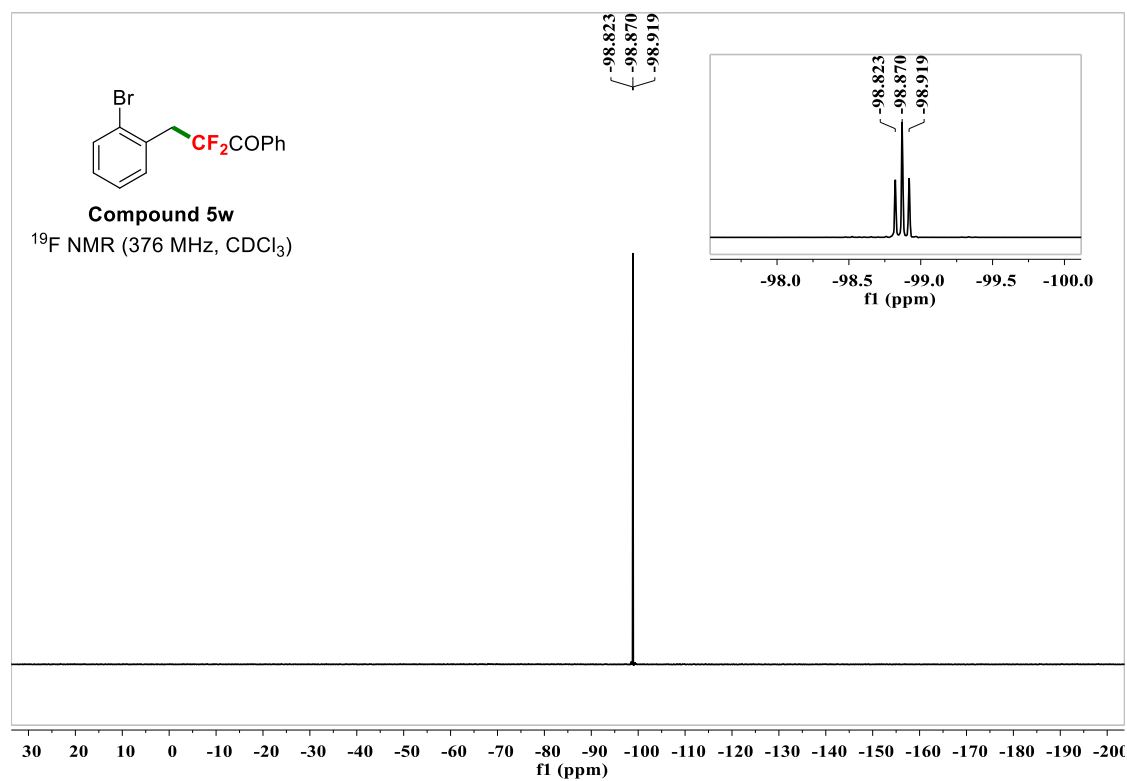

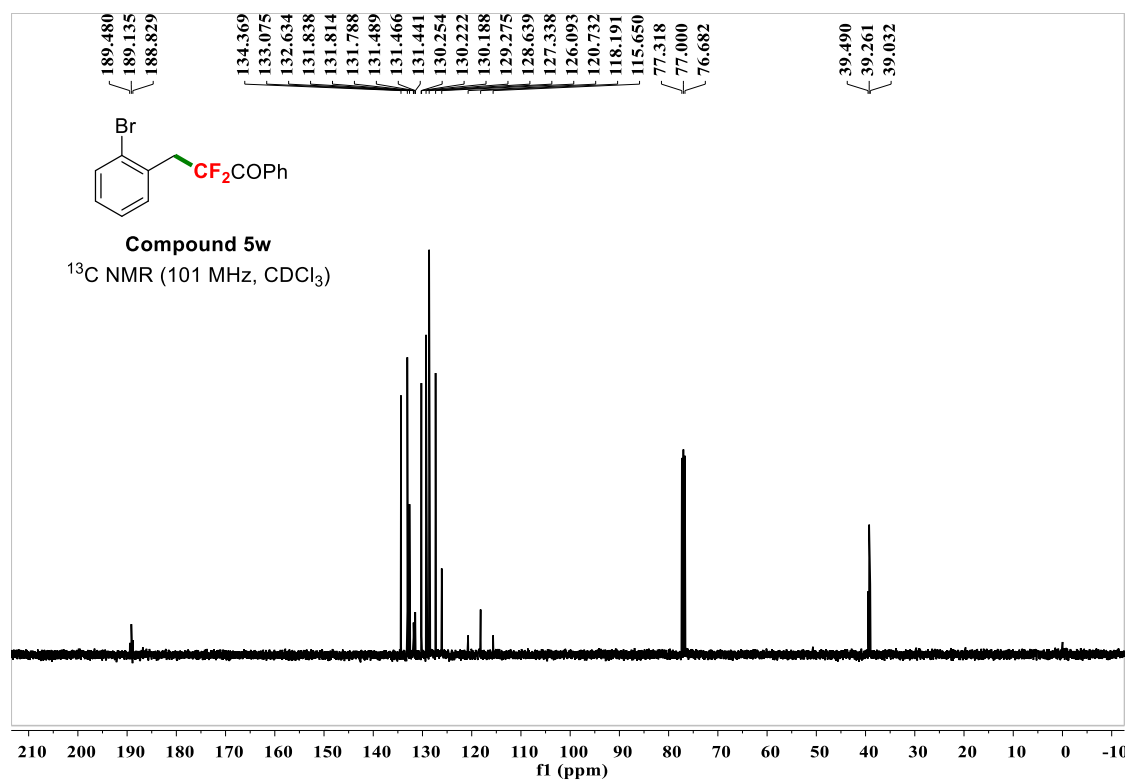

**2,2-Difluoro-1-phenyl-3-(2-(trifluoromethyl)phenyl)propan-1-one (5x).**

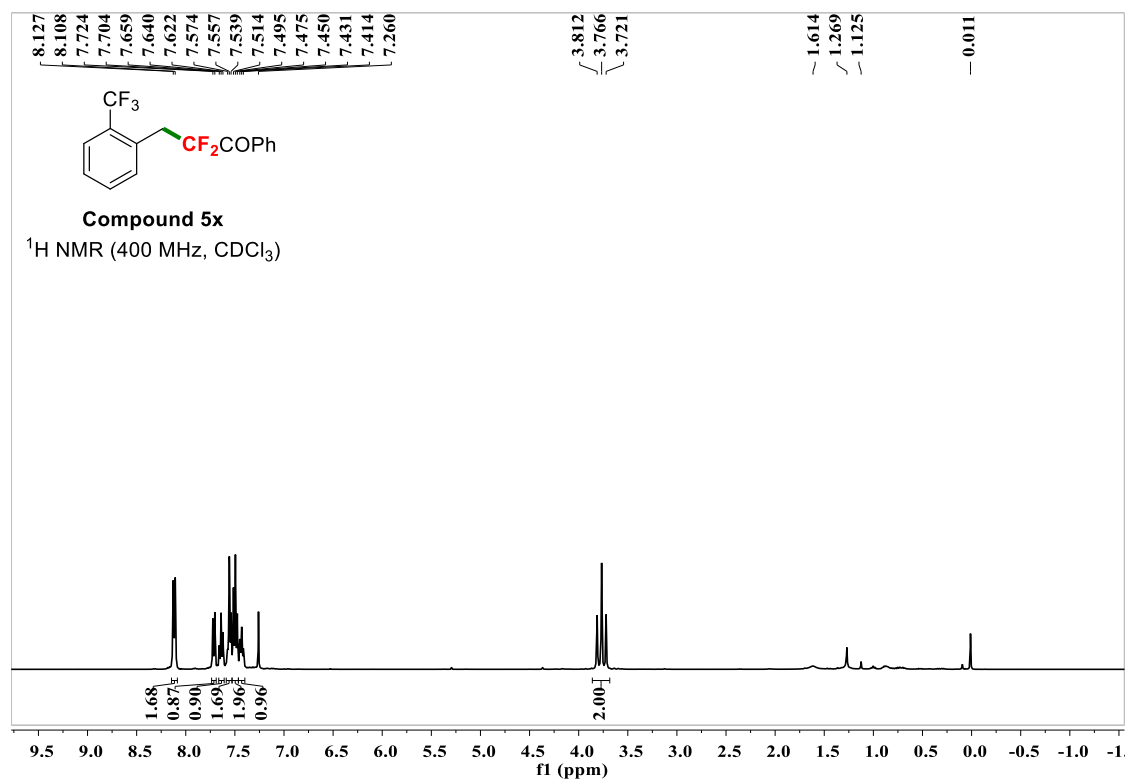

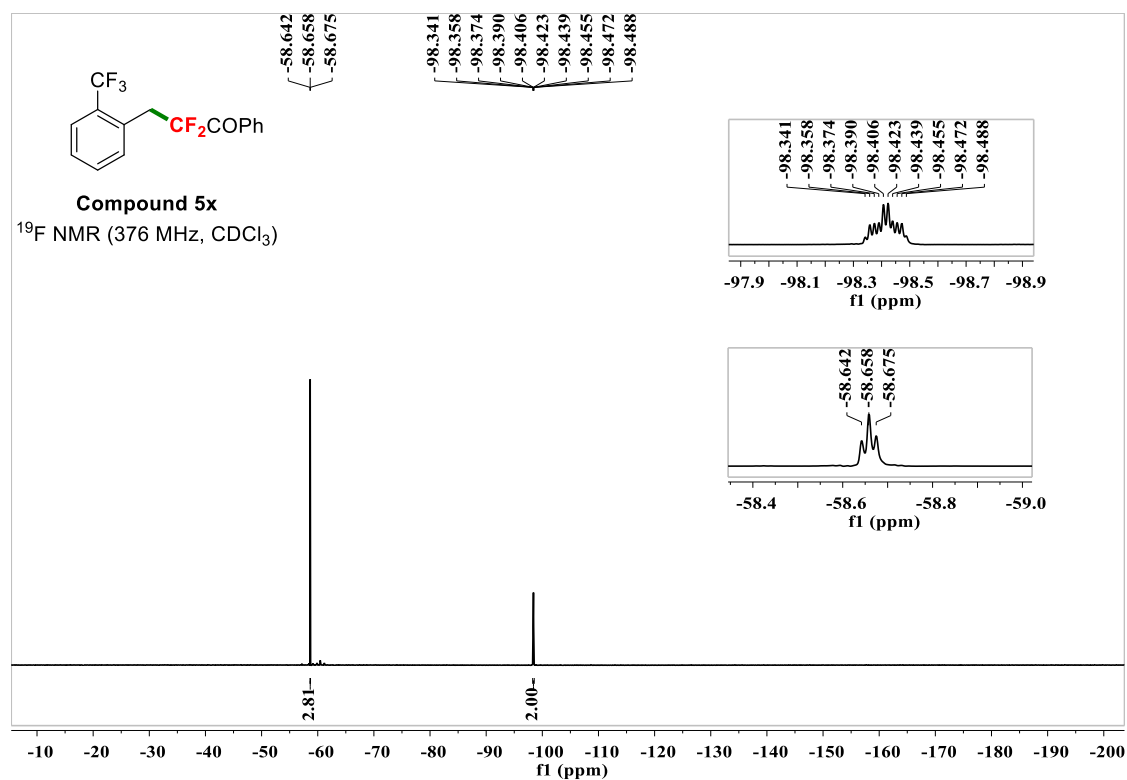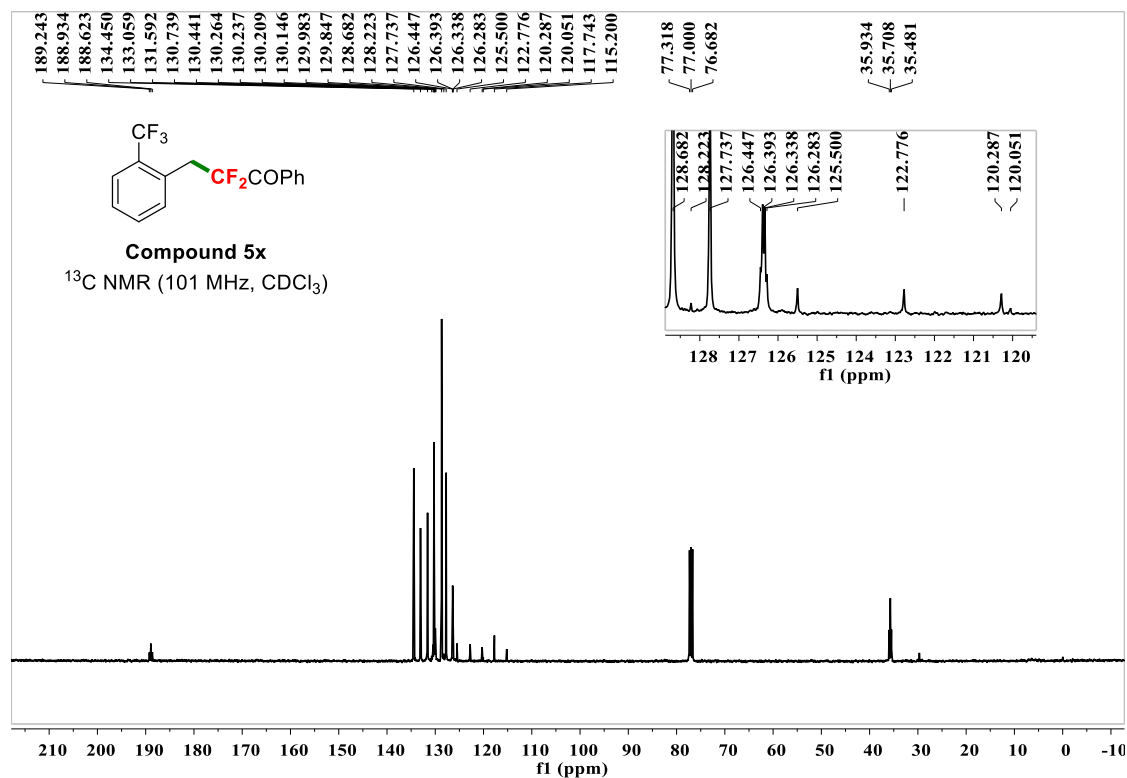

**2,2-Difluoro-1-phenyl-3-(o-tolyl)propan-1-one (5y).**

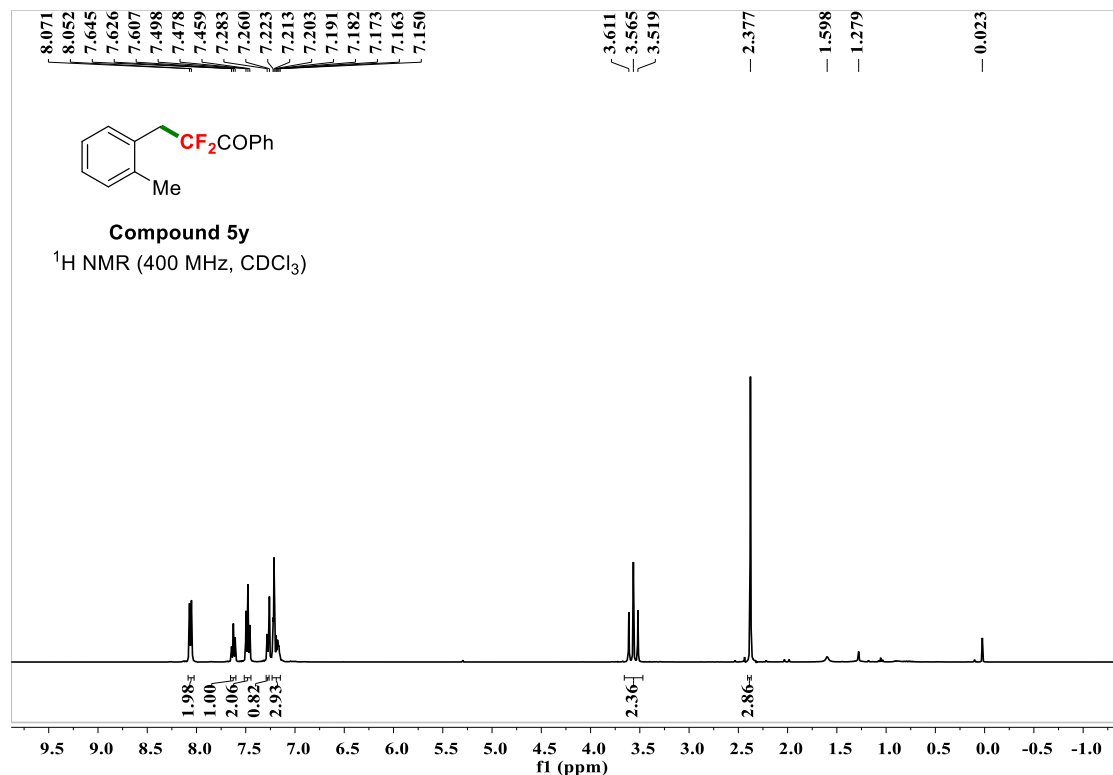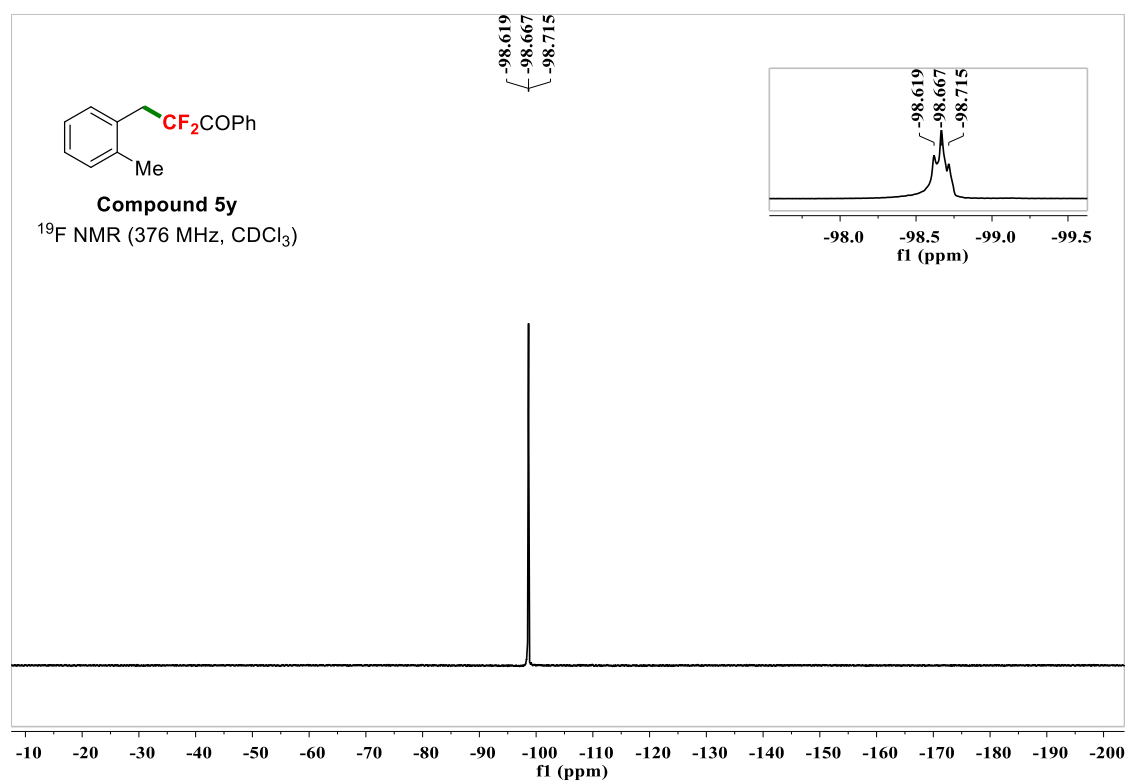

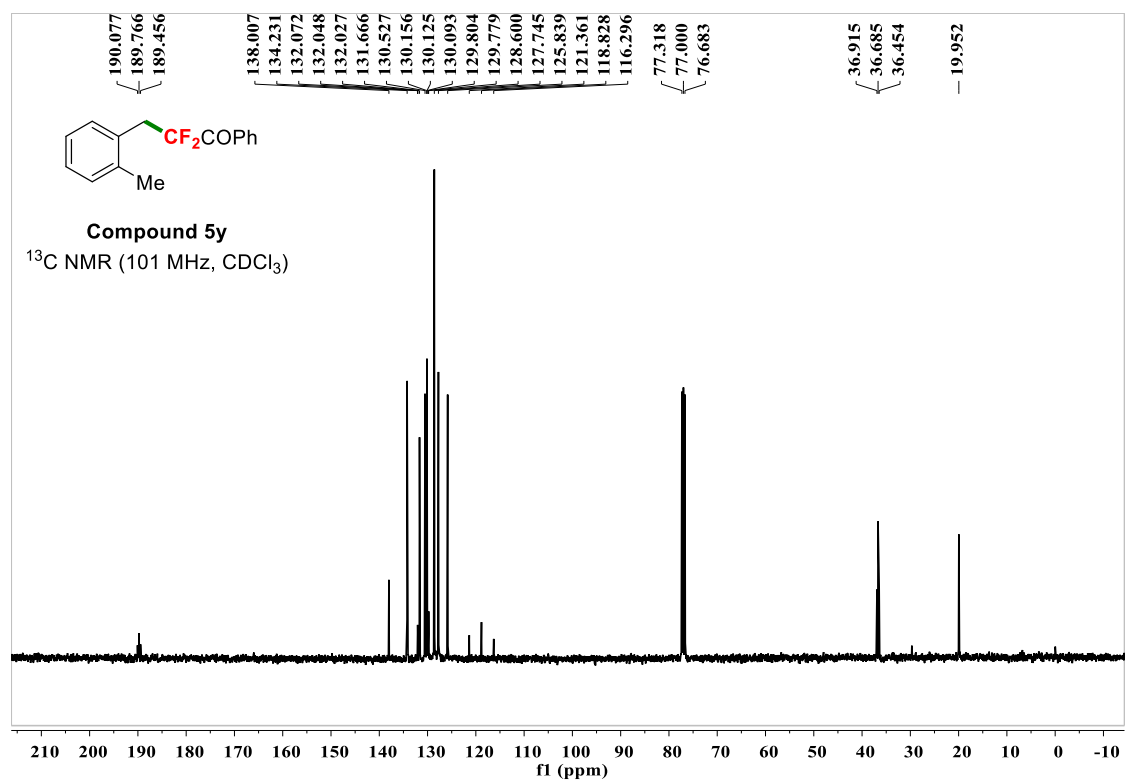

**2,2-Difluoro-3-(4-fluorophenyl)-1-phenylpropan-1-one (5z).**

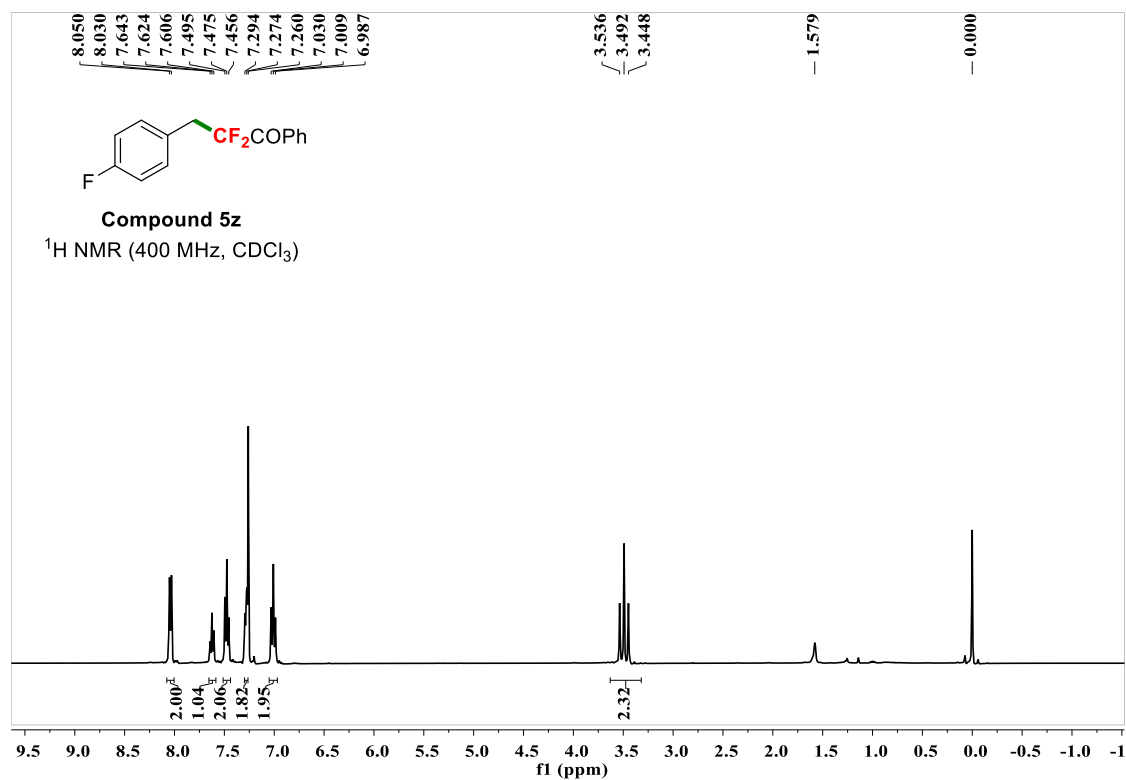

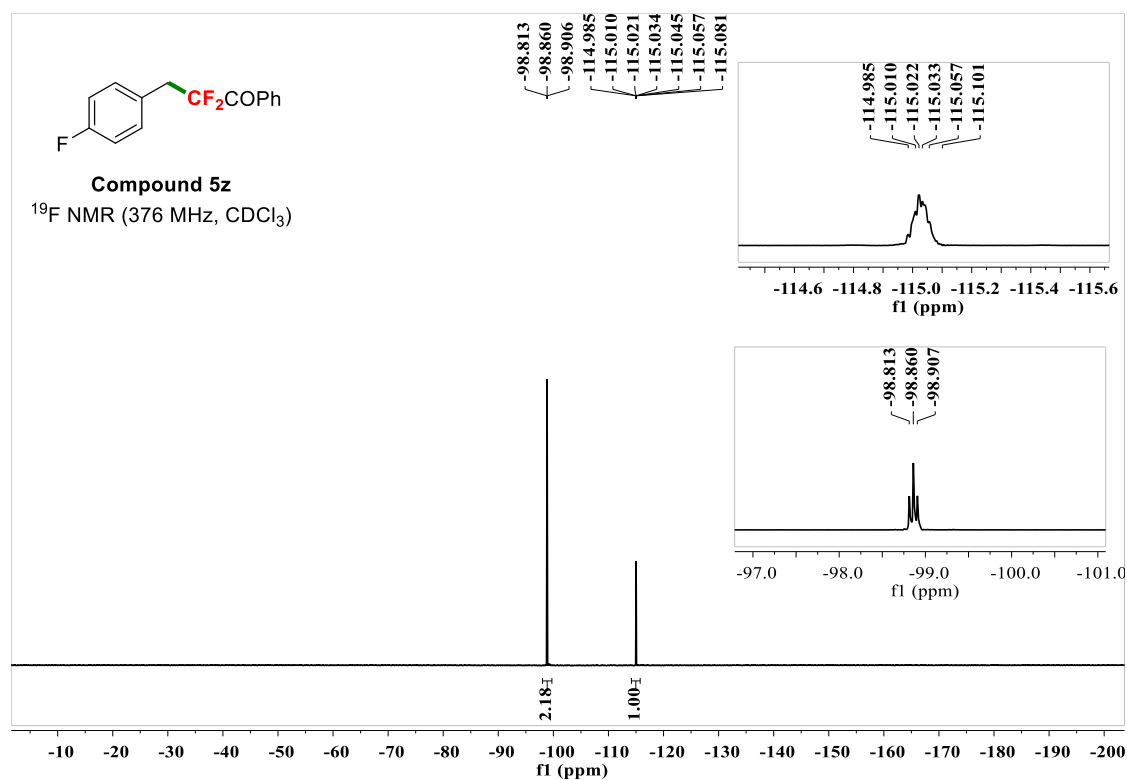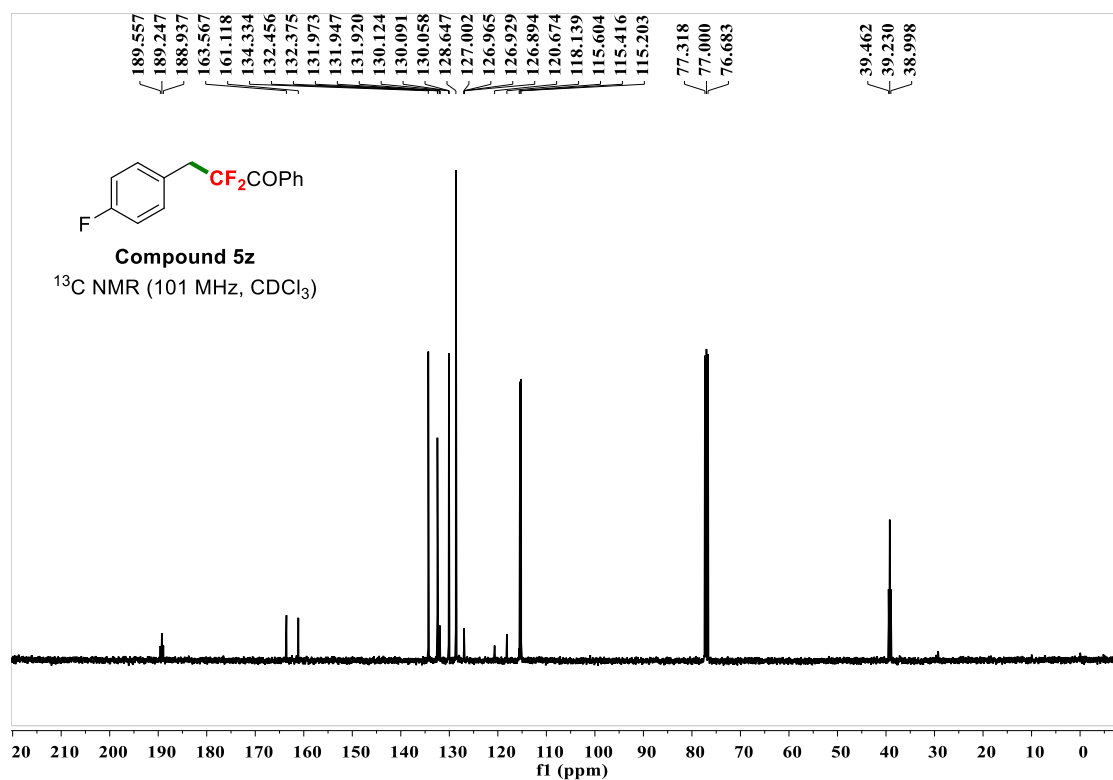



### 3-(4-Chlorophenyl)-2,2-difluoro-1-phenylpropan-1-one (5aa).

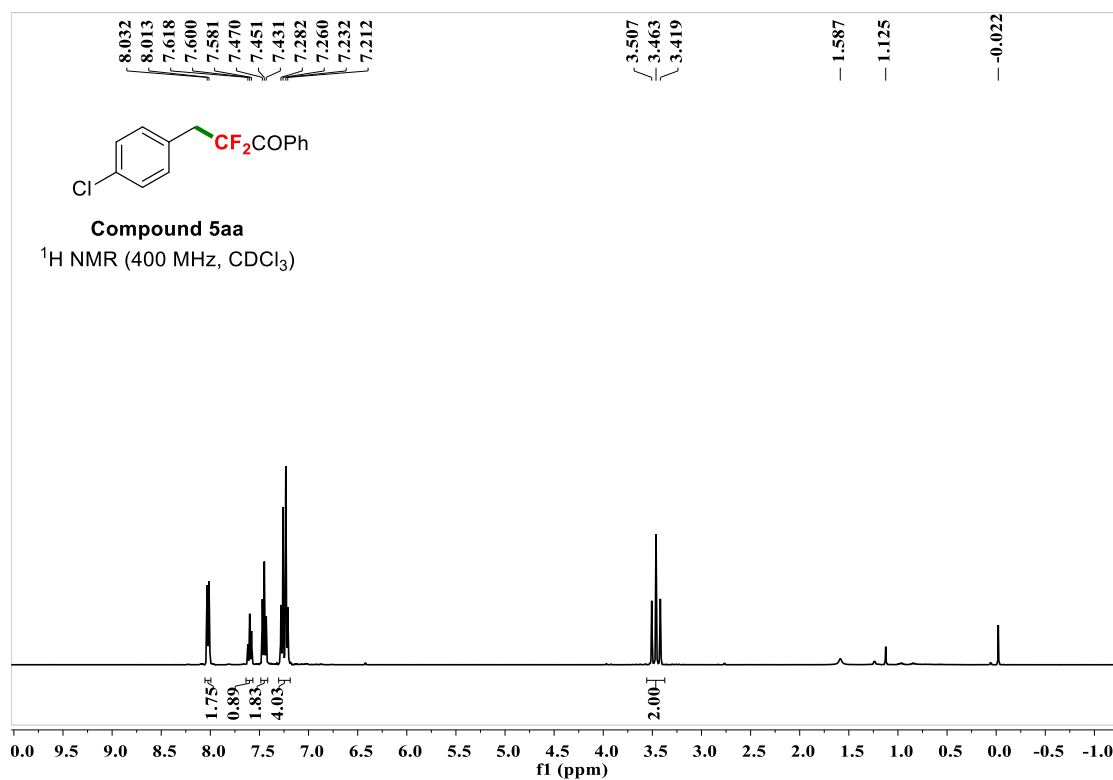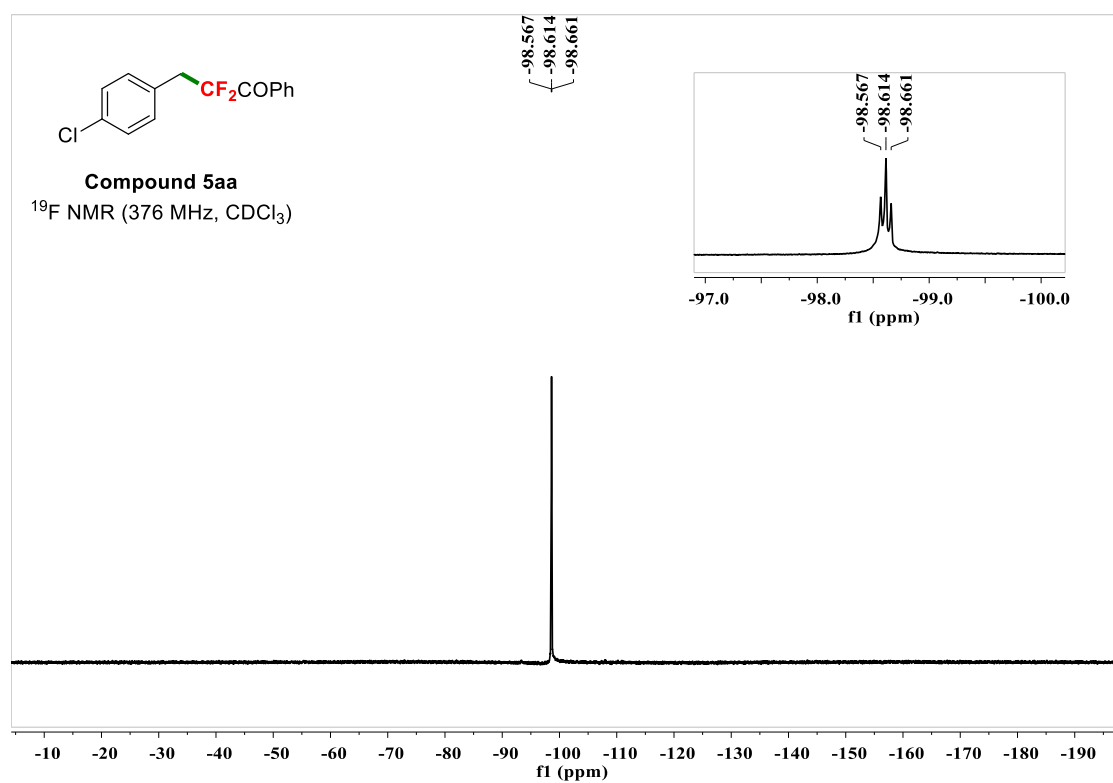



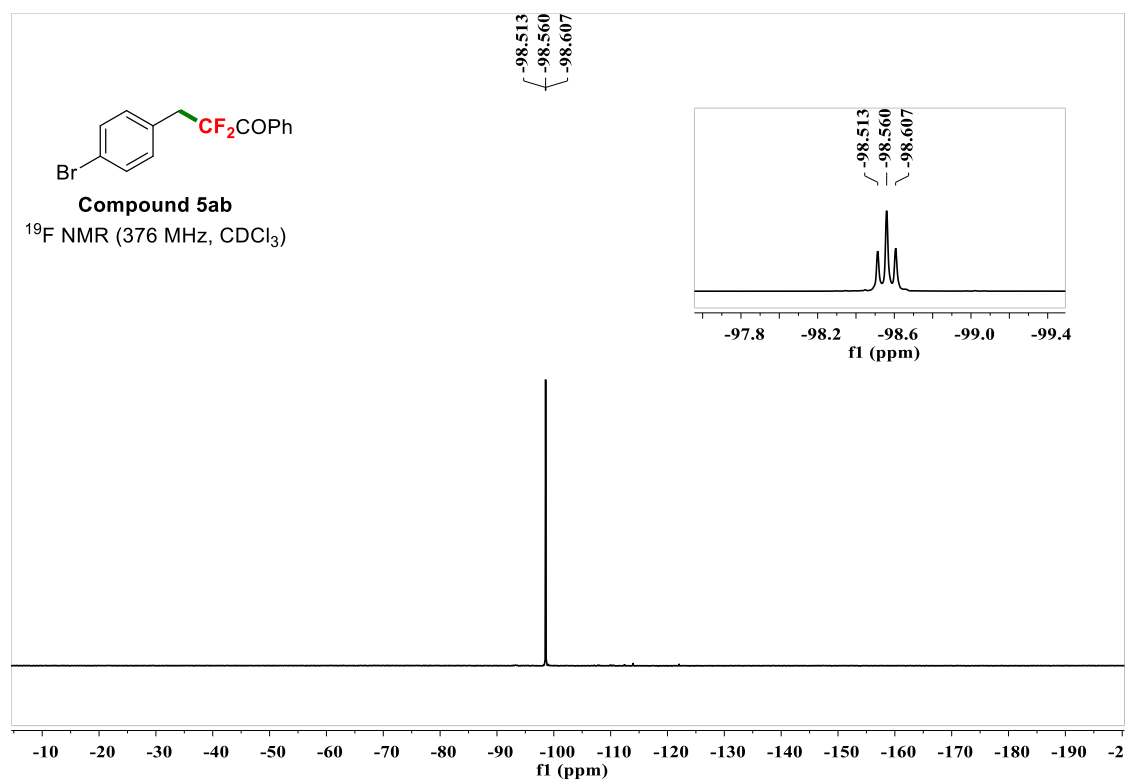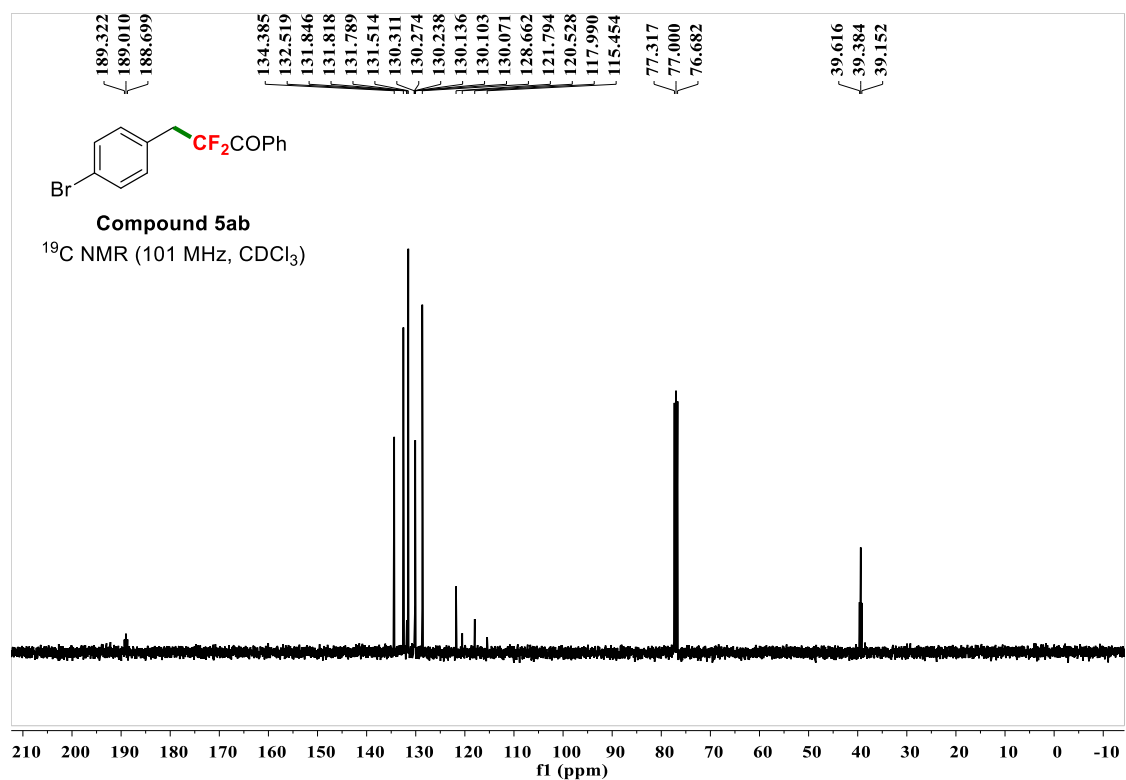

**4-(2,2-Difluoro-3-oxo-3-phenylpropyl)benzonitrile (5ac).**

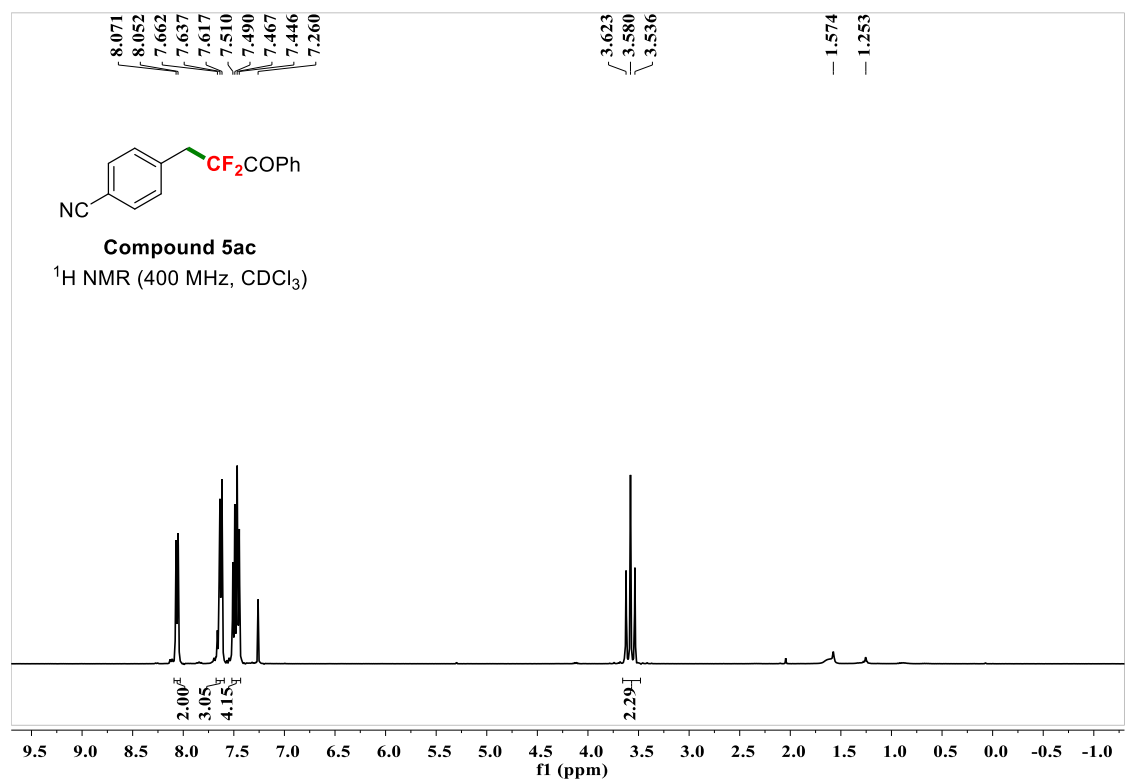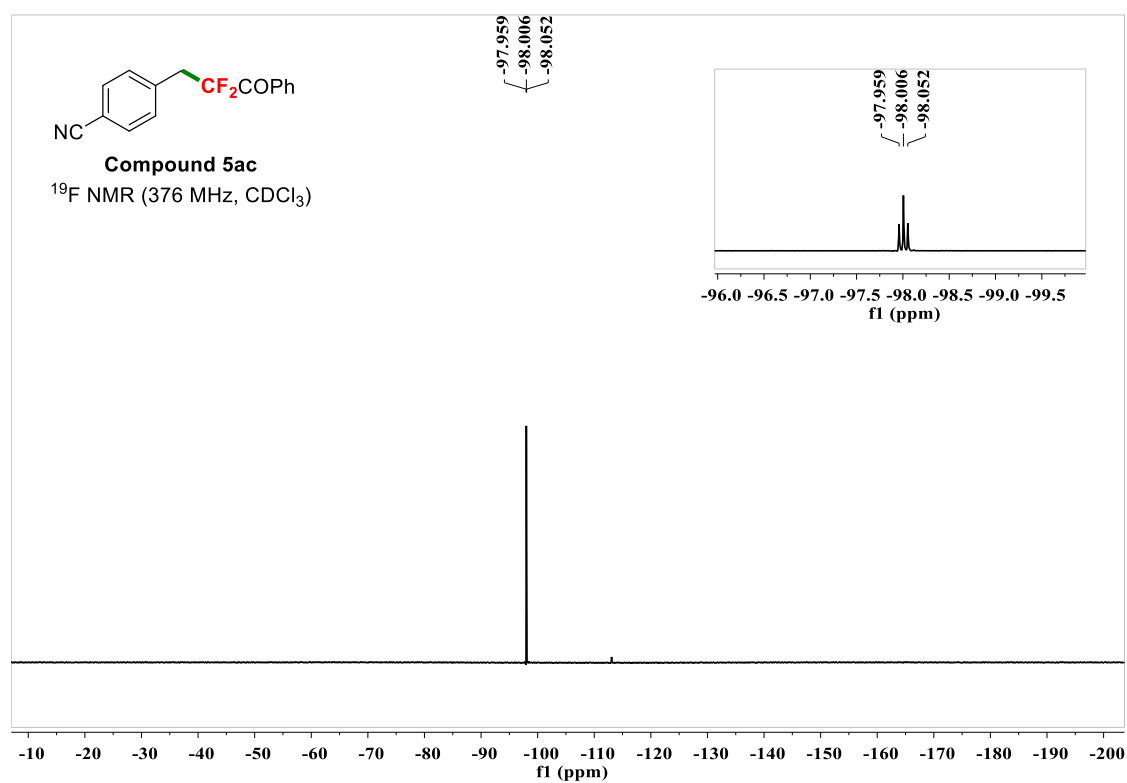

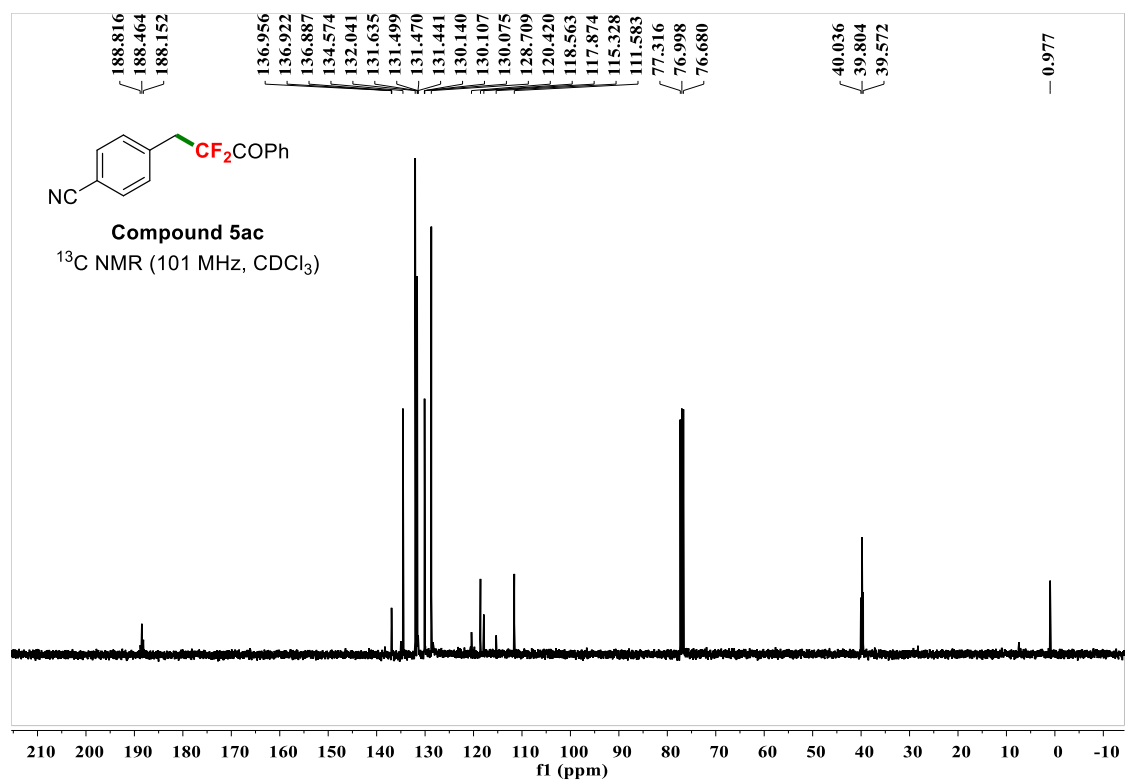

**Methyl 4-(2,2-difluoro-3-oxo-3-phenylpropyl)benzoate (5ad).**

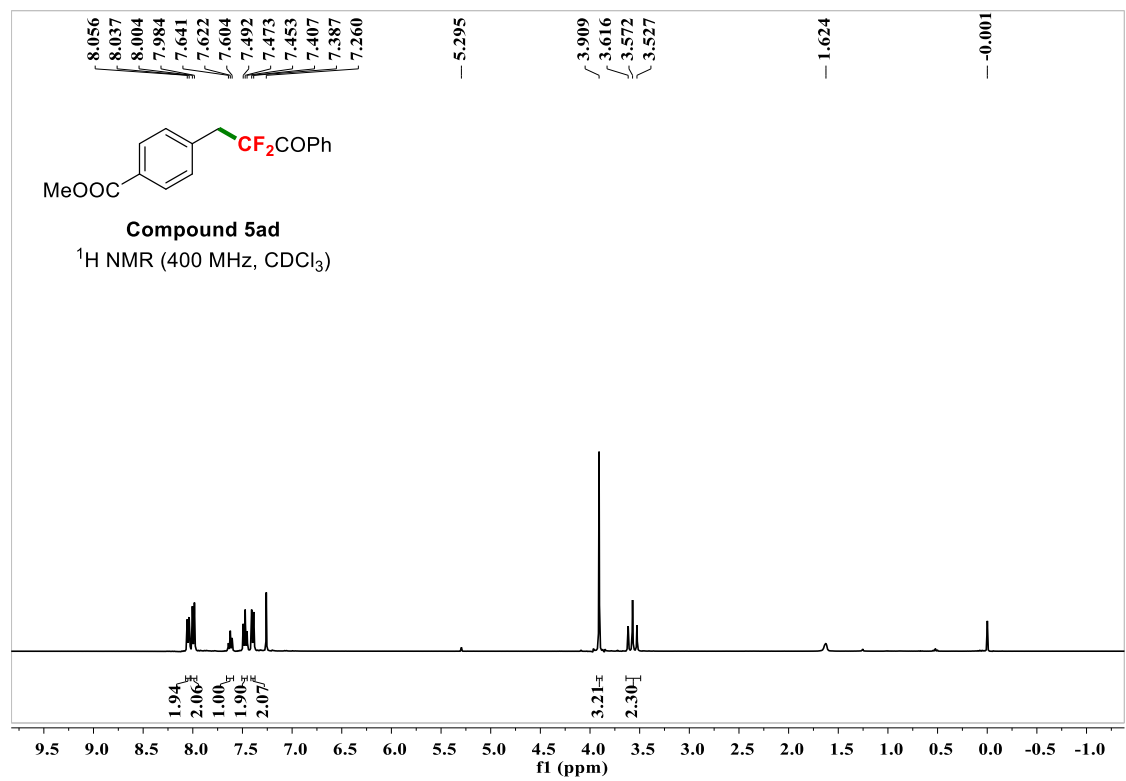

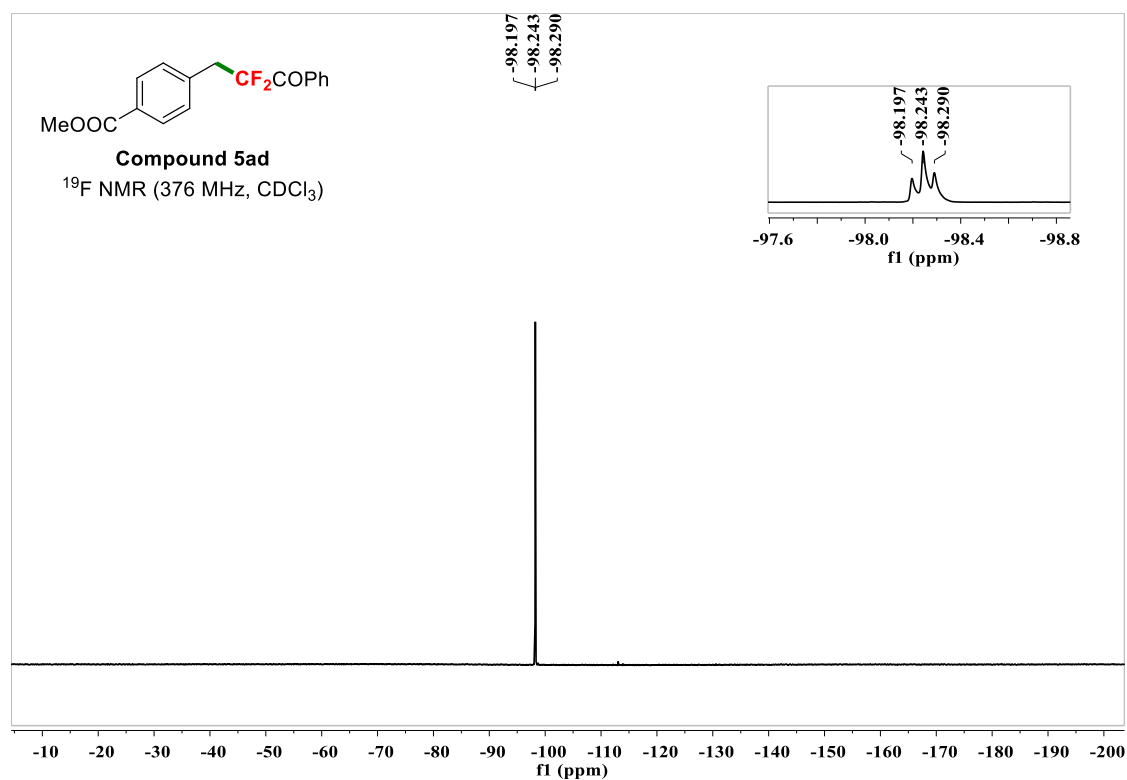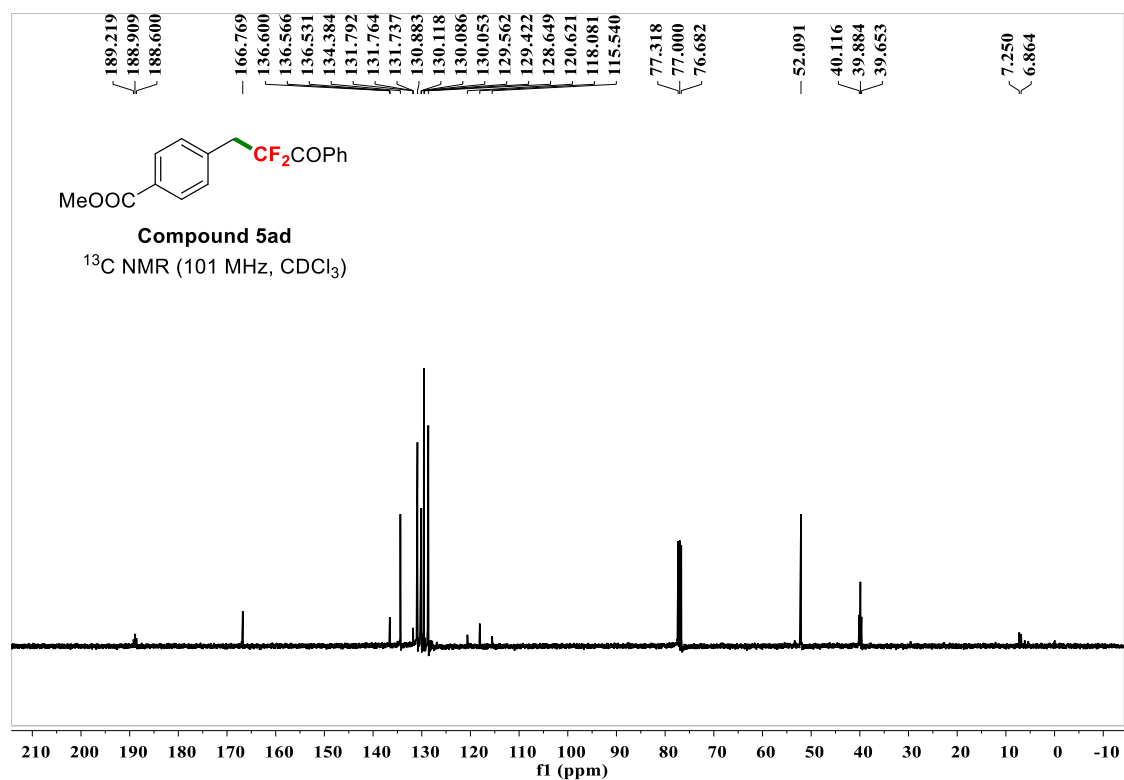

**2,2-Difluoro-1-phenyl-3-(p-tolyl)propan-1-one (5ae).**

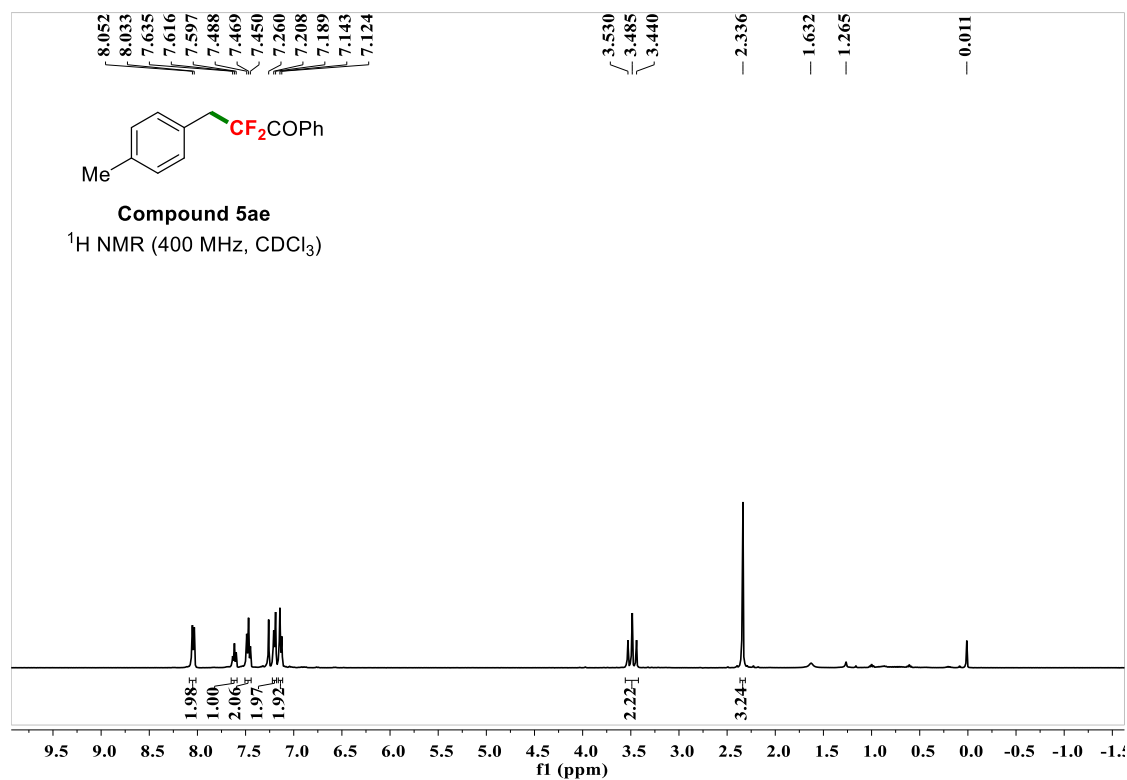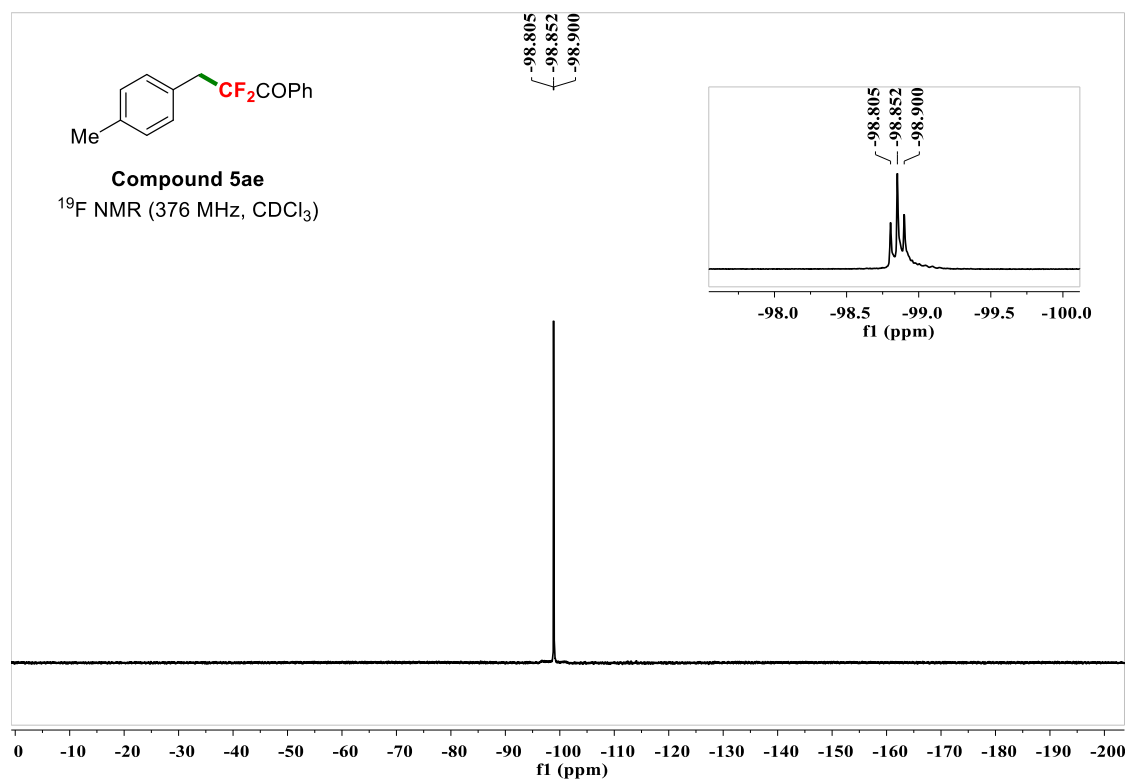

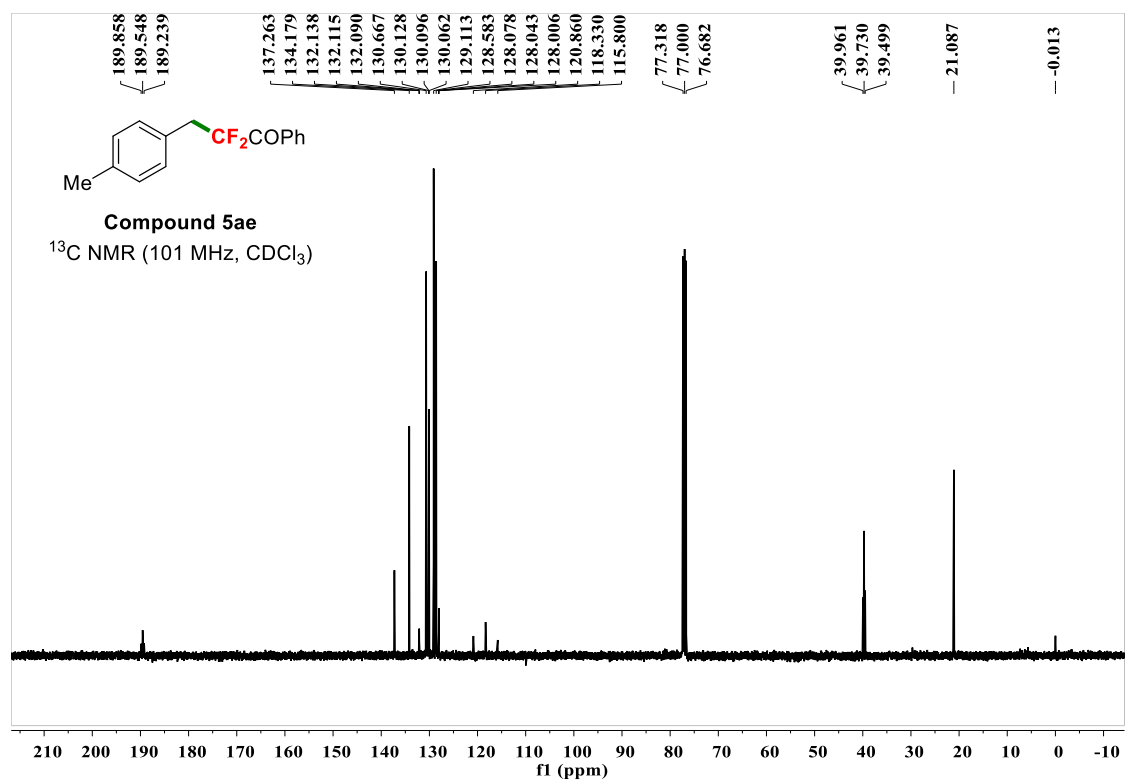

**2,2-Difluoro-1-phenyl-3-(3-(trifluoromethyl)phenyl)propan-1-one (5af).**

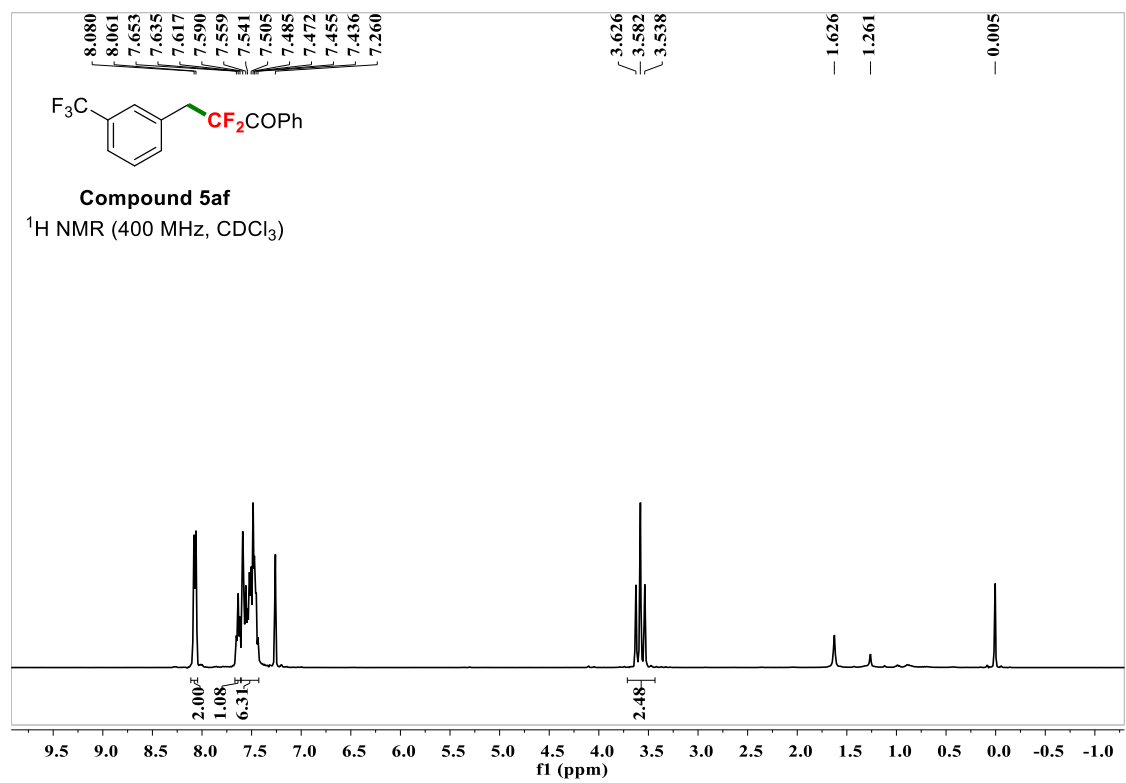



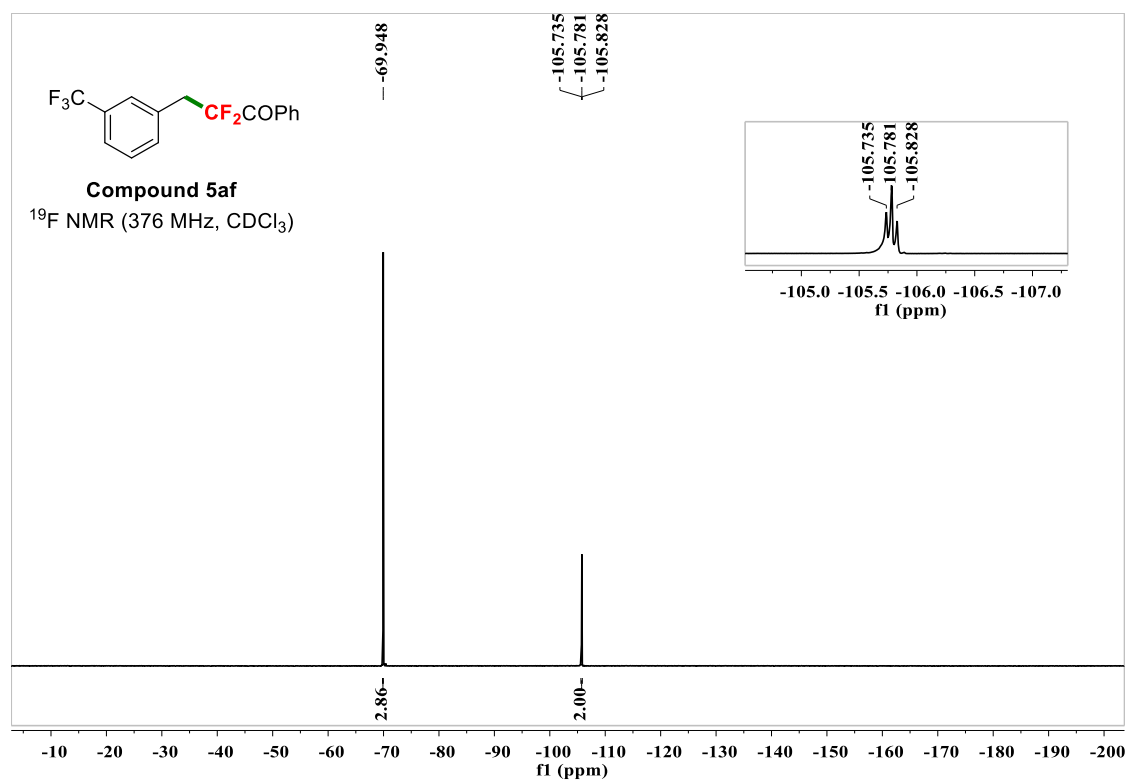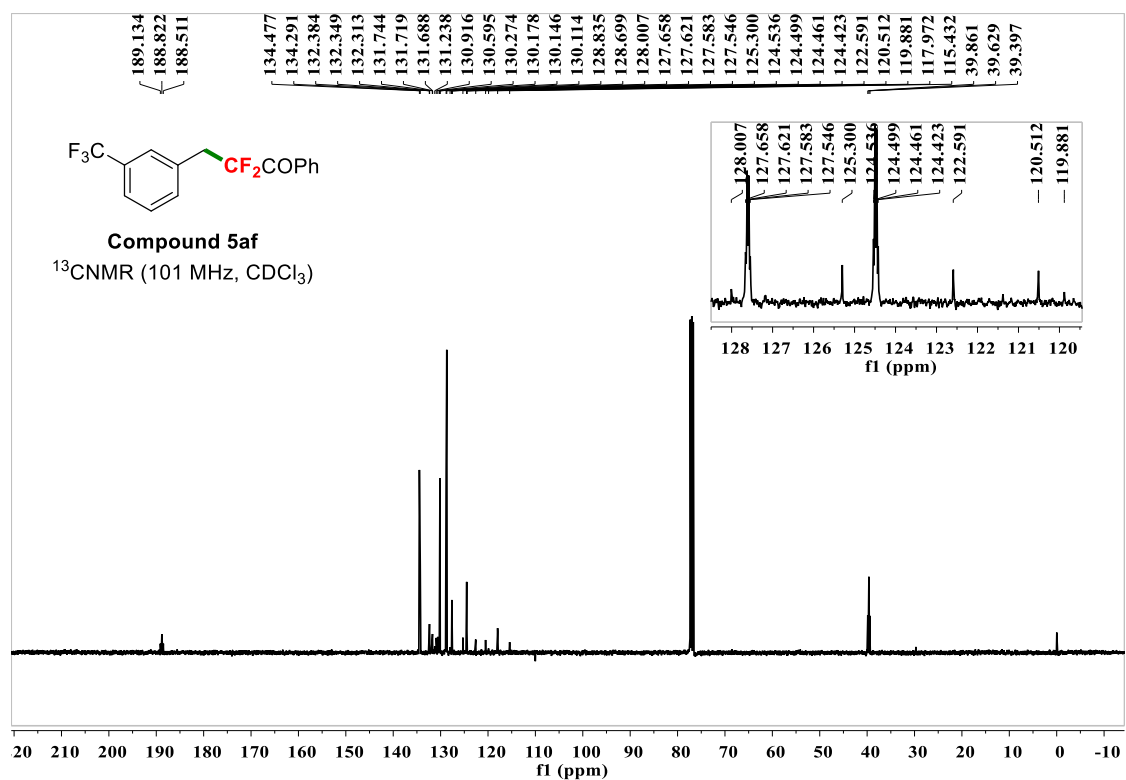

**2,2-Difluoro-1-phenyl-3-(pyridin-3-yl)propan-1-one (5ag).**

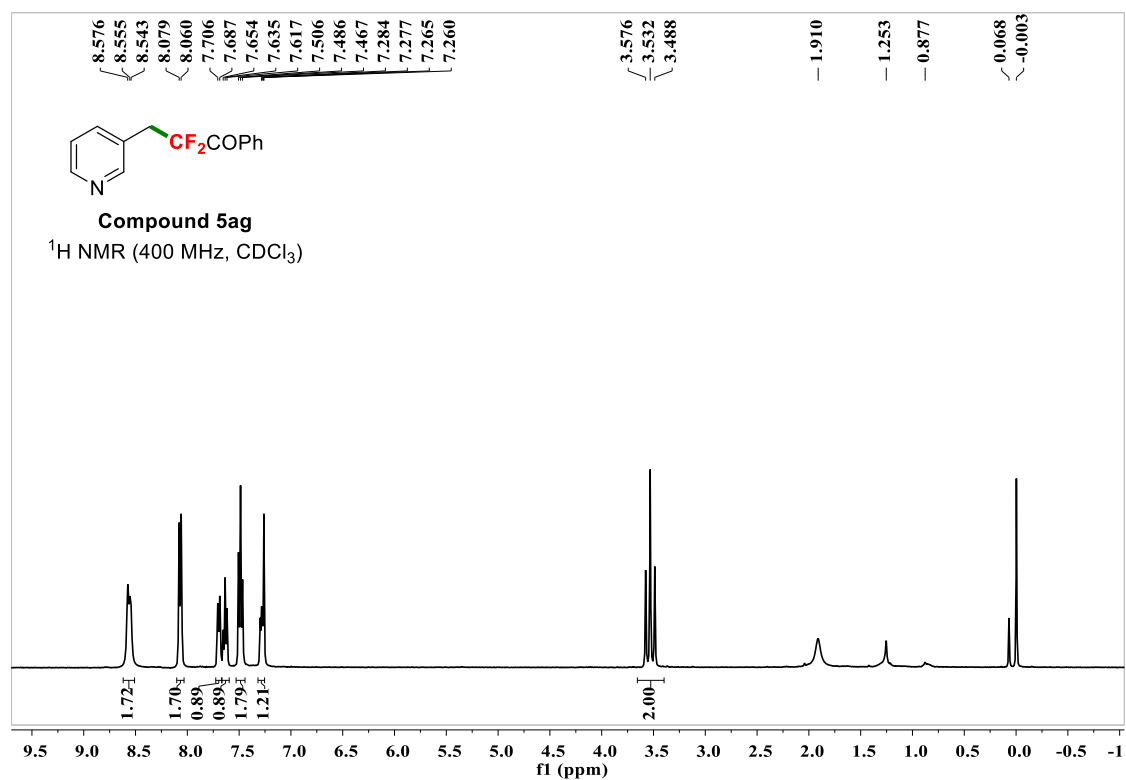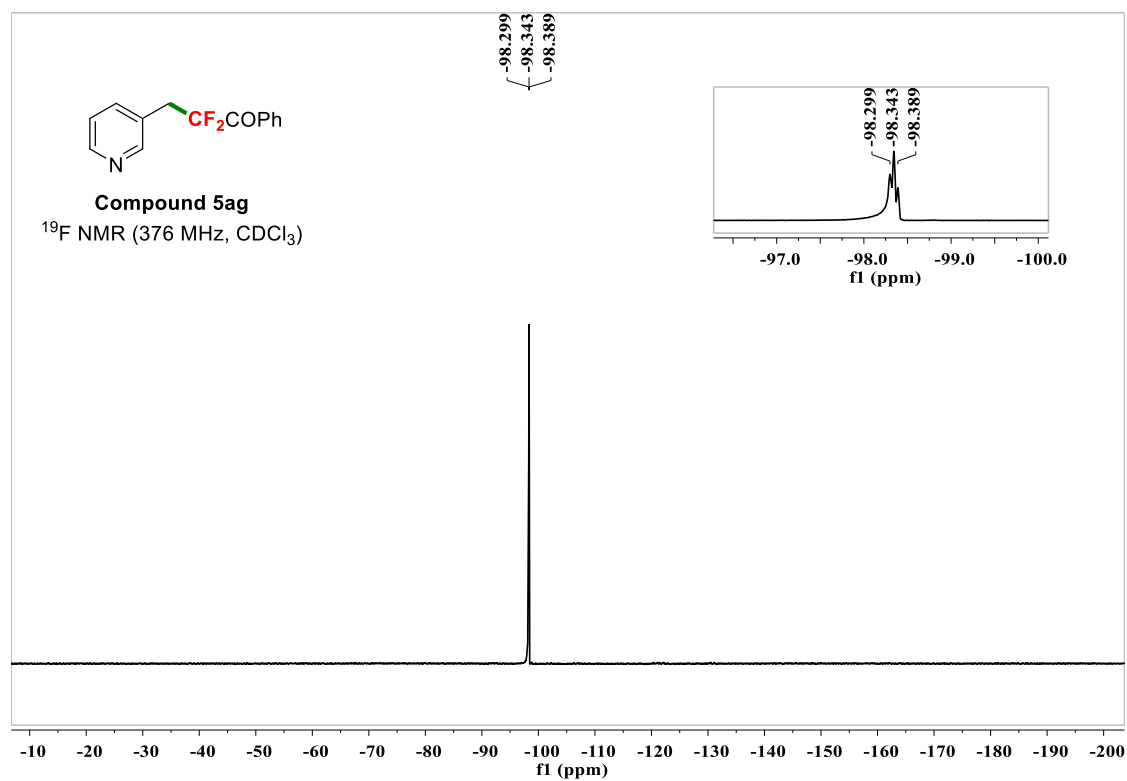

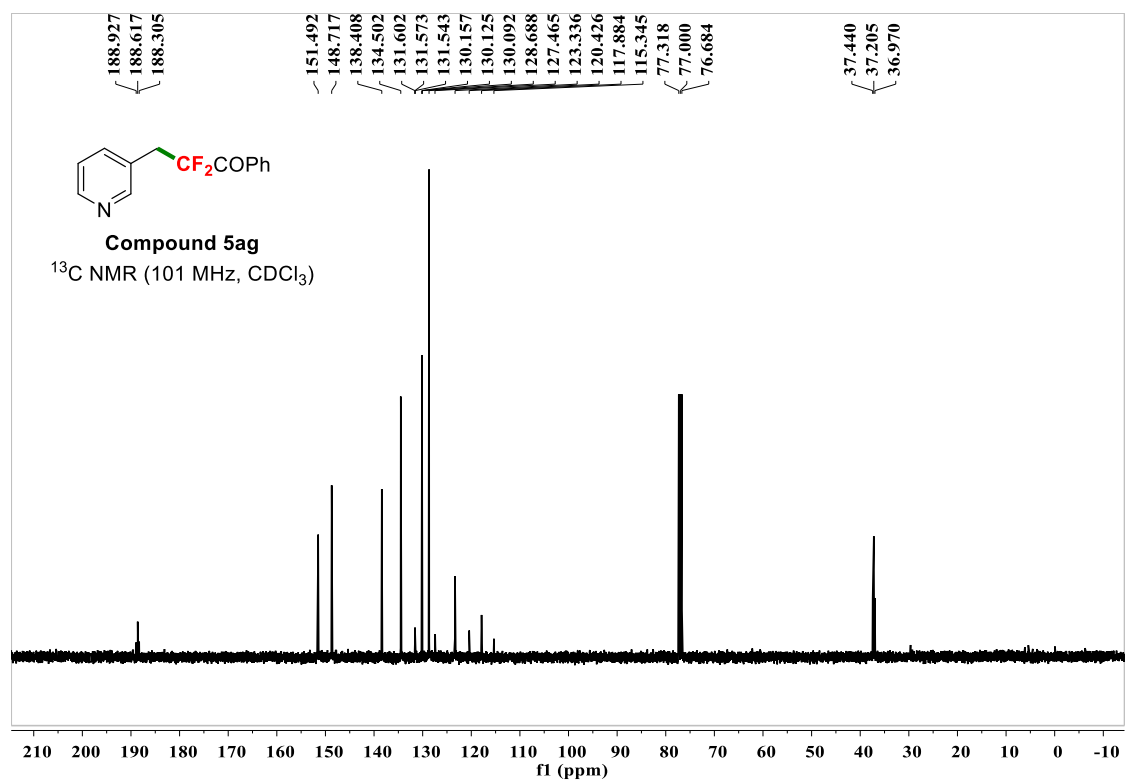

**2,2-Difluoro-1-phenyl-3-(pyridin-3-yl)butan-1-one (5ah).**

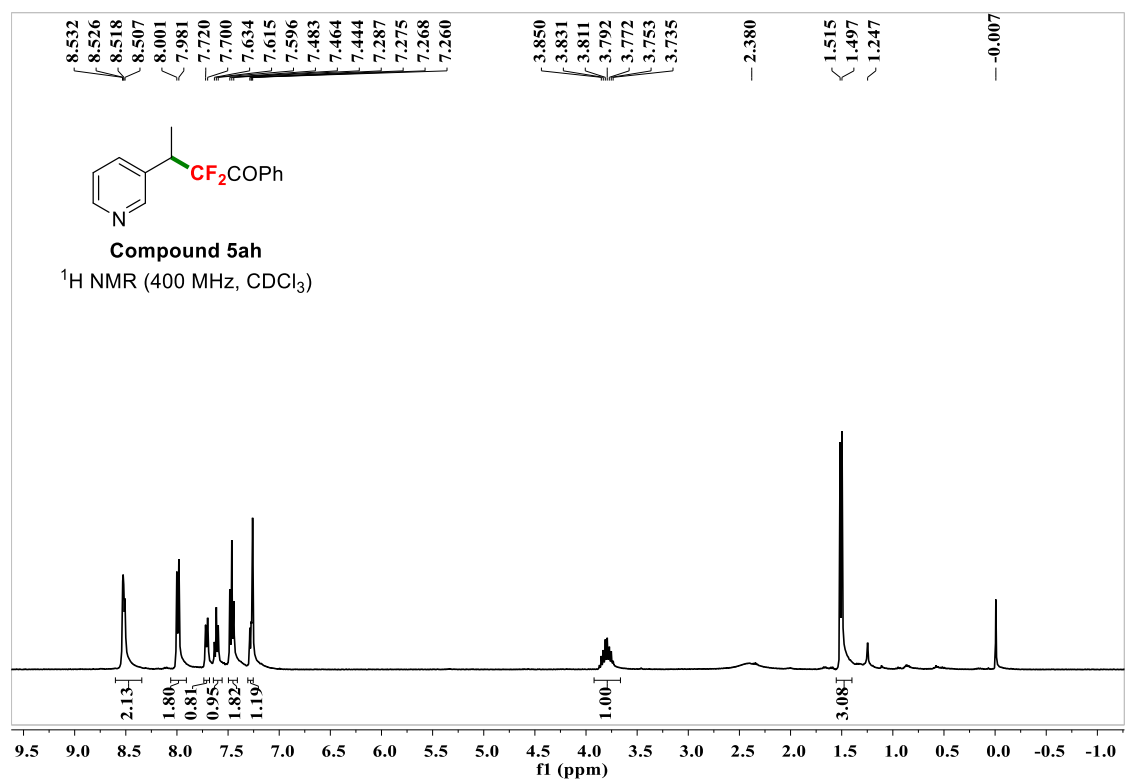

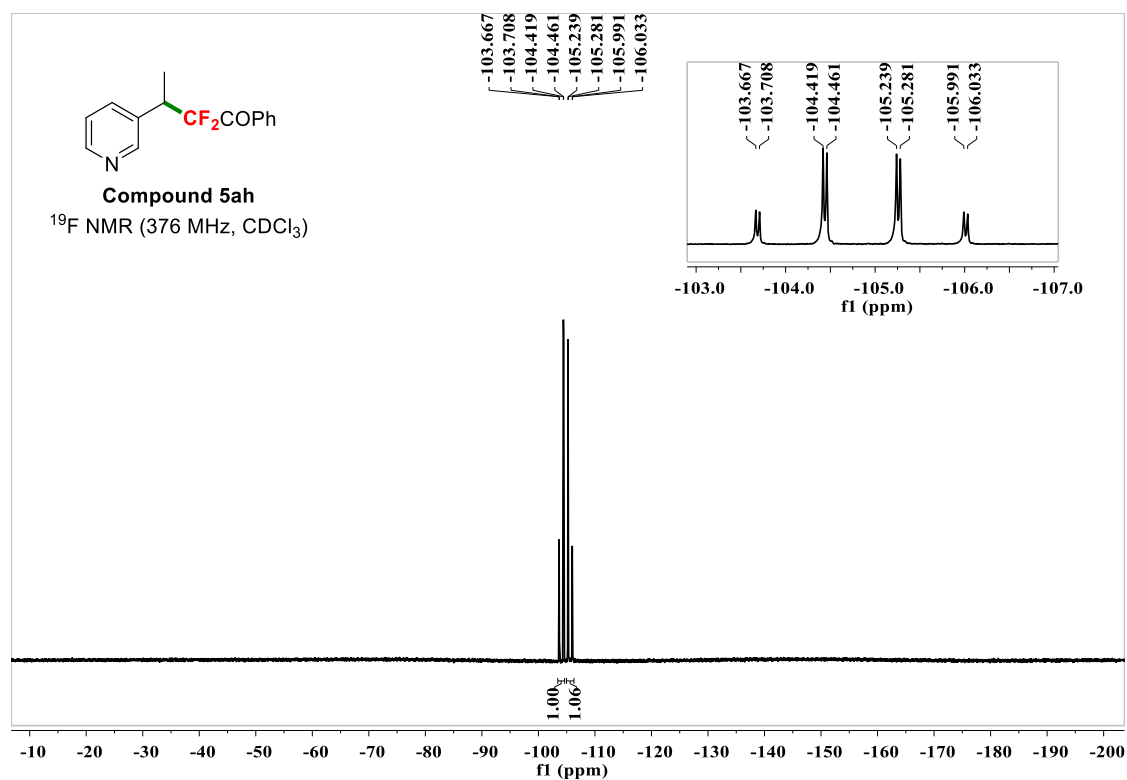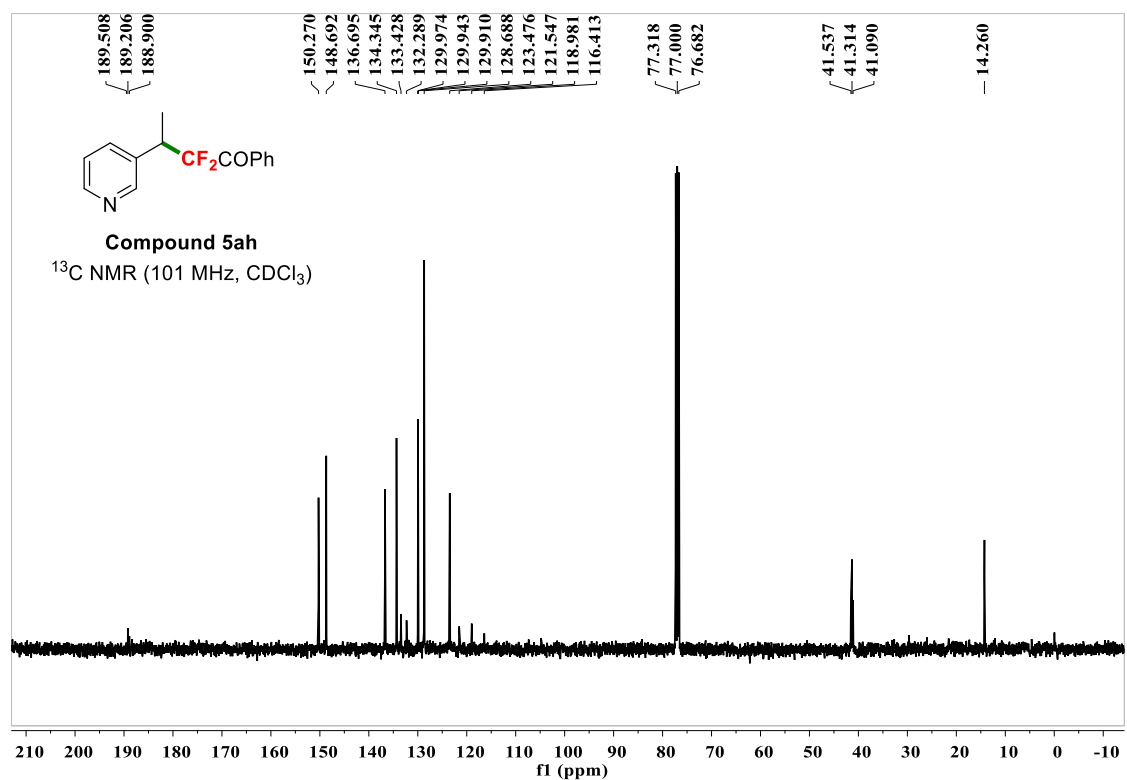

**(Difluoromethyl)cyclododecane (6e).**

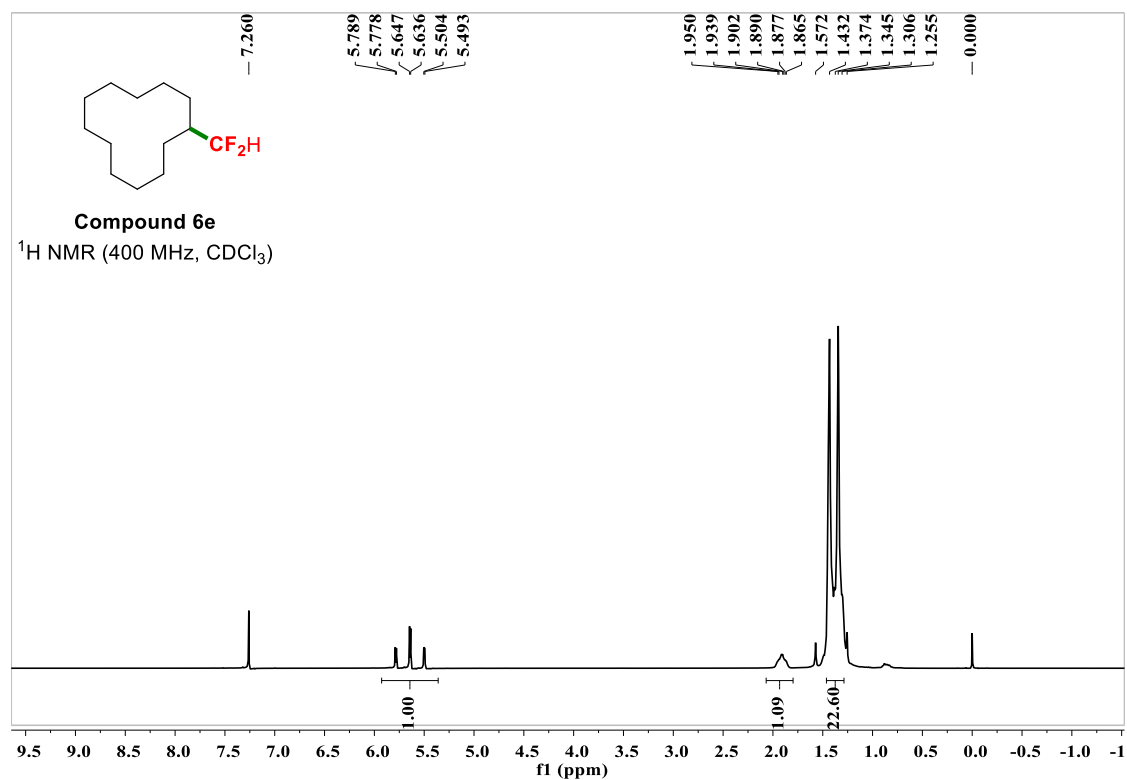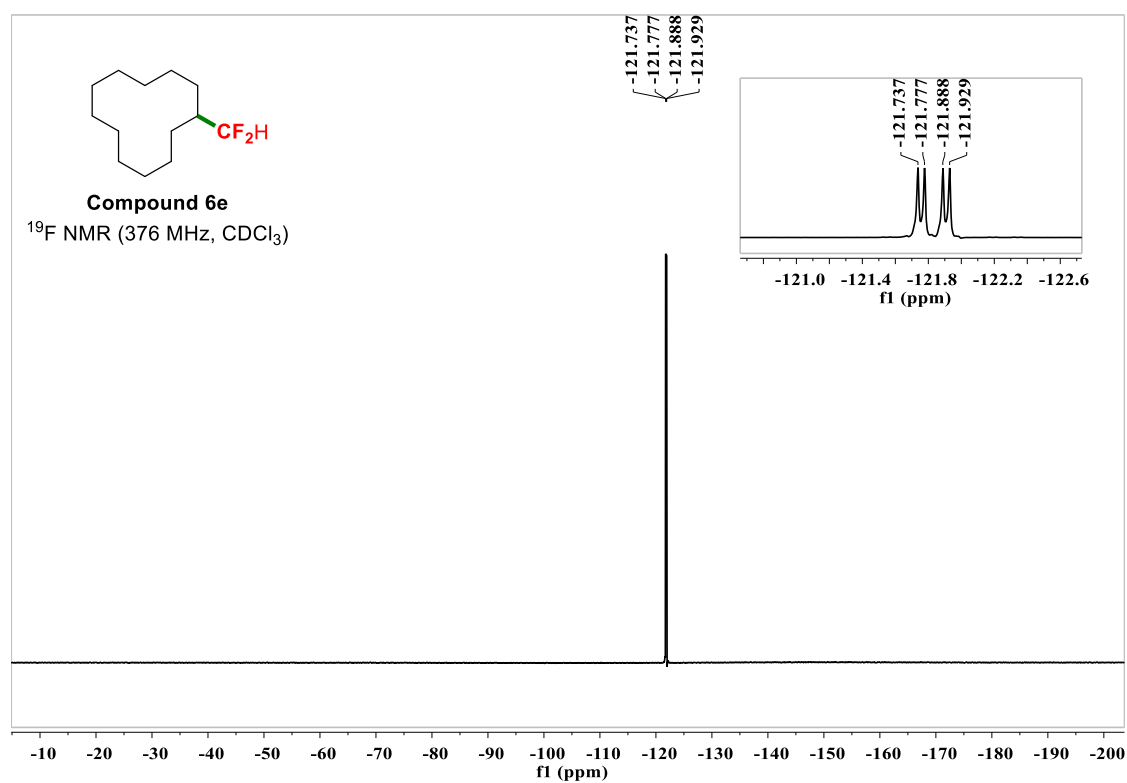

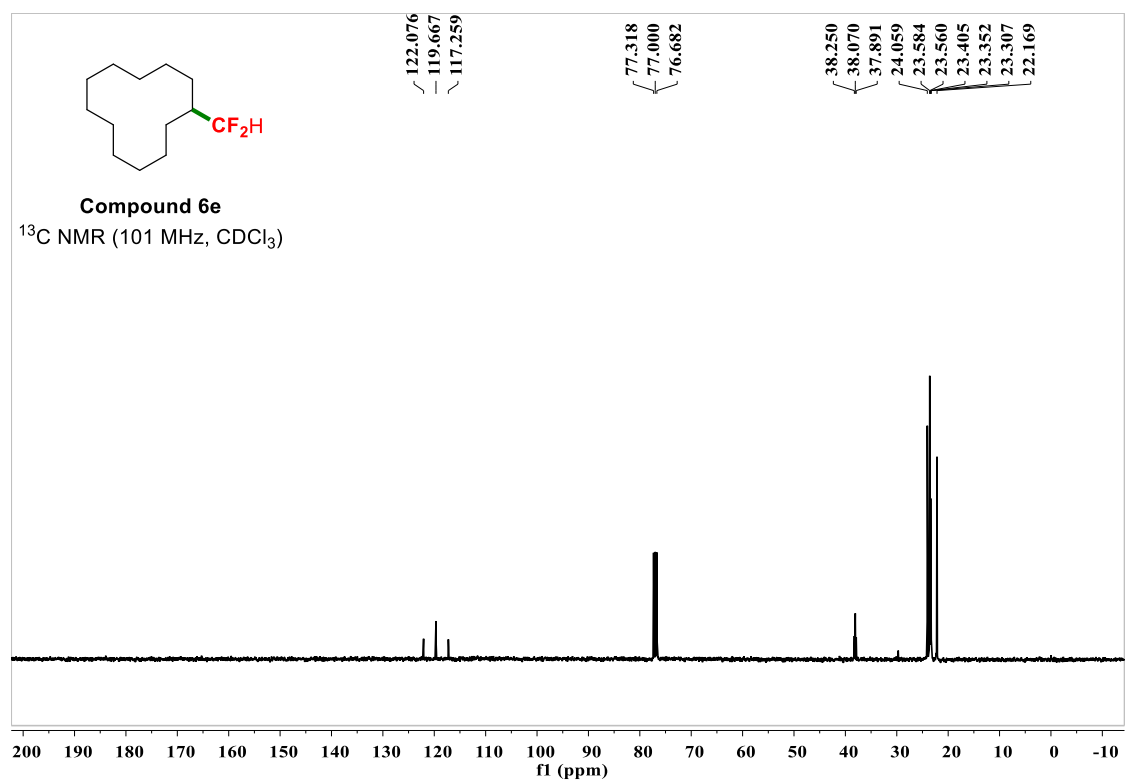

**Tert-butyl 4-(difluoromethyl)piperidine-1-carboxylate (6i).**

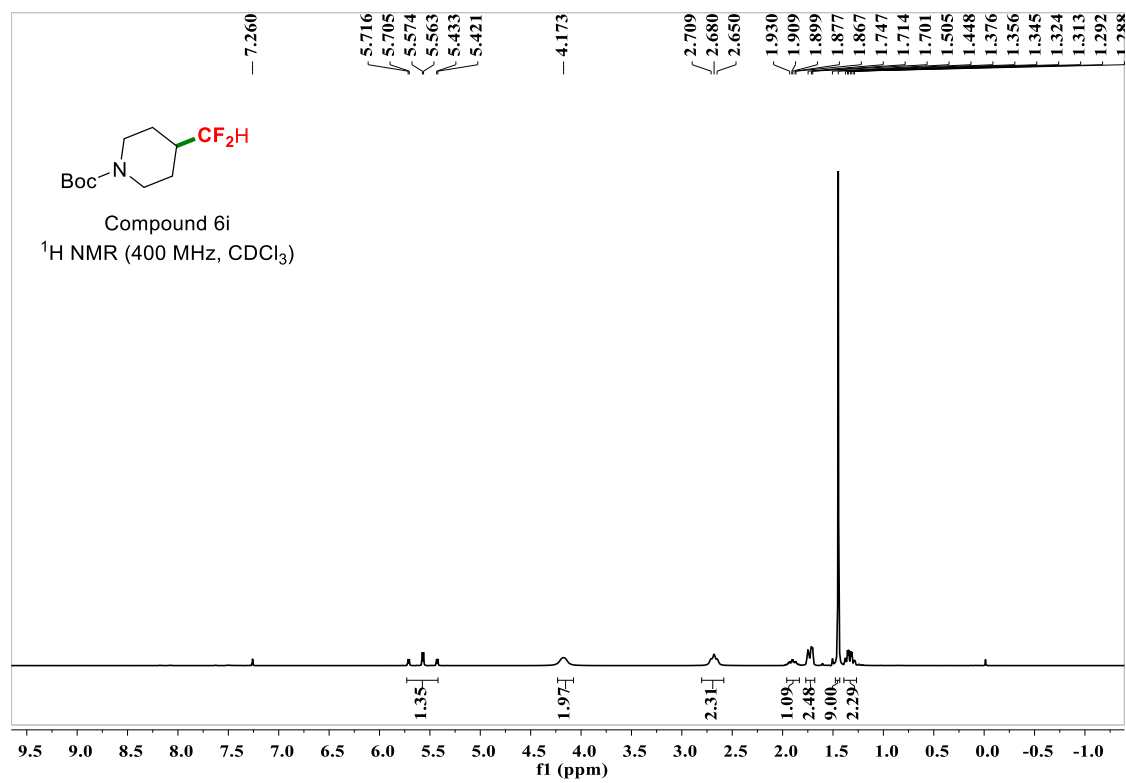

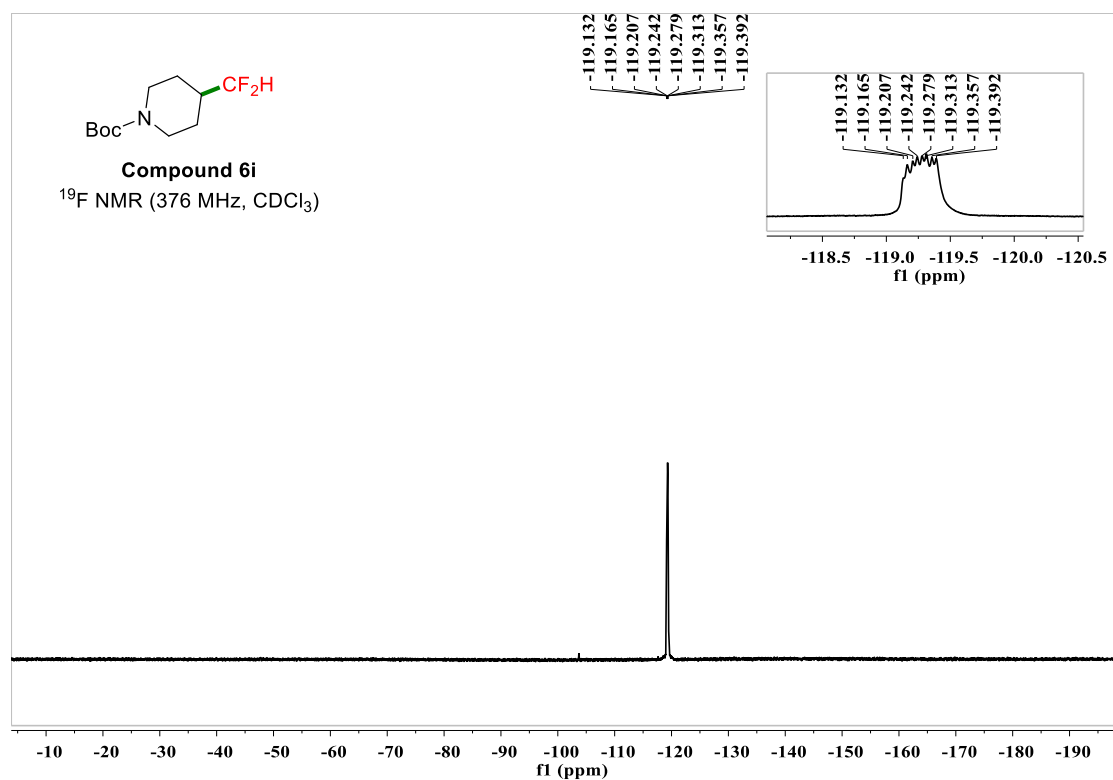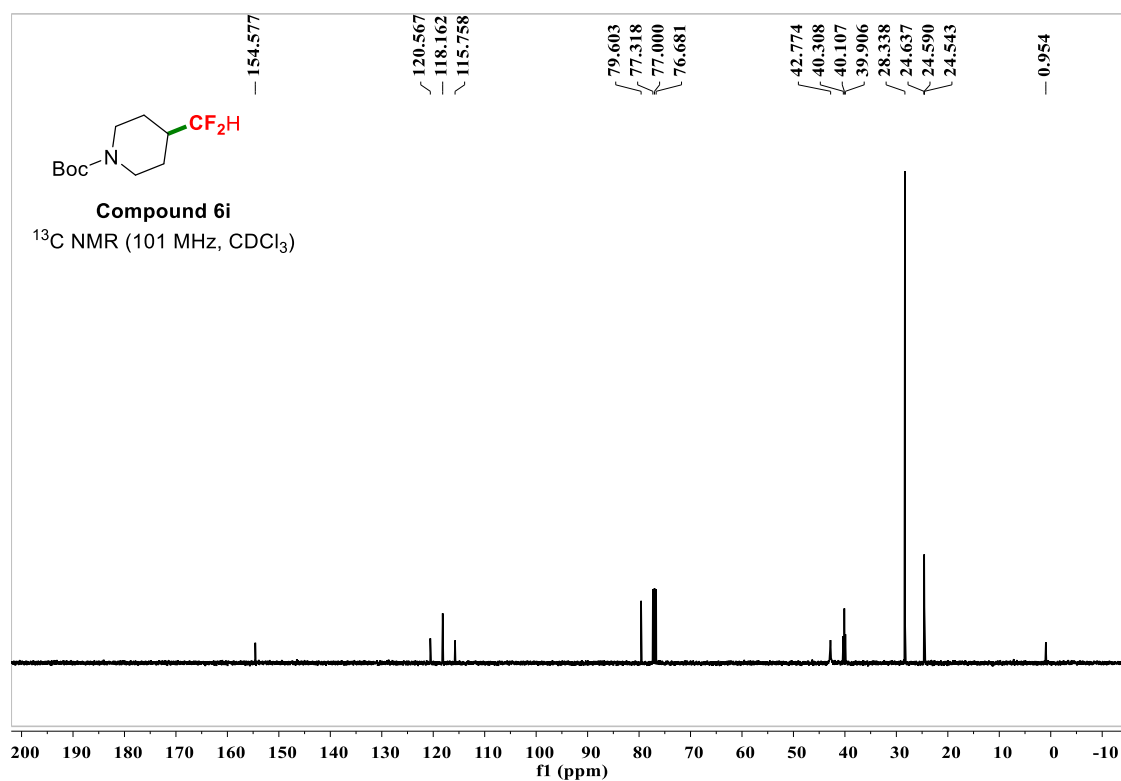

**Tert-butyl-3-(difluoromethyl)pyrrolidine-1-carboxylate (6j).**

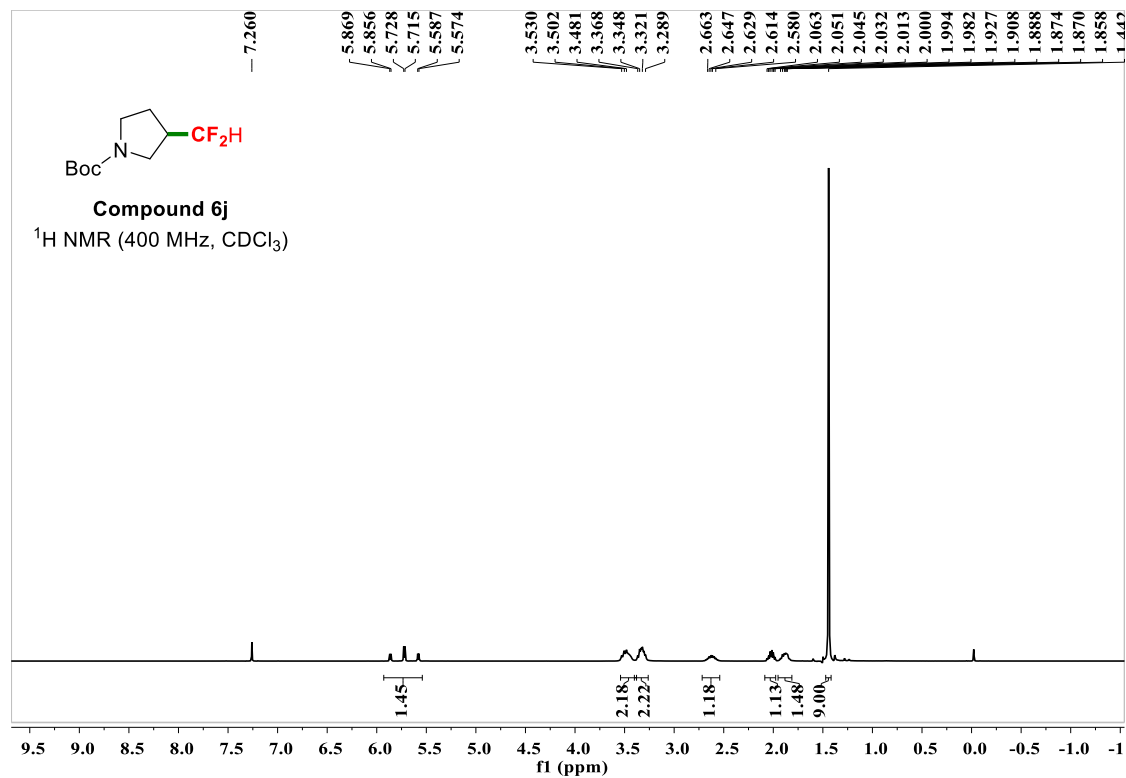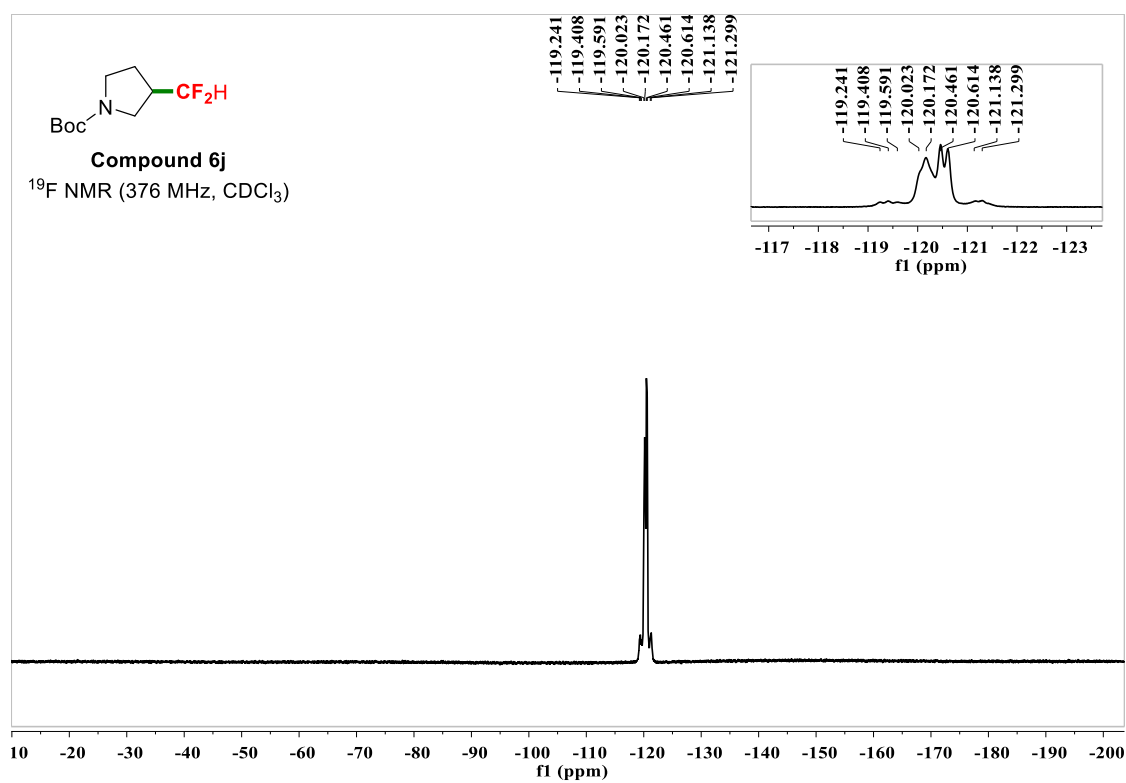



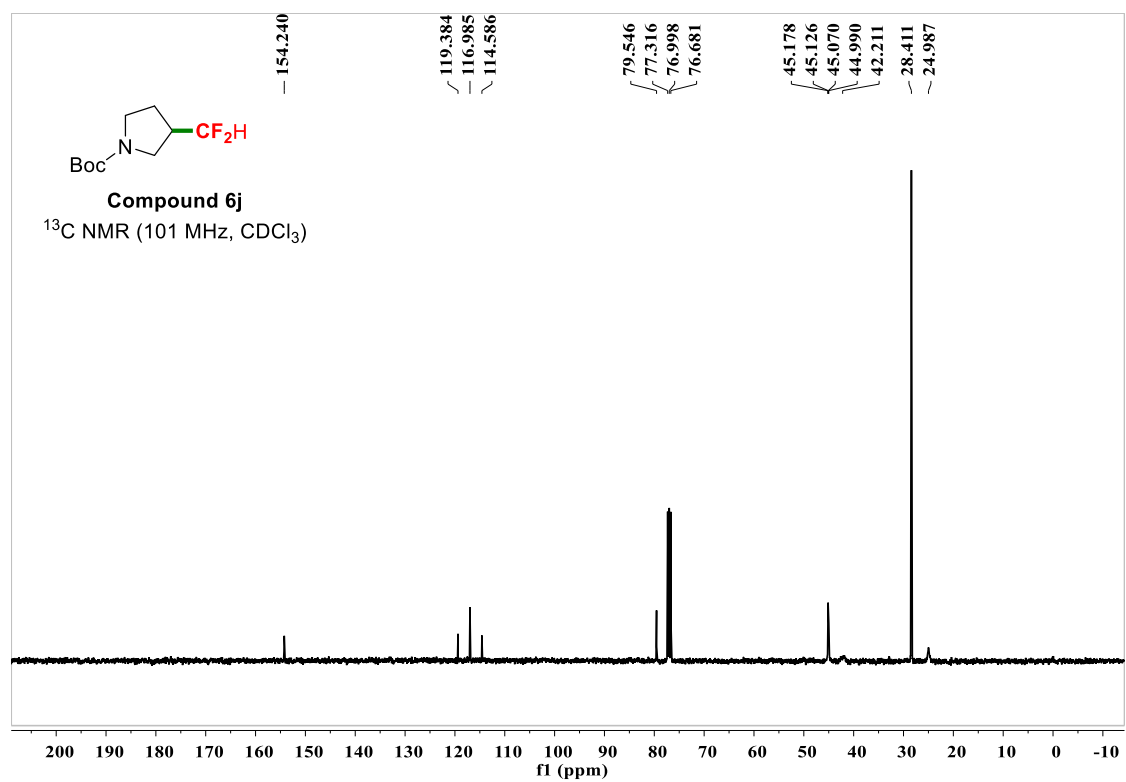

**(4,4-Difluoro-3-methylbutyl)benzene (6l).**

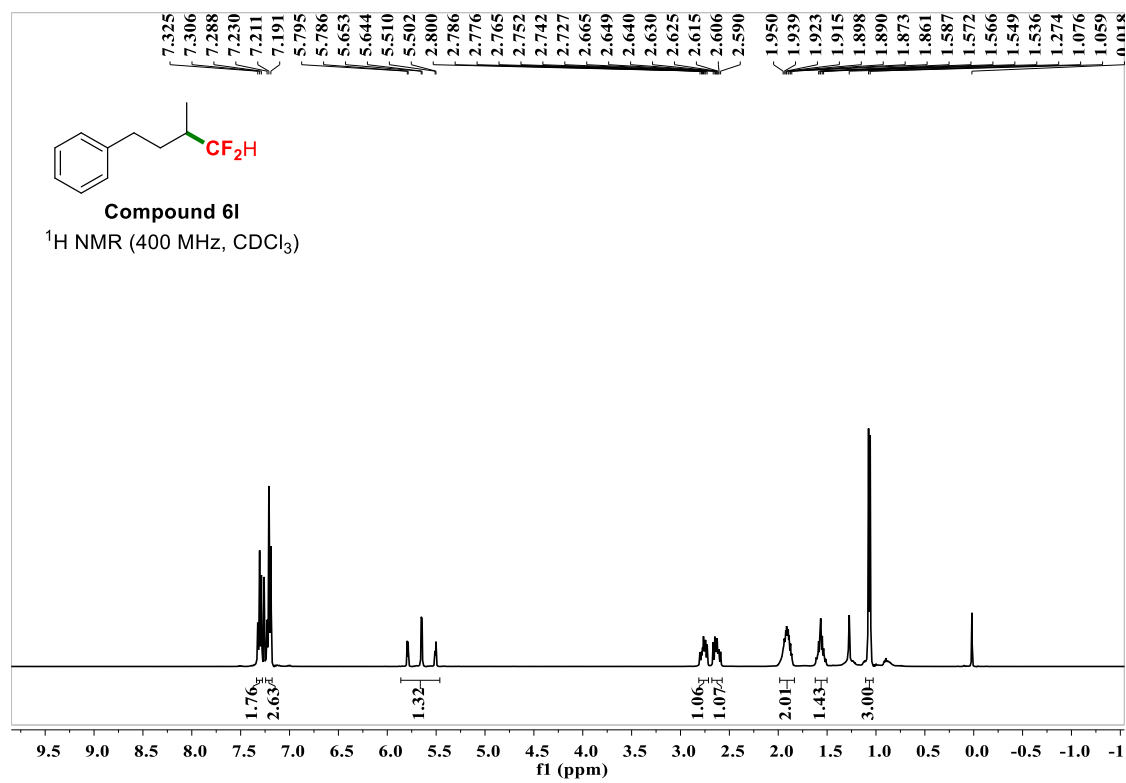

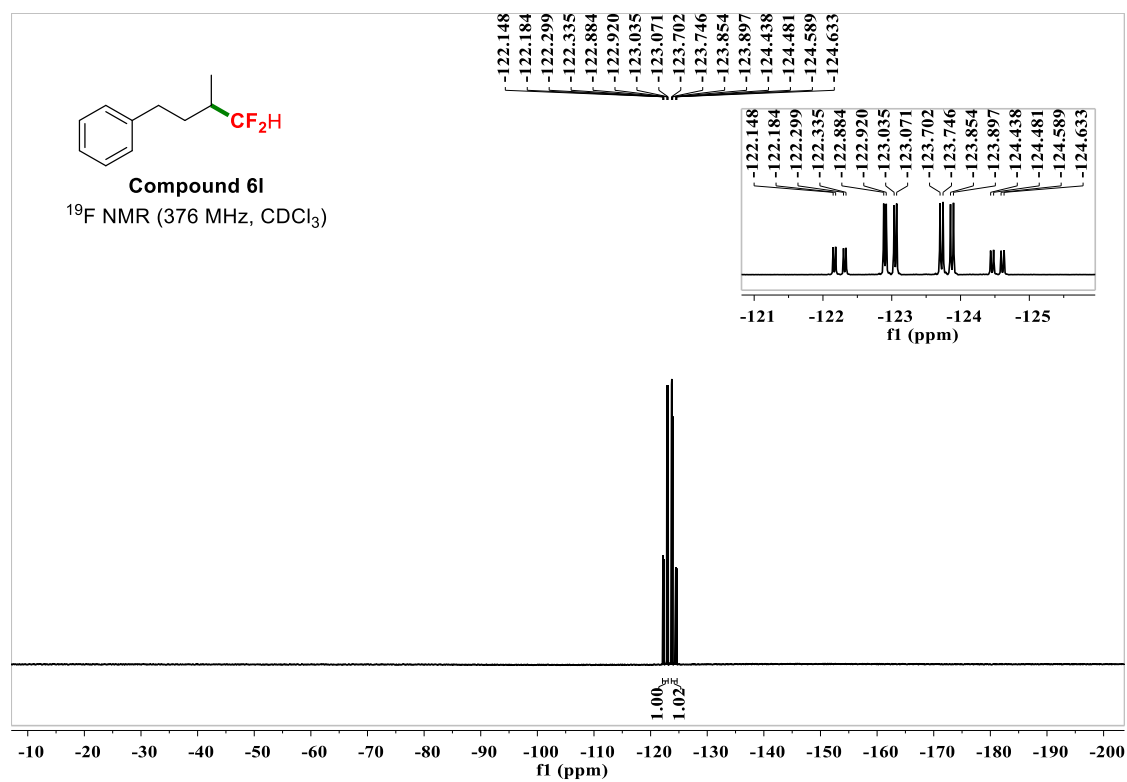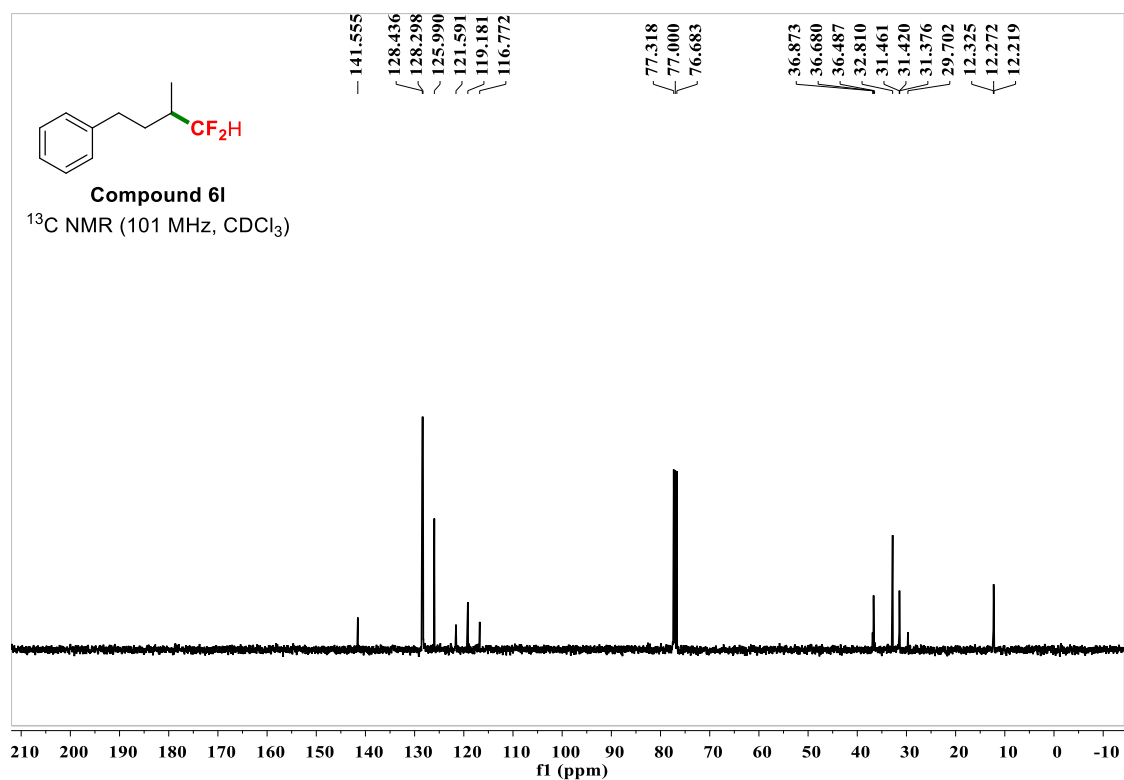

**Tert-butyl 4-(1,1,2,2-tetrafluoro-2-phenylethyl)piperidine-1-carboxylate (7i).**

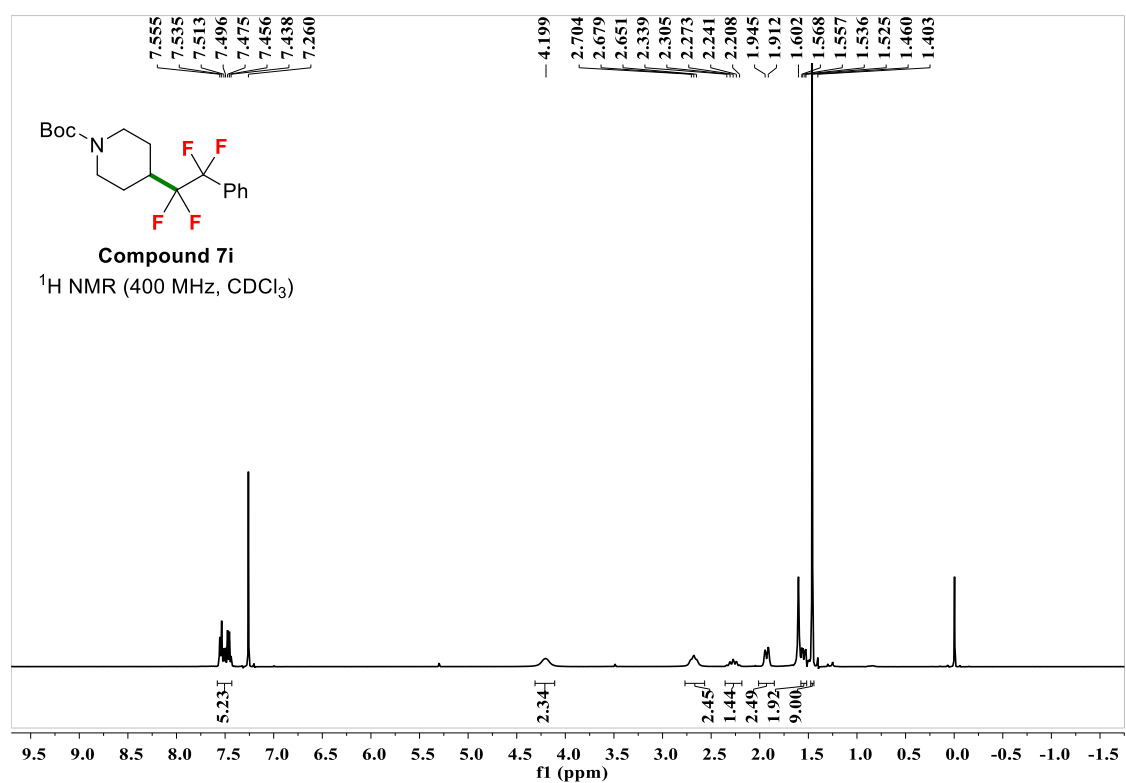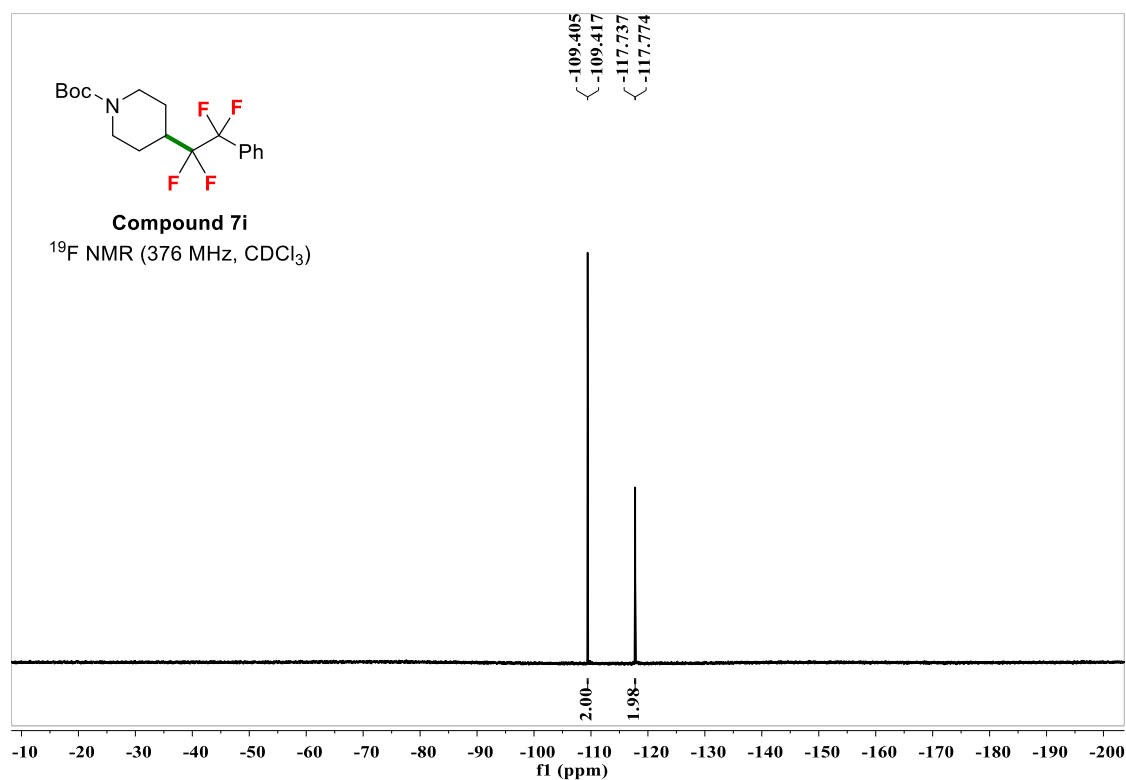

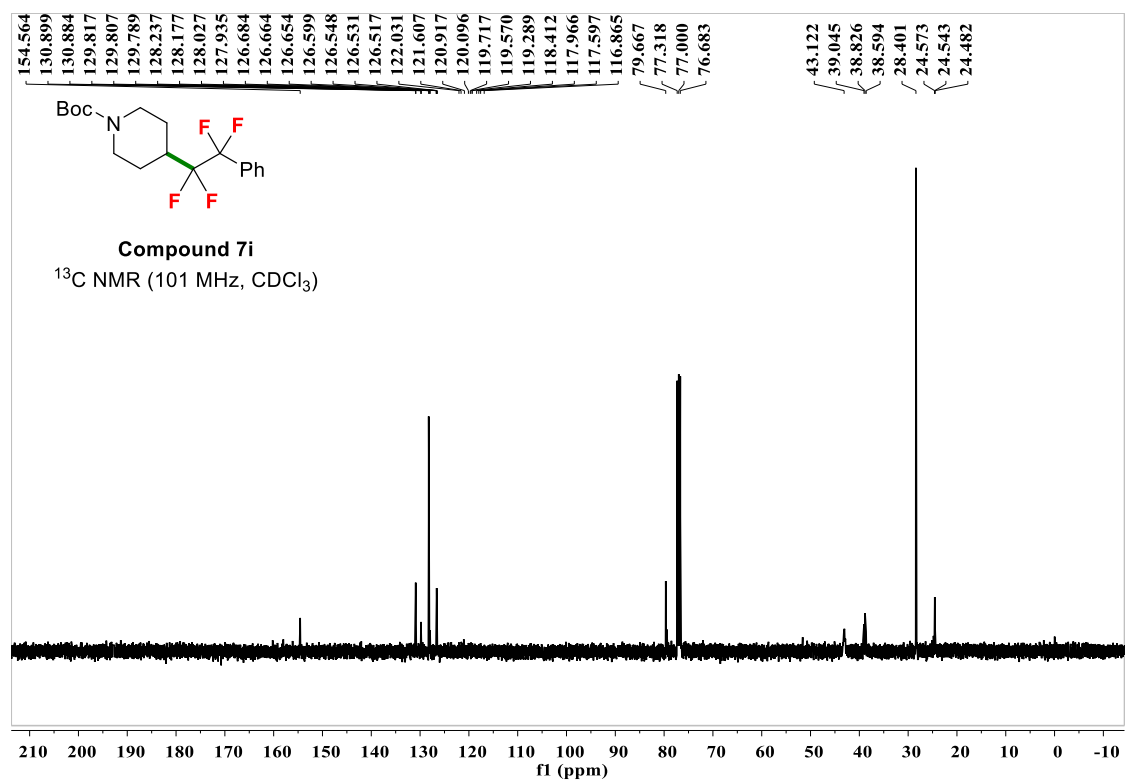

**(1,1,2,2-tetrafluoro-3-methylpentane-1,5-diyl)dibenzene (7i).**

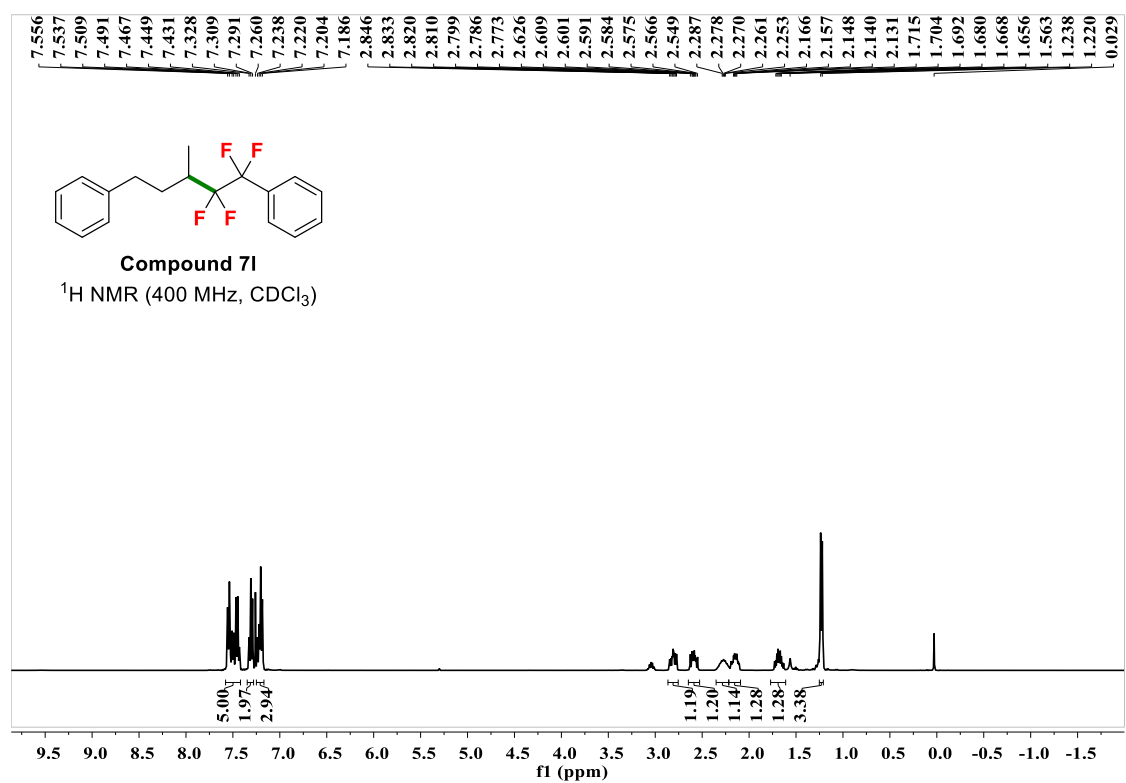

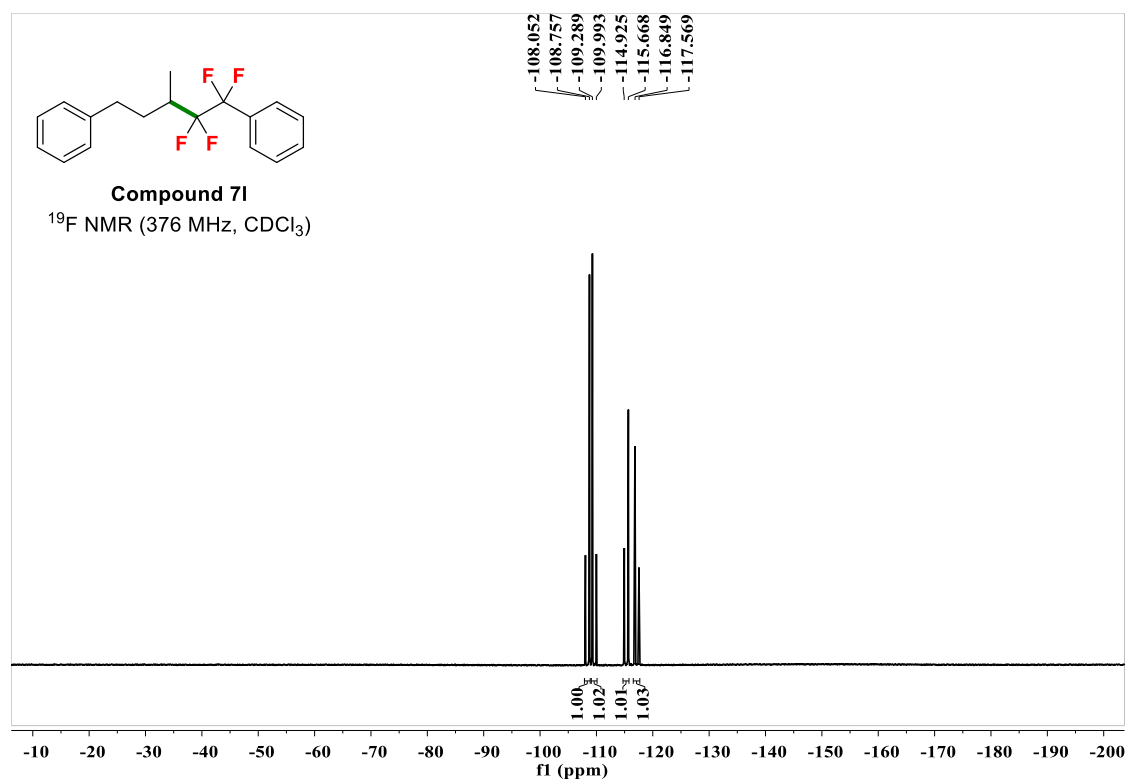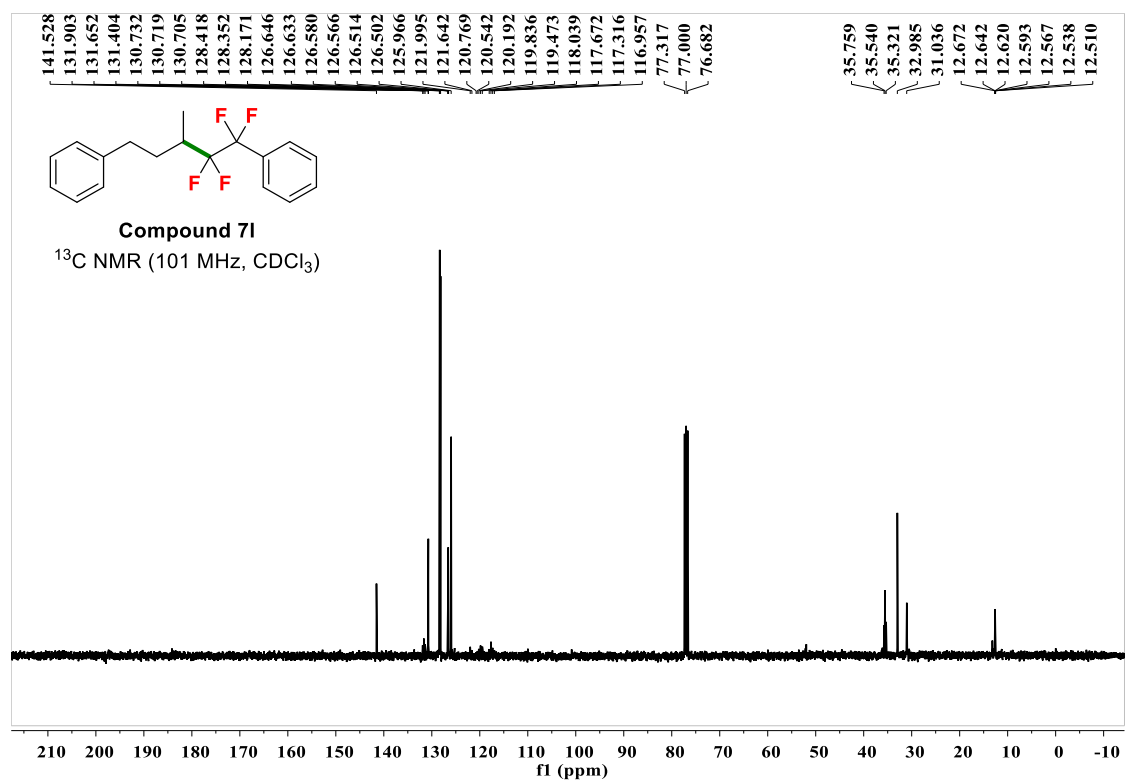

**1-Cyclododecyl-1,1-difluoro-2-phenylbut-3-en-2-ol (8e).**

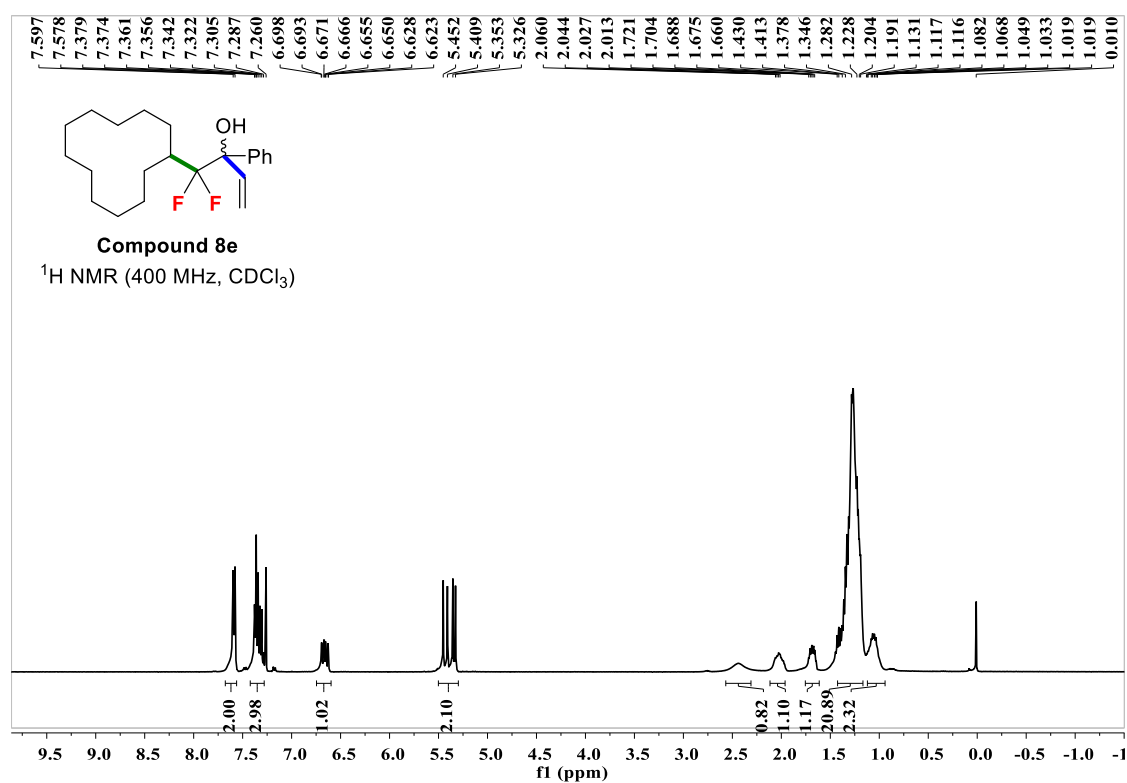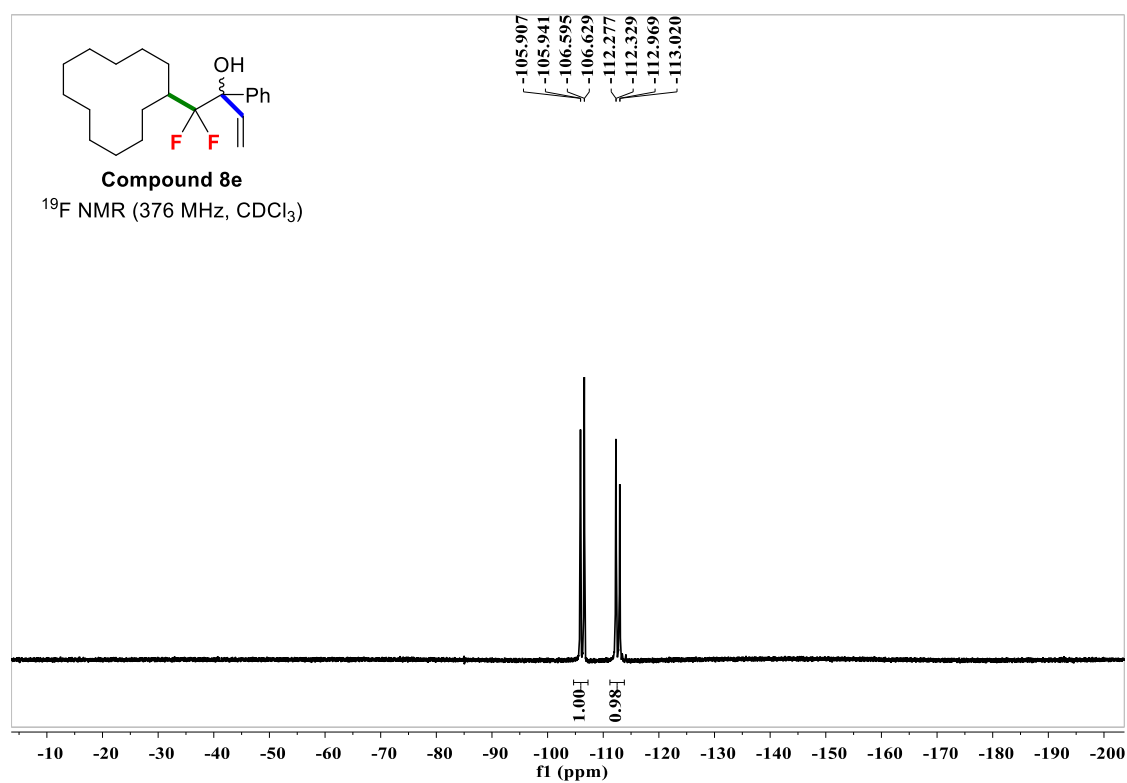

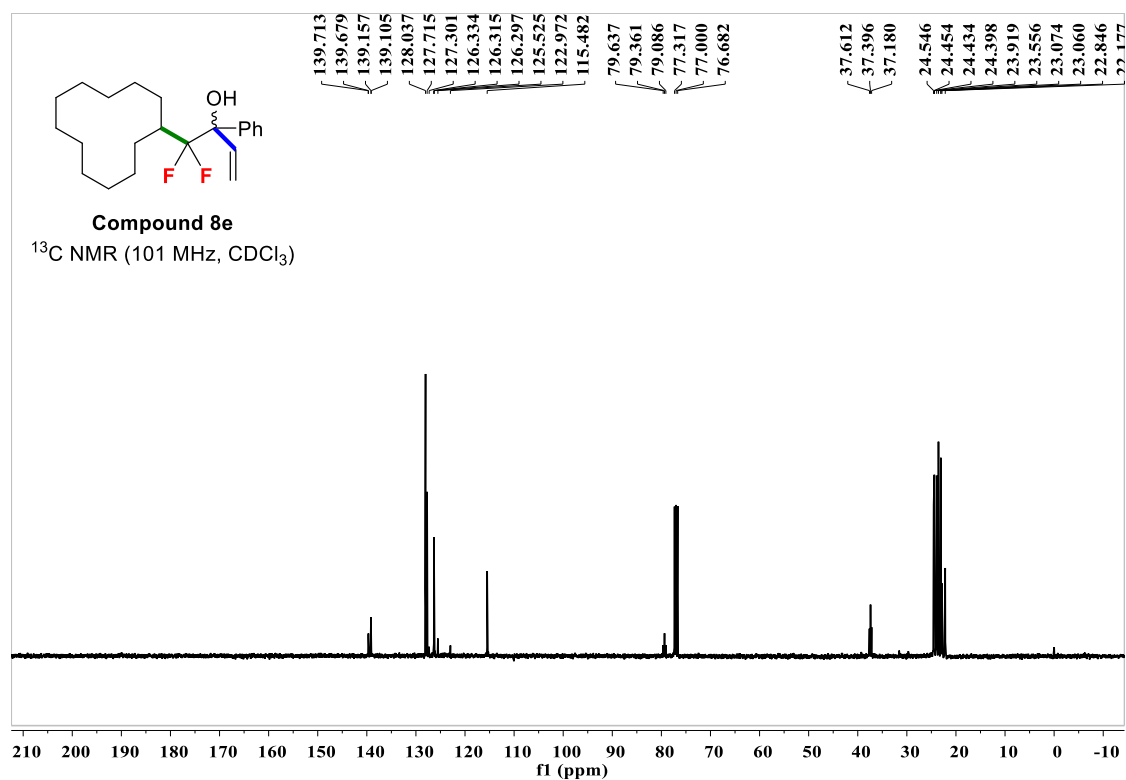

**Tert-butyl 4-(1,1-difluoro-2-hydroxy-2-phenylbut-3-en-1-yl)piperidine-1-carboxylate (8i).**

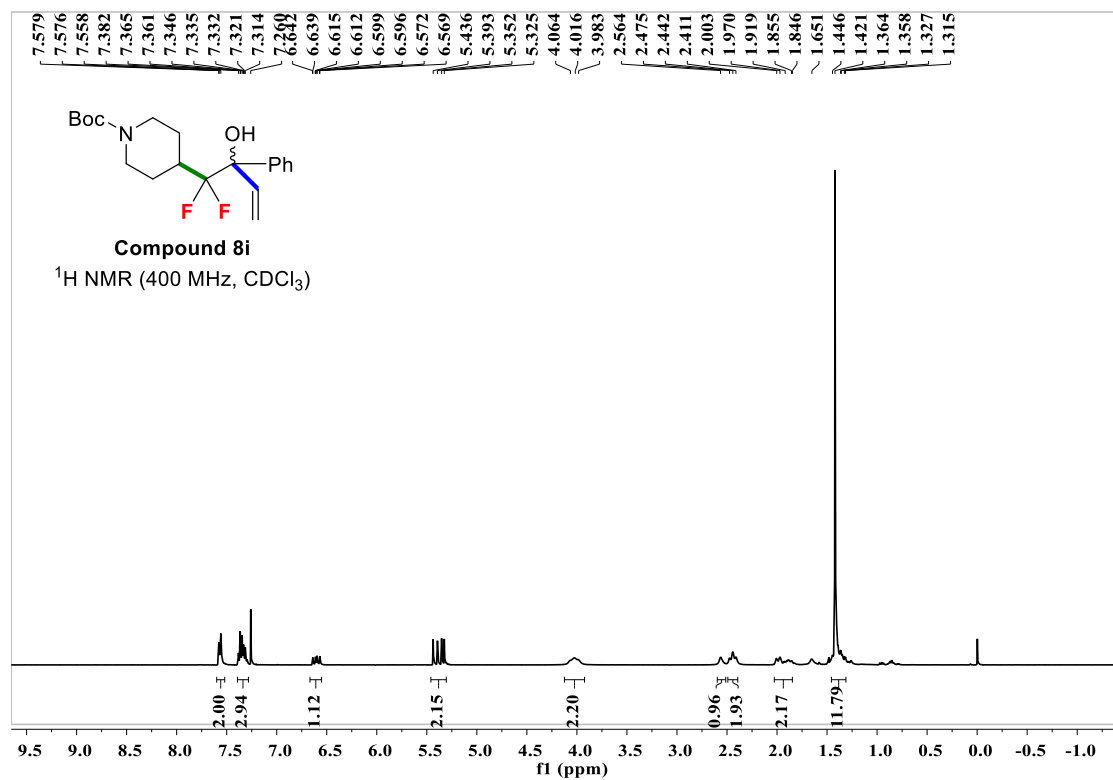

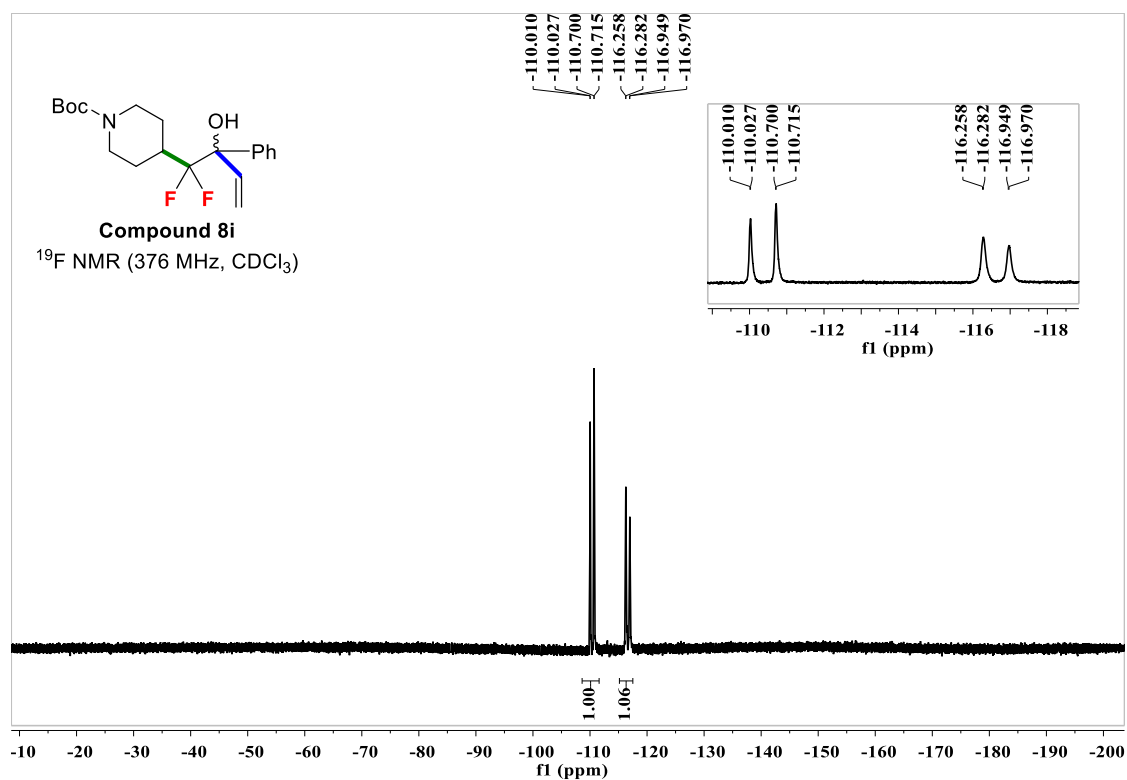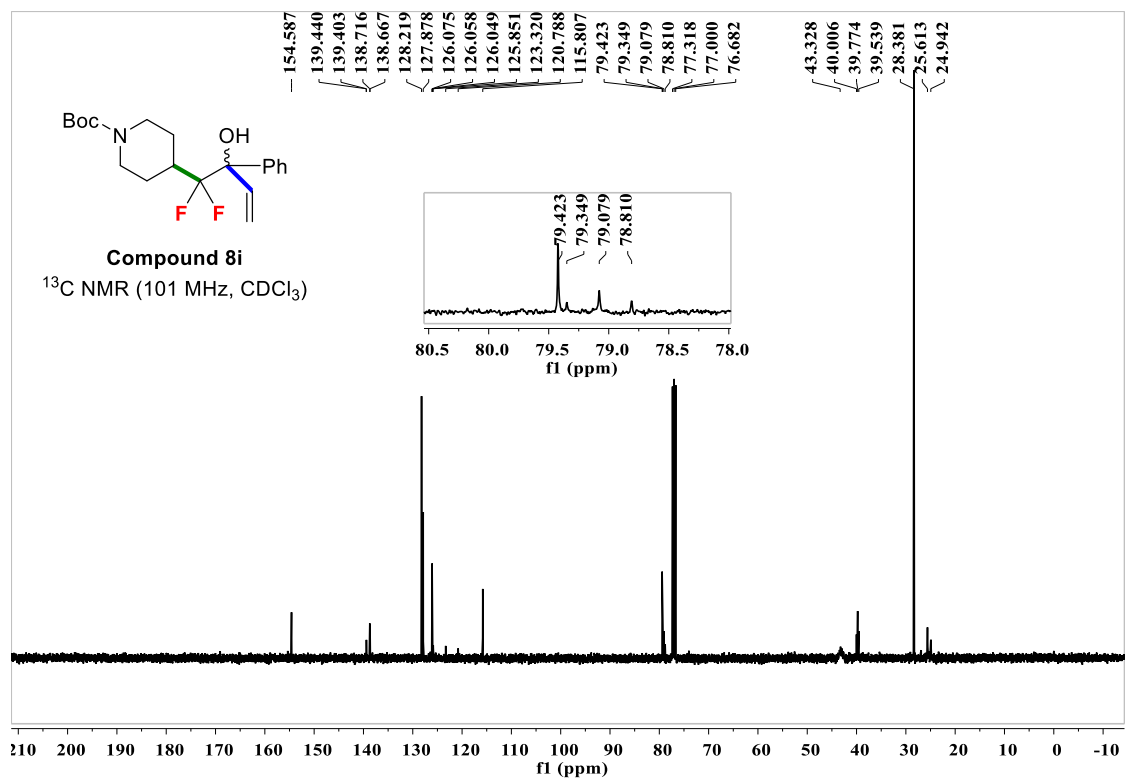



## 2-Cyclododecyl-2,2-difluoro-1-phenylethan-1-ol (9e).

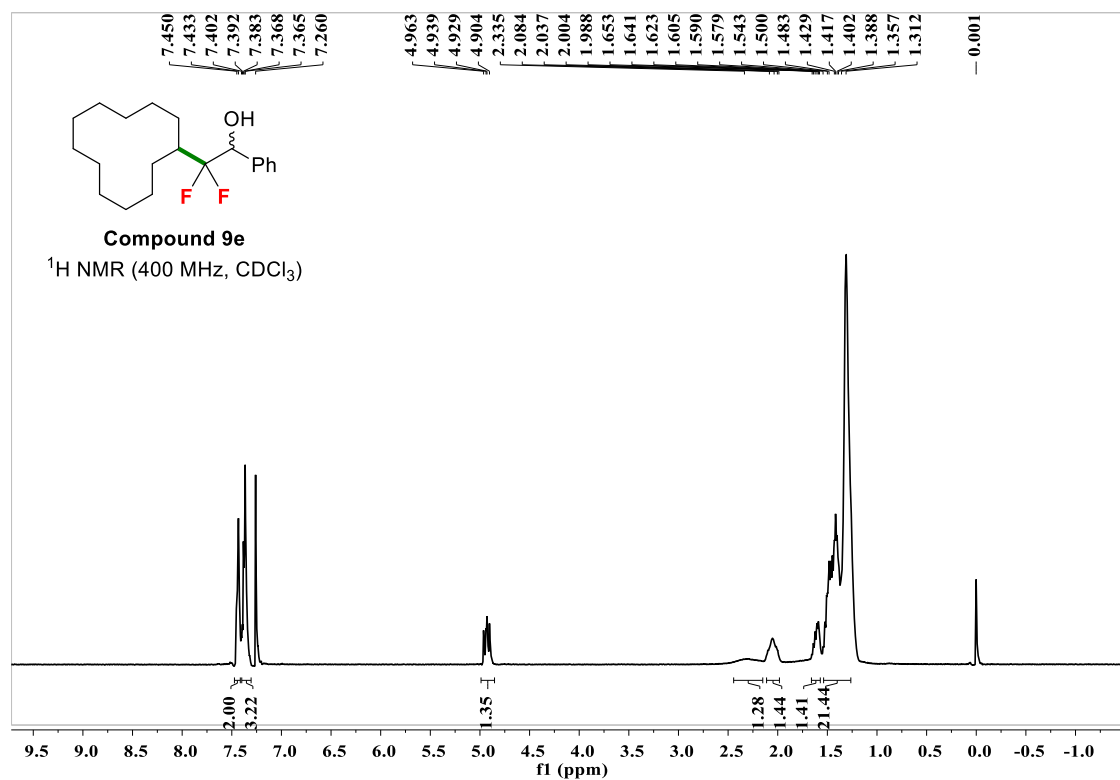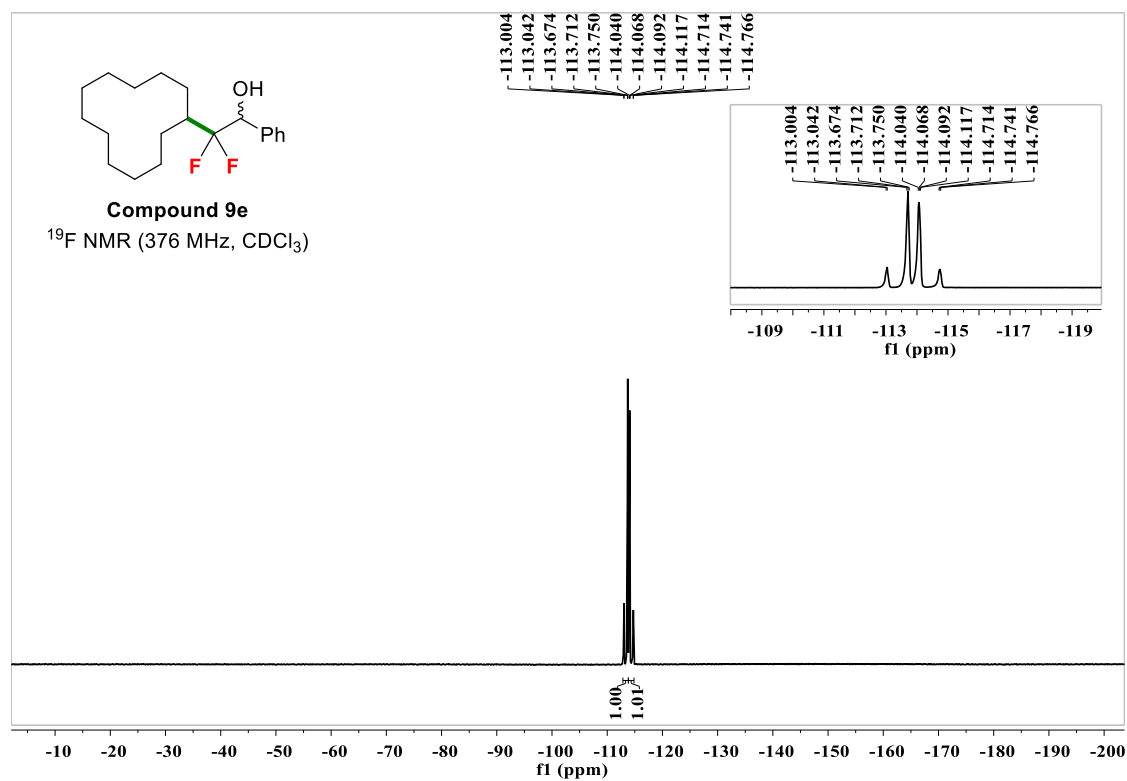

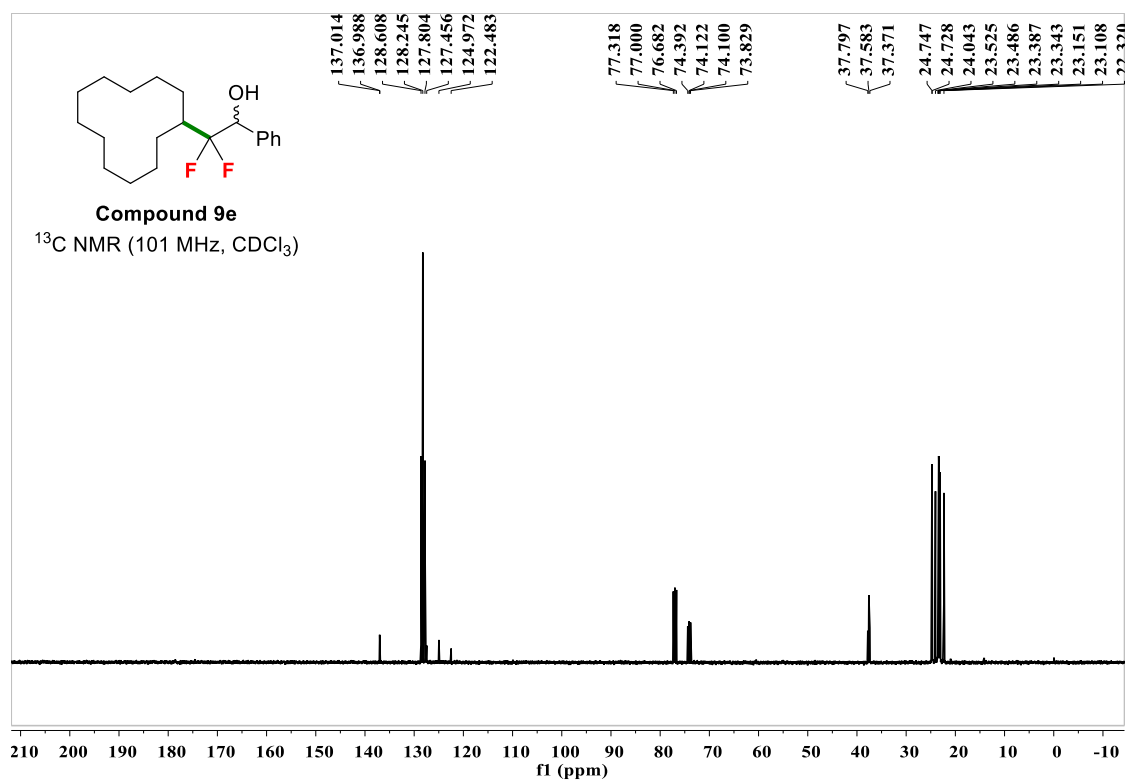

**Tert-butyl 4-(1,1-difluoro-2-hydroxy-2-phenylethyl)piperidine-1-carboxylate (9i).**

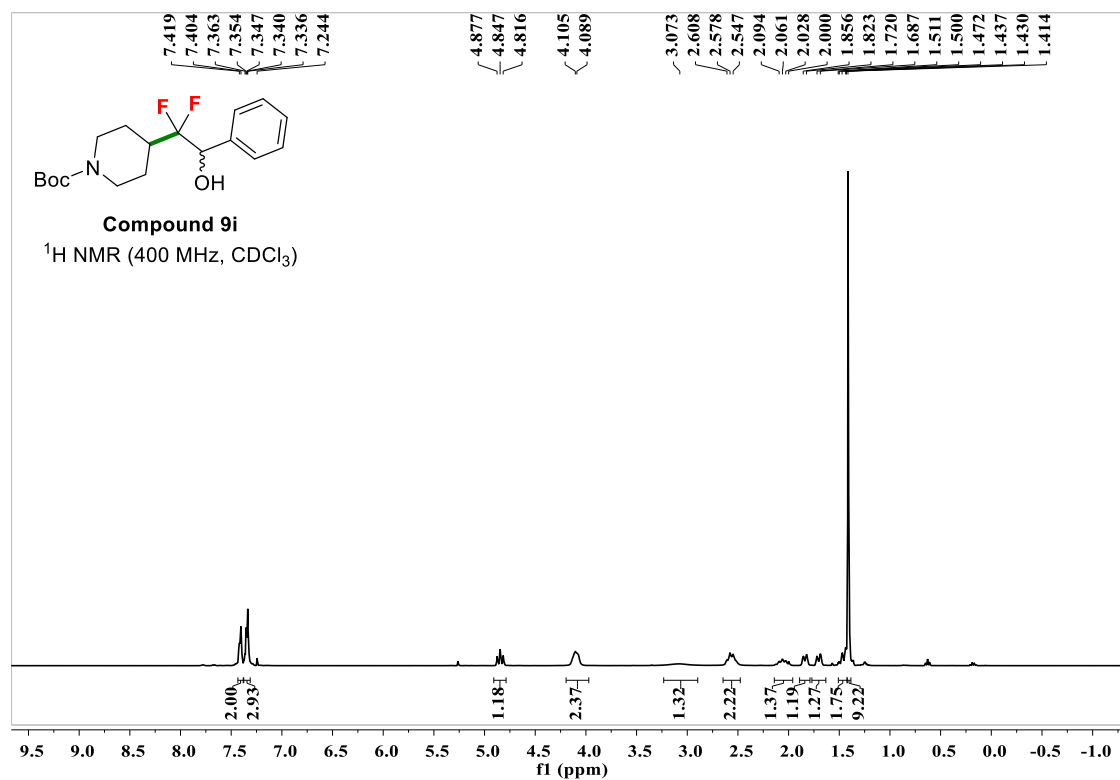

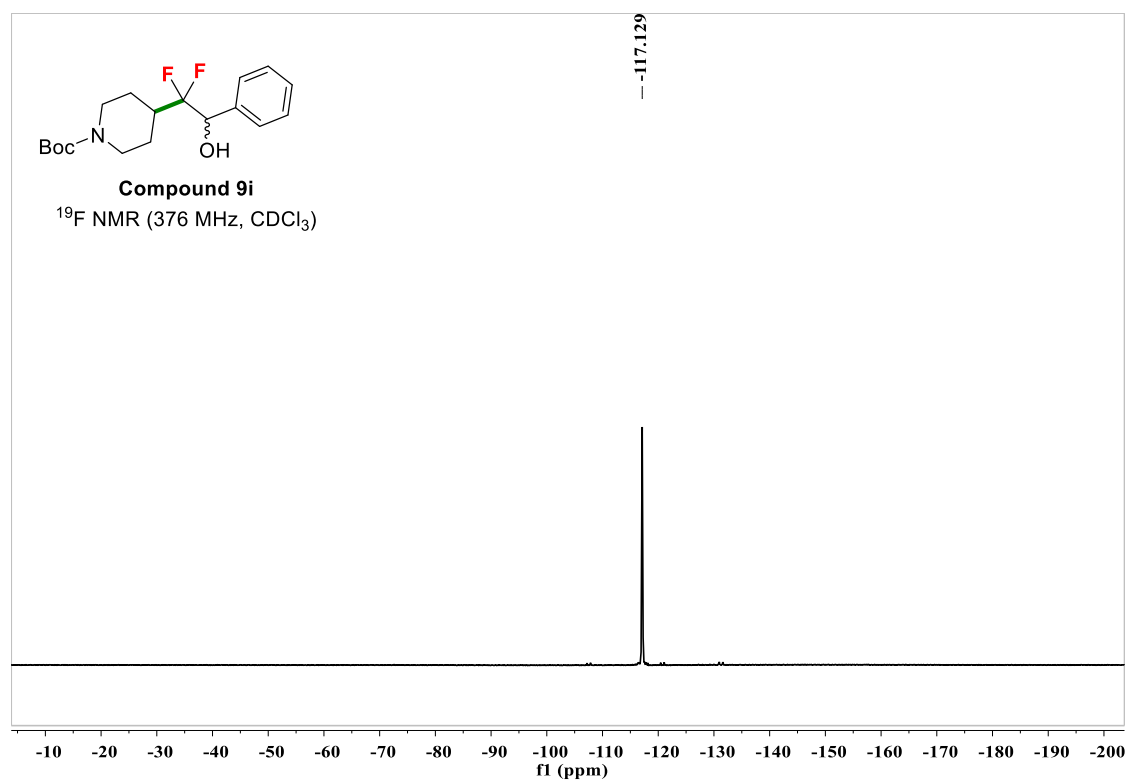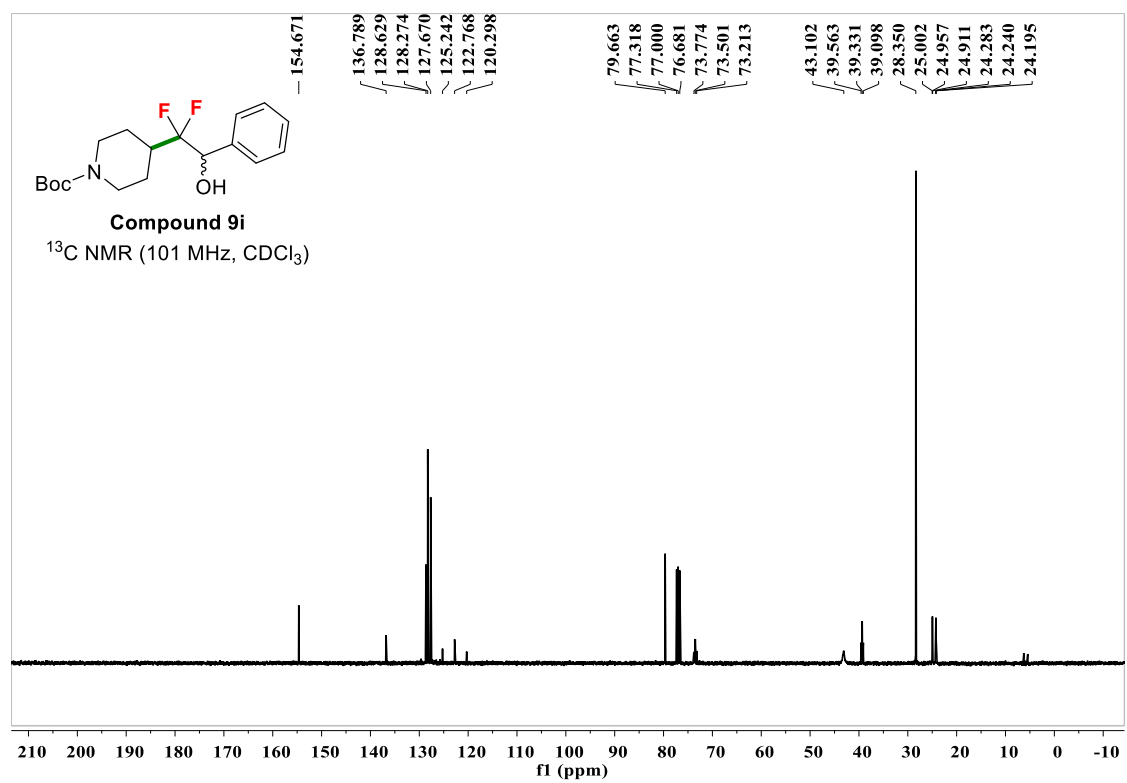

**2,2-Difluoro-3-methyl-1,5-diphenylpentan-1-ol (9l).**

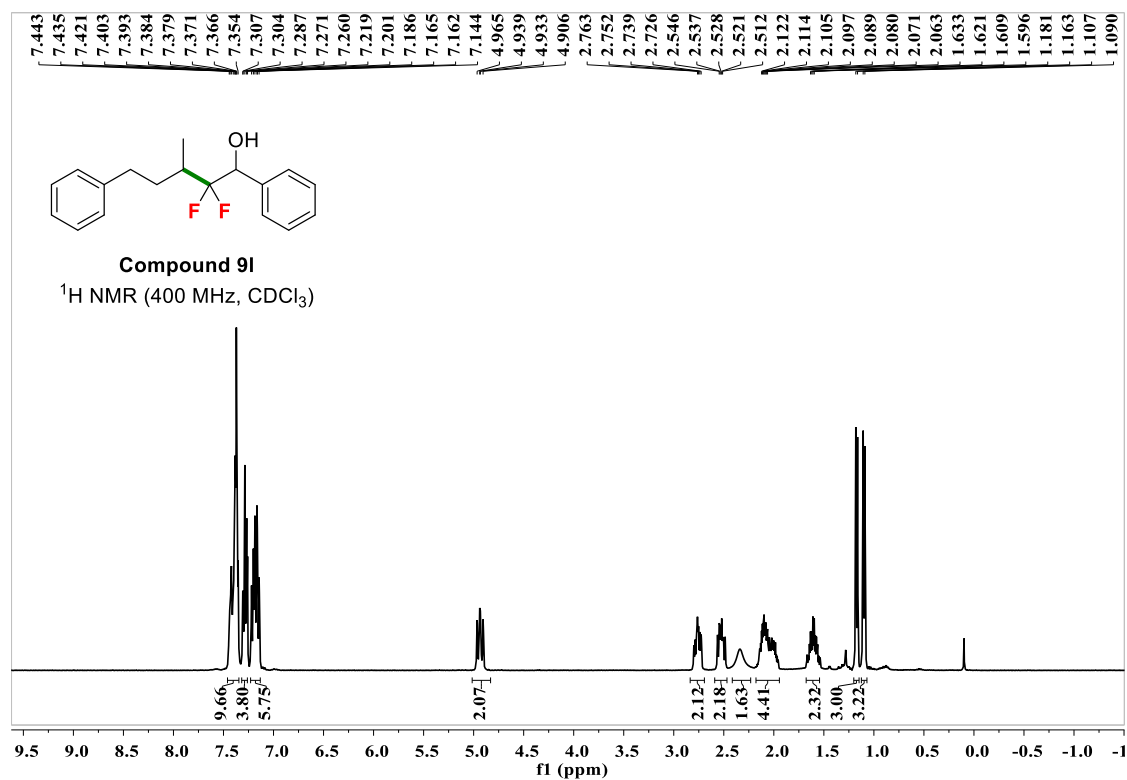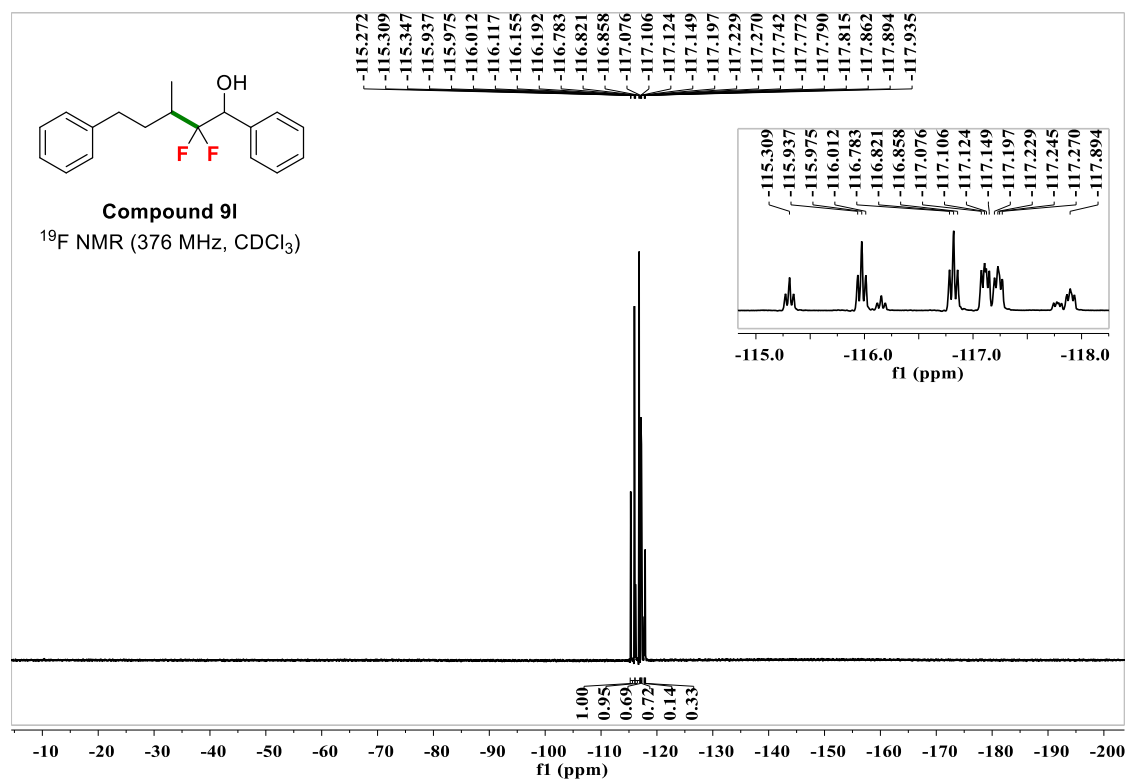

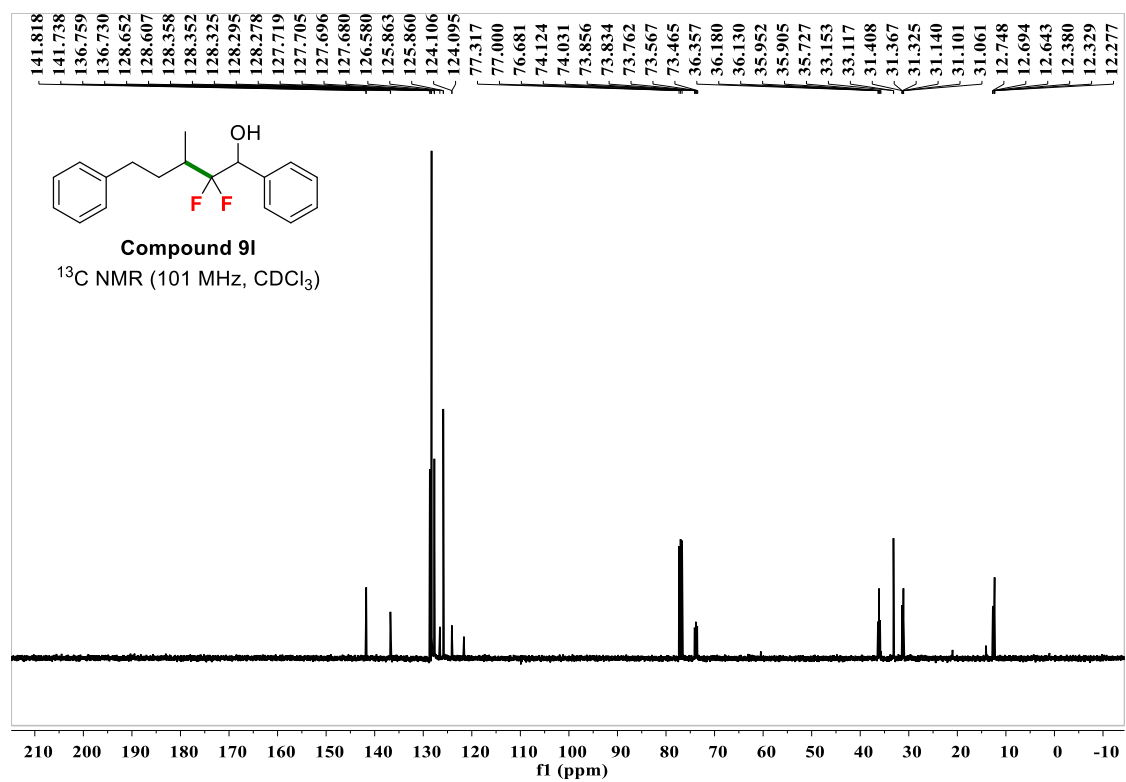

**Methyl (E)-6,6-difluoro-7-oxo-7-phenylhept-2-enoate (11).**

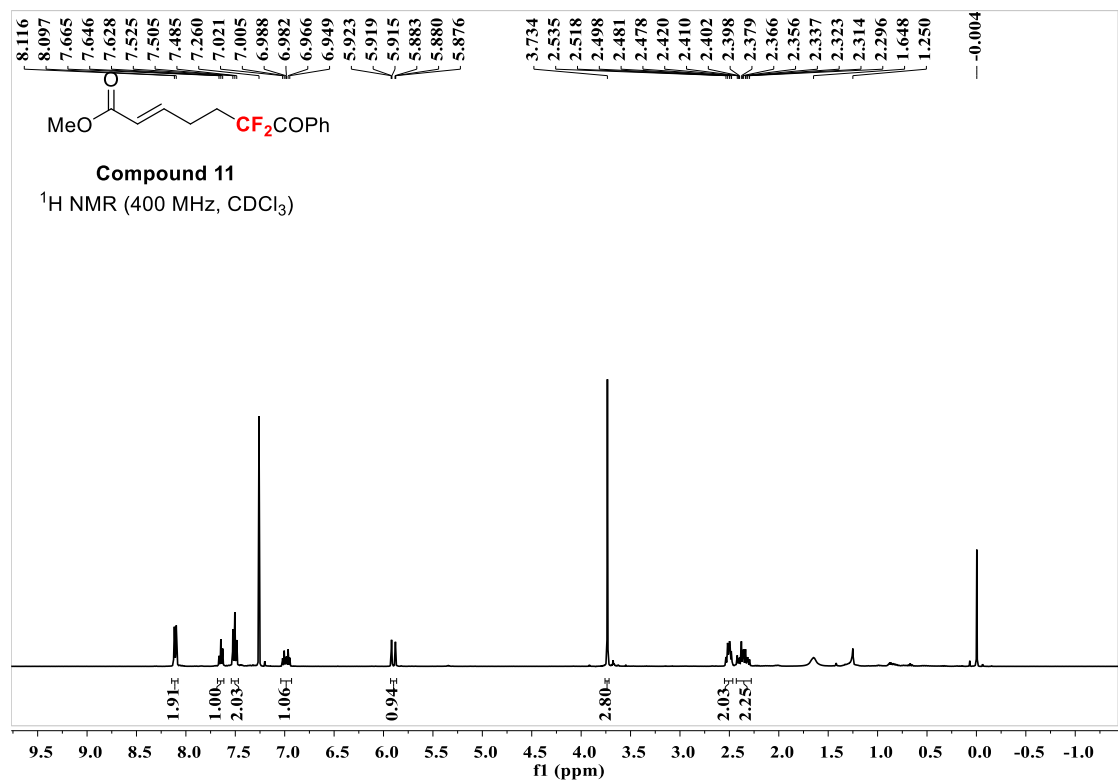

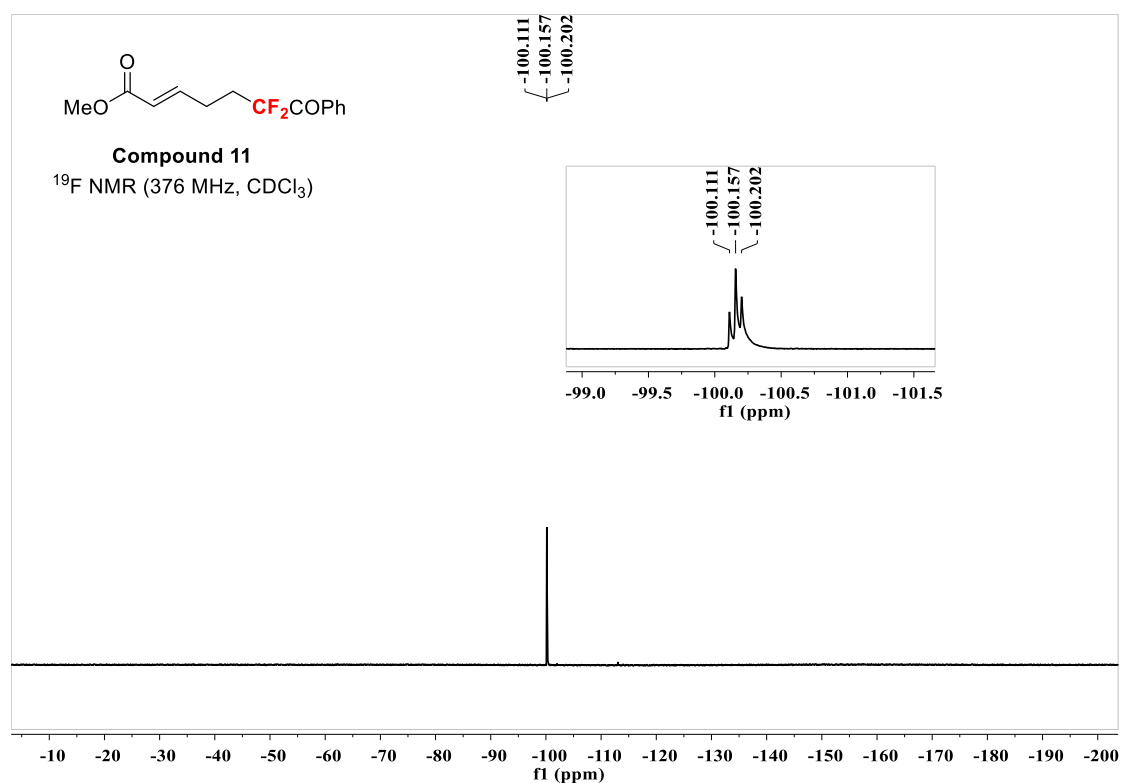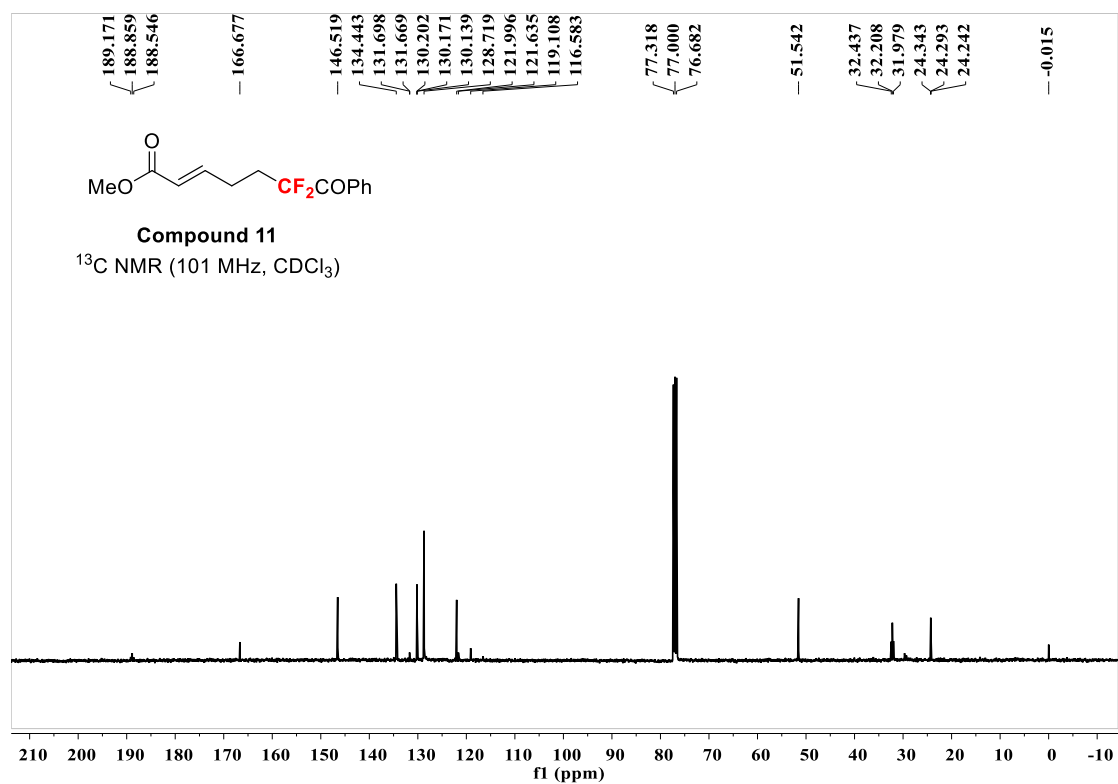

Supplement: d0cc05725h1.pdf [file d0cc05725h1.pdf]
